# Supplementary material
Source: Elsevier journal article supplement (https://univ-rennes.hal.science/hal-01532174v1/file/mmc6.zip)
Supplement: mmc6 [file mmc6.zip › Complex_11.cif]

data_mf_jc_jc016py_0m
_audit_creation_date              2016-08-15
_audit_creation_method
;
Olex2 1.2
(compiled 2016.02.19 svn.r3266 for OlexSys, GUI svn.r5155)
;
_shelxl_version_number            2014-3
_publ_contact_author_address      ?
_publ_contact_author_email        ?
_publ_contact_author_name         ''
_publ_contact_author_phone        ?
_publ_section_references
;
Bourhis, L.J., Dolomanov, O.V., Gildea, R.J., Howard, J.A.K., Puschmann, H.
 (2013). in preparation.

Bourhis, L.J., Dolomanov, O.V., Gildea, R.J., Howard, J.A.K., Puschmann, H.
 (2015). Acta Cryst. A71, 59-75.

Dolomanov, O.V., Bourhis, L.J., Gildea, R.J, Howard, J.A.K. & Puschmann, H.
 (2009), J. Appl. Cryst. 42, 339-341.

Sheldrick, G.M. (2015). Acta Cryst. C71, 3-8.
;
_chemical_name_common             ?
_chemical_name_systematic
;
 ?
;
_chemical_formula_moiety          'C23 H16 Cu F N3 O4'
_chemical_formula_sum             'C23 H16 Cu F N3 O4'
_chemical_formula_weight          480.93
_chemical_melting_point           ?
loop_
  _atom_type_symbol
  _atom_type_description
  _atom_type_scat_dispersion_real
  _atom_type_scat_dispersion_imag
  _atom_type_scat_source
 'C' 'C' 0.0033 0.0016 'International Tables Vol C Tables 4.2.6.8 and 6.1.1.4'
 'H' 'H' 0.0000 0.0000 'International Tables Vol C Tables 4.2.6.8 and 6.1.1.4'
 'Cu' 'Cu' 0.3201 1.2651 'International Tables Vol C Tables 4.2.6.8 and 6.1.1.4'
 'F' 'F' 0.0171 0.0103 'International Tables Vol C Tables 4.2.6.8 and 6.1.1.4'
 'N' 'N' 0.0061 0.0033 'International Tables Vol C Tables 4.2.6.8 and 6.1.1.4'
 'O' 'O' 0.0106 0.0060 'International Tables Vol C Tables 4.2.6.8 and 6.1.1.4'

_shelx_space_group_comment
;
The symmetry employed for this shelxl refinement is uniquely defined
by the following loop, which should always be used as a source of
symmetry information in preference to the above space-group names.
They are only intended as comments.
;
_space_group_crystal_system       'monoclinic'
_space_group_IT_number            14
_space_group_name_H-M_alt         'P 1 21/c 1'
_space_group_name_Hall            '-P 2ybc'
loop_
  _space_group_symop_operation_xyz
 'x, y, z'
 '-x, y+1/2, -z+1/2'
 '-x, -y, -z'
 'x, -y-1/2, z-1/2'

_cell_length_a                    7.786(4)
_cell_length_b                    10.420(6)
_cell_length_c                    25.034(13)
_cell_angle_alpha                 90
_cell_angle_beta                  95.86(2)
_cell_angle_gamma                 90
_cell_volume                      2020.5(18)
_cell_formula_units_Z             4
_cell_measurement_reflns_used     4974
_cell_measurement_temperature     296(2)
_cell_measurement_theta_max       25.21
_cell_measurement_theta_min       2.55
_shelx_estimated_absorpt_T_max    ?
_shelx_estimated_absorpt_T_min    ?
_exptl_absorpt_coefficient_mu     1.127
_exptl_absorpt_correction_T_max   1.0000
_exptl_absorpt_correction_T_min   0.8391
_exptl_absorpt_correction_type    numerical
_exptl_absorpt_process_details
;
SADABS-2012/1 (Bruker,2012) was used for absorption correction.
wR2(int) was 0.0712 before and 0.0500 after correction.
The Ratio of minimum to maximum transmission is 0.8391.
The \l/2 correction factor is 0.0015.
;
_exptl_crystal_colour             'clear dark green'
_exptl_crystal_colour_lustre      clear
_exptl_crystal_colour_modifier    dark
_exptl_crystal_colour_primary     green
_exptl_crystal_density_diffrn     1.581
_exptl_crystal_density_meas       .
_exptl_crystal_density_method     ?
_exptl_crystal_description        block
_exptl_crystal_F_000              980
_exptl_crystal_size_max           0.207
_exptl_crystal_size_mid           0.176
_exptl_crystal_size_min           0.11
_exptl_special_details
;
 ?
;
_exptl_transmission_factor_max    ?
_exptl_transmission_factor_min    ?
_diffrn_reflns_av_R_equivalents   0.0601
_diffrn_reflns_av_unetI/netI      0.0420
_diffrn_reflns_Laue_measured_fraction_full 0.986
_diffrn_reflns_Laue_measured_fraction_max 0.977
_diffrn_reflns_limit_h_max        9
_diffrn_reflns_limit_h_min        -9
_diffrn_reflns_limit_k_max        13
_diffrn_reflns_limit_k_min        -13
_diffrn_reflns_limit_l_max        30
_diffrn_reflns_limit_l_min        -31
_diffrn_reflns_number             19554
_diffrn_reflns_point_group_measured_fraction_full 0.986
_diffrn_reflns_point_group_measured_fraction_max 0.977
_diffrn_reflns_theta_full         26.000
_diffrn_reflns_theta_max          26.377
_diffrn_reflns_theta_min          2.549
_diffrn_ambient_temperature       296.15
_diffrn_detector_area_resol_mean  ?
_diffrn_measured_fraction_theta_full 0.986
_diffrn_measured_fraction_theta_max 0.977
_diffrn_measurement_device_type   'Bruker APEX-II CCD'
_diffrn_measurement_method        '\f and \w scans'
_diffrn_radiation_monochromator   'graphite'
_diffrn_radiation_type            MoK\a
_diffrn_radiation_wavelength      0.71073
_diffrn_source                    ?
_diffrn_standards_number          0
_reflns_Friedel_coverage          0.000
_reflns_Friedel_fraction_full     .
_reflns_Friedel_fraction_max      .
_reflns_number_gt                 3029
_reflns_number_total              4037
_reflns_special_details
;
 Reflections were merged by SHELXL according to the crystal
 class for the calculation of statistics and refinement.
 
 _reflns_Friedel_fraction is defined as the number of unique
 Friedel pairs measured divided by the number that would be
 possible theoretically, ignoring centric projections and
 systematic absences.
;
_reflns_threshold_expression      'I > 2\s(I)'
_computing_cell_refinement        'SAINT v8.27A (Bruker, 2012)'
_computing_data_collection        ?
_computing_data_reduction         'SAINT v8.27A (Bruker, 2012)'
_computing_molecular_graphics     'Olex2 (Dolomanov et al., 2009)'
_computing_publication_material   'Olex2 (Dolomanov et al., 2009)'
_computing_structure_refinement   'ShelXL (Sheldrick, 2015)'
_computing_structure_solution     'olex2.solve (Bourhis et al., 2015)'
_refine_diff_density_max          0.402
_refine_diff_density_min          -0.350
_refine_diff_density_rms          0.072
_refine_ls_extinction_coef        .
_refine_ls_extinction_method      none
_refine_ls_goodness_of_fit_ref    1.032
_refine_ls_hydrogen_treatment     constr
_refine_ls_matrix_type            full
_refine_ls_number_parameters      290
_refine_ls_number_reflns          4037
_refine_ls_number_restraints      0
_refine_ls_R_factor_all           0.0683
_refine_ls_R_factor_gt            0.0420
_refine_ls_restrained_S_all       1.032
_refine_ls_shift/su_max           0.001
_refine_ls_shift/su_mean          0.000
_refine_ls_structure_factor_coef  Fsqd
_refine_ls_weighting_details
'w=1/[\s^2^(Fo^2^)+(0.0550P)^2^+0.6490P] where P=(Fo^2^+2Fc^2^)/3'
_refine_ls_weighting_scheme       calc
_refine_ls_wR_factor_gt           0.0951
_refine_ls_wR_factor_ref          0.1046
_refine_special_details
;
 ?
;
_olex2_refinement_description
;
1. Fixed Uiso
 At 1.2 times of:
  All C(H) groups
 At 1.5 times of:
  All C(H,H,H) groups
2.a Aromatic/amide H refined with riding coordinates:
 C2(H2), C3(H3), C5(H5), C6(H6), C8(H8), C12(H12), C13(H13), C14(H14),
 C15(H15), C17(H17), C20(H20), C21(H21), C23(H23)
2.b Idealised Me refined as rotating group:
 C10(H10A,H10B,H10C)
;
_atom_sites_solution_hydrogens    geom
_atom_sites_solution_primary      iterative
_atom_sites_solution_secondary    ?
loop_
  _atom_site_label
  _atom_site_type_symbol
  _atom_site_fract_x
  _atom_site_fract_y
  _atom_site_fract_z
  _atom_site_U_iso_or_equiv
  _atom_site_adp_type
  _atom_site_occupancy
  _atom_site_site_symmetry_order
  _atom_site_calc_flag
  _atom_site_refinement_flags_posn
  _atom_site_refinement_flags_adp
  _atom_site_refinement_flags_occupancy
  _atom_site_disorder_assembly
  _atom_site_disorder_group
 Cu1 Cu 0.20331(4) 0.01692(3) 0.52221(2) 0.03292(13) Uani 1 1 d . . . . .
 F1 F 0.4411(4) -0.1493(2) 0.22181(8) 0.0854(8) Uani 1 1 d . . . . .
 O1 O 0.2482(2) -0.01198(19) 0.44984(8) 0.0371(5) Uani 1 1 d . . . . .
 O2 O 0.0744(2) -0.14211(19) 0.51800(8) 0.0353(4) Uani 1 1 d . . . . .
 O3 O -0.0925(5) -0.4198(3) 0.72765(12) 0.0996(11) Uani 1 1 d . . . . .
 O4 O -0.2235(5) -0.5408(3) 0.66728(14) 0.0982(11) Uani 1 1 d . . . . .
 N1 N 0.3330(3) 0.1776(2) 0.53024(9) 0.0322(5) Uani 1 1 d . . . . .
 N2 N 0.1649(3) 0.0438(2) 0.59717(10) 0.0336(5) Uani 1 1 d . . . . .
 N3 N -0.1374(5) -0.4470(3) 0.68104(15) 0.0673(9) Uani 1 1 d . . . . .
 C1 C 0.4190(5) -0.0980(3) 0.27065(13) 0.0528(9) Uani 1 1 d . . . . .
 C2 C 0.4861(5) 0.0208(3) 0.28307(14) 0.0536(9) Uani 1 1 d . . . . .
 H2 H 0.5450 0.0661 0.2586 0.064 Uiso 1 1 calc R . . . .
 C3 C 0.4641(4) 0.0716(3) 0.33263(12) 0.0435(7) Uani 1 1 d . . . . .
 H3 H 0.5069 0.1531 0.3414 0.052 Uiso 1 1 calc R . . . .
 C4 C 0.3787(3) 0.0033(3) 0.37005(12) 0.0347(6) Uani 1 1 d . . . . .
 C5 C 0.3102(4) -0.1160(3) 0.35467(12) 0.0443(7) Uani 1 1 d . . . . .
 H5 H 0.2501 -0.1623 0.3785 0.053 Uiso 1 1 calc R . . . .
 C6 C 0.3294(5) -0.1669(3) 0.30489(14) 0.0563(9) Uani 1 1 d . . . . .
 H6 H 0.2824 -0.2464 0.2949 0.068 Uiso 1 1 calc R . . . .
 C7 C 0.3601(3) 0.0497(3) 0.42574(11) 0.0339(6) Uani 1 1 d . . . . .
 C8 C 0.4634(4) 0.1499(3) 0.44825(12) 0.0377(7) Uani 1 1 d . . . . .
 H8 H 0.5488 0.1799 0.4280 0.045 Uiso 1 1 calc R . . . .
 C9 C 0.4521(3) 0.2104(3) 0.49824(12) 0.0362(7) Uani 1 1 d . . . . .
 C10 C 0.5896(4) 0.3110(3) 0.51335(15) 0.0549(9) Uani 1 1 d . . . . .
 H10A H 0.5564 0.3906 0.4960 0.082 Uiso 1 1 calc GR . . . .
 H10B H 0.6976 0.2829 0.5020 0.082 Uiso 1 1 calc GR . . . .
 H10C H 0.6018 0.3229 0.5516 0.082 Uiso 1 1 calc GR . . . .
 C11 C 0.2971(3) 0.2427(3) 0.57735(12) 0.0358(7) Uani 1 1 d . . . . .
 C12 C 0.3249(4) 0.3725(3) 0.58838(14) 0.0481(8) Uani 1 1 d . . . . .
 H12 H 0.3718 0.4244 0.5633 0.058 Uiso 1 1 calc R . . . .
 C13 C 0.2837(5) 0.4250(4) 0.63596(16) 0.0592(9) Uani 1 1 d . . . . .
 H13 H 0.3084 0.5109 0.6435 0.071 Uiso 1 1 calc R . . . .
 C14 C 0.2062(5) 0.3517(4) 0.67252(14) 0.0577(9) Uani 1 1 d . . . . .
 H14 H 0.1808 0.3876 0.7048 0.069 Uiso 1 1 calc R . . . .
 C15 C 0.1667(4) 0.2253(3) 0.66121(13) 0.0499(8) Uani 1 1 d . . . . .
 H15 H 0.1108 0.1765 0.6853 0.060 Uiso 1 1 calc R . . . .
 C16 C 0.2104(3) 0.1706(3) 0.61379(12) 0.0365(7) Uani 1 1 d . . . . .
 C17 C 0.1067(4) -0.0409(3) 0.62841(12) 0.0379(7) Uani 1 1 d . . . . .
 H17 H 0.1042 -0.0187 0.6643 0.046 Uiso 1 1 calc R . . . .
 C18 C 0.0456(3) -0.1663(3) 0.61248(12) 0.0361(6) Uani 1 1 d . . . . .
 C19 C 0.0302(3) -0.2096(3) 0.55788(12) 0.0343(6) Uani 1 1 d . . . . .
 C20 C -0.0398(4) -0.3334(3) 0.54678(13) 0.0412(7) Uani 1 1 d . . . . .
 H20 H -0.0484 -0.3642 0.5117 0.049 Uiso 1 1 calc R . . . .
 C21 C -0.0094(4) -0.2474(3) 0.65227(12) 0.0449(8) Uani 1 1 d . . . . .
 H21 H 0.0017 -0.2210 0.6879 0.054 Uiso 1 1 calc R . . . .
 C22 C -0.0790(4) -0.3648(3) 0.63883(14) 0.0480(8) Uani 1 1 d . . . . .
 C23 C -0.0951(4) -0.4087(3) 0.58636(14) 0.0474(8) Uani 1 1 d . . . . .
 H23 H -0.1432 -0.4888 0.5781 0.057 Uiso 1 1 calc R . . . .

loop_
  _atom_site_aniso_label
  _atom_site_aniso_U_11
  _atom_site_aniso_U_22
  _atom_site_aniso_U_33
  _atom_site_aniso_U_23
  _atom_site_aniso_U_13
  _atom_site_aniso_U_12
 Cu1 0.03422(19) 0.0333(2) 0.0318(2) 0.00066(17) 0.00614(14) -0.00781(15)
 F1 0.150(2) 0.0664(15) 0.0447(12) -0.0048(12) 0.0323(13) 0.0075(15)
 O1 0.0368(10) 0.0413(11) 0.0338(11) 0.0012(10) 0.0069(9) -0.0096(9)
 O2 0.0371(10) 0.0372(11) 0.0325(10) 0.0010(9) 0.0079(8) -0.0090(8)
 O3 0.168(3) 0.081(2) 0.0564(19) 0.0145(18) 0.042(2) -0.022(2)
 O4 0.137(3) 0.0623(19) 0.103(3) 0.0167(18) 0.050(2) -0.038(2)
 N1 0.0306(11) 0.0304(12) 0.0360(13) -0.0006(11) 0.0055(10) -0.0032(9)
 N2 0.0315(12) 0.0357(13) 0.0334(13) -0.0005(11) 0.0029(10) -0.0024(10)
 N3 0.090(2) 0.051(2) 0.066(2) 0.0144(18) 0.0363(19) -0.0063(17)
 C1 0.077(2) 0.049(2) 0.0331(17) 0.0022(16) 0.0101(16) 0.0117(18)
 C2 0.069(2) 0.056(2) 0.0394(18) 0.0146(17) 0.0201(16) 0.0009(17)
 C3 0.0508(18) 0.0413(17) 0.0397(17) 0.0050(15) 0.0111(14) -0.0035(14)
 C4 0.0331(14) 0.0360(16) 0.0356(15) 0.0083(13) 0.0062(12) 0.0062(12)
 C5 0.0543(18) 0.0425(18) 0.0375(17) 0.0052(15) 0.0107(14) -0.0061(14)
 C6 0.083(2) 0.0393(18) 0.047(2) -0.0003(17) 0.0083(18) -0.0047(17)
 C7 0.0315(14) 0.0348(16) 0.0357(15) 0.0077(13) 0.0053(12) 0.0044(11)
 C8 0.0355(14) 0.0361(16) 0.0436(17) 0.0055(14) 0.0136(13) -0.0026(12)
 C9 0.0338(14) 0.0265(14) 0.0489(18) 0.0030(14) 0.0070(13) -0.0006(11)
 C10 0.0509(19) 0.0376(18) 0.080(3) -0.0101(19) 0.0252(18) -0.0105(14)
 C11 0.0318(14) 0.0363(16) 0.0386(16) -0.0030(14) 0.0010(12) -0.0010(12)
 C12 0.0535(18) 0.0359(17) 0.056(2) -0.0027(16) 0.0113(16) -0.0028(14)
 C13 0.068(2) 0.0409(19) 0.069(2) -0.018(2) 0.0102(19) -0.0019(17)
 C14 0.066(2) 0.059(2) 0.048(2) -0.0200(19) 0.0078(17) 0.0023(18)
 C15 0.0542(19) 0.054(2) 0.0430(19) -0.0069(17) 0.0113(15) -0.0050(16)
 C16 0.0330(14) 0.0386(16) 0.0369(16) -0.0048(14) -0.0014(12) -0.0007(12)
 C17 0.0406(16) 0.0441(18) 0.0296(15) 0.0016(14) 0.0063(13) -0.0005(13)
 C18 0.0350(14) 0.0368(16) 0.0377(16) 0.0050(14) 0.0092(12) 0.0015(12)
 C19 0.0279(13) 0.0358(15) 0.0401(16) 0.0046(14) 0.0075(12) -0.0001(11)
 C20 0.0445(16) 0.0389(17) 0.0410(17) 0.0000(15) 0.0075(13) -0.0060(13)
 C21 0.0529(18) 0.0474(19) 0.0361(17) 0.0082(15) 0.0126(14) 0.0036(15)
 C22 0.0529(18) 0.0398(18) 0.054(2) 0.0147(17) 0.0181(16) -0.0010(15)
 C23 0.0510(18) 0.0350(17) 0.057(2) 0.0068(17) 0.0080(16) -0.0071(14)

_geom_special_details
;
 All esds (except the esd in the dihedral angle between two l.s. planes)
 are estimated using the full covariance matrix.  The cell esds are taken
 into account individually in the estimation of esds in distances, angles
 and torsion angles; correlations between esds in cell parameters are only
 used when they are defined by crystal symmetry.  An approximate (isotropic)
 treatment of cell esds is used for estimating esds involving l.s. planes.
;
loop_
  _geom_bond_atom_site_label_1
  _geom_bond_atom_site_label_2
  _geom_bond_distance
  _geom_bond_site_symmetry_2
  _geom_bond_publ_flag
 Cu1 O1 1.904(2) . ?
 Cu1 O2 1.935(2) . ?
 Cu1 N1 1.956(2) . ?
 Cu1 N2 1.951(3) . ?
 F1 C1 1.361(4) . ?
 O1 C7 1.282(3) . ?
 O2 C19 1.296(3) . ?
 O3 N3 1.217(4) . ?
 O4 N3 1.215(4) . ?
 N1 C9 1.330(4) . ?
 N1 C11 1.413(4) . ?
 N2 C16 1.419(4) . ?
 N2 C17 1.292(4) . ?
 N3 C22 1.468(4) . ?
 C1 C2 1.367(5) . ?
 C1 C6 1.364(5) . ?
 C2 H2 0.9300 . ?
 C2 C3 1.375(5) . ?
 C3 H3 0.9300 . ?
 C3 C4 1.398(4) . ?
 C4 C5 1.391(4) . ?
 C4 C7 1.496(4) . ?
 C5 H5 0.9300 . ?
 C5 C6 1.376(4) . ?
 C6 H6 0.9300 . ?
 C7 C8 1.401(4) . ?
 C8 H8 0.9300 . ?
 C8 C9 1.412(4) . ?
 C9 C10 1.519(4) . ?
 C10 H10A 0.9600 . ?
 C10 H10B 0.9600 . ?
 C10 H10C 0.9600 . ?
 C11 C12 1.393(4) . ?
 C11 C16 1.407(4) . ?
 C12 H12 0.9300 . ?
 C12 C13 1.378(5) . ?
 C13 H13 0.9300 . ?
 C13 C14 1.378(5) . ?
 C14 H14 0.9300 . ?
 C14 C15 1.375(5) . ?
 C15 H15 0.9300 . ?
 C15 C16 1.390(4) . ?
 C17 H17 0.9300 . ?
 C17 C18 1.433(4) . ?
 C18 C19 1.433(4) . ?
 C18 C21 1.406(4) . ?
 C19 C20 1.417(4) . ?
 C20 H20 0.9300 . ?
 C20 C23 1.367(4) . ?
 C21 H21 0.9300 . ?
 C21 C22 1.366(5) . ?
 C22 C23 1.384(5) . ?
 C23 H23 0.9300 . ?

loop_
  _geom_angle_atom_site_label_1
  _geom_angle_atom_site_label_2
  _geom_angle_atom_site_label_3
  _geom_angle
  _geom_angle_site_symmetry_1
  _geom_angle_site_symmetry_3
  _geom_angle_publ_flag
 O1 Cu1 O2 87.55(8) . . ?
 O1 Cu1 N1 95.18(9) . . ?
 O1 Cu1 N2 178.05(9) . . ?
 O2 Cu1 N1 177.21(9) . . ?
 O2 Cu1 N2 92.63(9) . . ?
 N2 Cu1 N1 84.62(10) . . ?
 C7 O1 Cu1 124.64(19) . . ?
 C19 O2 Cu1 126.84(18) . . ?
 C9 N1 Cu1 122.83(19) . . ?
 C9 N1 C11 126.1(2) . . ?
 C11 N1 Cu1 110.66(17) . . ?
 C16 N2 Cu1 110.96(19) . . ?
 C17 N2 Cu1 125.6(2) . . ?
 C17 N2 C16 123.5(3) . . ?
 O3 N3 C22 118.3(3) . . ?
 O4 N3 O3 123.7(3) . . ?
 O4 N3 C22 117.9(4) . . ?
 F1 C1 C2 118.7(3) . . ?
 F1 C1 C6 118.5(3) . . ?
 C6 C1 C2 122.8(3) . . ?
 C1 C2 H2 120.9 . . ?
 C1 C2 C3 118.3(3) . . ?
 C3 C2 H2 120.9 . . ?
 C2 C3 H3 119.3 . . ?
 C2 C3 C4 121.3(3) . . ?
 C4 C3 H3 119.3 . . ?
 C3 C4 C7 123.9(3) . . ?
 C5 C4 C3 117.7(3) . . ?
 C5 C4 C7 118.4(3) . . ?
 C4 C5 H5 119.3 . . ?
 C6 C5 C4 121.4(3) . . ?
 C6 C5 H5 119.3 . . ?
 C1 C6 C5 118.4(3) . . ?
 C1 C6 H6 120.8 . . ?
 C5 C6 H6 120.8 . . ?
 O1 C7 C4 114.3(2) . . ?
 O1 C7 C8 125.0(3) . . ?
 C8 C7 C4 120.6(3) . . ?
 C7 C8 H8 116.4 . . ?
 C7 C8 C9 127.2(3) . . ?
 C9 C8 H8 116.4 . . ?
 N1 C9 C8 122.0(3) . . ?
 N1 C9 C10 123.0(3) . . ?
 C8 C9 C10 115.0(3) . . ?
 C9 C10 H10A 109.5 . . ?
 C9 C10 H10B 109.5 . . ?
 C9 C10 H10C 109.5 . . ?
 H10A C10 H10B 109.5 . . ?
 H10A C10 H10C 109.5 . . ?
 H10B C10 H10C 109.5 . . ?
 C12 C11 N1 126.3(3) . . ?
 C12 C11 C16 117.7(3) . . ?
 C16 C11 N1 115.7(3) . . ?
 C11 C12 H12 119.6 . . ?
 C13 C12 C11 120.8(3) . . ?
 C13 C12 H12 119.6 . . ?
 C12 C13 H13 119.7 . . ?
 C14 C13 C12 120.7(3) . . ?
 C14 C13 H13 119.7 . . ?
 C13 C14 H14 120.0 . . ?
 C15 C14 C13 119.9(3) . . ?
 C15 C14 H14 120.0 . . ?
 C14 C15 H15 120.0 . . ?
 C14 C15 C16 120.0(3) . . ?
 C16 C15 H15 120.0 . . ?
 C11 C16 N2 115.4(3) . . ?
 C15 C16 N2 123.8(3) . . ?
 C15 C16 C11 120.7(3) . . ?
 N2 C17 H17 117.2 . . ?
 N2 C17 C18 125.6(3) . . ?
 C18 C17 H17 117.2 . . ?
 C19 C18 C17 123.0(3) . . ?
 C21 C18 C17 117.8(3) . . ?
 C21 C18 C19 119.0(3) . . ?
 O2 C19 C18 124.2(3) . . ?
 O2 C19 C20 118.0(3) . . ?
 C20 C19 C18 117.8(3) . . ?
 C19 C20 H20 119.2 . . ?
 C23 C20 C19 121.6(3) . . ?
 C23 C20 H20 119.2 . . ?
 C18 C21 H21 119.8 . . ?
 C22 C21 C18 120.4(3) . . ?
 C22 C21 H21 119.8 . . ?
 C21 C22 N3 119.3(3) . . ?
 C21 C22 C23 121.7(3) . . ?
 C23 C22 N3 119.0(3) . . ?
 C20 C23 C22 119.6(3) . . ?
 C20 C23 H23 120.2 . . ?
 C22 C23 H23 120.2 . . ?

loop_
  _geom_torsion_atom_site_label_1
  _geom_torsion_atom_site_label_2
  _geom_torsion_atom_site_label_3
  _geom_torsion_atom_site_label_4
  _geom_torsion
  _geom_torsion_site_symmetry_1
  _geom_torsion_site_symmetry_2
  _geom_torsion_site_symmetry_3
  _geom_torsion_site_symmetry_4
  _geom_torsion_publ_flag
 Cu1 O1 C7 C4 176.31(16) . . . . ?
 Cu1 O1 C7 C8 -1.8(4) . . . . ?
 Cu1 O2 C19 C18 10.8(4) . . . . ?
 Cu1 O2 C19 C20 -170.07(19) . . . . ?
 Cu1 N1 C9 C8 16.8(4) . . . . ?
 Cu1 N1 C9 C10 -160.7(2) . . . . ?
 Cu1 N1 C11 C12 -160.6(3) . . . . ?
 Cu1 N1 C11 C16 13.1(3) . . . . ?
 Cu1 N2 C16 C11 -9.6(3) . . . . ?
 Cu1 N2 C16 C15 167.2(2) . . . . ?
 Cu1 N2 C17 C18 -5.8(4) . . . . ?
 F1 C1 C2 C3 -179.6(3) . . . . ?
 F1 C1 C6 C5 178.7(3) . . . . ?
 O1 C7 C8 C9 -7.2(5) . . . . ?
 O2 C19 C20 C23 -177.7(3) . . . . ?
 O3 N3 C22 C21 -14.0(5) . . . . ?
 O3 N3 C22 C23 165.7(4) . . . . ?
 O4 N3 C22 C21 168.3(4) . . . . ?
 O4 N3 C22 C23 -12.0(5) . . . . ?
 N1 C11 C12 C13 179.8(3) . . . . ?
 N1 C11 C16 N2 -2.4(4) . . . . ?
 N1 C11 C16 C15 -179.3(3) . . . . ?
 N2 C17 C18 C19 -4.8(5) . . . . ?
 N2 C17 C18 C21 178.5(3) . . . . ?
 N3 C22 C23 C20 -179.5(3) . . . . ?
 C1 C2 C3 C4 1.3(5) . . . . ?
 C2 C1 C6 C5 -1.9(6) . . . . ?
 C2 C3 C4 C5 -2.6(5) . . . . ?
 C2 C3 C4 C7 176.1(3) . . . . ?
 C3 C4 C5 C6 1.7(5) . . . . ?
 C3 C4 C7 O1 165.9(3) . . . . ?
 C3 C4 C7 C8 -15.9(4) . . . . ?
 C4 C5 C6 C1 0.5(5) . . . . ?
 C4 C7 C8 C9 174.8(3) . . . . ?
 C5 C4 C7 O1 -15.4(4) . . . . ?
 C5 C4 C7 C8 162.9(3) . . . . ?
 C6 C1 C2 C3 1.0(6) . . . . ?
 C7 C4 C5 C6 -177.1(3) . . . . ?
 C7 C8 C9 N1 -1.4(5) . . . . ?
 C7 C8 C9 C10 176.3(3) . . . . ?
 C9 N1 C11 C12 26.7(4) . . . . ?
 C9 N1 C11 C16 -159.6(3) . . . . ?
 C11 N1 C9 C8 -171.3(3) . . . . ?
 C11 N1 C9 C10 11.1(4) . . . . ?
 C11 C12 C13 C14 -3.2(5) . . . . ?
 C12 C11 C16 N2 171.9(3) . . . . ?
 C12 C11 C16 C15 -5.0(4) . . . . ?
 C12 C13 C14 C15 -1.1(6) . . . . ?
 C13 C14 C15 C16 2.3(5) . . . . ?
 C14 C15 C16 N2 -175.7(3) . . . . ?
 C14 C15 C16 C11 0.9(5) . . . . ?
 C16 N2 C17 C18 174.5(3) . . . . ?
 C16 C11 C12 C13 6.2(5) . . . . ?
 C17 N2 C16 C11 170.1(3) . . . . ?
 C17 N2 C16 C15 -13.1(4) . . . . ?
 C17 C18 C19 O2 2.2(4) . . . . ?
 C17 C18 C19 C20 -176.9(3) . . . . ?
 C17 C18 C21 C22 175.8(3) . . . . ?
 C18 C19 C20 C23 1.5(4) . . . . ?
 C18 C21 C22 N3 -179.3(3) . . . . ?
 C18 C21 C22 C23 1.1(5) . . . . ?
 C19 C18 C21 C22 -1.0(4) . . . . ?
 C19 C20 C23 C22 -1.5(5) . . . . ?
 C21 C18 C19 O2 178.9(3) . . . . ?
 C21 C18 C19 C20 -0.3(4) . . . . ?
 C21 C22 C23 C20 0.2(5) . . . . ?

_iucr_refine_instructions_details
;
TITL
CELL 0.71073 7.7863 10.42 25.0339 90 95.857 90
ZERR 4 0.0042 0.0056 0.0126 0 0.02 0
LATT 1
SYMM -X,0.5+Y,0.5-Z
SFAC C H Cu F N O
UNIT 92 64 4 4 12 16
EQIV $1 1-X,0.5+Y,0.5-Z
EQIV $2 -X,-1-Y,1-Z
EQIV $3 1-X,-Y,1-Z
EQIV $4 +X,0.5-Y,0.5+Z
EQIV $5 +X,1+Y,+Z
EQIV $6 -X,0.5+Y,1.5-Z
 
L.S. 20
PLAN  5
TEMP 23
HTAB C3 F1_$1
HTAB C6 O4_$2
HTAB C10 O2_$3
HTAB C13 F1_$4
HTAB C14 O3_$5
HTAB C15 O3_$6
MORE -1
BOND $H
CONF
fmap 2
acta 52
REM <olex2.extras>
REM <HklSrc "%.\\MF_JC_JC016py_abs.hkl">
REM </olex2.extras>
 
WGHT    0.055000    0.649000
FVAR       0.39454
CU1   3    0.203307    0.016918    0.522207    11.00000    0.03422    0.03332 =
         0.03179    0.00066    0.00614   -0.00781
F1    4    0.441094   -0.149287    0.221812    11.00000    0.14970    0.06637 =
         0.04471   -0.00479    0.03226    0.00753
O1    6    0.248193   -0.011980    0.449844    11.00000    0.03679    0.04127 =
         0.03383    0.00120    0.00694   -0.00962
O2    6    0.074362   -0.142108    0.517997    11.00000    0.03706    0.03720 =
         0.03252    0.00100    0.00790   -0.00904
O3    6   -0.092494   -0.419815    0.727650    11.00000    0.16752    0.08125 =
         0.05638    0.01454    0.04231   -0.02223
O4    6   -0.223481   -0.540806    0.667276    11.00000    0.13736    0.06227 =
         0.10254    0.01671    0.04963   -0.03825
N1    5    0.333020    0.177647    0.530239    11.00000    0.03056    0.03041 =
         0.03600   -0.00060    0.00548   -0.00318
N2    5    0.164871    0.043846    0.597169    11.00000    0.03150    0.03569 =
         0.03341   -0.00055    0.00287   -0.00239
N3    5   -0.137399   -0.446995    0.681043    11.00000    0.09038    0.05104 =
         0.06619    0.01444    0.03634   -0.00628
C1    1    0.418991   -0.097955    0.270652    11.00000    0.07723    0.04881 =
         0.03314    0.00221    0.01008    0.01171
C2    1    0.486065    0.020809    0.283072    11.00000    0.06870    0.05553 =
         0.03943    0.01460    0.02006    0.00089
AFIX  43
H2    2    0.545042    0.066113    0.258647    11.00000   -1.20000
AFIX   0
C3    1    0.464088    0.071601    0.332631    11.00000    0.05078    0.04134 =
         0.03972    0.00498    0.01111   -0.00349
AFIX  43
H3    2    0.506895    0.153056    0.341417    11.00000   -1.20000
AFIX   0
C4    1    0.378726    0.003269    0.370049    11.00000    0.03310    0.03602 =
         0.03558    0.00829    0.00619    0.00617
C5    1    0.310154   -0.115992    0.354670    11.00000    0.05431    0.04247 =
         0.03751    0.00516    0.01074   -0.00607
AFIX  43
H5    2    0.250065   -0.162280    0.378516    11.00000   -1.20000
AFIX   0
C6    1    0.329399   -0.166898    0.304894    11.00000    0.08324    0.03931 =
         0.04667   -0.00030    0.00825   -0.00468
AFIX  43
H6    2    0.282415   -0.246423    0.294854    11.00000   -1.20000
AFIX   0
C7    1    0.360129    0.049653    0.425738    11.00000    0.03146    0.03485 =
         0.03565    0.00773    0.00533    0.00437
C8    1    0.463383    0.149895    0.448246    11.00000    0.03547    0.03610 =
         0.04362    0.00548    0.01365   -0.00262
AFIX  43
H8    2    0.548791    0.179920    0.428031    11.00000   -1.20000
AFIX   0
C9    1    0.452082    0.210379    0.498244    11.00000    0.03377    0.02650 =
         0.04893    0.00296    0.00701   -0.00059
C10   1    0.589627    0.310966    0.513354    11.00000    0.05086    0.03765 =
         0.07990   -0.01006    0.02519   -0.01050
AFIX 137
H10A  2    0.556399    0.390616    0.495998    11.00000   -1.50000
H10B  2    0.697648    0.282930    0.502040    11.00000   -1.50000
H10C  2    0.601789    0.322942    0.551576    11.00000   -1.50000
AFIX   0
C11   1    0.297081    0.242744    0.577347    11.00000    0.03179    0.03633 =
         0.03863   -0.00303    0.00097   -0.00103
C12   1    0.324867    0.372519    0.588380    11.00000    0.05346    0.03585 =
         0.05607   -0.00274    0.01131   -0.00279
AFIX  43
H12   2    0.371780    0.424355    0.563339    11.00000   -1.20000
AFIX   0
C13   1    0.283677    0.425048    0.635963    11.00000    0.06813    0.04087 =
         0.06934   -0.01787    0.01016   -0.00192
AFIX  43
H13   2    0.308399    0.510881    0.643469    11.00000   -1.20000
AFIX   0
C14   1    0.206248    0.351687    0.672522    11.00000    0.06612    0.05905 =
         0.04838   -0.02000    0.00779    0.00228
AFIX  43
H14   2    0.180767    0.387572    0.704801    11.00000   -1.20000
AFIX   0
C15   1    0.166701    0.225338    0.661214    11.00000    0.05424    0.05363 =
         0.04301   -0.00689    0.01134   -0.00501
AFIX  43
H15   2    0.110779    0.176509    0.685277    11.00000   -1.20000
AFIX   0
C16   1    0.210363    0.170622    0.613785    11.00000    0.03297    0.03863 =
         0.03690   -0.00485   -0.00143   -0.00067
C17   1    0.106679   -0.040939    0.628406    11.00000    0.04060    0.04413 =
         0.02960    0.00157    0.00635   -0.00045
AFIX  43
H17   2    0.104200   -0.018676    0.664294    11.00000   -1.20000
AFIX   0
C18   1    0.045633   -0.166342    0.612480    11.00000    0.03499    0.03683 =
         0.03770    0.00498    0.00919    0.00146
C19   1    0.030236   -0.209561    0.557875    11.00000    0.02788    0.03576 =
         0.04010    0.00460    0.00754   -0.00006
C20   1   -0.039838   -0.333406    0.546783    11.00000    0.04453    0.03886 =
         0.04096    0.00002    0.00752   -0.00605
AFIX  43
H20   2   -0.048422   -0.364194    0.511742    11.00000   -1.20000
AFIX   0
C21   1   -0.009389   -0.247396    0.652268    11.00000    0.05289    0.04737 =
         0.03609    0.00825    0.01260    0.00357
AFIX  43
H21   2    0.001667   -0.220958    0.687936    11.00000   -1.20000
AFIX   0
C22   1   -0.078999   -0.364771    0.638828    11.00000    0.05291    0.03978 =
         0.05388    0.01473    0.01808   -0.00102
C23   1   -0.095108   -0.408679    0.586360    11.00000    0.05096    0.03496 =
         0.05674    0.00682    0.00796   -0.00706
AFIX  43
H23   2   -0.143203   -0.488838    0.578092    11.00000   -1.20000
AFIX   0
HKLF 4
 
REM
REM R1 =  0.0420 for    3029 Fo > 4sig(Fo)  and  0.0683 for all    4037 data
REM    290 parameters refined using      0 restraints
 
END  
     
WGHT      0.0546      0.6490 

REM Highest difference peak  0.402,  deepest hole -0.350,  1-sigma level  0.072
Q1    1   0.1692  0.0998  0.5156  11.00000  0.05    0.40
Q2    1   0.2297  0.0230  0.5619  11.00000  0.05    0.40
Q3    1   0.1778  0.0147  0.4834  11.00000  0.05    0.38
Q4    1   0.2777  0.2020  0.6011  11.00000  0.05    0.34
Q5    1   0.0932 -0.0653  0.5124  11.00000  0.05    0.33

  REM The information below was added by Olex2.
  REM
  REM R1 = 0.0420 for 3029 Fo > 4sig(Fo) and 0.0683 for all 20237 data
  REM n/a parameters refined using n/a restraints
  REM Highest difference peak 0.40, deepest hole -0.35
  REM Mean Shift 0, Max Shift 0.001.
  
  REM +++ Tabular Listing of Refinement Information +++
  REM R1_all = 0.0683
  REM R1_gt = 0.0420
  REM wR_ref = 0.1046
  REM GOOF = 1.032
  REM Shift_max = 0.001
  REM Shift_mean = 0
  REM Reflections_all = 20237
  REM Reflections_gt = 3029
  REM Parameters = n/a
  REM Hole = -0.35
  REM Peak = 0.40
  REM Flack = n/a
  
  
;
_olex2_submission_special_instructions 'No special instructions were received'
loop_
  _refln_index_h
  _refln_index_k
  _refln_index_l
  _refln_F_squared_meas
  _refln_F_squared_sigma
  _refln_scale_group_code
 -1 0 0 274.933 5.28199 3
 1 0 0 275.375 5.27555 3
 2 0 0 392.947 7.84798 3
 2 0 0 380.945 8.94547 1
 3 0 0 476.412 9.87947 3
 3 0 0 476.989 11.2892 1
 4 0 0 135.974 5.24959 3
 -4 0 0 136.628 5.97255 3
 4 0 0 139.468 5.81367 1
 -5 0 0 261.704 8.74819 3
 5 0 0 258.599 8.03074 3
 5 0 0 270.673 9.03488 1
 -6 0 0 20.4186 4.97678 3
 6 0 0 21.6831 4.14501 1
 6 0 0 17.2184 3.60192 3
 -6 0 0 11.3157 4.00184 2
 -7 0 0 226.167 10.973 2
 7 0 0 228.095 9.6824 3
 -7 0 0 225.071 11.5397 3
 7 0 0 191.144 10.5367 1
 -8 0 0 118.76 11.5708 2
 8 0 0 119.659 10.5731 3
 8 0 0 119.468 11.6556 1
 -8 0 0 146.321 12.664 3
 -9 0 0 22.4443 10.7677 3
 9 0 0 21.3046 7.96583 3
 -9 0 0 8.24282 8.46216 2
 9 0 0 11.983 9.13541 1
 -1 -1 0 1349.29 24.8569 2
 -1 -1 0 1339.48 26.0181 1
 1 -1 0 1353.57 22.8717 3
 1 1 0 1317.44 26.0099 1
 1 1 0 1345.43 24.8571 2
 -1 1 0 1359.87 22.873 3
 -2 -1 0 428.297 10.1049 1
 -2 -1 0 451.781 8.71364 3
 2 -1 0 428.561 8.76924 3
 -2 -1 0 433.522 9.31347 2
 -2 1 0 434.405 8.79267 3
 2 1 0 427.233 8.53383 3
 2 1 0 419.233 9.9999 1
 -3 -1 0 140.266 5.1012 2
 -3 -1 0 142.081 5.76897 1
 3 -1 0 147.332 5.30494 1
 -3 -1 0 153.867 5.12385 3
 3 -1 0 159.619 4.97924 3
 3 1 0 146.474 5.588 1
 -3 1 0 154.789 5.32949 3
 3 1 0 155.602 4.83024 3
 -4 -1 0 53.9543 4.41943 2
 -4 -1 0 50.8989 4.74322 3
 4 -1 0 49.5093 4.40799 1
 4 -1 0 59.6375 4.1524 3
 -4 1 0 50.1952 4.87043 3
 4 1 0 55.3361 3.99824 3
 4 1 0 50.6304 4.59685 1
 -5 -1 0 33.5714 4.42489 3
 5 -1 0 40.5112 3.80198 3
 -5 -1 0 32.5703 3.75008 2
 5 -1 0 40.9551 4.10982 1
 5 1 0 37.6338 3.72029 3
 5 1 0 32.2752 3.74713 1
 -5 1 0 31.8875 4.35043 3
 6 -1 0 6.81495 3.76175 1
 -6 -1 0 7.05365 4.76532 3
 -6 -1 0 8.96466 3.66102 2
 6 -1 0 15.1215 3.37401 3
 6 1 0 2.76002 3.47189 1
 -6 1 0 10.8321 4.86248 3
 6 1 0 12.8299 3.65437 3
 -7 -1 0 62.6356 7.49485 3
 -7 -1 0 43.5882 6.13938 2
 7 -1 0 55.2236 6.52772 1
 7 -1 0 61.5592 6.19239 3
 -7 1 0 59.3628 7.39719 3
 7 1 0 57.9911 5.76681 3
 7 1 0 52.5569 6.34294 1
 -8 -1 0 32.5504 8.38312 3
 -8 -1 0 18.9826 7.19822 2
 8 -1 0 29.5647 6.08787 3
 8 -1 0 12.3615 6.83991 1
 8 1 0 26.8317 6.69197 1
 -8 1 0 17.5427 6.81092 2
 -8 1 0 26.6649 8.11433 3
 9 -1 0 1.19893 7.61437 3
 -9 -1 0 -7.6003 9.44659 2
 -9 -1 0 6.04844 10.8641 3
 9 -1 0 -9.4206 8.67715 1
 9 1 0 -2.3018 8.4661 1
 -9 1 0 -4.5821 10.1244 3
 -9 1 0 -6.0911 7.90313 2
 0 -2 0 2435.44 97.8893 4
 0 -2 0 2469.44 46.3013 1
 0 2 0 2455.19 46.3006 1
 -1 -2 0 15.4225 8.44372 4
 -1 -2 0 12.8999 1.52813 2
 -1 -2 0 14.8294 2.03763 1
 1 -2 0 12.7069 1.82954 3
 1 2 0 9.77199 1.80361 1
 1 2 0 11.1326 1.57546 2
 -2 -2 0 2559.36 118.387 4
 -2 -2 0 2848.7 51.7778 2
 -2 -2 0 2834.83 54.1847 1
 2 -2 0 2854.78 47.6093 3
 2 2 0 2885.7 54.2232 1
 -2 2 0 2846.05 47.6188 3
 2 2 0 2846.75 51.7727 2
 -3 -2 0 2314.46 39.5824 3
 3 -2 0 2270.93 39.7584 3
 -3 -2 0 2298.7 45.4042 1
 -3 -2 0 2327.91 43.226 2
 -3 2 0 2273.4 39.8093 3
 3 2 0 2293.8 45.3279 1
 4 -2 0 1.97744 2.53446 3
 -4 -2 0 1.93559 2.67495 3
 -4 -2 0 1.77372 2.4974 2
 4 -2 0 0.44355 2.26296 1
 -4 -2 0 -0.7536 2.73542 1
 4 2 0 -0.8818 2.48396 1
 -4 2 0 3.91243 3.0348 3
 5 -2 0 237.573 7.803 3
 -5 -2 0 248.528 8.54011 2
 -5 -2 0 238.487 8.36752 3
 5 -2 0 234.24 8.65172 1
 -5 2 0 238.546 8.85567 3
 5 2 0 235.665 8.88495 1
 -6 -2 0 3.57079 4.67455 3
 6 -2 0 0.83035 3.59614 1
 -6 -2 0 2.38299 3.86897 2
 6 -2 0 2.77476 3.15441 3
 -6 2 0 7.92022 4.72735 3
 6 2 0 4.27129 3.66248 1
 7 -2 0 222.958 11.2277 1
 -7 -2 0 245.644 11.8019 2
 7 -2 0 228.693 9.74483 3
 -7 -2 0 218.146 11.5779 3
 -7 2 0 222.278 11.8212 3
 7 2 0 231.669 10.8561 1
 -8 -2 0 8.61686 7.27624 2
 8 -2 0 -3.6445 6.0224 1
 8 -2 0 -5.6699 5.56516 3
 -8 -2 0 16.2001 8.3986 3
 -8 2 0 -1.6556 7.7119 3
 8 2 0 -0.4665 6.50439 1
 9 -2 0 10.0151 7.6668 3
 -9 -2 0 10.0506 9.70785 2
 -9 -2 0 5.62057 11.0884 3
 9 -2 0 0.52177 8.87446 1
 -9 2 0 5.10092 11.1709 3
 9 2 0 7.19835 8.75347 1
 -9 2 0 3.86655 8.23993 2
 0 -3 0 -1.7635 8.0064 4
 0 -3 0 -1.1298 1.41094 1
 0 3 0 -3.3197 1.23601 1
 1 -3 0 319.384 7.2303 3
 -1 -3 0 334.545 8.15107 1
 -1 -3 0 310.938 7.28679 2
 -1 -3 0 359.206 19.7563 4
 1 3 0 309.195 20.1426 4
 1 3 0 335.742 8.07883 1
 1 3 0 322.827 7.38142 2
 2 -3 0 321.794 7.64792 3
 -2 -3 0 320.694 7.52341 2
 -2 -3 0 317.404 8.63758 1
 2 3 0 319.898 8.51326 1
 2 3 0 314.035 7.602 2
 -2 3 0 323.862 7.79559 3
 -3 -3 0 32.8682 3.61419 2
 3 -3 0 38.1545 3.28755 3
 -3 -3 0 34.3758 2.97962 3
 -3 -3 0 30.7988 3.34209 1
 3 3 0 35.9561 3.55436 1
 -3 3 0 33.9321 3.37653 3
 3 3 0 37.573 3.9406 2
 4 -3 0 16.6132 3.36323 3
 -4 -3 0 24.1167 3.37182 3
 -4 -3 0 27.3372 4.05763 1
 -4 -3 0 22.6181 3.02241 2
 4 3 0 23.5772 3.3324 1
 -4 3 0 19.9045 3.63319 3
 5 -3 0 21.03 3.88876 3
 -5 -3 0 18.1943 3.89993 1
 -5 -3 0 24.242 4.08542 3
 -5 -3 0 25.9725 3.71187 2
 5 -3 0 22.6183 3.73556 1
 5 3 0 20.8617 3.85737 1
 -5 3 0 25.5089 4.384 3
 6 -3 0 55.6345 5.36412 1
 -6 -3 0 54.2073 5.4925 2
 6 -3 0 40.0216 4.58552 3
 -6 -3 0 55.8736 5.83787 3
 6 3 0 53.2569 5.49054 1
 -6 3 0 58.232 6.26833 3
 -7 -3 0 11.0567 5.64948 2
 -7 -3 0 7.84484 6.52411 3
 7 -3 0 5.73311 5.14274 1
 7 -3 0 4.57996 4.33471 3
 7 3 0 3.4053 4.48291 1
 -7 3 0 3.4397 6.09334 3
 8 -3 0 6.94007 5.54211 3
 -8 -3 0 2.34187 8.69649 3
 8 -3 0 -2.9176 6.42207 1
 -8 -3 0 5.91099 7.12145 2
 8 3 0 4.1082 5.96484 1
 -8 3 0 7.71353 8.29353 3
 9 -3 0 2.65841 7.94373 3
 9 -3 0 -16.853 8.83014 1
 -9 -3 0 21.5948 12.1106 3
 -9 -3 0 -4.5662 9.54625 2
 -9 3 0 12.4693 11.095 3
 9 3 0 1.29952 8.35225 1
 0 -4 0 297.26 18.7647 4
 0 -4 0 281.725 7.22902 1
 0 4 0 285.542 7.14058 1
 0 4 0 298.499 19.8272 4
 1 -4 0 95.894 3.59105 1
 -1 -4 0 93.7297 4.53275 1
 1 4 0 97.5008 15.5463 4
 1 4 0 94.3564 4.24549 1
 -1 4 0 110.919 15.2409 4
 1 4 0 99.1216 4.12258 2
 -2 -4 0 1461.94 28.4522 2
 -2 -4 0 1582.08 65.2133 4
 2 -4 0 1465.28 26.7342 3
 -2 -4 0 1442.78 30.1938 1
 2 4 0 1466.3 30.2401 1
 2 4 0 1482.75 28.5167 2
 -3 -4 0 474.243 11.0234 2
 3 -4 0 480.875 10.9447 3
 -3 -4 0 475.987 12.4886 1
 3 4 0 482.415 12.3377 1
 3 4 0 480.126 11.2165 2
 -3 4 0 462.523 11.2097 3
 -4 -4 0 203.012 8.5476 1
 -4 -4 0 199.803 6.96194 2
 -4 -4 0 208.329 7.38877 3
 4 -4 0 200.979 7.35564 3
 -4 4 0 196.716 8.04425 3
 4 4 0 207.822 8.0782 1
 5 -4 0 594.354 14.0861 3
 -5 -4 0 573.081 14.1026 3
 -5 -4 0 596.69 14.6043 2
 -5 -4 0 579.847 16.1397 1
 5 4 0 588.845 15.9653 1
 -5 4 0 573.965 14.5848 3
 6 -4 0 35.3658 5.13499 3
 6 -4 0 32.7958 4.88357 1
 -6 -4 0 35.1781 5.69303 3
 -6 -4 0 30.7853 5.04675 2
 6 4 0 44.4216 5.3316 1
 -6 4 0 27.8117 5.891 3
 7 -4 0 28.357 5.93872 1
 -7 -4 0 28.8635 6.05469 2
 7 -4 0 26.1729 5.29811 3
 -7 -4 0 24.1215 7.06348 3
 7 4 0 32.911 5.47017 1
 -7 4 0 26.9166 7.30116 3
 -8 -4 0 11.9835 9.28486 3
 8 -4 0 2.84265 5.80471 3
 8 -4 0 2.45307 7.26373 1
 -8 -4 0 0.35784 6.88871 2
 8 4 0 1.01515 5.50486 1
 -8 4 0 -1.0228 8.70372 3
 -9 -4 0 -10.972 12.2811 3
 -9 -4 0 -2.0093 9.99114 2
 9 -4 0 18.4015 8.33018 3
 9 -4 0 -0.9407 9.42917 1
 -9 4 0 14.9231 12.3548 3
 9 4 0 12.2893 8.27211 1
 0 -5 0 16.5296 11.6876 4
 1 -5 0 526.219 11.7265 1
 -1 -5 0 532.501 12.6482 1
 1 5 0 534.74 12.5231 1
 1 5 0 536.568 11.9791 2
 2 -5 0 16.4823 2.79278 3
 -2 -5 0 13.9975 2.41894 2
 -2 -5 0 21.1352 3.42947 1
 2 5 0 17.0735 2.8014 2
 2 5 0 17.8852 2.88553 1
 -3 -5 0 69.3957 4.41048 2
 3 -5 0 64.139 5.01076 3
 -3 -5 0 59.5516 5.77624 1
 3 5 0 59.9282 4.96612 2
 3 5 0 66.3925 4.99933 1
 -4 -5 0 71.1454 6.79089 1
 4 -5 0 68.7487 5.55089 3
 -4 -5 0 67.7674 5.17035 2
 4 5 0 79.4596 6.12193 1
 4 5 0 71.7338 6.28698 2
 -5 -5 0 15.5202 4.37128 3
 -5 -5 0 15.2062 3.88844 2
 5 -5 0 15.7414 4.20092 3
 -5 -5 0 9.87776 4.64475 1
 -5 5 0 11.4833 4.62182 3
 5 5 0 13.8724 3.69109 1
 -6 -5 0 7.97252 4.62972 2
 6 -5 0 7.80636 4.24714 1
 -6 -5 0 13.8298 5.58456 3
 6 -5 0 19.0303 4.39881 3
 -6 -5 0 11.2557 5.41463 1
 6 5 0 11.5268 4.17573 1
 -6 5 0 6.59567 5.58777 3
 -7 -5 0 34.6335 6.56522 2
 7 -5 0 37.545 6.34938 1
 7 -5 0 40.8949 6.06164 3
 -7 -5 0 40.3547 8.09475 3
 7 5 0 34.617 5.4479 1
 -7 5 0 30.1073 8.0004 3
 -8 -5 0 -0.3458 7.48295 2
 8 -5 0 -3.6413 7.22432 1
 -8 -5 0 5.60839 9.35897 3
 8 -5 0 5.85374 6.20413 3
 -8 5 0 7.12833 9.3357 3
 8 5 0 3.62556 5.89447 1
 0 -6 0 1553.31 67.2744 4
 0 -6 0 1432.25 29.9743 1
 0 6 0 1472.3 29.503 2
 -1 -6 0 7.104 2.98338 1
 -1 -6 0 38.2929 16.0422 4
 1 -6 0 7.13331 2.30158 1
 1 6 0 5.53869 2.43914 1
 1 6 0 8.25626 2.68228 2
 2 -6 0 235.923 6.83183 1
 2 -6 0 241.124 7.83233 3
 -2 -6 0 246.385 8.75131 1
 2 6 0 237.04 8.18308 1
 2 6 0 245.591 7.85564 2
 -3 -6 0 102.706 7.06954 1
 -3 -6 0 106.965 5.62171 2
 3 -6 0 100.756 6.05492 3
 3 6 0 104.388 6.05337 2
 3 6 0 95.8702 5.9997 1
 -4 -6 0 90.1138 5.9452 2
 4 -6 0 87.1671 6.30496 3
 -4 -6 0 97.4441 7.64568 1
 4 6 0 96.3398 7.33286 2
 4 6 0 85.5653 6.41298 1
 -5 -6 0 251.136 9.60086 2
 5 -6 0 259.512 9.80201 3
 -5 -6 0 252.873 10.8166 3
 -5 -6 0 256.164 11.5534 1
 5 6 0 232.516 10.1522 1
 -6 -6 0 2.90405 4.89714 1
 6 -6 0 1.48801 4.81757 3
 6 -6 0 4.67341 4.58157 1
 -6 -6 0 4.74087 6.18782 3
 -6 -6 0 -1.0391 4.85291 2
 6 6 0 6.0557 3.92391 1
 7 -6 0 211.092 11.8804 1
 7 -6 0 205.53 11.4678 3
 -7 -6 0 217.242 14.2202 3
 -7 -6 0 200.362 12.2147 2
 7 6 0 221.016 11.7517 1
 -7 6 0 206.426 14.9624 3
 8 -6 0 12.2003 8.10203 1
 8 -6 0 12.1262 6.58648 3
 -8 -6 0 22.7745 8.60264 2
 -8 -6 0 11.1009 10.592 3
 8 6 0 28.4591 6.77103 1
 -8 6 0 16.8058 10.1536 3
 0 -7 0 -1.9042 15.0575 4
 0 -7 0 -5.3913 2.78049 1
 0 7 0 -0.7019 2.99997 2
 -1 -7 0 130.384 6.98465 1
 1 -7 0 133.724 5.88511 1
 -1 -7 0 134.375 21.0819 4
 1 7 0 127.935 6.61439 2
 1 7 0 132.363 6.13237 1
 2 -7 0 24.2772 3.00243 1
 -2 -7 0 20.3995 4.27129 1
 2 -7 0 29.8203 4.17173 3
 2 7 0 21.8262 3.75392 1
 2 7 0 25.4424 3.92273 2
 -3 -7 0 55.8898 5.74513 2
 3 -7 0 57.5552 5.0542 3
 -3 -7 0 56.783 5.87921 1
 3 7 0 50.0444 4.94619 1
 3 7 0 56.363 5.09136 2
 -4 -7 0 266.446 11.4011 1
 4 -7 0 271.461 9.92605 3
 -4 -7 0 255.636 9.38151 2
 4 7 0 269.928 10.5724 1
 4 7 0 264.097 10.27 2
 -5 -7 0 25.0263 6.06562 1
 -5 -7 0 27.8037 6.11007 3
 5 -7 0 21.5341 5.06763 3
 -5 -7 0 25.0922 5.04568 2
 5 7 0 29.2904 6.11649 2
 5 7 0 26.957 5.11238 1
 -6 -7 0 83.2443 9.18318 2
 6 -7 0 86.067 7.72717 3
 -6 -7 0 81.8341 8.57883 3
 -6 -7 0 82.9409 8.44464 1
 6 7 0 97.7611 9.20191 1
 -7 -7 0 56.2495 7.75792 2
 7 -7 0 51.6041 7.66085 1
 7 -7 0 67.1303 7.80039 3
 -7 -7 0 60.5372 9.55655 3
 7 7 0 45.2406 7.00142 1
 -8 -7 0 27.6949 9.36089 2
 -8 -7 0 21.0192 12.2672 3
 8 -7 0 25.519 7.55299 3
 8 -7 0 8.63051 8.86855 1
 8 7 0 22.478 7.37615 1
 0 -8 0 88.4864 6.52853 1
 0 8 0 88.9251 7.19771 2
 1 -8 0 9.8606 3.42923 1
 -1 -8 0 6.92812 4.27339 1
 1 8 0 9.38375 3.97039 2
 1 8 0 12.0759 3.11814 1
 2 -8 0 138.586 7.73081 3
 -2 -8 0 129.443 8.6428 1
 2 -8 0 135.86 6.50204 1
 2 8 0 126.751 7.39425 1
 2 8 0 125.881 7.90976 2
 -3 -8 0 9.67241 5.29574 1
 3 -8 0 6.46493 4.19903 3
 3 -8 0 13.984 3.21015 1
 3 8 0 6.47572 3.92216 1
 3 8 0 10.5551 4.69874 2
 -4 -8 0 84.641 7.78379 2
 -4 -8 0 88.2359 8.13799 1
 4 -8 0 74.9948 6.92572 3
 4 8 0 62.7438 6.19809 1
 4 8 0 76.8142 6.77269 2
 -5 -8 0 24.0465 5.58785 2
 5 -8 0 25.7118 5.48387 3
 -5 -8 0 28.3419 7.39886 1
 5 8 0 32.8412 6.96037 2
 5 8 0 26.6117 5.76458 1
 -6 -8 0 14.1663 8.04248 3
 -6 -8 0 4.39012 6.01024 2
 6 -8 0 -6.3279 5.68998 3
 -6 -8 0 2.52721 7.23544 1
 6 8 0 -0.8403 5.86796 1
 7 -8 0 39.841 7.70319 3
 -7 -8 0 11.9343 10.395 3
 -7 -8 0 28.1399 8.61806 2
 7 -8 0 23.3692 7.77102 1
 7 8 0 28.6864 7.37626 1
 0 -9 0 2.33319 4.43417 1
 0 9 0 0.99995 4.67484 2
 1 -9 0 89.3749 7.32771 1
 -1 -9 0 97.3507 8.74446 1
 1 9 0 91.6618 8.37511 2
 2 -9 0 20.9224 4.26805 1
 2 -9 0 17.1576 4.91838 3
 -2 -9 0 14.7288 5.75062 1
 2 9 0 15.448 5.13628 2
 2 9 0 13.8909 4.21105 1
 3 -9 0 27.5887 5.62217 3
 -3 -9 0 40.0362 7.08365 1
 3 -9 0 39.7132 4.65649 1
 3 9 0 32.4613 5.58543 1
 3 9 0 43.472 6.16216 2
 4 -9 0 144.759 10.3722 3
 -4 -9 0 136.685 12.2017 1
 4 -9 0 150.71 7.73011 1
 4 9 0 122.478 10.0761 1
 4 9 0 125.139 10.8545 2
 -5 -9 0 11.0735 5.88551 2
 5 -9 0 12.8678 6.09531 3
 -5 -9 0 8.33501 8.23112 1
 5 9 0 -0.3114 5.85616 1
 5 9 0 19.3806 7.72008 2
 6 -9 0 85.335 8.91467 3
 -6 -9 0 58.3286 8.43724 2
 -6 -9 0 69.4454 10.9479 3
 -6 -9 0 84.8746 11.4178 1
 6 9 0 80.651 9.55388 1
 0 -10 0 2.05564 5.39034 1
 0 10 0 7.14969 5.46469 2
 1 -10 0 19.1086 5.29674 1
 -1 -10 0 26.7305 6.75048 1
 -1 10 0 11.1035 5.99722 2
 1 10 0 17.4757 5.76557 2
 -2 -10 0 30.1272 7.30038 1
 2 -10 0 29.7501 6.07299 3
 2 -10 0 32.2938 5.30832 1
 2 10 0 28.6066 6.39055 2
 2 10 0 29.323 5.40628 1
 3 -10 0 0.27317 6.22118 3
 3 -10 0 5.62575 4.75058 1
 -3 -10 0 8.57466 6.83423 1
 3 10 0 7.13928 6.61927 2
 3 10 0 2.54791 5.12377 1
 -4 -10 0 7.53314 8.06088 1
 4 -10 0 9.89857 5.12744 1
 4 -10 0 10.7228 6.96007 3
 4 10 0 2.77977 5.95926 1
 4 10 0 6.74852 7.35014 2
 5 -10 0 43.1344 6.11713 1
 -5 -10 0 29.8286 10.0448 1
 5 -10 0 47.3583 8.21997 3
 5 10 0 56.0355 9.77965 2
 5 10 0 30.1332 7.90308 1
 6 -10 0 4.46735 6.30114 1
 -6 -10 0 10.7215 11.0714 1
 6 -10 0 -2.5334 8.67974 3
 -6 -10 0 9.99049 11.797 3
 6 10 0 6.688 8.88782 1
 0 -11 0 -1.3989 6.67642 1
 0 11 0 1.44457 6.60544 2
 1 -11 0 17.4617 6.54834 1
 1 -11 0 7.87784 6.62175 3
 -1 -11 0 26.2932 7.81424 1
 -1 11 0 22.0919 7.20177 2
 1 11 0 19.177 6.9772 2
 2 -11 0 27.4329 6.42073 1
 2 -11 0 28.5566 7.30785 3
 -2 -11 0 32.1268 8.63043 1
 2 11 0 23.6921 7.68188 2
 3 -11 0 6.29262 7.72946 3
 3 -11 0 4.36243 5.78354 1
 -3 -11 0 9.79808 9.03242 1
 3 11 0 2.62606 6.30872 1
 3 11 0 8.8114 7.94396 2
 -4 -11 0 82.3848 11.6767 1
 4 -11 0 73.5872 10.1795 3
 4 -11 0 70.2594 7.08265 1
 4 11 0 76.7312 10.2326 2
 4 11 0 77.4247 9.06743 1
 5 -11 0 7.20922 6.47882 1
 -5 -11 0 -1.1416 11.1585 1
 5 -11 0 4.59585 9.67296 3
 5 11 0 -14.301 8.42815 1
 5 11 0 13.8427 11.0877 2
 0 -12 0 46.2525 9.13238 1
 0 12 0 21.5468 8.71648 2
 1 -12 0 8.33752 7.9337 1
 1 -12 0 1.58616 7.91208 3
 -1 -12 0 -15.623 8.79114 1
 -1 12 0 -1.6152 8.75026 2
 1 12 0 -3.2015 8.08318 2
 2 -12 0 10.8197 8.2808 3
 2 -12 0 13.3576 7.53191 1
 -2 -12 0 2.8491 9.34409 1
 2 12 0 0.99387 8.82017 2
 -2 12 0 13.1944 9.45187 2
 3 -12 0 -11.768 9.21131 3
 3 -12 0 -2.1752 7.51292 1
 -3 -12 0 15.1219 10.6 1
 3 12 0 5.09854 7.43515 1
 3 12 0 1.64558 9.88295 2
 0 -13 0 -5.2482 10.5193 1
 0 13 0 -2.6781 10.8753 2
 -9 0 1 2.35432 10.1501 3
 9 0 -1 7.74673 7.72351 3
 -9 0 1 -8.453 8.30204 2
 9 0 -1 -9.5661 8.26963 1
 8 0 -1 -14.77 5.1728 1
 -8 0 1 0.68705 7.27229 3
 -8 0 1 -8.036 6.10464 2
 8 0 -1 3.17453 5.86267 3
 7 0 -1 -3.8311 4.55252 1
 -7 0 1 -1.3439 4.37075 2
 -7 0 1 8.77434 5.90165 3
 7 0 -1 -4.4934 3.99061 3
 6 0 -1 3.38134 3.23816 1
 -6 0 1 -3.6588 4.47862 3
 6 0 -1 -2.1196 2.84707 3
 -6 0 1 -1.6843 3.58651 2
 -5 0 1 4.77717 3.74131 3
 5 0 -1 -0.2947 2.41995 1
 5 0 -1 1.32155 2.64827 3
 -4 0 1 4.93028 2.91766 3
 4 0 -1 1.90894 1.92196 3
 4 0 -1 -2.001 2.15592 1
 3 0 -1 1.621 1.65399 3
 3 0 -1 0.25119 1.95843 1
 -3 0 1 -0.8199 2.20041 3
 -2 0 1 -1.3413 1.70388 3
 2 0 -1 -0.008 1.53843 1
 2 0 -1 -1.2327 1.35891 3
 1 0 -1 -0.7297 0.86648 3
 -1 0 1 0.23726 0.90919 3
 1 0 1 -2.3992 1.13138 1
 -1 0 -1 -3.5767 0.8612 3
 1 0 1 -3.6703 0.98732 3
 -1 0 -1 -0.7014 0.99083 1
 -2 0 -1 -0.7518 1.79019 1
 -2 0 -1 -3.0698 1.65875 3
 2 0 1 -2.3545 1.61437 1
 2 0 1 -0.4719 1.41461 3
 3 0 1 1.45183 1.77836 3
 -3 0 -1 -1.28 2.47035 3
 3 0 1 1.30699 1.99445 1
 4 0 1 -0.2155 2.0816 3
 4 0 1 1.4702 2.37562 1
 -4 0 -1 2.34798 2.9061 3
 5 0 1 -1.003 2.52327 3
 -5 0 -1 2.95013 3.70143 3
 5 0 1 -0.1822 2.68734 1
 -6 0 -1 1.82717 4.94218 3
 6 0 1 -1.0111 3.24586 1
 6 0 1 0.78118 3.08966 3
 7 0 1 0.66958 3.95553 3
 -7 0 -1 1.80856 5.89055 3
 7 0 1 -9.3339 4.82884 1
 -7 0 -1 -0.886 4.84552 2
 8 0 1 -12.46 6.03139 1
 8 0 1 -5.5164 5.37607 3
 -8 0 -1 -3.9334 6.15986 2
 -8 0 -1 11.4421 7.98597 3
 9 0 1 4.15369 9.06422 1
 -9 0 -1 -1.3511 10.8148 3
 9 0 1 8.28367 7.41953 3
 -9 0 -1 -6.5565 8.81975 2
 -9 -1 1 -0.9374 10.1839 3
 9 -1 -1 -12.269 8.65335 1
 -9 -1 1 5.02429 9.01636 2
 9 -1 -1 -13.2 7.34918 3
 -9 1 1 -17.262 7.67456 2
 -9 1 1 3.17958 10.421 3
 9 1 -1 2.67646 8.32217 1
 -8 -1 1 38.0507 8.72398 3
 8 -1 -1 35.4797 6.97746 1
 8 -1 -1 27.2192 6.09269 3
 -8 -1 1 25.6315 7.33122 2
 -8 1 1 36.8484 8.74128 3
 8 1 -1 32.1587 6.71563 1
 -8 1 1 32.7934 7.18052 2
 7 -1 -1 258.498 10.2571 3
 7 -1 -1 248.047 11.2249 1
 -7 -1 1 268.876 12.0559 3
 -7 -1 1 221.613 11.1916 2
 -7 1 1 258.353 11.8913 3
 7 1 -1 234.612 10.8491 1
 7 1 -1 226.491 9.96014 3
 -7 1 1 258.626 11.1406 2
 -6 -1 1 72.6169 6.02245 2
 6 -1 -1 81.574 6.01525 3
 -6 -1 1 82.2174 6.37093 3
 6 -1 -1 69.3261 6.64818 1
 6 1 -1 75.081 6.37004 1
 -6 1 1 79.9944 6.43698 3
 6 1 -1 73.1018 6.02781 3
 5 -1 -1 400.784 11.5485 1
 -5 -1 1 403.493 11.2825 2
 5 -1 -1 407.119 10.2738 3
 -5 -1 1 408.17 10.8426 3
 -5 1 1 398.526 10.7719 3
 5 1 -1 411.778 11.6861 1
 5 1 -1 410.792 10.1536 3
 -4 -1 1 156.154 6.00086 3
 -4 -1 1 156.517 6.13351 2
 4 -1 -1 163.432 5.73305 3
 4 -1 -1 167.596 6.35726 1
 4 1 -1 160.996 5.4706 3
 -4 1 1 153.977 6.11606 3
 4 1 -1 164.473 6.45939 1
 3 -1 -1 508.929 10.6035 3
 -3 -1 1 520.093 11.5781 2
 -3 -1 1 521.112 10.5959 3
 3 1 -1 512.153 10.4194 3
 -3 1 1 515.696 10.7872 3
 -3 1 1 519.87 33.2936 4
 3 1 -1 513.178 12.1672 1
 -2 -1 1 1336.61 22.7072 3
 -2 -1 1 1324.69 25.0115 2
 2 -1 -1 1306.32 22.8625 3
 -2 -1 1 1309.12 26.1358 1
 2 1 -1 1296.95 22.6322 3
 2 1 -1 1289.92 26.0693 1
 -2 1 1 1320.06 22.908 3
 1 -1 -1 10.5444 1.37088 3
 -1 -1 1 14.5681 1.70996 1
 -1 -1 1 11.3217 1.35591 2
 1 1 -1 16.0054 1.64176 1
 1 1 -1 14.5915 1.90612 2
 -1 1 1 14.886 1.52245 3
 -1 -1 -1 32.5907 2.60862 1
 -1 -1 -1 33.9086 1.8207 2
 -1 1 -1 33.5511 2.18176 3
 1 1 1 35.2864 2.60624 1
 -2 -1 -1 9669.2 176.029 2
 -2 -1 -1 9803 160.457 3
 -2 -1 -1 9593.86 182.539 1
 2 -1 1 9706.11 182.292 1
 2 -1 1 9676.29 160.229 3
 -2 1 -1 9555.24 160.999 3
 2 1 1 9510.49 181.887 1
 3 -1 1 963.915 17.9624 3
 -3 -1 -1 972.175 17.9357 3
 3 -1 1 961.813 20.001 1
 -3 -1 -1 972.779 20.4988 1
 3 1 1 939.323 20.3457 1
 -3 1 -1 958.835 18.0381 3
 3 1 1 969.704 17.8646 3
 4 -1 1 94.9639 4.86625 1
 -4 -1 -1 95.7165 5.24097 3
 -4 -1 -1 85.5085 4.91758 2
 4 -1 1 88.4162 4.65822 3
 -4 -1 -1 80.4772 5.53718 1
 -4 1 -1 87.0542 5.40374 3
 4 1 1 87.4358 4.57432 3
 4 1 1 86.5217 5.18323 1
 -5 -1 -1 658.803 14.7324 3
 5 -1 1 655.697 14.3171 3
 5 -1 1 645.673 15.905 1
 -5 -1 -1 645.339 15.4717 2
 5 1 1 626.296 14.128 3
 5 1 1 661.821 16.3431 1
 -5 1 -1 651.113 14.8119 3
 6 -1 1 4.81769 3.82783 1
 -6 -1 -1 7.4085 4.86063 3
 -6 -1 -1 3.70794 3.70001 2
 6 -1 1 -2.8812 2.62239 3
 6 1 1 3.47192 3.2918 3
 -6 1 -1 1.80827 4.53359 3
 6 1 1 -1.7069 3.56661 1
 -7 -1 -1 202.171 10.9903 2
 7 -1 1 202.986 10.9344 1
 -7 -1 -1 237.75 11.6601 3
 7 -1 1 214.912 9.71057 3
 7 1 1 208.7 10.8112 1
 7 1 1 200.925 9.30803 3
 -7 1 -1 206.968 11.4695 3
 8 -1 1 24.8115 5.8637 3
 8 -1 1 19.6617 7.20939 1
 -8 -1 -1 20.1764 7.16194 2
 -8 -1 -1 36.9124 8.55495 3
 -8 1 -1 11.0728 6.78488 2
 -8 1 -1 29.5476 8.36194 3
 8 1 1 31.1011 7.75483 1
 -9 -1 -1 51.5037 11.6609 3
 9 -1 1 37.7304 8.64822 3
 9 -1 1 36.2003 10.2084 1
 -9 -1 -1 21.027 9.88089 2
 -9 1 -1 25.771 10.8331 3
 9 1 1 30.6998 9.17087 1
 -9 1 -1 33.5522 8.99867 2
 -9 -2 1 -2.7067 10.7191 3
 9 -2 -1 -6.9869 8.66918 1
 9 -2 -1 4.34006 7.472 3
 -9 -2 1 -7.9912 9.73261 2
 -9 2 1 0.75238 10.4749 3
 -9 2 1 -22.419 7.9696 2
 9 2 -1 -8.0025 7.97758 1
 -8 -2 1 0.53254 6.90258 2
 -8 -2 1 8.5583 8.47642 3
 8 -2 -1 12.9864 5.59264 3
 8 -2 -1 5.79423 6.64874 1
 -8 2 1 9.64963 7.54949 3
 8 2 -1 -5.8816 5.70321 1
 7 -2 -1 12.3599 4.15618 3
 -7 -2 1 12.0107 5.55112 2
 -7 -2 1 9.90691 6.31379 3
 7 -2 -1 -3.8741 4.48618 1
 -7 2 1 12.7723 5.97262 3
 7 2 -1 11.9982 4.61679 1
 6 -2 -1 5.16764 3.61934 1
 -6 -2 1 0.15136 3.62444 2
 -6 -2 1 6.15401 4.99957 3
 6 -2 -1 -0.1482 3.03248 3
 -6 2 1 8.82077 4.6758 3
 6 2 -1 2.66431 3.39573 1
 5 -2 -1 44.6552 5.16102 1
 -5 -2 1 39.7444 4.03029 2
 -5 -2 1 40.6302 4.42998 3
 5 -2 -1 33.7208 3.50193 3
 -5 2 1 37.9254 4.58483 3
 5 2 -1 34.8052 3.98199 1
 -4 -2 1 559.385 13.1146 2
 -4 -2 1 553.129 12.0612 3
 4 -2 -1 556.331 12.168 3
 4 2 -1 554.463 13.8717 1
 -4 2 1 564.705 12.5592 3
 -3 -2 1 146.631 5.12701 3
 -3 -2 1 139.565 5.95147 1
 -3 -2 1 151.342 5.29581 2
 3 2 -1 144.572 5.85343 1
 -3 2 1 149.95 5.46075 3
 -2 -2 1 751.995 16.0412 1
 -2 -2 1 750.94 15.0864 2
 2 -2 -1 734.041 14.0607 3
 -2 2 1 761.881 14.146 3
 2 2 -1 751.084 15.0914 2
 2 2 -1 738.105 15.9545 1
 1 -2 -1 115.281 3.70389 3
 -1 -2 1 119.514 4.13608 1
 -1 -2 1 116.078 3.62143 2
 1 2 -1 120.94 4.03101 1
 1 2 -1 111.706 3.71561 2
 0 -2 1 713.667 30.328 4
 0 -2 1 680.438 13.5812 1
 0 -2 -1 685.926 30.1983 4
 0 -2 -1 702.536 13.9389 1
 0 2 1 732.541 30.5606 4
 0 2 -1 703.878 13.5898 1
 0 2 -1 622.066 30.2499 4
 0 2 1 705.806 13.947 1
 1 -2 1 6.43256 1.66329 3
 -1 -2 -1 6.11369 7.95525 4
 -1 -2 -1 1.85554 1.75059 1
 -1 -2 -1 5.08323 1.20802 2
 -1 2 -1 1.14604 1.64421 3
 1 2 1 5.8277 1.37994 2
 1 2 1 2.60416 1.72345 1
 -2 -2 -1 637.753 12.6659 2
 2 -2 1 616.429 12.1984 3
 -2 -2 -1 616.448 13.9438 1
 2 2 1 641.852 12.7376 2
 2 2 1 638.951 14.013 1
 -2 2 -1 618.519 12.248 3
 3 -2 1 183.163 5.85554 3
 -3 -2 -1 180.688 5.67165 2
 -3 -2 -1 190.091 6.63285 1
 -3 -2 -1 181.474 5.7777 3
 3 2 1 178.678 6.59209 1
 -3 2 -1 174.155 6.06404 3
 4 -2 1 2064.83 36.0193 3
 4 -2 1 2037.12 40.2476 1
 -4 -2 -1 1974.45 35.808 3
 -4 -2 -1 2006.61 41.0575 1
 -4 -2 -1 2048.05 38.9546 2
 -4 2 -1 2002.72 36.112 3
 4 2 1 2001.45 40.9985 1
 5 -2 1 56.4621 5.61707 1
 -5 -2 -1 50.7443 4.76113 1
 -5 -2 -1 65.2958 5.75597 2
 -5 -2 -1 67.5967 6.15897 3
 5 -2 1 69.7035 5.30474 3
 -5 2 -1 79.9329 6.58734 3
 5 2 1 54.6364 5.70612 1
 -6 -2 -1 -4.5019 3.84287 2
 -6 -2 -1 -0.0673 4.63367 3
 6 -2 1 0.5214 3.65782 1
 6 -2 1 -0.5363 3.18456 3
 -6 2 -1 -2.2637 4.50409 3
 6 2 1 -1.6425 3.66013 1
 -7 -2 -1 12.9585 5.68718 2
 -7 -2 -1 34.5179 6.49739 3
 7 -2 1 22.836 4.7824 3
 7 -2 1 23.9053 5.49249 1
 -7 2 -1 20.8435 6.63365 3
 7 2 1 25.9111 5.30067 1
 -8 -2 -1 36.5723 8.04027 2
 -8 -2 -1 39.2003 8.93757 3
 8 -2 1 12.1182 6.86087 1
 8 -2 1 16.9108 5.95442 3
 -8 2 -1 27.0829 8.45606 3
 8 2 1 29.6406 6.94223 1
 -9 -2 -1 6.13803 11.5808 3
 9 -2 1 -4.1785 8.99348 1
 9 -2 1 -0.0378 7.83626 3
 -9 -2 -1 22.8829 9.74039 2
 -9 2 -1 -5.4773 10.3712 3
 9 2 1 -15.461 8.96266 1
 -9 2 -1 -6.512 8.51934 2
 -9 -3 1 9.28614 9.52107 2
 9 -3 -1 8.1338 8.18354 3
 -9 -3 1 6.25507 11.9533 3
 9 -3 -1 8.26097 9.00126 1
 -9 3 1 2.61821 11.4065 3
 -9 3 1 -9.6918 7.43423 2
 9 3 -1 -1.5446 8.02266 1
 8 -3 -1 1.86812 6.44304 1
 8 -3 -1 6.46244 5.52735 3
 -8 -3 1 7.53894 8.42131 3
 -8 -3 1 9.34897 7.03992 2
 8 3 -1 12.175 6.08109 1
 -8 3 1 23.2452 8.64903 3
 7 -3 -1 71.8899 7.1437 1
 -7 -3 1 66.2898 7.79109 3
 7 -3 -1 65.3324 6.09179 3
 -7 -3 1 68.3469 6.96946 2
 7 3 -1 68.4795 6.46694 1
 -7 3 1 66.9014 7.80764 3
 -6 -3 1 25.8142 5.20194 3
 6 -3 -1 30.3354 4.82167 1
 6 -3 -1 26.1506 4.16187 3
 -6 -3 1 26.8669 4.73152 2
 6 3 -1 21.0897 4.35175 1
 -6 3 1 32.6392 5.6251 3
 5 -3 -1 461.34 11.6001 3
 -5 -3 1 437.963 12.1709 2
 -5 -3 1 452.125 11.6307 3
 -5 3 1 460.069 12.3189 3
 5 3 -1 459.7 13.096 1
 -4 -3 1 30.8233 3.52019 3
 4 -3 -1 28.9882 3.40363 3
 -4 -3 1 23.761 3.66477 1
 -4 -3 1 32.7048 3.43439 2
 -4 3 1 28.0565 3.82211 3
 4 3 -1 25.7633 3.43715 1
 -3 -3 1 837.692 15.8801 3
 -3 -3 1 809.207 17.1314 2
 3 -3 -1 831.107 16.197 3
 -3 -3 1 809.997 18.4949 1
 3 3 -1 819.646 18.3545 1
 -3 3 1 839.728 16.4022 3
 3 3 -1 833.422 17.2962 2
 2 -3 -1 1258.46 23.1236 3
 -2 -3 1 1294.45 24.8466 2
 -2 -3 1 1283.54 26.2261 1
 2 3 -1 1283.97 24.8535 2
 2 3 -1 1315.41 26.2473 1
 -1 -3 1 502.414 10.6207 2
 -1 -3 1 486.487 24.7642 4
 -1 -3 1 507.411 11.195 1
 1 3 -1 515.893 11.1773 1
 1 3 -1 516.395 10.7447 2
 0 -3 1 1020.95 45.0156 4
 0 -3 -1 1034.33 45.1316 4
 0 -3 1 1042.3 20.5247 1
 0 -3 -1 1041.64 20.8672 1
 0 3 1 1070.38 20.8989 1
 0 3 -1 1069.36 20.543 1
 -1 -3 -1 95.3821 4.29661 1
 1 -3 1 102.005 3.86869 3
 -1 -3 -1 88.9933 3.25471 2
 1 3 1 91.4344 4.14532 1
 1 3 1 101.274 3.49986 2
 -1 3 -1 122.934 14.1483 4
 1 3 1 94.0913 13.1468 4
 -2 -3 -1 1044.16 22.2652 1
 -2 -3 -1 1049.33 20.5637 2
 2 -3 1 1053.84 19.5603 3
 2 3 1 1038.35 20.5912 2
 -2 3 -1 1201.61 48.6982 4
 2 3 1 1044.41 22.2674 1
 -2 3 -1 1042.95 19.6081 3
 -3 -3 -1 263.202 8.24835 1
 -3 -3 -1 260.335 6.94642 2
 3 -3 1 260.787 7.22533 3
 3 3 1 256.201 8.14254 1
 -3 3 -1 257.412 7.52151 3
 -4 -3 -1 152.651 5.94796 2
 4 -3 1 160.095 6.32034 3
 -4 -3 -1 151.373 6.30757 3
 -4 -3 -1 148.026 7.25002 1
 4 -3 1 147.444 6.12386 1
 4 3 1 149.733 6.84687 1
 -4 3 -1 157.638 7.04167 3
 5 -3 1 811.142 18.8788 1
 -5 -3 -1 804.996 20.0109 1
 5 -3 1 832.073 17.5552 3
 -5 -3 -1 798.576 17.3879 3
 -5 -3 -1 826.174 18.4834 2
 5 3 1 824.371 19.8478 1
 -5 3 -1 804.195 17.9449 3
 -6 -3 -1 6.0155 4.79334 3
 6 -3 1 4.69607 3.86399 1
 -6 -3 -1 5.58863 4.37251 2
 6 -3 1 4.60359 3.63623 3
 6 3 1 12.8561 4.07721 1
 -6 3 -1 17.1503 5.53417 3
 -7 -3 -1 115.127 10.6556 3
 7 -3 1 106.13 9.85618 1
 7 -3 1 123.802 8.47459 3
 -7 -3 -1 141.278 10.5706 2
 -7 3 -1 115.726 10.9283 3
 7 3 1 118.621 9.34385 1
 8 -3 1 2.73545 6.64111 1
 8 -3 1 3.36357 5.31915 3
 -8 -3 -1 -0.203 8.45343 3
 -8 -3 -1 -4.0177 7.39565 2
 -8 3 -1 7.7751 8.19539 3
 8 3 1 -6.1898 6.07441 1
 9 -3 1 6.7738 9.54542 1
 -9 -3 -1 35.2767 12.4262 3
 9 -3 1 10.9279 8.14649 3
 -9 -3 -1 12.9073 9.91986 2
 9 3 1 0.2671 8.4922 1
 -9 3 -1 21.8777 11.4659 3
 9 -4 -1 1.3982 9.61599 1
 9 -4 -1 1.79807 7.87216 3
 -9 -4 1 5.13304 12.1199 3
 -9 -4 1 1.94272 10.1416 2
 -9 4 1 -3.8813 11.868 3
 9 4 -1 5.31405 7.71944 1
 8 -4 -1 1.47805 6.48129 1
 -8 -4 1 9.6408 7.21309 2
 8 -4 -1 1.87254 5.55131 3
 -8 -4 1 9.78829 9.02895 3
 -8 4 1 6.66512 8.57243 3
 8 4 -1 -0.9122 5.88962 1
 -7 -4 1 18.164 7.05897 3
 7 -4 -1 11.6062 4.55483 3
 7 -4 -1 19.7152 5.64389 1
 -7 -4 1 19.2255 6.07262 2
 7 4 -1 12.9424 5.14243 1
 -7 4 1 13.2178 7.07331 3
 6 -4 -1 236.985 10.0381 1
 6 -4 -1 230.896 9.61042 3
 -6 -4 1 232.565 10.2541 2
 -6 -4 1 243.123 10.1754 3
 -6 4 1 218.41 11.0386 3
 6 4 -1 249.195 10.5122 1
 -5 -4 1 9.45548 3.78172 3
 -5 -4 1 9.78386 3.59584 2
 5 -4 -1 4.32505 3.48782 3
 -5 -4 1 8.66141 4.09778 1
 5 4 -1 10.4132 3.53978 1
 -5 4 1 4.54359 4.16913 3
 -4 -4 1 1.70245 2.62664 2
 4 -4 -1 0.25981 2.88708 3
 -4 -4 1 2.46686 3.28831 1
 -4 -4 1 1.11957 2.93078 3
 4 4 -1 1.44748 2.66179 1
 4 4 -1 2.38728 3.10913 2
 -4 4 1 -0.1384 3.30943 3
 3 -4 -1 9.5091 2.75135 3
 -3 -4 1 6.00928 2.32185 2
 -3 -4 1 8.19715 2.99575 1
 3 4 -1 9.36678 2.85011 1
 3 4 -1 8.60413 2.61617 2
 -2 -4 1 196.563 5.78704 2
 -2 -4 1 181.135 6.67942 1
 2 -4 -1 195.27 5.94697 3
 -2 -4 1 191.343 16.8227 4
 2 4 -1 178.524 6.44472 1
 2 4 -1 190.004 6.1172 2
 -1 -4 1 352.942 8.53615 2
 -1 -4 1 353.508 8.95921 1
 1 4 -1 359.885 8.66983 2
 -1 4 1 390.443 23.6144 4
 1 4 -1 366.751 8.89544 1
 0 -4 -1 76.6575 3.73803 1
 0 -4 -1 69.9922 12.0463 4
 0 -4 1 90.4765 13.043 4
 0 -4 1 81.552 3.54427 1
 0 4 -1 92.7171 13.5708 4
 0 4 1 72.691 3.55333 1
 0 4 -1 75.2282 3.25788 1
 1 -4 1 585.266 11.6591 3
 -1 -4 -1 576.801 12.9747 1
 1 -4 1 571.395 11.8435 1
 1 4 1 569.571 11.9377 2
 1 4 1 580.839 12.9883 1
 -1 4 -1 578.275 31.3533 4
 1 4 1 542.859 29.7201 4
 -2 -4 -1 661.825 15.683 1
 -2 -4 -1 731.851 34.912 4
 2 -4 1 692.154 13.9383 3
 -2 -4 -1 696.231 14.1901 2
 2 4 1 696.374 14.2984 2
 2 4 1 665.456 15.7008 1
 -3 -4 -1 42.7088 4.24504 1
 -3 -4 -1 36.329 3.59807 2
 3 -4 1 43.1381 3.61396 3
 -3 4 -1 38.4163 3.9403 3
 3 4 1 39.3486 4.51933 1
 3 4 1 41.847 4.30044 2
 -4 -4 -1 60.7191 6.05974 1
 -4 -4 -1 53.6922 4.68585 2
 -4 -4 -1 50.2334 4.31791 3
 4 -4 1 42.5097 4.04338 3
 -4 4 -1 58.1986 4.91306 3
 4 4 1 67.2924 5.41271 1
 5 -4 1 10.2923 3.58402 3
 -5 -4 -1 10.072 3.97825 1
 -5 -4 -1 13.0168 4.07934 3
 5 -4 1 8.69918 3.40366 1
 -5 -4 -1 10.9694 3.59862 2
 -5 4 -1 13.6096 4.46008 3
 5 4 1 18.9774 4.05365 1
 6 -4 1 188.029 9.03378 1
 -6 -4 -1 179.875 9.09487 2
 -6 -4 -1 193.826 10.0259 3
 6 -4 1 176.062 8.39056 3
 -6 -4 -1 156.388 10.1865 1
 -6 4 -1 188.193 10.5516 3
 6 4 1 190.488 9.41483 1
 -7 -4 -1 63.1485 7.1382 2
 7 -4 1 57.7643 6.84798 1
 -7 -4 -1 60.5672 7.92923 3
 7 -4 1 54.2166 5.74551 3
 -7 4 -1 63.5513 8.29578 3
 7 4 1 54.4241 6.38013 1
 -8 -4 -1 -2.5255 9.1384 3
 -8 -4 -1 10.1838 7.50005 2
 8 -4 1 0.31869 7.26037 1
 8 -4 1 4.88709 5.90455 3
 8 4 1 12.9365 6.16472 1
 -8 4 -1 4.94947 8.73634 3
 9 -4 1 -12.075 9.79091 1
 -9 -4 -1 9.7212 10.0479 2
 9 -4 1 8.75324 7.56169 3
 -9 -4 -1 -9.4355 12.4992 3
 9 4 1 -5.4377 7.85401 1
 -9 4 -1 -1.5388 11.8282 3
 -8 -5 1 9.23973 9.29927 3
 8 -5 -1 9.8926 7.35359 1
 8 -5 -1 18.6268 6.18569 3
 -8 -5 1 9.9319 8.05202 2
 -8 5 1 21.7961 9.11923 3
 8 5 -1 21.4759 6.16269 1
 7 -5 -1 42.8152 5.78866 3
 -7 -5 1 32.6675 6.72855 2
 7 -5 -1 32.9515 6.53294 1
 -7 -5 1 37.9994 7.89674 3
 -7 5 1 33.6812 7.45515 3
 7 5 -1 37.7202 5.97017 1
 -6 -5 1 12.7241 4.77112 2
 6 -5 -1 20.3358 4.69091 1
 -6 -5 1 3.86515 5.21082 3
 6 -5 -1 18.6879 4.48624 3
 6 5 -1 0.58172 3.97073 1
 -6 5 1 16.0775 5.52025 3
 5 -5 -1 217.614 8.71079 3
 -5 -5 1 217.755 9.29488 3
 -5 -5 1 204.131 9.91321 1
 -5 -5 1 219.334 8.58174 2
 -5 5 1 216.82 9.88242 3
 5 5 -1 226.785 9.36246 1
 -4 -5 1 33.8762 4.92031 1
 -4 -5 1 39.1855 3.99042 2
 4 -5 -1 34.5115 4.4127 3
 4 5 -1 38.039 4.42389 2
 4 5 -1 34.5084 4.1404 1
 -3 -5 1 362.856 10.6552 1
 -3 -5 1 341.451 9.28417 2
 3 -5 -1 351.533 9.50503 3
 3 5 -1 346.637 9.5763 2
 3 5 -1 358.753 10.3409 1
 -2 -5 1 684.166 14.9567 2
 2 -5 -1 701.908 14.5992 3
 -2 -5 1 699.838 36.7337 4
 -2 -5 1 688.867 16.1016 1
 2 5 -1 686.966 15.1118 2
 2 5 -1 712.321 16.0455 1
 -1 -5 1 460.393 26.639 4
 -1 -5 1 429.587 10.9262 1
 1 -5 -1 430.617 10.3354 1
 -1 5 1 513.163 30.0577 4
 1 5 -1 431.103 10.6 2
 1 5 -1 431.818 10.7821 1
 0 -5 1 3291.56 129.408 4
 0 -5 -1 3218.05 129.097 4
 0 -5 -1 3104.04 60.4327 1
 0 -5 1 3094.78 60.0959 1
 0 5 -1 3062.8 60.0662 1
 0 5 -1 3074.49 58.6889 2
 1 -5 1 2.85148 1.71456 1
 -1 -5 -1 1.10288 2.36067 1
 -1 5 -1 12.0435 16.6017 4
 1 5 1 12.5655 14.711 4
 1 5 1 0.10045 2.01569 2
 1 5 1 1.81627 1.96304 1
 -2 -5 -1 493.947 12.6355 1
 -2 -5 -1 469.141 11.0049 2
 2 -5 1 501.236 11.2835 3
 2 5 1 498.327 11.3485 2
 2 5 1 518.933 12.6491 1
 -3 -5 -1 69.6979 4.28544 2
 -3 -5 -1 67.1469 5.90923 1
 3 -5 1 67.4011 5.002 3
 3 5 1 72.1992 5.12278 1
 3 5 1 70.9741 4.8218 2
 -4 -5 -1 173.374 6.86529 2
 4 -5 1 172.451 7.23318 3
 -4 -5 -1 179.939 8.48207 1
 -4 5 -1 182.739 8.3443 3
 4 5 1 190.231 7.59718 2
 4 5 1 193.002 8.00302 1
 -5 -5 -1 116.578 8.05198 3
 -5 -5 -1 114.099 6.82044 2
 -5 -5 -1 121.868 8.85898 1
 5 -5 1 101.024 7.13876 3
 5 -5 1 122.948 6.75249 1
 5 5 1 121.783 7.51443 1
 -5 5 -1 107.338 8.62659 3
 -6 -5 -1 10.9429 5.39229 1
 -6 -5 -1 -0.0689 5.2297 3
 6 -5 1 1.20163 4.4798 1
 -6 -5 -1 4.26727 4.47888 2
 6 -5 1 7.10578 4.50765 3
 6 5 1 14.878 4.4231 1
 -6 5 -1 8.19207 6.02328 3
 -7 -5 -1 188.616 11.2754 2
 7 -5 1 195.654 11.304 1
 7 -5 1 175.311 9.89273 3
 -7 -5 -1 204.101 13.4347 3
 7 5 1 225.632 11.1337 1
 -7 5 -1 175.345 13.5859 3
 8 -5 1 29.7067 7.83786 1
 -8 -5 -1 10.978 7.66147 2
 -8 -5 -1 33.2716 10.4922 3
 8 -5 1 30.6578 7.27981 3
 8 5 1 29.5756 6.76134 1
 -8 5 -1 13.4182 9.90697 3
 -8 -6 1 14.7014 8.32999 2
 8 -6 -1 -3.89 7.56226 1
 -8 -6 1 16.4818 10.4265 3
 8 -6 -1 -0.5119 6.65683 3
 8 6 -1 20.0979 6.71566 1
 7 -6 -1 32.6665 6.70105 3
 7 -6 -1 36.1345 6.66596 1
 -7 -6 1 37.8099 8.20117 3
 -7 -6 1 34.6722 7.01491 2
 7 6 -1 53.8983 6.87515 1
 -6 -6 1 20.1225 5.36787 2
 -6 -6 1 17.5351 6.47808 3
 -6 -6 1 13.0464 5.8611 1
 6 -6 -1 8.34197 5.1395 3
 6 6 -1 27.4699 5.05422 1
 5 -6 -1 58.4274 5.51962 3
 -5 -6 1 49.9455 5.77468 3
 -5 -6 1 57.4948 5.5038 2
 -5 -6 1 51.0839 6.32916 1
 5 6 -1 52.1339 6.22528 2
 5 6 -1 56.8199 6.06981 1
 -4 -6 1 61.5664 5.82905 1
 -4 -6 1 68.2446 5.82384 2
 4 -6 -1 58.593 5.97905 3
 4 6 -1 68.5226 6.38097 1
 4 6 -1 74.8869 7.00354 2
 3 -6 -1 -1.0986 2.69308 3
 -3 -6 1 11.062 2.90623 2
 -3 -6 1 7.61301 3.53316 1
 3 6 -1 4.35698 3.35575 2
 3 6 -1 7.88864 2.91686 1
 -2 -6 1 187.861 7.70256 1
 2 -6 -1 187.58 6.99279 3
 -2 -6 1 185.064 6.68221 2
 2 6 -1 190.09 7.09262 2
 2 6 -1 194.059 7.21244 1
 1 -6 -1 521.225 12.0439 1
 -1 -6 1 513.152 12.6586 1
 1 6 -1 502.977 12.3007 2
 1 6 -1 493.348 12.3245 1
 0 -6 1 52.5068 4.51311 1
 0 -6 -1 65.5985 15.5071 4
 0 -6 1 77.181 16.3838 4
 0 -6 -1 58.3159 4.74158 1
 0 6 -1 53.6935 4.89869 2
 0 6 1 57.835 4.91398 2
 1 -6 1 1446.35 29.5444 1
 -1 -6 -1 1617.44 68.2742 4
 -1 -6 -1 1447.41 30.6379 1
 1 6 1 1494.64 30.7083 1
 1 6 1 1432.29 29.1338 2
 2 -6 1 31.9266 3.51698 3
 -2 -6 -1 35.878 4.07718 1
 2 -6 1 29.4808 3.19653 1
 2 6 1 35.583 3.70064 1
 2 6 1 38.6276 3.64883 2
 -3 -6 -1 55.2136 5.09321 1
 3 -6 1 60.0031 4.84106 3
 -3 -6 -1 56.6669 4.65053 2
 3 6 1 49.4312 5.21005 1
 3 6 1 49.5373 5.26224 2
 4 -6 1 141.587 7.16246 3
 -4 -6 -1 129.089 8.48594 1
 -4 -6 -1 133.287 6.64238 2
 4 6 1 147.826 7.80749 2
 4 6 1 157.882 7.78896 1
 5 -6 1 -1.4965 3.85618 3
 -5 -6 -1 9.76815 4.98963 3
 -5 -6 -1 2.19721 3.70581 2
 -5 -6 -1 8.19596 4.88074 1
 5 6 1 5.91261 3.67689 1
 6 -6 1 101.395 8.4185 1
 6 -6 1 130.3 8.57264 3
 -6 -6 -1 109.299 10.9688 3
 -6 -6 -1 112.513 10.5944 1
 -6 -6 -1 110.578 8.50306 2
 6 6 1 118.802 8.49503 1
 -6 6 -1 125.239 9.17645 3
 -7 -6 -1 46.2648 7.37 2
 7 -6 1 50.032 7.00232 3
 7 -6 1 38.9362 6.71683 1
 -7 -6 -1 47.4572 8.58594 3
 -7 6 -1 62.8727 9.32864 3
 7 6 1 59.0267 6.82305 1
 -8 -6 -1 37.0752 11.3763 3
 -8 -6 -1 28.9244 8.82518 2
 8 -6 1 42.5036 8.80001 1
 8 -6 1 28.7921 6.44368 3
 8 6 1 16.6382 6.68369 1
 -8 6 -1 38.0227 10.6675 3
 -8 -7 1 6.5902 11.7594 3
 8 -7 -1 0.43248 8.55647 1
 8 -7 -1 14.6272 7.34147 3
 -8 -7 1 11.8437 9.40504 2
 8 7 -1 0.37218 7.33586 1
 7 -7 -1 82.3716 8.31207 1
 -7 -7 1 89.7269 8.7834 2
 -7 -7 1 86.6003 9.98265 3
 7 -7 -1 104.441 10.2467 3
 7 7 -1 89.0276 10.4235 1
 6 -7 -1 18.35 5.34782 3
 -6 -7 1 13.7289 5.66139 2
 -6 -7 1 13.1815 6.79937 3
 -6 -7 1 8.58101 5.87202 1
 6 7 -1 14.9133 5.29681 1
 -5 -7 1 108.385 10.5277 1
 -5 -7 1 138.214 10.0183 3
 -5 -7 1 121.799 8.38893 2
 5 -7 -1 127.078 8.37311 3
 5 7 -1 129.27 9.14914 1
 5 7 -1 147.475 10.5981 2
 4 -7 -1 48.0132 5.24592 3
 -4 -7 1 40.3306 4.70487 2
 -4 -7 1 46.7817 6.08608 1
 4 7 -1 42.554 5.36064 1
 4 7 -1 45.0014 5.4117 2
 3 -7 -1 164.977 7.79311 3
 -3 -7 1 179.89 7.50454 2
 -3 -7 1 175.787 8.99611 1
 3 7 -1 165.934 8.29351 2
 3 7 -1 175.155 8.18394 1
 2 -7 -1 298.619 8.58875 1
 -2 -7 1 276.371 10.1947 1
 2 -7 -1 304.841 9.4442 3
 2 7 -1 291.756 9.54616 1
 2 7 -1 288.431 9.59679 2
 1 -7 -1 8.72151 2.78701 1
 -1 -7 1 9.65401 3.53936 1
 1 7 -1 7.36941 2.52743 1
 1 7 -1 5.91464 3.24938 2
 0 -7 -1 409.672 29.0241 4
 0 -7 -1 347.236 10.1535 1
 0 -7 1 349.168 9.87741 1
 0 7 -1 356.818 10.4186 2
 0 7 1 338.383 10.08 2
 -1 -7 -1 144.026 7.3015 1
 1 -7 1 148.882 6.02039 1
 -1 -7 -1 165.847 21.7927 4
 1 7 1 143.215 6.54997 1
 1 7 1 147.559 6.75519 2
 -2 -7 -1 270.666 9.77355 1
 2 -7 1 275.599 7.72493 1
 2 -7 1 264.129 8.82684 3
 2 7 1 259.636 8.79102 2
 2 7 1 273.939 9.28025 1
 3 -7 1 61.4137 5.26057 3
 -3 -7 -1 54.0128 5.48403 2
 -3 -7 -1 53.9255 5.75468 1
 3 7 1 49.3158 4.74757 2
 3 7 1 48.3329 4.80585 1
 -4 -7 -1 17.8486 5.04844 1
 -4 -7 -1 20.5017 3.94223 2
 4 -7 1 14.3438 4.39365 3
 4 7 1 10.0142 3.88483 1
 4 7 1 19.6308 4.68876 2
 5 -7 1 14.1583 4.79833 3
 -5 -7 -1 27.7109 6.14974 3
 -5 -7 -1 23.3753 6.08083 1
 -5 -7 -1 12.9815 4.56795 2
 5 7 1 24.3928 4.32115 1
 -6 -7 -1 33.902 7.38026 1
 -6 -7 -1 33.5297 6.00198 2
 6 -7 1 28.5253 5.97725 3
 -6 -7 -1 34.1601 7.67584 3
 6 -7 1 31.0559 5.55271 1
 6 7 1 33.7781 5.54423 1
 -7 -7 -1 69.8358 8.33168 2
 -7 -7 -1 68.7456 9.90831 3
 7 -7 1 68.172 7.84707 1
 7 -7 1 57.1064 8.09762 3
 -7 -7 -1 61.2446 8.85581 1
 7 7 1 95.9839 10.3391 1
 8 -7 1 -17.092 7.10954 3
 8 -7 1 -5.396 8.93747 1
 -8 -7 -1 19.445 12.4185 3
 -8 -7 -1 11.0396 8.94968 2
 8 7 1 5.99517 7.06773 1
 -7 -8 1 17.7872 8.41589 2
 7 -8 -1 20.0686 7.65059 3
 7 -8 -1 19.7655 7.45382 1
 -7 -8 1 9.23623 9.70509 3
 7 8 -1 12.8514 7.30311 1
 -6 -8 1 36.0308 6.81105 2
 -6 -8 1 32.2318 8.04721 1
 -6 -8 1 42.5106 8.43853 3
 6 -8 -1 38.4599 7.03658 3
 6 8 -1 26.0946 6.36233 1
 -5 -8 1 28.7157 5.70119 2
 5 -8 -1 32.3963 5.93625 3
 -5 -8 1 34.7513 7.61036 1
 5 8 -1 23.1999 5.29183 1
 5 8 -1 36.1114 7.26746 2
 -4 -8 1 188.242 11.6339 1
 4 -8 -1 193.833 9.78247 3
 -4 -8 1 212.093 9.53631 2
 4 8 -1 192.653 10.8031 2
 4 8 -1 186.013 9.99767 1
 -3 -8 1 105.291 9.00782 1
 3 -8 -1 102.537 6.00401 1
 3 -8 -1 97.3739 7.55806 3
 3 8 -1 117.249 8.5637 2
 3 8 -1 93.239 7.60558 1
 2 -8 -1 36.914 4.80433 3
 2 -8 -1 40.0721 4.12952 1
 -2 -8 1 41.3138 5.44093 1
 2 8 -1 38.4898 5.05758 2
 2 8 -1 33.0683 4.45582 1
 -1 -8 1 214.949 8.97976 1
 1 -8 -1 202.6 8.10036 1
 1 8 -1 191.224 7.61404 1
 1 8 -1 184.986 8.70811 2
 0 -8 -1 -1.1167 3.40391 1
 0 -8 1 2.51875 3.59714 1
 0 8 -1 3.54525 3.83072 2
 0 8 1 0.01812 3.50147 2
 -1 -8 -1 150.431 8.38501 1
 1 -8 1 152.041 6.98615 1
 1 8 1 161.019 7.27692 1
 1 8 1 149.674 7.79306 2
 -2 -8 -1 3.66187 4.53687 1
 2 -8 1 5.50424 3.05308 1
 2 -8 1 5.29314 3.90646 3
 2 8 1 5.42909 3.28228 1
 2 8 1 5.64759 4.04151 2
 3 -8 1 56.239 5.11531 1
 3 -8 1 78.2945 6.28981 3
 -3 -8 -1 59.6093 6.78999 1
 3 8 1 55.7849 5.55748 1
 3 8 1 67.606 5.91147 2
 -4 -8 -1 127.056 7.96414 2
 -4 -8 -1 103.907 10.3896 1
 4 -8 1 106.477 8.47685 3
 4 8 1 119.787 9.23212 2
 4 8 1 109.676 8.7713 1
 -5 -8 -1 0.97978 6.69033 1
 -5 -8 -1 3.58195 4.9473 2
 5 -8 1 -2.0648 5.25453 3
 5 8 1 -5.7358 4.47044 1
 5 8 1 2.30725 6.22352 2
 -6 -8 -1 64.0214 8.93738 1
 -6 -8 -1 85.8441 9.56699 3
 -6 -8 -1 91.274 7.99503 2
 6 -8 1 76.0443 8.05639 3
 6 -8 1 79.6906 9.03772 1
 6 8 1 68.1518 7.40326 1
 -7 -8 -1 25.5865 8.57544 2
 7 -8 1 28.0576 7.3743 3
 -7 -8 -1 11.0384 10.2868 3
 -7 -8 -1 9.25766 8.65278 1
 7 -8 1 13.5315 7.0097 1
 7 8 1 15.1144 7.2728 1
 -6 -9 1 8.62882 6.93534 2
 -6 -9 1 11.0693 9.67433 3
 -6 -9 1 16.3766 8.87597 1
 6 -9 -1 23.1294 7.0377 3
 6 9 -1 17.4714 7.38766 1
 5 -9 -1 66.8356 7.51512 3
 -5 -9 1 79.6737 7.65675 2
 -5 -9 1 64.4193 9.6047 1
 5 9 -1 77.9714 7.92286 1
 5 9 -1 75.3339 9.1792 2
 4 -9 -1 52.3428 5.02959 1
 -4 -9 1 47.8334 7.72223 1
 4 -9 -1 57.2432 7.01715 3
 4 9 -1 54.2281 7.46486 2
 4 9 -1 44.2326 6.77793 1
 -3 -9 1 48.6775 7.11744 1
 3 -9 -1 36.2678 5.73245 3
 3 -9 -1 48.1722 4.94202 1
 3 9 -1 46.7909 6.5941 2
 3 9 -1 43.4509 5.61188 1
 2 -9 -1 75.3468 6.49962 3
 -2 -9 1 84.0252 7.36733 1
 2 -9 -1 89.1163 7.15297 1
 2 9 -1 69.2499 6.93518 1
 2 9 -1 79.8179 6.9282 2
 -1 -9 1 6.6098 4.96398 1
 1 -9 -1 -4.0612 3.98121 1
 1 9 -1 3.50047 3.07059 1
 1 9 -1 -1.0716 4.5738 2
 0 -9 1 73.9236 7.73816 1
 0 -9 -1 79.1867 7.66685 1
 0 9 1 86.5442 8.22777 2
 0 9 -1 76.0444 8.42218 2
 1 -9 1 27.3149 4.95569 3
 1 -9 1 25.273 4.58594 1
 -1 -9 -1 24.7915 5.74078 1
 1 9 1 22.6109 4.85049 2
 -1 9 -1 23.5065 5.55876 2
 2 -9 1 20.4138 4.13792 1
 2 -9 1 14.9174 5.24071 3
 -2 -9 -1 26.9943 6.07128 1
 2 9 1 14.3245 4.15301 1
 2 9 1 20.7853 5.13074 2
 3 -9 1 12.8883 3.86384 1
 3 -9 1 16.2149 5.32292 3
 -3 -9 -1 8.67424 6.19467 1
 3 9 1 10.1388 4.57413 1
 3 9 1 11.8195 5.69877 2
 -4 -9 -1 74.6052 8.59597 1
 4 -9 1 79.6987 6.82653 1
 4 -9 1 84.2711 7.81164 3
 4 9 1 82.9237 7.55596 2
 4 9 1 68.4262 7.19584 1
 -5 -9 -1 50.0791 9.20745 1
 5 -9 1 55.4861 7.43585 3
 -5 -9 -1 68.6017 7.15921 2
 5 9 1 67.9627 8.45569 2
 5 9 1 47.2601 7.0745 1
 6 -9 1 -5.5305 7.01332 3
 -6 -9 -1 -7.3137 6.63298 2
 -6 -9 -1 11.7185 10.0338 3
 -6 -9 -1 -6.2025 9.10631 1
 6 -9 1 2.92606 5.76572 1
 6 9 1 -8.9093 6.79297 1
 -6 -10 1 32.1356 9.19606 2
 -6 -10 1 22.7304 11.7102 1
 -6 -10 1 28.1927 11.6788 3
 6 -10 -1 20.3552 8.88791 3
 6 10 -1 8.18084 9.25281 1
 5 -10 -1 0.83151 7.09023 3
 -5 -10 1 -6.8389 9.33121 1
 5 -10 -1 -0.5395 5.41808 1
 5 10 -1 11.9582 9.3229 2
 5 10 -1 -2.5983 7.3065 1
 -4 -10 1 114.963 10.8435 1
 4 -10 -1 88.9144 9.29241 3
 4 -10 -1 114.438 8.89415 1
 4 10 -1 114.078 9.59794 1
 4 10 -1 97.1917 9.52731 2
 3 -10 -1 20.1475 5.25211 1
 3 -10 -1 1.41145 5.94935 3
 -3 -10 1 11.6712 6.98601 1
 3 10 -1 13.3987 6.93228 2
 3 10 -1 13.339 5.08227 1
 2 -10 -1 102.818 9.81366 3
 2 -10 -1 90.6616 8.73483 1
 -2 -10 1 113.997 9.08898 1
 2 10 -1 98.6691 10.6535 2
 2 10 -1 92.5695 8.39224 1
 1 -10 -1 59.3365 6.51802 1
 -1 -10 1 68.8515 7.50158 1
 1 10 -1 65.296 6.94291 2
 -1 10 1 61.9724 6.8569 2
 0 -10 -1 -3.1683 5.30955 1
 0 -10 1 3.46627 5.46264 1
 0 10 -1 -1.9048 5.50714 2
 0 10 1 2.81575 5.28909 2
 -1 -10 -1 64.2355 7.60426 1
 1 -10 1 54.1422 6.6672 3
 1 -10 1 67.3625 6.34322 1
 1 10 1 59.4323 6.48763 2
 -1 10 -1 60.4507 7.35391 2
 2 -10 1 44.0312 6.84356 3
 -2 -10 -1 53.921 7.9208 1
 2 -10 1 38.3292 5.36664 1
 2 10 1 40.4342 6.55024 2
 2 10 1 46.5166 5.61298 1
 3 -10 1 48.7243 5.35947 1
 3 -10 1 48.5073 7.50997 3
 -3 -10 -1 48.7034 8.53411 1
 3 10 1 48.6599 7.38576 2
 3 10 1 46.1995 6.32122 1
 4 -10 1 59.5586 8.63808 3
 -4 -10 -1 61.4388 9.13534 1
 4 -10 1 75.346 8.10962 1
 4 10 1 63.8665 8.12845 1
 4 10 1 67.6323 8.12947 2
 5 -10 1 0.50535 4.7984 1
 -5 -10 -1 -3.8238 9.33801 1
 5 -10 1 1.71659 7.59566 3
 5 10 1 10.6961 8.72549 2
 5 10 1 -4.7422 7.20979 1
 6 -10 1 36.2376 7.07156 1
 -6 -10 -1 36.3809 11.3242 1
 -6 -10 -1 31.3102 12.3146 3
 6 -10 1 31.7544 6.28082 1
 6 -10 1 18.9398 8.96301 3
 6 10 1 1.14692 8.95127 1
 5 -11 -1 29.2111 9.87936 3
 -5 -11 1 18.1321 11.674 1
 5 -11 -1 22.5772 7.27233 1
 5 11 -1 27.8822 11.4948 2
 5 11 -1 3.47178 8.36319 1
 -4 -11 1 26.7554 10.7046 1
 4 -11 -1 20.6711 9.17619 3
 4 -11 -1 36.1693 6.816 1
 4 11 -1 12.4889 9.40024 2
 4 11 -1 26.5189 7.7043 1
 3 -11 -1 -7.1934 6.96274 3
 -3 -11 1 10.5297 8.14476 1
 3 -11 -1 6.25265 5.93939 1
 3 11 -1 0.31494 5.546 1
 3 11 -1 7.36597 8.23609 2
 -2 -11 1 91.0751 9.46116 1
 2 -11 -1 83.9292 8.44227 3
 2 -11 -1 66.6713 7.23385 1
 2 11 -1 77.5175 8.61677 2
 2 11 -1 59.5557 6.6743 1
 1 -11 -1 9.18699 6.39111 1
 -1 -11 1 10.4683 7.2845 1
 1 11 -1 14.5898 6.9203 2
 -1 11 1 14.3709 6.93668 2
 0 -11 -1 2.35438 6.81173 1
 0 -11 1 12.3771 6.94228 1
 0 11 -1 -1.2256 7.02226 2
 0 11 1 0.66581 6.67858 2
 1 -11 1 0.81819 6.19643 1
 1 -11 1 2.92586 6.49911 3
 -1 -11 -1 1.78004 7.667 1
 -1 11 -1 6.15363 6.97764 2
 1 11 1 -3.135 6.2108 2
 2 -11 1 36.5942 7.59488 3
 2 -11 1 34.3918 6.46017 1
 -2 -11 -1 27.9637 8.56638 1
 2 11 1 35.8072 7.7145 2
 3 -11 1 3.44588 7.41888 3
 3 -11 1 -11.569 5.53465 1
 -3 -11 -1 -2.2885 8.44998 1
 3 11 1 -6.8516 7.65763 2
 3 11 1 -0.5181 6.05832 1
 -4 -11 -1 25.6417 10.1092 1
 4 -11 1 6.37217 5.80758 1
 4 -11 1 25.5669 9.37102 3
 4 11 1 13.4185 8.5391 2
 4 11 1 7.65822 7.40379 1
 -5 -11 -1 13.6306 12.2033 1
 5 -11 1 13.7682 6.15785 1
 5 -11 1 4.96619 9.77261 3
 5 11 1 15.6161 10.4424 2
 5 11 1 6.15549 8.72006 1
 3 -12 -1 5.51122 7.78446 1
 -3 -12 1 15.4575 10.8237 1
 3 -12 -1 -3.1884 9.05029 3
 3 12 -1 12.8147 7.39773 1
 3 12 -1 18.1596 10.2275 2
 2 -12 -1 43.9339 9.12511 3
 -2 -12 1 47.4518 10.2076 1
 2 -12 -1 50.2315 8.46201 1
 2 12 -1 26.2884 9.55699 2
 -2 12 1 38.0988 9.58619 2
 -1 -12 1 79.0303 10.5106 1
 1 -12 -1 63.1675 9.10924 3
 1 -12 -1 64.3033 8.82478 1
 -1 12 1 54.8261 9.45934 2
 1 12 -1 59.9327 9.68223 2
 0 -12 1 2.34664 8.0949 1
 0 -12 -1 3.75273 8.42086 1
 0 12 -1 11.0254 8.73898 2
 0 12 1 2.33541 8.20455 2
 1 -12 1 55.6776 8.79551 1
 1 -12 1 44.8234 8.98694 3
 -1 -12 -1 60.5495 10.4369 1
 -1 12 -1 38.6845 10.0743 2
 1 12 1 45.8405 8.96014 2
 -2 -12 -1 9.41511 10.1171 1
 2 -12 1 9.09058 7.45764 1
 2 -12 1 -0.133 8.41859 3
 2 12 1 17.6793 8.7946 2
 -2 12 -1 0.43051 9.3189 2
 3 -12 1 8.97302 7.19511 1
 -3 -12 -1 5.83669 10.8162 1
 3 -12 1 16.5017 10.3131 3
 3 12 1 3.29284 7.25765 1
 3 12 1 -4.1255 9.45822 2
 0 -13 1 6.98341 10.5281 1
 0 -13 1 -2.0181 9.20233 3
 0 -13 -1 24.6764 11.1401 1
 0 13 1 9.36693 10.5595 2
 0 13 -1 -3.2373 10.9089 2
 9 0 -2 -0.7315 7.77735 1
 9 0 -2 5.87692 7.82646 3
 -9 0 2 -5.3146 10.107 3
 -9 0 2 -12.303 8.36466 2
 8 0 -2 76.4614 7.34386 3
 -8 0 2 51.5769 7.73657 2
 8 0 -2 64.9853 7.8124 1
 -8 0 2 66.1176 9.01442 3
 7 0 -2 33.8012 5.69034 1
 -7 0 2 34.2478 6.56779 3
 -7 0 2 37.1937 5.68662 2
 7 0 -2 34.2012 5.49501 3
 -6 0 2 27.3593 4.15233 2
 6 0 -2 35.1097 4.48411 1
 -6 0 2 33.6529 5.01447 3
 6 0 -2 35.6439 4.34106 3
 5 0 -2 260.024 7.76366 3
 -5 0 2 256.238 8.73135 2
 5 0 -2 258.046 8.88003 1
 -5 0 2 254.585 8.49326 3
 4 0 -2 19.9581 2.50574 3
 4 0 -2 21.1806 3.00841 1
 -4 0 2 20.457 3.34614 3
 -4 0 2 20.3074 3.10198 2
 3 0 -2 408.432 8.63585 3
 3 0 -2 401.549 9.99506 1
 -3 0 2 397.816 8.77804 3
 2 0 -2 38.9063 2.5525 3
 -2 0 2 42.2647 2.96966 3
 -2 0 2 41.652 3.1609 2
 1 0 -2 1380.18 22.5996 3
 -1 0 2 1367.9 22.6063 3
 1 0 -2 1346.46 25.0905 2
 -1 0 2 1314.34 25.0818 2
 -1 0 -2 9.83113 1.26057 1
 -1 0 -2 10.3078 1.28144 3
 1 0 2 9.21838 1.15432 3
 1 0 2 9.7714 1.31114 1
 -2 0 -2 3336.04 63.3838 1
 2 0 2 3321.85 63.3715 1
 2 0 2 3322.43 55.9046 3
 -2 0 -2 3372.21 55.906 3
 3 0 2 390.822 9.62761 1
 -3 0 -2 391.252 9.71128 1
 3 0 2 377.989 8.66154 3
 -4 0 -2 365.417 9.43229 3
 4 0 2 368.594 9.0444 3
 4 0 2 374.054 10.1395 1
 -5 0 -2 497.766 12.5598 3
 5 0 2 502.364 11.9736 3
 5 0 2 511.73 13.4381 1
 6 0 2 30.8605 4.86368 1
 -6 0 -2 42.9617 5.70109 3
 6 0 2 33.8308 4.11353 3
 7 0 2 473.68 13.4607 3
 -7 0 -2 422.971 14.571 2
 7 0 2 442.261 15.259 1
 -7 0 -2 444.497 14.6425 3
 8 0 2 130.469 10.1771 3
 -8 0 -2 108.261 11.4661 2
 8 0 2 130.79 12.2757 1
 -8 0 -2 114.884 9.57166 3
 -9 0 -2 76.8891 10.9399 2
 9 0 2 89.8222 11.1759 1
 -9 0 -2 91.9214 12.3797 3
 9 -1 -2 -7.0321 7.58035 3
 -9 -1 2 5.0922 9.72814 3
 -9 -1 2 4.88211 8.92277 2
 9 -1 -2 -6.0741 7.95819 1
 -9 1 2 -2.3526 10.1571 3
 -9 1 2 -23.718 7.77994 2
 9 1 -2 -20.602 7.52447 1
 8 -1 -2 4.25221 5.61123 3
 -8 -1 2 8.01676 7.83651 3
 -8 -1 2 0.73334 6.36467 2
 8 -1 -2 -0.9638 6.09259 1
 8 1 -2 -5.7685 5.57261 1
 -8 1 2 -0.852 5.38825 2
 -8 1 2 2.07361 7.35151 3
 7 -1 -2 16.6309 5.15177 1
 -7 -1 2 28.8095 5.80452 2
 -7 -1 2 27.4346 6.5943 3
 7 -1 -2 30.1909 5.00524 3
 -7 1 2 24.0244 6.24654 3
 7 1 -2 27.9786 4.96737 3
 7 1 -2 15.4928 4.34964 1
 -7 1 2 20.86 5.28338 2
 6 -1 -2 100.023 7.01304 1
 -6 -1 2 84.1486 7.18678 2
 6 -1 -2 106.518 6.31025 3
 -6 -1 2 109.245 7.95898 3
 -6 1 2 94.0832 7.93704 3
 6 1 -2 90.7845 6.29898 3
 6 1 -2 105.664 7.17875 1
 5 -1 -2 6.76676 2.65169 3
 -5 -1 2 4.91228 2.94068 2
 -5 -1 2 5.3836 3.7198 3
 5 -1 -2 8.06224 3.01002 1
 5 1 -2 3.95447 2.48192 3
 -5 1 2 8.51441 3.54614 3
 5 1 -2 3.39751 2.9942 1
 -4 -1 2 -0.4433 2.22263 2
 4 -1 -2 3.40018 2.22285 3
 -4 -1 2 -1.9505 2.78651 3
 -4 1 2 -1.8118 2.68874 3
 4 1 -2 -5.4224 2.02952 1
 4 1 -2 -3.8279 1.79147 3
 -3 -1 2 -0.2789 2.06707 3
 3 -1 -2 0.28021 1.83668 3
 -3 -1 2 0.03071 1.91683 2
 -3 1 2 1.10471 2.15964 3
 3 1 -2 -1.0508 1.86996 1
 3 1 -2 -2.1884 1.49259 3
 2 -1 -2 1166.55 20.5038 3
 -2 -1 2 1167.5 22.5468 2
 -2 -1 2 1185.18 20.2525 3
 2 1 -2 1152.43 22.5124 2
 2 1 -2 1161.07 20.2067 3
 -2 1 2 1187.54 20.5849 3
 2 1 -2 1157.24 23.4919 1
 -1 -1 2 2160 39.9322 2
 -1 -1 2 2188.73 35.9624 3
 1 -1 -2 2184.62 36.339 3
 1 1 -2 2199.86 41.3604 1
 1 1 -2 2144.37 39.9185 2
 0 -1 -2 19.2174 4.63437 4
 0 1 -2 14.1656 1.23069 2
 0 1 2 18.1327 4.5681 4
 -1 -1 -2 189.504 5.10523 1
 1 -1 2 189.71 4.49209 3
 1 -1 2 200.005 4.36401 1
 -1 1 -2 198.614 4.48454 3
 -2 -1 -2 9999.99 163.428 3
 2 -1 2 9842.32 162.065 3
 -2 -1 -2 9492.16 185.898 1
 2 -1 2 9830.17 184.599 1
 -2 1 -2 9757.4 162.487 3
 2 1 2 9706.9 184.322 1
 -3 -1 -2 66.933 4.54337 1
 3 -1 2 63.1577 3.91928 1
 -3 -1 -2 70.788 4.01283 3
 3 -1 2 66.55 3.85195 3
 -3 1 -2 70.585 4.54485 3
 3 1 2 61.6717 4.35645 1
 3 1 2 72.609 3.82374 3
 -4 -1 -2 50.2942 5.10476 1
 4 -1 2 48.0772 4.38414 1
 4 -1 2 56.1472 4.29161 3
 -4 -1 -2 49.9148 4.91739 3
 4 1 2 52.9499 4.63295 1
 4 1 2 48.581 4.11652 3
 -4 1 -2 50.0791 4.19984 3
 5 -1 2 6.27933 2.90047 3
 -5 -1 -2 1.54539 3.69859 3
 5 -1 2 2.76704 2.93675 1
 -5 -1 -2 -0.9167 2.78835 2
 5 1 2 1.52607 2.86813 1
 -5 1 -2 6.99957 3.80758 3
 5 1 2 3.36677 2.75622 3
 6 -1 2 3.15705 3.36966 3
 -6 -1 -2 2.48202 4.69683 3
 -6 -1 -2 -3.0509 3.62089 2
 6 -1 2 -4.691 3.5035 1
 6 1 2 -5.8923 2.86012 3
 6 1 2 -1.5902 3.73927 1
 -6 1 -2 -5.6431 4.57852 3
 -7 -1 -2 47.7691 6.32162 2
 7 -1 2 43.8441 6.46512 1
 -7 -1 -2 54.2334 7.29901 3
 7 -1 2 48.9461 5.57201 3
 7 1 2 53.1533 6.66292 1
 -7 1 -2 46.0951 7.20315 3
 8 -1 2 40.6003 7.74263 1
 8 -1 2 38.5831 6.02988 3
 -8 -1 -2 46.1282 8.08559 2
 -8 -1 -2 55.7427 9.20178 3
 8 1 2 42.7499 7.53424 1
 -8 1 -2 35.5016 8.68908 3
 -9 -1 -2 -5.0938 11.1104 3
 9 -1 2 -9.2224 9.57787 1
 9 -1 2 -4.8839 7.82963 3
 -9 1 -2 5.09793 10.3524 3
 -9 1 -2 -0.0919 8.70935 2
 9 1 2 9.54356 9.31097 1
 -9 -2 2 -5.206 9.38429 2
 -9 -2 2 -18.778 10.3042 3
 9 -2 -2 4.46488 8.33491 1
 9 -2 -2 5.08031 7.59683 3
 9 2 -2 -4.1137 8.28983 1
 -9 2 2 13.8157 10.6766 3
 -9 2 2 -6.1326 7.50159 2
 8 -2 -2 16.8014 6.07826 3
 -8 -2 2 31.3351 7.71608 2
 8 -2 -2 11.3379 6.49765 1
 -8 -2 2 15.732 8.66285 3
 8 2 -2 26.4979 6.0438 1
 -8 2 2 19.7545 8.39128 3
 -8 2 2 11.7767 6.19957 2
 -7 -2 2 118.454 9.89316 2
 -7 -2 2 138.511 10.6294 3
 7 -2 -2 117.634 9.48318 1
 7 -2 -2 128.437 8.51635 3
 7 2 -2 116.727 8.5926 1
 -7 2 2 131.826 10.4471 3
 -6 -2 2 10.7424 4.21185 2
 -6 -2 2 13.1487 4.86466 3
 6 -2 -2 5.88093 3.73828 1
 6 -2 -2 5.26653 3.43129 3
 -6 2 2 10.8112 4.79091 3
 6 2 -2 6.84429 3.64223 1
 -5 -2 2 544.045 12.8352 3
 5 -2 -2 554.321 14.2041 1
 5 -2 -2 562.432 12.7452 3
 -5 -2 2 557.571 13.9509 2
 5 2 -2 544.906 14.513 1
 -5 2 2 545.352 13.3007 3
 4 -2 -2 23.6701 3.13186 3
 -4 -2 2 21.299 3.0798 3
 -4 -2 2 21.706 3.12851 2
 -4 2 2 19.4921 3.17989 3
 4 2 -2 15.9057 2.93451 1
 -3 -2 2 660.734 12.6085 3
 -3 -2 2 623.966 13.8303 2
 3 -2 -2 637.468 12.9034 3
 3 2 -2 629.37 13.9707 2
 -3 2 2 655.075 13.0996 3
 3 2 -2 647.227 14.7609 1
 -2 -2 2 1762.24 34.6329 1
 2 -2 -2 1753.65 30.4268 3
 -2 -2 2 1776.45 33.2311 2
 -2 -2 2 1780.59 29.9738 3
 -2 2 2 1762.7 30.4822 3
 2 2 -2 1712.26 33.1631 2
 2 2 -2 1761.67 34.6132 1
 -1 -2 2 2.17678 1.62553 1
 -1 -2 2 2.66992 1.43799 2
 1 2 -2 2.10892 1.57513 1
 1 2 -2 2.93248 1.65277 2
 0 -2 -2 24.0099 2.4011 1
 0 -2 2 23.7346 1.75545 1
 0 -2 -2 29.3408 7.26777 4
 0 2 -2 22.1058 1.58134 1
 0 2 2 34.616 8.5686 4
 0 2 -2 20.4679 1.91989 2
 0 2 -2 36.0954 8.76885 4
 -1 -2 -2 2019.75 39.065 1
 1 -2 2 2020.81 34.1882 3
 -1 -2 -2 2077.35 36.7813 2
 -1 -2 -2 1896.48 81.3358 4
 -1 2 -2 2006.53 34.1666 3
 1 2 2 2054.78 36.7765 2
 -1 2 -2 2059.24 81.9303 4
 1 2 2 2016.48 39.0953 1
 -2 -2 -2 4106.52 72.7036 2
 -2 -2 -2 3867.27 76.1038 1
 2 -2 2 3961.66 66.8518 3
 -2 2 -2 4039.49 66.8838 3
 2 2 2 3985.56 76.1952 1
 3 -2 2 330.89 8.25073 1
 -3 -2 -2 327.477 9.262 1
 3 -2 2 325.239 8.02742 3
 -3 -2 -2 329.531 8.08594 3
 -3 -2 -2 321.664 8.03016 2
 3 2 2 335.94 9.26373 1
 -3 2 -2 343.571 8.42578 3
 -4 -2 -2 182.648 7.60537 1
 4 -2 2 182.039 6.37246 3
 -4 -2 -2 179.278 6.53346 2
 -4 -2 -2 190.646 6.78339 3
 4 -2 2 174.272 6.52627 1
 4 2 2 178.113 7.2082 1
 -4 2 -2 182.376 7.16979 3
 5 -2 2 698.436 16.7045 1
 -5 -2 -2 711.266 16.4264 2
 5 -2 2 709.267 15.5436 3
 -5 -2 -2 689.168 15.6442 3
 -5 -2 -2 696.584 17.6523 1
 -5 2 -2 691.688 15.9096 3
 5 2 2 718.168 17.6542 1
 6 -2 2 12.3234 3.46478 3
 -6 -2 -2 10.0042 4.16917 2
 6 -2 2 7.27958 4.00359 1
 -6 -2 -2 6.76984 4.85976 3
 -6 2 -2 7.41226 5.14319 3
 6 2 2 12.4321 4.0819 1
 7 -2 2 170.667 9.05992 3
 -7 -2 -2 181.234 11.4214 3
 7 -2 2 165.603 10.4772 1
 -7 -2 -2 162.344 10.6617 2
 -7 2 -2 162.176 11.4101 3
 7 2 2 171.294 10.3203 1
 -8 -2 -2 3.05957 7.21863 2
 8 -2 2 6.98199 5.60712 3
 8 -2 2 -2.5963 6.60992 1
 -8 -2 -2 7.72959 8.71781 3
 -8 2 -2 4.82095 7.85547 3
 8 2 2 -6.7072 6.4209 1
 -9 -2 -2 40.2054 12.5108 3
 9 -2 2 31.0612 8.49148 3
 9 -2 2 25.2092 10.587 1
 -9 -2 -2 47.7499 11.167 2
 9 2 2 27.1451 9.44325 1
 -9 2 -2 47.62 11.7314 3
 9 -3 -2 21.1616 8.52617 3
 -9 -3 2 8.45386 9.53246 2
 -9 -3 2 3.27846 11.5281 3
 9 -3 -2 4.16267 9.07329 1
 9 3 -2 -4.6858 7.61082 1
 -9 3 2 -8.8481 6.52877 2
 -9 3 2 -4.7993 11.1348 3
 8 -3 -2 4.2459 5.55684 3
 8 -3 -2 -2.0054 6.16716 1
 -8 -3 2 4.07817 7.19352 2
 -8 -3 2 8.74278 8.50892 3
 8 3 -2 -2.3234 5.4611 1
 -8 3 2 -3.6236 7.84487 3
 -7 -3 2 4.76944 6.3074 3
 -7 -3 2 4.99932 5.64458 2
 7 -3 -2 -8.7618 4.08044 3
 7 -3 -2 -2.0482 4.56877 1
 7 3 -2 -8.4193 3.8473 1
 -7 3 2 6.29916 6.43717 3
 -6 -3 2 30.2742 4.70187 2
 6 -3 -2 20.9347 4.4492 1
 -6 -3 2 27.9948 5.2834 3
 6 -3 -2 25.6003 4.20547 3
 6 3 -2 21.2859 4.24867 1
 -6 3 2 23.2513 5.44056 3
 -5 -3 2 210.471 8.19184 2
 5 -3 -2 216.834 7.64005 3
 -5 -3 2 212.414 7.96847 3
 5 3 -2 194.77 8.45145 1
 -5 3 2 204.947 8.57463 3
 -4 -3 2 646.591 14.958 2
 4 -3 -2 657.101 14.1084 3
 -4 -3 2 645.54 16.1307 1
 -4 -3 2 668.89 13.8094 3
 -4 3 2 664.133 14.4599 3
 4 3 -2 672.577 16.0547 1
 -3 -3 2 189.276 7.12999 1
 -3 -3 2 194.689 6.21984 2
 -3 -3 2 200.3 5.86465 3
 3 -3 -2 196.497 6.2171 3
 3 3 -2 201.304 6.65442 2
 -3 3 2 195.944 6.62411 3
 3 3 -2 180.835 6.76253 1
 -2 -3 2 133.404 5.32772 1
 -2 -3 2 125.138 4.67305 2
 2 -3 -2 124.779 4.59632 3
 2 3 -2 132.596 4.88253 2
 2 3 -2 128.088 5.06156 1
 1 -3 -2 64.5203 12.7999 4
 -1 -3 2 72.0584 3.53418 2
 -1 -3 2 67.9808 3.65239 1
 -1 -3 2 68.609 11.6968 4
 1 3 -2 75.3688 3.56732 1
 1 3 -2 73.5848 3.75611 2
 1 3 -2 55.4674 13.8272 4
 0 -3 -2 24.4686 8.90421 4
 0 -3 -2 14.1375 1.88707 1
 0 -3 2 17.4522 1.68036 1
 0 3 -2 14.9302 1.52028 1
 -1 -3 -2 160.371 5.44675 1
 -1 -3 -2 162.532 4.17296 2
 1 -3 2 162.604 4.70002 3
 1 3 2 165.671 5.47021 1
 1 3 2 174.718 4.29619 2
 1 3 2 168.033 15.0065 4
 -1 3 -2 156.673 14.3122 4
 -2 -3 -2 384.876 9.89355 1
 -2 -3 -2 372.246 22.4066 4
 2 -3 2 369.091 8.52596 3
 -2 -3 -2 380.502 8.17193 2
 -2 3 -2 371.718 8.62255 3
 2 3 2 372.982 8.25355 2
 2 3 2 376.144 9.76433 1
 -3 -3 -2 46.2249 3.53296 2
 -3 -3 -2 46.6938 4.78018 1
 3 -3 2 39.7835 3.9076 3
 -3 3 -2 45.1294 4.57069 3
 3 3 2 42.2371 4.31471 1
 4 -3 2 -4.0594 2.36846 1
 -4 -3 -2 4.56625 2.57681 2
 4 -3 2 -4.0452 2.6182 3
 -4 -3 -2 3.47624 2.76251 3
 -4 -3 -2 9.82415 3.32471 1
 -4 3 -2 5.57087 3.28488 3
 4 3 2 0.32992 2.63006 1
 5 -3 2 53.7246 5.49152 3
 -5 -3 -2 44.2219 4.71628 3
 -5 -3 -2 35.0853 4.92505 1
 5 -3 2 36.9994 4.17559 1
 -5 -3 -2 40.892 4.39444 2
 -5 3 -2 45.9379 5.15842 3
 5 3 2 42.7669 4.7787 1
 -6 -3 -2 166.618 9.0193 2
 6 -3 2 156.706 7.86079 3
 -6 -3 -2 156.942 9.35865 3
 -6 -3 -2 146.742 9.60012 1
 6 -3 2 151.877 8.54649 1
 6 3 2 175.62 8.78679 1
 -6 3 -2 177.608 9.73399 3
 -7 -3 -2 6.73725 6.5367 3
 7 -3 2 20.6631 5.77195 1
 7 -3 2 20.8567 4.99553 3
 -7 -3 -2 23.4781 6.24207 2
 -7 3 -2 29.3333 7.0731 3
 7 3 2 22.83 5.44561 1
 -8 -3 -2 -3.0932 7.20162 2
 8 -3 2 6.72124 5.18153 3
 8 -3 2 -5.1875 6.71058 1
 -8 -3 -2 -3.432 8.46437 3
 8 3 2 -1.4544 6.14606 1
 -8 3 -2 -1.2993 8.35996 3
 -9 -3 -2 10.5771 9.77699 2
 9 -3 2 2.24631 7.5287 3
 -9 -3 -2 13.9881 12.1142 3
 9 -3 2 -8.3396 9.48068 1
 9 3 2 -6.7283 8.25278 1
 -9 3 -2 18.6402 11.7106 3
 9 -4 -2 0.72448 8.24133 3
 -9 -4 2 -3.4358 9.78475 2
 -9 -4 2 19.6104 11.9729 3
 9 -4 -2 4.58785 9.57439 1
 9 4 -2 0.39024 7.82162 1
 -9 4 2 -10.228 11.5714 3
 8 -4 -2 20.6861 7.18154 1
 -8 -4 2 34.1866 8.93208 3
 -8 -4 2 38.4792 8.55595 2
 8 -4 -2 35.747 7.0141 3
 8 4 -2 34.5986 6.61272 1
 -8 4 2 40.2985 9.58635 3
 7 -4 -2 10.022 4.62029 3
 7 -4 -2 2.97307 5.31466 1
 -7 -4 2 0.32383 5.66966 2
 -7 -4 2 2.74645 6.57049 3
 -7 4 2 3.19567 6.35644 3
 7 4 -2 -5.7362 4.59589 1
 -6 -4 2 12.2962 4.59877 2
 6 -4 -2 21.6864 4.6236 3
 -6 -4 2 20.0506 5.15919 3
 6 4 -2 24.0792 4.42526 1
 -6 4 2 20.3428 5.49574 3
 5 -4 -2 393.543 10.8479 3
 -5 -4 2 382.978 10.6913 3
 -5 -4 2 381.247 11.1881 2
 -5 4 2 376.969 11.5043 3
 5 4 -2 372.515 12.0241 1
 -4 -4 2 81.5536 6.38301 1
 -4 -4 2 80.6492 5.47113 3
 4 -4 -2 82.7076 5.26176 3
 -4 -4 2 74.1081 5.19546 2
 4 4 -2 76.5602 6.06036 2
 4 4 -2 75.9177 5.48665 1
 -4 4 2 78.7638 6.27211 3
 -3 -4 2 239.724 8.29386 1
 3 -4 -2 235.763 7.15816 3
 -3 -4 2 241.992 7.20798 2
 3 4 -2 239.167 7.91733 1
 3 4 -2 239.37 7.41624 2
 -2 -4 2 353.732 9.56188 1
 -2 -4 2 350.538 8.80171 2
 2 -4 -2 346.833 8.62827 3
 2 4 -2 354.807 9.00356 2
 2 4 -2 355.463 9.4491 1
 -2 4 2 384.463 25.541 4
 -1 -4 2 1.04772 1.66856 2
 -1 -4 2 0.44184 2.04445 1
 -1 -4 2 3.1578 11.9001 4
 -1 4 2 5.51718 10.7647 4
 1 4 -2 1.10735 1.6982 1
 1 4 -2 3.38332 2.04261 2
 0 -4 2 1232.73 23.5547 1
 0 -4 -2 1173.38 51.9009 4
 0 -4 2 1113.27 52.4196 4
 0 -4 -2 1256.55 24.2698 1
 0 4 -2 1257.62 23.7458 2
 0 4 -2 1257.14 23.5547 1
 0 4 -2 1075.11 52.8836 4
 -1 -4 -2 81.6595 4.49494 1
 -1 -4 -2 91.9673 12.9098 4
 1 -4 2 78.738 4.02979 3
 1 -4 2 86.3005 2.95088 1
 1 4 2 84.8512 3.54786 2
 1 4 2 84.0616 4.28353 1
 1 4 2 79.8816 14.2021 4
 -1 4 -2 64.134 14.3771 4
 2 -4 2 2544.41 43.7481 3
 -2 -4 -2 2661.05 105.886 4
 -2 -4 -2 2498.23 46.8028 2
 -2 -4 -2 2446.77 49.6959 1
 2 4 2 2537.39 49.8917 1
 2 4 2 2489.67 46.7856 2
 -3 -4 -2 448.162 10.2824 2
 -3 -4 -2 455.571 12.2592 1
 3 -4 2 443.137 10.5305 3
 3 4 2 458.071 11.9528 1
 3 4 2 449.928 10.5099 2
 -3 4 -2 460.635 11.0305 3
 -4 -4 -2 116.534 7.11859 1
 4 -4 2 100.446 5.29942 1
 -4 -4 -2 118.093 6.46536 3
 -4 -4 -2 109.899 5.44902 2
 4 -4 2 114.682 6.05891 3
 4 4 2 125.054 6.55569 1
 -4 4 -2 108.933 6.72034 3
 -5 -4 -2 407.76 11.7947 3
 5 -4 2 425.747 11.7362 1
 -5 -4 -2 406.239 13.3813 1
 5 -4 2 419.681 11.4701 3
 -5 -4 -2 420.448 11.4675 2
 -5 4 -2 407.463 12.2852 3
 5 4 2 441.943 12.983 1
 -6 -4 -2 13.5403 5.11692 1
 6 -4 2 14.6546 4.015 3
 6 -4 2 12.5506 4.27181 1
 -6 -4 -2 13.1821 5.19615 3
 -6 -4 -2 14.2607 4.54882 2
 -6 4 -2 19.5948 6.0354 3
 6 4 2 20.8172 4.23242 1
 -7 -4 -2 89.8238 8.70746 3
 7 -4 2 92.9797 8.69894 3
 7 -4 2 97.7934 9.62816 1
 -7 -4 -2 116.919 10.2535 2
 7 4 2 88.9209 8.72883 1
 -7 4 -2 94.8825 8.77221 3
 -8 -4 -2 15.6648 7.89422 2
 8 -4 2 9.30465 7.00201 1
 -8 -4 -2 -8.3243 9.1036 3
 8 -4 2 9.04228 5.88707 3
 -8 4 -2 13.8302 9.2169 3
 8 4 2 24.6176 6.61808 1
 9 -4 2 57.7265 8.47244 3
 9 -4 2 45.226 10.8976 1
 -9 -4 -2 42.1794 10.9408 2
 -9 -4 -2 47.5592 13.3561 3
 -9 4 -2 42.1922 12.5833 3
 9 4 2 59.5835 10.0359 1
 8 -5 -2 -1.4364 5.60361 3
 -8 -5 2 -10.508 8.91179 3
 -8 -5 2 1.05417 7.82124 2
 8 -5 -2 3.63756 7.09041 1
 8 5 -2 0.67601 5.96454 1
 -8 5 2 6.79575 9.40294 3
 7 -5 -2 6.9579 5.38239 1
 7 -5 -2 5.0466 5.20333 3
 -7 -5 2 7.21912 5.67668 2
 -7 -5 2 0.11201 6.92663 3
 7 5 -2 9.10743 5.17934 1
 -7 5 2 -0.7651 6.91634 3
 -6 -5 2 134.669 9.14794 3
 -6 -5 2 140.184 9.05211 2
 6 -5 -2 137.943 8.37562 3
 -6 5 2 134.377 10.4561 3
 6 5 -2 149.228 9.04005 1
 -5 -5 2 6.35377 4.53246 1
 5 -5 -2 9.37779 3.63238 3
 -5 -5 2 2.91746 3.60812 2
 -5 -5 2 8.54195 4.07005 3
 5 5 -2 10.7737 3.58997 1
 -4 -5 2 246.829 8.3002 3
 4 -5 -2 238.773 8.4991 3
 -4 -5 2 238.329 8.2754 2
 -4 -5 2 240.483 9.63857 1
 4 5 -2 248.428 9.181 1
 4 5 -2 260.752 9.06775 2
 3 -5 -2 -3.3621 2.47926 3
 -3 -5 2 3.04945 2.32305 2
 -3 -5 2 1.55451 2.95237 1
 3 5 -2 3.68603 2.7473 1
 3 5 -2 4.21599 2.91578 2
 -2 -5 2 373.058 10.2988 1
 -2 -5 2 368.344 25.6311 4
 2 -5 -2 382.179 9.59063 3
 -2 -5 2 371.724 9.54997 2
 2 5 -2 372.599 9.77418 2
 2 5 -2 396.513 10.2134 1
 -1 -5 2 39.8019 4.13427 1
 1 -5 -2 36.4703 3.35315 1
 1 5 -2 35.8722 3.55479 1
 1 5 -2 39.2545 4.24243 2
 0 -5 -2 9.74115 2.29406 1
 0 -5 2 6.722 2.26288 1
 0 -5 2 34.4834 13.5309 4
 0 -5 -2 10.5802 11.8309 4
 0 5 -2 9.64514 2.73495 2
 0 5 -2 3.50823 1.81277 1
 -1 -5 -2 289.468 8.56434 1
 1 -5 2 287.241 7.68013 3
 1 -5 2 288.592 7.03162 1
 1 5 2 288.822 8.30087 1
 1 5 2 286.678 7.39568 2
 1 5 2 324.823 24.2819 4
 -2 -5 -2 145.811 6.73815 1
 2 -5 2 147.088 5.86573 3
 -2 -5 -2 150.44 5.05061 2
 2 5 2 157.219 5.4958 2
 2 5 2 151.898 6.28059 1
 -3 -5 -2 279.526 7.4926 2
 -3 -5 -2 286.318 9.40699 1
 3 -5 2 258.459 8.15594 3
 3 5 2 268.055 7.80446 2
 3 5 2 274.202 8.95854 1
 -4 -5 -2 13.0557 3.90648 1
 -4 -5 -2 13.0755 2.96919 2
 4 -5 2 17.7199 3.61482 3
 4 5 2 18.2648 3.51722 1
 -4 5 -2 10.9263 4.0745 3
 -5 -5 -2 5.54455 4.33369 3
 5 -5 2 4.22618 3.44572 3
 -5 -5 -2 0.22424 4.0627 1
 -5 -5 -2 3.73336 3.38483 2
 5 -5 2 2.84934 3.15414 1
 -5 5 -2 5.20396 4.70725 3
 5 5 2 1.61453 3.14439 1
 -6 -5 -2 41.6374 6.19011 1
 6 -5 2 39.2232 5.16563 1
 -6 -5 -2 38.7655 5.23486 2
 6 -5 2 42.1785 5.40416 3
 -6 -5 -2 35.2588 6.52837 3
 -6 5 -2 38.8753 6.57857 3
 6 5 2 44.6245 5.4961 1
 -7 -5 -2 6.31585 5.9195 2
 7 -5 2 -5.77 4.25889 3
 -7 -5 -2 10.9326 7.58642 3
 7 -5 2 4.14851 5.69049 1
 7 5 2 22.5787 5.37054 1
 -7 5 -2 11.4148 7.79383 3
 8 -5 2 20.3317 7.80566 1
 8 -5 2 16.678 6.62178 3
 -8 -5 -2 43.9524 10.5208 3
 -8 -5 -2 20.7294 8.20031 2
 -8 5 -2 19.1045 10.2722 3
 8 5 2 29.7497 6.44327 1
 -8 -6 2 77.1408 11.2032 3
 8 -6 -2 74.7465 9.42056 1
 -8 -6 2 86.6931 10.2689 2
 8 -6 -2 89.4653 8.63934 3
 8 6 -2 99.0863 11.5793 1
 7 -6 -2 27.8662 5.92717 3
 -7 -6 2 19.332 6.86585 2
 7 -6 -2 18.7068 6.42945 1
 -7 -6 2 24.4186 7.67908 3
 7 6 -2 23.7053 5.77458 1
 -6 -6 2 8.88936 5.09497 2
 -6 -6 2 10.075 5.99362 3
 6 -6 -2 16.7333 5.00159 3
 6 6 -2 27.796 5.45548 1
 -5 -6 2 225.206 9.50242 2
 5 -6 -2 225.852 9.43121 3
 -5 -6 2 217.917 10.8457 1
 -5 -6 2 234.131 9.84915 3
 5 6 -2 251.031 11.2679 2
 5 6 -2 228.384 10.1647 1
 4 -6 -2 7.16844 3.72866 3
 -4 -6 2 1.96932 3.87993 1
 -4 -6 2 0.90978 3.07019 2
 4 6 -2 4.2291 3.4121 1
 4 6 -2 0.57336 3.95565 2
 -3 -6 2 57.0705 5.05268 2
 -3 -6 2 68.9938 6.47052 1
 3 -6 -2 58.1319 5.3637 3
 3 6 -2 57.2883 6.14261 2
 3 6 -2 69.736 5.83802 1
 -2 -6 2 3.92472 2.40769 2
 2 -6 -2 -3.1008 2.54819 3
 -2 -6 2 0.10676 3.06918 1
 2 6 -2 1.01034 2.27751 1
 2 6 -2 3.43282 2.99057 2
 -1 -6 2 262.502 8.25933 1
 1 -6 -2 262.625 7.78134 1
 1 6 -2 274.642 8.45165 2
 1 6 -2 269.334 7.92012 1
 0 -6 -2 1252.78 26.1045 1
 0 -6 2 1237.15 58.3118 4
 0 -6 2 1244 25.4189 1
 0 6 -2 1255.6 25.3296 1
 0 6 -2 1254.11 25.6771 2
 1 -6 2 77.1192 4.09147 1
 1 -6 2 94.5855 5.11156 3
 -1 -6 -2 78.3202 5.52971 1
 -1 -6 -2 95.1274 18.2069 4
 1 6 2 91.7279 4.80735 2
 1 6 2 72.6598 4.87459 1
 2 -6 2 514.575 11.5025 1
 -2 -6 -2 524.024 13.7738 1
 2 -6 2 526.606 12.2653 3
 2 6 2 532.816 12.1381 2
 2 6 2 533.844 13.658 1
 3 -6 2 157.99 7.10319 3
 -3 -6 -2 167.05 6.24265 2
 -3 -6 -2 182.096 8.36109 1
 3 6 2 178.227 7.52022 1
 3 6 2 167.459 6.64488 2
 4 -6 2 165.54 7.54396 3
 -4 -6 -2 150.637 6.62994 2
 -4 -6 -2 152.477 8.84857 1
 4 6 2 161.703 7.7525 1
 4 6 2 151.146 7.75009 2
 -5 -6 -2 113.094 7.14185 2
 5 -6 2 128.17 7.13352 1
 5 -6 2 117.774 7.65057 3
 -5 -6 -2 134.22 9.25093 3
 -5 -6 -2 121.527 9.61536 1
 5 6 2 121.724 8.1324 1
 -6 -6 -2 58.2706 7.73223 1
 6 -6 2 44.2031 5.73275 3
 -6 -6 -2 35.6175 6.78543 3
 6 -6 2 45.0568 5.46397 1
 -6 -6 -2 42.7232 5.67194 2
 -6 6 -2 37.124 6.75663 3
 6 6 2 43.2044 5.6408 1
 -7 -6 -2 90.3798 9.63436 3
 7 -6 2 119.325 9.41665 3
 -7 -6 -2 87.0875 9.70598 1
 7 -6 2 90.4121 8.09086 1
 -7 -6 -2 100.102 8.45663 2
 7 6 2 80.427 9.34007 1
 -7 6 -2 88.1618 9.70913 3
 8 -6 2 -6.0236 8.14238 1
 -8 -6 -2 7.26291 11.036 3
 8 -6 2 -1.0475 6.8237 3
 -8 -6 -2 1.87756 8.21577 2
 8 6 2 -7.4547 6.49341 1
 -8 6 -2 7.86537 10.3264 3
 -8 -7 2 10.1457 11.5399 3
 -8 -7 2 13.0367 9.48432 2
 8 -7 -2 10.7057 7.90576 3
 8 -7 -2 11.9803 8.8738 1
 8 7 -2 11.2367 7.44667 1
 -7 -7 2 75.1526 8.68939 2
 7 -7 -2 83.5505 7.78143 3
 -7 -7 2 75.9793 9.40971 3
 7 -7 -2 104.669 12.0724 1
 7 7 -2 96.1738 10.9917 1
 6 -7 -2 91.9703 7.85179 3
 -6 -7 2 78.2954 7.83971 3
 -6 -7 2 84.3915 7.62092 2
 6 7 -2 85.101 9.66544 1
 -5 -7 2 136.983 10.5974 1
 5 -7 -2 109.843 8.40809 3
 -5 -7 2 128.132 9.59693 3
 -5 -7 2 124.919 8.66394 2
 5 7 -2 128.286 9.28095 1
 5 7 -2 148.965 11.015 2
 -4 -7 2 148.995 10.033 1
 -4 -7 2 145.984 7.83883 2
 4 -7 -2 128.865 7.95767 3
 4 7 -2 143.346 8.50474 1
 4 7 -2 143.058 8.98233 2
 -3 -7 2 0.74165 3.87108 1
 3 -7 -2 -0.3852 3.09501 3
 -3 -7 2 3.37967 3.14359 2
 3 7 -2 2.79253 3.08846 1
 3 7 -2 0.76051 4.10498 2
 2 -7 -2 276.921 9.12867 3
 2 -7 -2 271.862 8.30542 1
 -2 -7 2 264.318 9.84416 1
 2 7 -2 282.242 9.11513 1
 2 7 -2 257.346 9.51725 2
 -1 -7 2 113.058 6.47556 1
 1 -7 -2 102.022 5.62673 1
 1 7 -2 93.9004 5.27883 1
 1 7 -2 93.5576 6.59344 2
 0 -7 2 2.87683 2.94538 1
 0 -7 -2 8.43293 17.0095 4
 0 -7 -2 2.48833 3.04877 1
 0 7 2 7.48803 3.13954 2
 0 7 -2 9.79921 3.42524 2
 -1 -7 -2 487.789 31.6756 4
 -1 -7 -2 424.317 12.0196 1
 1 -7 2 415.861 10.5241 1
 1 -7 2 405.491 10.9435 3
 1 7 2 425.133 11.6823 1
 1 7 2 433.992 11.0276 2
 2 -7 2 1.7264 3.04352 3
 -2 -7 -2 4.53589 3.8086 1
 2 -7 2 4.48147 2.36651 1
 2 7 2 -3.4766 2.60362 1
 2 7 2 2.45446 3.22535 2
 -3 -7 -2 235.146 9.99422 1
 3 -7 2 222.497 6.70201 1
 3 -7 2 214.884 8.79459 3
 3 7 2 213.512 9.09363 1
 3 7 2 216.24 8.26489 2
 4 -7 2 24.8945 4.5325 3
 -4 -7 -2 24.3136 5.56345 1
 -4 -7 -2 23.2169 3.94283 2
 4 7 2 16.8481 3.84105 1
 4 7 2 22.1528 4.62295 2
 -5 -7 -2 21.1734 6.057 3
 -5 -7 -2 16.712 4.50139 2
 -5 -7 -2 27.7233 5.98179 1
 5 -7 2 16.5777 5.05712 3
 5 7 2 25.3478 4.88209 1
 -6 -7 -2 84.7816 8.52663 3
 -6 -7 -2 77.5441 8.41061 1
 6 -7 2 97.9996 9.22575 3
 6 -7 2 80.7979 8.28293 1
 -6 -7 -2 86.7948 8.99758 2
 6 7 2 75.183 6.86728 1
 7 -7 2 22.7984 6.83383 3
 -7 -7 -2 20.2707 6.96529 2
 -7 -7 -2 26.6733 7.68579 1
 -7 -7 -2 11.6538 9.10654 3
 7 -7 2 23.1381 6.62096 1
 7 7 2 22.9295 5.91107 1
 -7 -8 2 12.7487 8.49947 2
 7 -8 -2 5.02148 7.03329 3
 -7 -8 2 10.3177 9.50835 3
 7 -8 -2 28.3525 8.30712 1
 7 8 -2 2.74691 7.56165 1
 -6 -8 2 4.69669 6.68627 2
 6 -8 -2 -0.1022 5.83449 3
 -6 -8 2 11.9206 7.54491 3
 6 8 -2 3.97514 6.13319 1
 -5 -8 2 8.84416 5.1465 2
 -5 -8 2 7.94674 6.47883 1
 5 -8 -2 3.42298 5.03492 3
 5 8 -2 9.07379 7.01304 2
 5 8 -2 10.135 5.39093 1
 4 -8 -2 9.72656 4.79619 3
 -4 -8 2 4.02727 4.44647 2
 -4 -8 2 11.0544 5.92801 1
 4 8 -2 10.1819 5.60224 2
 4 8 -2 3.94813 4.73115 1
 -3 -8 2 127.565 9.17165 1
 3 -8 -2 100.813 7.66815 3
 3 -8 -2 112.872 6.52222 1
 3 8 -2 136.61 9.1123 2
 3 8 -2 116.729 7.79139 1
 -2 -8 2 175.332 9.58566 1
 2 -8 -2 182.744 7.54812 1
 2 -8 -2 186.161 8.59219 3
 2 8 -2 169.91 9.01879 2
 2 8 -2 182.254 8.21529 1
 1 -8 -2 78.4656 6.3825 1
 -1 -8 2 94.7199 7.28831 1
 1 8 -2 76.1999 7.44211 2
 1 8 -2 66.9818 5.52022 1
 0 -8 2 101.06 6.78693 1
 0 -8 -2 119.788 24.325 4
 0 -8 -2 103.89 7.08588 1
 0 8 -2 102.797 7.94352 2
 0 8 2 109.473 6.82804 2
 1 -8 2 48.714 5.49785 1
 -1 -8 -2 58.9718 5.69497 1
 1 -8 2 47.9996 4.91971 3
 1 8 2 56.5361 5.53309 1
 1 8 2 49.4541 4.77847 2
 2 -8 2 154.325 8.09591 3
 -2 -8 -2 163.803 9.40275 1
 2 -8 2 157.833 6.51906 1
 2 8 2 148.519 7.75562 2
 2 8 2 159.02 7.95543 1
 -3 -8 -2 63.4581 6.81692 1
 3 -8 2 53.0396 5.73907 3
 3 -8 2 61.5647 4.94167 1
 3 8 2 59.6871 5.38926 2
 3 8 2 55.2897 5.54092 1
 -4 -8 -2 100.29 10.2023 1
 4 -8 2 92.7628 8.60661 3
 -4 -8 -2 91.4614 7.41391 2
 4 8 2 100.358 8.70549 2
 4 8 2 79.5792 8.39375 1
 -5 -8 -2 22.4133 5.20489 2
 5 -8 2 32.2647 6.34011 3
 -5 -8 -2 24.8058 7.04908 1
 5 8 2 20.229 5.43597 1
 -6 -8 -2 13.8506 7.47591 1
 6 -8 2 9.89271 5.19143 1
 -6 -8 -2 8.25366 8.23503 3
 6 -8 2 -17.457 5.95821 3
 -6 -8 -2 12.7333 6.1882 2
 6 8 2 11.7142 5.74431 1
 7 -8 2 42.1932 7.69294 1
 7 -8 2 29.5865 8.49252 3
 -7 -8 -2 42.3747 8.52633 2
 -7 -8 -2 30.8309 8.77535 1
 -7 -8 -2 33.9894 11.3115 3
 7 8 2 36.9614 7.82388 1
 -6 -9 2 25.4789 9.41481 3
 6 -9 -2 23.9855 6.94257 3
 -6 -9 2 14.6952 7.65716 2
 6 9 -2 13.3794 7.56604 1
 5 -9 -2 12.3934 5.88545 3
 -5 -9 2 9.17282 7.78439 1
 -5 -9 2 13.9881 6.19994 2
 5 9 -2 17.6067 7.7905 2
 5 9 -2 0.08707 5.81386 1
 -4 -9 2 154.985 13.2521 1
 4 -9 -2 158.155 10.1459 3
 4 -9 -2 155.981 8.55945 1
 4 9 -2 150.671 11.5763 2
 4 9 -2 146.567 10.1918 1
 3 -9 -2 11.9427 5.03936 3
 -3 -9 2 20.6442 5.9886 1
 3 -9 -2 6.93303 3.94147 1
 3 9 -2 4.45014 4.51046 1
 3 9 -2 9.18151 5.72921 2
 2 -9 -2 136.222 8.82798 3
 -2 -9 2 139.834 10.095 1
 2 -9 -2 149.907 8.14982 1
 2 9 -2 146.661 9.86339 2
 2 9 -2 141.272 8.07422 1
 1 -9 -2 113.162 7.96738 1
 -1 -9 2 119.297 9.02332 1
 1 9 -2 114.072 8.77475 2
 1 9 -2 112.424 6.8884 1
 0 -9 2 9.88031 4.45743 1
 0 -9 -2 11.6901 4.76166 1
 0 9 -2 9.76238 5.07503 2
 0 9 2 13.2262 4.80278 2
 1 -9 2 166.332 8.11416 1
 -1 -9 -2 175.526 9.96511 1
 1 -9 2 148.478 8.91092 3
 1 9 2 159.887 8.72576 2
 -1 9 -2 157.207 10.1411 2
 -2 -9 -2 20.3353 5.83594 1
 2 -9 2 17.7513 4.06632 1
 2 -9 2 16.9407 5.10498 3
 2 9 2 13.0823 4.76052 2
 2 9 2 18.2031 4.60531 1
 -3 -9 -2 90.8471 8.60975 1
 3 -9 2 83.357 6.2968 1
 3 -9 2 66.2724 6.75285 3
 3 9 2 76.2148 8.32811 1
 3 9 2 88.4083 6.86306 2
 4 -9 2 68.5332 6.29078 1
 4 -9 2 69.208 7.58352 3
 -4 -9 -2 67.0876 8.39746 1
 4 9 2 62.6514 7.3604 1
 4 9 2 78.5205 7.13052 2
 5 -9 2 -5.3107 6.10222 3
 5 -9 2 -1.1496 3.95373 1
 -5 -9 -2 17.0228 8.05484 1
 5 9 2 -8.0725 5.50931 1
 6 -9 2 65.7219 6.85355 1
 -6 -9 -2 66.1846 11.2248 3
 -6 -9 -2 47.8461 10.2625 1
 -6 -9 -2 51.972 7.98051 2
 6 -9 2 55.5006 8.9746 3
 6 9 2 42.977 8.62982 1
 -6 -10 2 -0.3057 11.0354 3
 6 -10 -2 -1.9008 7.82465 3
 -6 -10 2 10.4591 8.72711 2
 6 10 -2 6.93097 11.9207 2
 6 10 -2 3.52815 8.48629 1
 5 -10 -2 47.0809 6.62673 1
 -5 -10 2 48.9452 10.3643 1
 5 -10 -2 41.4444 8.20471 3
 5 10 -2 45.2775 9.93853 2
 5 10 -2 35.8837 8.46436 1
 4 -10 -2 16.5024 6.53319 3
 -4 -10 2 15.577 8.22075 1
 4 -10 -2 6.87654 5.13717 1
 4 10 -2 12.6891 6.1305 1
 4 10 -2 11.01 7.82523 2
 3 -10 -2 42.1332 6.61227 3
 -3 -10 2 34.8901 7.46448 1
 3 -10 -2 33.7875 5.48406 1
 3 10 -2 27.6351 7.34076 2
 3 10 -2 25.9995 5.83427 1
 -2 -10 2 36.9015 7.0643 1
 2 -10 -2 33.8829 5.72051 1
 2 -10 -2 33.4314 5.97884 3
 2 10 -2 25.9121 6.87604 2
 2 10 -2 25.6202 4.92175 1
 1 -10 -2 7.67524 4.95424 1
 -1 -10 2 4.6022 5.76344 1
 1 10 -2 2.21258 5.67674 2
 -1 10 2 1.24335 5.42161 2
 0 -10 -2 61.9931 6.89689 1
 0 -10 2 84.059 9.20813 1
 0 10 -2 80.3813 7.92042 2
 0 10 2 68.7742 7.00604 2
 -1 -10 -2 6.14637 6.24308 1
 1 -10 2 7.93851 5.41627 3
 1 -10 2 10.8638 5.09608 1
 1 10 2 8.59306 5.35868 2
 -1 10 -2 0.64566 5.8321 2
 2 -10 2 20.8987 5.96715 3
 -2 -10 -2 39.468 7.62139 1
 2 -10 2 28.4136 5.13437 1
 2 10 2 29.8856 5.32561 1
 2 10 2 29.801 6.22627 2
 -3 -10 -2 7.60756 7.56561 1
 3 -10 2 16.8787 4.42496 1
 3 -10 2 3.19934 6.44636 3
 3 10 2 6.89247 6.3156 2
 3 10 2 14.9489 5.62309 1
 4 -10 2 19.5999 7.40635 3
 4 -10 2 30.7025 4.90831 1
 -4 -10 -2 19.2387 8.84476 1
 4 10 2 18.6176 6.30446 1
 4 10 2 39.7768 7.4121 2
 5 -10 2 20.8606 5.1298 1
 -5 -10 -2 17.7356 10.0576 1
 5 -10 2 17.1621 8.3453 3
 5 10 2 6.06118 7.35291 1
 6 -10 2 15.7756 5.60093 1
 -6 -10 -2 1.43145 11.3584 1
 6 -10 2 5.1817 6.19154 1
 6 -10 2 0.32029 9.58912 3
 -6 -10 -2 18.6975 12.4118 3
 6 10 2 -7.3849 8.67292 1
 5 -11 -2 -14.813 9.15212 3
 -5 -11 2 2.16871 10.9397 1
 5 -11 -2 8.67741 7.00123 1
 5 11 -2 5.19992 11.1205 2
 5 11 -2 5.58371 8.74018 1
 4 -11 -2 90.0398 9.77116 3
 4 -11 -2 96.8746 8.30787 1
 -4 -11 2 87.5831 11.7527 1
 4 11 -2 99.5283 9.81284 1
 4 11 -2 95.6672 10.9724 2
 -3 -11 2 15.6339 8.6175 1
 3 -11 -2 0.36634 6.64618 3
 3 -11 -2 7.358 6.31516 1
 3 11 -2 9.95594 8.55216 2
 3 11 -2 13.181 5.99448 1
 2 -11 -2 27.0722 6.47565 1
 -2 -11 2 23.1945 7.7766 1
 2 -11 -2 22.5039 6.99846 3
 2 11 -2 33.6001 5.89323 1
 2 11 -2 41.3553 8.10768 2
 1 -11 -2 44.5638 7.34376 1
 -1 -11 2 53.4581 8.15775 1
 -1 11 2 51.7974 7.5958 2
 1 11 -2 48.1665 7.85399 2
 0 -11 2 30.2165 6.86788 1
 0 -11 -2 29.5574 7.40878 1
 0 11 -2 24.857 7.76402 2
 0 11 2 23.0322 7.04907 2
 1 -11 2 84.8429 7.71347 1
 1 -11 2 70.7374 8.25476 3
 -1 -11 -2 73.468 9.06179 1
 1 11 2 69.0979 7.79502 2
 -1 11 -2 71.3348 8.82469 2
 2 -11 2 59.3424 8.46086 3
 2 -11 2 57.7045 6.68916 1
 -2 -11 -2 80.992 10.0277 1
 -2 11 -2 44.1141 9.08176 2
 2 11 2 50.0323 7.68997 2
 3 -11 2 24.7936 8.09065 3
 3 -11 2 30.4904 5.81698 1
 -3 -11 -2 28.5981 9.71859 1
 3 11 2 34.2103 6.98756 1
 3 11 2 20.3569 7.88576 2
 4 -11 2 30.8863 9.57233 3
 -4 -11 -2 43.3552 10.832 1
 4 -11 2 29.6115 5.62171 1
 4 11 2 37.7239 7.90246 1
 4 11 2 55.7587 9.2068 2
 5 -11 2 2.44698 5.18962 1
 -5 -11 -2 -4.4444 11.6865 1
 5 11 2 8.29799 8.63306 1
 -3 -12 2 23.1051 11.072 1
 3 -12 -2 11.5038 9.46781 3
 3 -12 -2 24.6475 7.93491 1
 3 12 -2 27.1069 10.8261 2
 3 12 -2 28.998 7.6317 1
 2 -12 -2 21.5915 8.28191 1
 -2 -12 2 34.7389 9.52747 1
 2 -12 -2 33.2329 8.95322 3
 -2 12 2 27.4183 9.575 2
 2 12 -2 21.7635 9.77425 2
 1 -12 -2 5.0293 7.75792 3
 -1 -12 2 14.02 8.55783 1
 1 -12 -2 6.10603 8.2108 1
 -1 12 2 18.17 8.85794 2
 1 12 -2 9.09523 8.59352 2
 0 -12 2 8.43969 8.29585 1
 0 -12 -2 2.81552 8.57742 1
 0 12 2 -0.4301 8.16358 2
 0 12 -2 4.34675 8.82802 2
 1 -12 2 3.51674 7.33472 1
 -1 -12 -2 23.7127 9.76133 1
 1 -12 2 6.74649 8.12838 3
 -1 12 -2 1.41013 9.31303 2
 1 12 2 7.23648 7.97897 2
 2 -12 2 20.4474 7.3662 1
 -2 -12 -2 7.64045 9.95874 1
 2 -12 2 6.69655 8.60009 3
 -2 12 -2 12.6266 9.80886 2
 2 12 2 23.3753 8.6853 2
 -3 -12 -2 7.95338 11.156 1
 3 -12 2 9.52849 9.72306 3
 3 12 2 -2.5258 9.2587 2
 0 13 2 9.58495 10.3885 2
 0 13 -2 -13.218 11.0076 2
 9 0 -3 -2.3593 7.59042 3
 -9 0 3 -8.3386 9.65902 3
 -9 0 3 -19.472 8.10814 2
 8 0 -3 1.65682 5.57784 1
 -8 0 3 1.22836 7.8332 3
 -8 0 3 1.71483 5.81572 2
 8 0 -3 1.04605 5.6364 3
 7 0 -3 -9.3348 3.92318 1
 -7 0 3 -5.0898 5.61822 3
 7 0 -3 -1.2342 4.11821 3
 -7 0 3 -1.8072 4.13559 2
 6 0 -3 -3.0776 2.96225 1
 -6 0 3 -2.936 3.23867 2
 6 0 -3 -3.3068 3.10225 3
 -6 0 3 -0.5449 4.29266 3
 -5 0 3 -2.1644 3.37341 3
 5 0 -3 3.62525 2.4597 3
 -5 0 3 -0.6043 2.73235 2
 5 0 -3 0.74556 2.45907 1
 -4 0 3 -1.362 2.55855 3
 4 0 -3 -0.5127 1.90978 3
 -4 0 3 -2.1235 2.28732 2
 4 0 -3 -3.0875 1.97161 1
 -3 0 3 0.3805 2.12729 3
 3 0 -3 -1.0841 1.66833 3
 -3 0 3 0.18225 1.90009 2
 -2 0 3 0.0096 1.71723 2
 2 0 -3 -0.7064 1.41975 3
 -2 0 3 -0.7313 1.55853 3
 1 0 -3 -0.9191 0.83385 3
 1 0 -3 -0.4355 1.13054 2
 -1 0 3 1.05493 0.92626 3
 -1 0 3 -0.4633 1.19574 2
 0 0 -3 -2.1263 0.67234 2
 1 0 3 -0.0474 1.18065 3
 -1 0 -3 -0.9197 1.1671 1
 1 0 3 -0.5975 1.2059 1
 -1 0 -3 -2.0878 1.13399 3
 -2 0 -3 -1.4851 1.7352 1
 2 0 3 0.12027 1.36907 3
 -2 0 -3 -2.6023 1.78617 3
 2 0 3 -0.0125 1.70571 1
 3 0 3 -0.9419 1.92141 1
 -3 0 -3 1.44622 2.34407 3
 -3 0 -3 0.31599 2.13853 1
 3 0 3 0.41192 1.65168 3
 -4 0 -3 0.50815 3.25145 3
 -4 0 -3 0.97424 2.47749 1
 4 0 3 2.15944 2.32002 1
 4 0 3 1.43494 2.08592 3
 5 0 3 3.01221 2.67485 3
 5 0 3 0.83597 3.08675 1
 -5 0 -3 1.64718 3.99185 3
 -6 0 -3 7.11286 5.0279 3
 6 0 3 0.08451 2.91914 3
 6 0 3 -1.6888 3.94382 1
 7 0 3 0.91947 4.29845 3
 7 0 3 4.70718 5.40402 1
 -7 0 -3 5.15242 6.49271 3
 8 0 3 6.32229 5.52529 3
 -8 0 -3 -4.2977 6.47338 2
 8 0 3 -3.3535 6.56269 1
 -8 0 -3 -7.2507 7.89869 3
 9 0 3 -13.088 9.63109 1
 -9 0 -3 -12.967 8.96985 2
 -9 0 -3 0.9982 10.0726 3
 -9 -1 3 13.3224 9.15842 2
 9 -1 -3 5.28503 8.21645 1
 -9 -1 3 -7.5247 10.0006 3
 9 -1 -3 0.47357 7.40619 3
 -9 1 3 17.0925 10.1968 3
 9 1 -3 -10.911 7.19466 1
 -9 1 3 -16.476 7.6242 2
 -8 -1 3 81.0221 8.32591 2
 8 -1 -3 99.0472 8.23651 3
 -8 -1 3 79.4548 8.72043 3
 8 -1 -3 81.9976 8.34695 1
 8 1 -3 74.558 7.34953 3
 -8 1 3 75.7601 8.94615 3
 8 1 -3 68.5877 7.4299 1
 -8 1 3 71.1025 7.80753 2
 7 -1 -3 41.6538 5.30193 3
 7 -1 -3 25.6065 5.39403 1
 -7 -1 3 39.2188 6.7006 3
 -7 -1 3 38.1312 6.24924 2
 7 1 -3 46.7205 5.62934 1
 -7 1 3 49.7707 6.87637 3
 7 1 -3 52.3543 5.56869 3
 -7 1 3 47.6849 6.10603 2
 -6 -1 3 36.7207 5.42057 3
 6 -1 -3 32.1363 4.10575 3
 -6 -1 3 28.1472 4.65895 2
 6 -1 -3 28.4649 4.15789 1
 6 1 -3 30.5841 4.23481 1
 6 1 -3 28.9698 3.96793 3
 -6 1 3 22.8899 4.3832 2
 -6 1 3 23.3982 4.84459 3
 5 -1 -3 512.684 13.3724 1
 -5 -1 3 503.017 13.0683 2
 -5 -1 3 505.879 12.1066 3
 5 -1 -3 494.08 11.6487 3
 5 1 -3 479.387 11.4177 3
 -5 1 3 520.224 12.3129 3
 5 1 -3 492.135 13.3617 1
 -4 -1 3 0.73734 2.67567 3
 -4 -1 3 3.46463 2.42956 2
 4 -1 -3 5.01071 2.29504 3
 4 1 -3 -0.3884 1.86001 3
 -4 1 3 3.05751 2.73577 3
 4 1 -3 -0.1871 2.12707 1
 -3 -1 3 319.944 7.33222 3
 3 -1 -3 323.898 7.50594 3
 -3 -1 3 321.489 8.36991 2
 3 1 -3 314.002 8.69519 1
 3 1 -3 320.651 7.08693 3
 -3 1 3 322.206 7.6936 3
 -2 -1 3 354.518 8.23796 2
 2 -1 -3 350.403 7.36353 3
 -2 -1 3 358.246 7.03308 3
 2 1 -3 349.503 6.93167 3
 2 1 -3 349.282 8.28689 2
 -2 1 3 349.443 7.45955 3
 2 1 -3 353.363 8.58231 1
 -1 -1 3 2529.4 41.0941 3
 -1 -1 3 2461.36 45.7336 2
 1 1 -3 2480.25 45.7405 2
 0 -1 3 2996.67 55.4566 2
 0 -1 3 3011.58 50.3366 3
 0 1 3 3096.98 122.207 4
 0 1 -3 3065.26 55.4717 2
 0 1 -3 3060.37 50.2824 3
 1 -1 3 527.508 9.73948 3
 1 -1 3 533.886 10.4336 1
 -1 -1 -3 523.57 11.2319 1
 -1 1 -3 530.67 9.76573 3
 -1 1 -3 521.381 10.3759 1
 1 1 3 527.303 11.2887 1
 2 -1 3 6850.95 114.282 3
 -2 -1 -3 6888.61 113.859 3
 -2 -1 -3 6880.91 128.848 1
 2 -1 3 6839.27 128.834 1
 -2 1 -3 6813.58 113.206 3
 2 1 3 6859.44 128.884 1
 -2 1 -3 6804.84 128.485 1
 3 -1 3 1206.73 24.5059 1
 -3 -1 -3 1212.82 22.1587 3
 -3 -1 -3 1200.81 25.091 1
 3 1 3 1198.26 25.0865 1
 -3 1 -3 1237.8 22.2723 3
 -4 -1 -3 889.312 17.8291 3
 4 -1 3 885.621 19.4288 1
 4 -1 3 889.275 17.6208 3
 -4 -1 -3 902.966 20.1057 1
 4 1 3 896.564 20.0337 1
 4 1 3 882.695 17.5499 3
 -4 1 -3 910.276 18.0317 3
 5 -1 3 197.521 7.2907 3
 -5 -1 -3 199.536 8.52096 1
 5 -1 3 194.47 7.78504 1
 -5 -1 -3 194.972 8.04443 3
 5 1 3 192.646 7.13727 3
 -5 1 -3 192.956 8.23664 3
 5 1 3 214.556 8.32419 1
 -6 -1 -3 65.3297 6.3989 3
 -6 -1 -3 61.9164 7.0285 2
 6 -1 3 70.7726 6.01626 1
 6 -1 3 72.127 6.26555 3
 6 1 3 70.9117 7.24722 1
 -6 1 -3 64.454 6.27683 3
 -7 -1 -3 284.591 12.975 3
 -7 -1 -3 310.88 12.3607 2
 7 -1 3 295.647 11.0515 3
 7 -1 3 313.122 12.8061 1
 -7 1 -3 291.681 12.8123 3
 7 1 3 296.603 12.6602 1
 8 -1 3 32.7934 8.314 1
 -8 -1 -3 17.904 7.3865 2
 8 -1 3 26.1025 5.74877 3
 -8 -1 -3 34.7537 9.45218 3
 -8 1 -3 40.6024 8.77401 3
 8 1 3 30.3994 8.11098 1
 -9 -1 -3 85.9378 11.3594 2
 9 -1 3 84.3951 9.73434 3
 9 -1 3 86.8585 11.7224 1
 -9 -1 -3 79.8986 12.4737 3
 -9 1 -3 84.3413 12.6387 3
 9 1 3 92.5632 11.315 1
 -9 1 -3 51.7901 10.5143 2
 -9 -2 3 27.9946 10.6221 3
 9 -2 -3 12.371 8.1374 3
 9 -2 -3 -0.6003 8.75205 1
 -9 -2 3 3.85474 9.1448 2
 -9 2 3 18.7447 11.2754 3
 9 2 -3 -8.1076 7.56808 1
 -9 2 3 -4.2906 7.5645 2
 8 -2 -3 3.40588 5.54411 3
 -8 -2 3 -1.047 6.85232 2
 -8 -2 3 0.27941 7.88681 3
 8 -2 -3 -3.9469 5.7205 1
 8 2 -3 4.97966 5.39666 1
 -8 2 3 -8.0806 5.67797 2
 -8 2 3 -0.4046 7.5696 3
 -7 -2 3 33.6839 6.59109 3
 -7 -2 3 20.9362 5.81256 2
 7 -2 -3 22.4439 4.66891 3
 7 -2 -3 26.8763 5.54401 1
 7 2 -3 15.9593 4.46437 1
 -7 2 3 17.5747 6.30784 3
 -6 -2 3 14.2976 4.96793 3
 6 -2 -3 15.9961 4.15407 1
 6 -2 -3 16.6099 3.86747 3
 -6 -2 3 10.8535 4.0032 2
 -6 2 3 14.2924 4.93169 3
 6 2 -3 15.6909 3.79384 1
 5 -2 -3 78.5137 5.60579 3
 -5 -2 3 79.3771 5.98966 3
 -5 -2 3 83.604 6.06908 2
 5 2 -3 85.6713 6.00713 1
 -5 2 3 83.3787 6.60164 3
 4 -2 -3 7.5591 2.66372 3
 -4 -2 3 16.0616 2.84743 3
 -4 -2 3 13.1407 2.78797 2
 -4 2 3 15.6016 3.20931 3
 4 2 -3 9.59667 2.63438 1
 -3 -2 3 49.8458 3.43764 3
 3 -2 -3 53.6175 3.77213 3
 -3 -2 3 58.1875 4.04706 2
 -3 2 3 52.8675 4.16512 3
 3 2 -3 47.4636 4.13146 1
 3 2 -3 60.9237 4.4524 2
 2 -2 -3 120.308 4.19609 3
 -2 -2 3 80.7961 27.1911 4
 -2 -2 3 124.313 4.54242 2
 -2 -2 3 120.065 3.63134 3
 -2 2 3 121.979 4.44416 3
 2 2 -3 121.199 4.57444 2
 2 2 -3 123.361 4.72832 1
 1 -2 -3 88.5073 14.4837 4
 -1 -2 3 91.463 3.62332 2
 1 2 -3 88.8617 3.43652 1
 1 2 -3 92.2164 3.81783 2
 0 -2 -3 764.78 15.5868 1
 0 2 -3 757.341 15.1502 2
 0 2 -3 776.722 14.6957 1
 0 2 3 753.481 33.1605 4
 1 -2 3 3405.12 55.6985 3
 -1 -2 -3 3257.38 63.6014 1
 -1 -2 -3 3520.44 60.4065 2
 -1 2 -3 3390.79 55.693 3
 1 2 3 3291.74 63.6625 1
 1 2 3 3354.11 60.361 2
 -1 2 -3 3172.61 132.924 4
 2 -2 3 1050.63 19.3216 3
 -2 -2 -3 1089.92 20.278 2
 -2 -2 -3 1065.66 22.1284 1
 2 -2 3 1081.67 20.8799 1
 -2 2 -3 1050.75 19.3339 3
 2 2 3 1064.96 22.1545 1
 3 -2 3 160.665 5.32294 1
 -3 -2 -3 170.485 6.59949 1
 -3 -2 -3 165.113 5.24849 2
 3 -2 3 160.73 5.56333 3
 -3 -2 -3 166.457 5.72533 3
 3 2 3 172.393 6.29648 1
 -3 2 -3 164.769 5.99247 3
 -4 -2 -3 16.9171 2.84471 2
 -4 -2 -3 21.3785 3.68604 1
 -4 -2 -3 19.7493 3.13403 3
 4 -2 3 11.8674 2.68096 3
 4 -2 3 12.1832 2.9247 1
 4 2 3 22.2831 3.42122 1
 -4 2 -3 24.3603 3.71478 3
 5 -2 3 11.1456 3.27896 3
 -5 -2 -3 10.8202 3.43416 2
 -5 -2 -3 12.2302 3.74161 3
 -5 -2 -3 10.3648 3.75238 1
 5 -2 3 13.3895 3.56908 1
 -5 2 -3 11.0608 4.09576 3
 5 2 3 15.0118 3.59085 1
 6 -2 3 3.83934 2.99608 3
 -6 -2 -3 -0.6934 4.04417 2
 6 -2 3 -4.7559 3.75297 1
 -6 -2 -3 7.73619 4.93625 3
 6 2 3 -2.7735 3.68197 1
 -6 2 -3 -6.0201 4.69731 3
 7 -2 3 2.66191 4.3144 3
 -7 -2 -3 -6.2078 5.13347 2
 7 -2 3 3.35765 5.41193 1
 -7 -2 -3 8.95424 6.71227 3
 7 2 3 -0.0717 4.93008 1
 -7 2 -3 5.58313 6.36885 3
 -8 -2 -3 12.9348 8.99027 3
 8 -2 3 3.4022 7.27302 1
 8 -2 3 7.46679 5.14765 3
 -8 -2 -3 0.65374 7.37021 2
 8 2 3 10.6226 6.93566 1
 -8 2 -3 1.78931 8.43243 3
 -9 -2 -3 14.5403 10.4478 2
 -9 -2 -3 6.54413 12.9205 3
 9 -2 3 7.89442 7.64644 3
 9 -2 3 -7.9194 9.72178 1
 9 2 3 8.98752 9.63516 1
 -9 2 -3 1.72522 10.6912 3
 -9 -3 3 0.33428 11.2918 3
 9 -3 -3 0.51287 7.73701 3
 9 -3 -3 1.52926 9.03065 1
 -9 -3 3 0.13675 9.53743 2
 9 3 -3 7.30732 7.84833 1
 -9 3 3 -19.749 7.5008 2
 -9 3 3 10.782 11.294 3
 -8 -3 3 94.5727 9.63367 3
 8 -3 -3 66.2482 8.09891 1
 -8 -3 3 81.5676 9.08774 2
 8 -3 -3 74.0349 7.51312 3
 -8 3 3 74.9937 9.42848 3
 8 3 -3 74.4975 7.19642 1
 -7 -3 3 6.41249 6.29539 3
 -7 -3 3 10.7805 5.42544 2
 7 -3 -3 9.86233 4.72509 3
 7 -3 -3 8.37737 5.11947 1
 7 3 -3 7.58555 4.25902 1
 -7 3 3 4.27799 6.18035 3
 6 -3 -3 6.09676 3.67502 3
 -6 -3 3 -1.7909 4.50464 3
 6 -3 -3 14.1616 4.18309 1
 -6 -3 3 4.86288 4.00982 2
 -6 3 3 10.2501 5.03634 3
 6 3 -3 -1.0272 3.49541 1
 5 -3 -3 267.96 8.6855 3
 -5 -3 3 286.981 9.46667 2
 -5 -3 3 269.93 8.78584 3
 5 3 -3 281.549 9.80384 1
 -5 3 3 264.569 9.49528 3
 4 -3 -3 5.51201 2.70778 3
 -4 -3 3 2.17912 2.54439 3
 -4 -3 3 1.55095 2.58869 2
 4 3 -3 4.39309 3.07213 2
 -4 3 3 2.31808 2.96975 3
 4 3 -3 4.0552 2.45177 1
 3 -3 -3 836.047 16.2649 3
 -3 -3 3 821.413 17.453 2
 -3 -3 3 823.526 18.479 1
 -3 -3 3 836.268 15.6116 3
 -3 3 3 813.257 16.3469 3
 3 3 -3 842.554 18.4248 1
 3 3 -3 821.413 17.5308 2
 -2 -3 3 1116.46 22.2139 2
 2 -3 -3 1141.46 20.5889 3
 -2 -3 3 1106.72 23.1441 1
 2 3 -3 1123.4 22.339 2
 2 3 -3 1132.23 23.1344 1
 -1 -3 3 31.0032 3.07322 2
 1 -3 -3 52.7809 13.0603 4
 -1 -3 3 46.3188 10.9331 4
 -1 -3 3 32.4654 3.11097 1
 1 3 -3 32.0322 3.39911 2
 1 3 -3 30.808 2.91994 1
 1 3 -3 33.1483 13.216 4
 0 -3 3 783.481 15.4353 1
 0 -3 -3 803.402 16.4165 1
 0 -3 -3 720.141 34.926 4
 0 3 -3 802.679 16.0387 2
 0 3 -3 815.369 15.4292 1
 -1 -3 -3 760.486 16.4725 1
 1 -3 3 785.769 14.3039 3
 1 3 3 793.71 14.6085 2
 -1 3 -3 686.787 34.688 4
 1 3 3 832.736 35.9965 4
 1 3 3 766.443 16.5043 1
 2 -3 3 3518.6 59.8591 3
 -2 -3 -3 3486.99 68.2973 1
 -2 -3 -3 3548.35 64.6104 2
 2 3 3 3582.82 64.6234 2
 2 3 3 3574.06 68.4633 1
 -2 3 -3 3570.89 59.9183 3
 3 -3 3 0.82535 2.39997 3
 -3 -3 -3 2.16453 1.8421 2
 -3 -3 -3 3.4982 2.77351 1
 3 -3 3 1.84915 1.95711 1
 -3 3 -3 0.34394 2.57804 3
 3 3 3 1.42467 2.2396 1
 4 -3 3 991.86 19.5876 3
 -4 -3 -3 976.698 22.2822 1
 -4 -3 -3 986.745 20.2529 2
 4 -3 3 951.75 20.6698 1
 -4 -3 -3 979.9 19.5454 3
 4 3 3 1007.15 22.2779 1
 -4 3 -3 961.012 19.6434 3
 5 -3 3 883.017 19.9251 1
 -5 -3 -3 879.076 18.8217 3
 5 -3 3 851.98 18.5552 3
 -5 -3 -3 881.182 19.4941 2
 -5 -3 -3 883.73 21.4235 1
 5 3 3 900.642 21.1874 1
 -5 3 -3 870.438 19.0606 3
 6 -3 3 42.5244 5.13211 1
 -6 -3 -3 33.284 5.50989 3
 6 -3 3 37.5682 5.04625 3
 -6 -3 -3 45.0056 5.32291 2
 -6 -3 -3 35.1561 5.47762 1
 6 3 3 48.6899 5.44142 1
 -6 3 -3 39.5103 6.13165 3
 -7 -3 -3 91.4767 8.55778 3
 7 -3 3 78.1577 7.34725 1
 7 -3 3 93.9173 8.14526 3
 -7 -3 -3 97.3347 10.0224 2
 -7 3 -3 72.3046 7.7902 3
 7 3 3 85.0356 7.47664 1
 -8 -3 -3 9.54126 9.04205 3
 8 -3 3 9.53257 5.39396 3
 -8 -3 -3 -4.8931 7.37583 2
 8 -3 3 -3.8547 7.17378 1
 8 3 3 1.97444 6.42271 1
 -8 3 -3 0.76582 8.39641 3
 -9 -3 -3 33.0676 13.0192 3
 -9 -3 -3 27.0458 11.0355 2
 9 -3 3 35.6205 7.63255 3
 9 -3 3 33.1404 11.2253 1
 9 3 3 40.2942 9.98267 1
 -9 3 -3 43.6067 12.6399 3
 9 -4 -3 -1.0491 9.53317 1
 9 -4 -3 7.99551 8.68052 3
 -9 -4 3 -10.62 9.53776 2
 -9 -4 3 8.8651 11.9243 3
 -9 4 3 -11.667 7.26045 2
 -9 4 3 -5.0202 11.8807 3
 9 4 -3 -6.9071 7.21123 1
 8 -4 -3 14.5281 6.88351 1
 8 -4 -3 8.91908 6.16481 3
 -8 -4 3 8.86111 8.7458 3
 -8 -4 3 11.0623 7.57393 2
 8 4 -3 13.7346 6.2161 1
 -8 4 3 5.86481 8.71671 3
 7 -4 -3 5.88272 4.53639 3
 -7 -4 3 -9.8977 6.15872 3
 7 -4 -3 -0.1814 5.08055 1
 -7 -4 3 -1.3723 5.51083 2
 7 4 -3 -0.0778 4.73462 1
 -7 4 3 -1.099 6.39966 3
 -6 -4 3 24.2103 5.13411 2
 -6 -4 3 25.1962 5.4013 3
 6 -4 -3 34.1996 4.75753 3
 -6 4 3 27.8369 6.13931 3
 6 4 -3 18.9901 4.32976 1
 5 -4 -3 61.2675 5.12442 3
 -5 -4 3 50.8286 4.89526 2
 -5 -4 3 42.3418 4.46111 3
 5 4 -3 53.8467 5.78727 1
 -5 4 3 54.8996 5.47006 3
 -4 -4 3 52.7486 4.10105 3
 4 -4 -3 56.1708 4.42999 3
 -4 -4 3 48.3698 4.7346 2
 -4 -4 3 49.7088 5.76716 1
 4 4 -3 49.3605 4.55093 2
 4 4 -3 56.4427 5.06748 1
 -3 -4 3 66.575 4.47037 2
 3 -4 -3 75.2295 4.7072 3
 -3 -4 3 66.6266 5.34181 1
 3 4 -3 68.2647 4.88514 1
 3 4 -3 74.2503 5.09864 2
 -2 -4 3 498.98 11.6016 2
 -2 -4 3 511.624 12.2484 1
 2 -4 -3 511.207 11.153 3
 2 4 -3 507.658 12.1109 1
 2 4 -3 515.161 11.8134 2
 -1 -4 3 55.6226 12.7882 4
 -1 -4 3 57.1508 3.72914 1
 -1 -4 3 54.4306 3.68656 2
 1 -4 -3 66.8761 14.5282 4
 1 4 -3 49.2345 3.94192 2
 -1 4 3 70.2029 13.4334 4
 1 4 -3 58.6342 3.51964 1
 0 -4 3 55.8816 12.2042 4
 0 -4 -3 50.8338 3.61925 1
 0 -4 -3 30.4033 9.8206 4
 0 -4 3 44.9785 2.9097 1
 0 4 -3 43.9354 2.58885 1
 0 4 -3 43.6803 14.9328 4
 0 4 -3 49.3127 3.98049 2
 -1 -4 -3 55.4863 4.1602 1
 1 -4 3 53.7244 3.52837 3
 -1 -4 -3 53.2887 12.5281 4
 1 4 3 57.2876 2.9801 2
 -1 4 -3 57.5579 15.5959 4
 1 4 3 51.4808 3.82414 1
 -2 -4 -3 1330.52 27.9471 1
 2 -4 3 1328.36 24.452 3
 -2 -4 -3 1323.56 25.4181 2
 -2 -4 -3 1379.93 59.5814 4
 -2 4 -3 1322.26 24.4465 3
 2 4 3 1350.18 25.4425 2
 2 4 3 1366.66 28.0783 1
 -3 -4 -3 177.709 5.56051 2
 3 -4 3 188.137 6.60031 3
 -3 -4 -3 199.138 7.7724 1
 3 4 3 188.36 7.17112 1
 -3 4 -3 182.353 7.00794 3
 -4 -4 -3 22.4155 3.92969 1
 4 -4 3 11.9526 2.86945 1
 -4 -4 -3 16.1241 2.928 2
 4 -4 3 10.7663 3.1877 3
 -4 -4 -3 23.0887 3.97015 3
 4 4 3 18.3047 3.52791 1
 -4 4 -3 8.72784 3.8189 3
 5 -4 3 -6.0385 3.07534 3
 5 -4 3 -0.2991 2.87109 1
 -5 -4 -3 0.83903 3.24703 2
 -5 -4 -3 7.02998 3.99414 1
 -5 -4 -3 2.95744 3.94857 3
 5 4 3 8.11465 3.18399 1
 -5 4 -3 3.18406 4.50476 3
 -6 -4 -3 67.1325 6.71304 3
 6 -4 3 61.0441 5.78366 1
 -6 -4 -3 67.21 6.90665 1
 -6 -4 -3 65.9582 5.78645 2
 6 -4 3 62.1644 5.83297 3
 -6 4 -3 70.5729 7.26943 3
 6 4 3 72.7249 7.21586 1
 -7 -4 -3 6.62051 7.043 3
 7 -4 3 -9.2355 4.62299 3
 7 -4 3 -2.9161 5.0804 1
 -7 -4 -3 7.99252 5.59921 2
 -7 4 -3 15.904 7.38542 3
 7 4 3 16.0296 4.93418 1
 -8 -4 -3 18.5565 7.87746 2
 -8 -4 -3 -2.943 9.53629 3
 8 -4 3 11.7384 5.4381 3
 8 -4 3 -2.1545 7.57706 1
 -8 4 -3 13.188 9.5734 3
 8 4 3 0.24776 6.01421 1
 -8 -5 3 28.9368 8.48702 2
 8 -5 -3 35.7203 8.03176 1
 -8 -5 3 33.1968 9.72645 3
 8 -5 -3 33.7854 6.98622 3
 -8 5 3 27.7593 9.38132 3
 8 5 -3 29.7823 6.913 1
 7 -5 -3 -0.3422 5.34844 1
 -7 -5 3 -4.3764 5.77505 2
 -7 -5 3 9.505 6.84383 3
 7 -5 -3 3.38915 5.44115 3
 -7 5 3 -1.5199 7.03753 3
 7 5 -3 4.50696 4.83663 1
 -6 -5 3 64.9638 6.1974 2
 6 -5 -3 64.1983 6.20431 3
 -6 -5 3 57.9226 6.32607 3
 -6 5 3 55.148 6.63468 3
 6 5 -3 74.106 7.7224 1
 -5 -5 3 99.4321 7.45429 3
 5 -5 -3 106.009 7.09183 3
 -5 -5 3 102.613 7.08992 2
 5 5 -3 116.097 8.78958 2
 5 5 -3 100.89 7.25906 1
 4 -5 -3 181.85 7.43353 3
 -4 -5 3 190.159 7.34648 3
 -4 -5 3 181.814 8.43664 1
 -4 -5 3 187.742 7.44442 2
 4 5 -3 193.962 8.08255 1
 4 5 -3 194.668 8.37124 2
 3 -5 -3 310.205 8.88817 3
 -3 -5 3 308.691 8.89727 2
 -3 -5 3 302.437 9.8641 1
 3 5 -3 317.091 9.44672 2
 3 5 -3 322.349 9.65202 1
 -2 -5 3 224.675 7.01149 2
 -2 -5 3 222.031 7.41569 1
 -2 -5 3 190.247 20.1745 4
 2 -5 -3 223.64 7.08954 3
 2 5 -3 218.688 7.19711 1
 2 5 -3 228.584 7.4081 2
 1 -5 -3 101.951 15.6331 4
 1 -5 -3 107.145 4.71604 1
 -1 -5 3 121.785 5.10146 1
 1 5 -3 117.602 4.7078 1
 1 5 -3 117.23 5.43595 2
 0 -5 -3 232.846 19.7966 4
 0 -5 -3 266.743 7.59861 1
 0 -5 3 245.831 20.2075 4
 0 -5 3 263.552 6.77228 1
 0 5 -3 263.668 7.86186 2
 0 5 -3 260.881 6.53946 1
 -1 -5 -3 413.67 10.6638 1
 -1 -5 -3 427.59 25.7309 4
 1 -5 3 390.116 8.80356 1
 1 -5 3 403.812 9.45308 3
 1 5 3 406.999 9.17851 2
 1 5 3 400.902 10.5247 1
 2 -5 3 678.9 14.1729 3
 -2 -5 -3 676.606 13.9379 2
 -2 -5 -3 668.982 16.1107 1
 2 5 3 683.013 14.0479 2
 2 5 3 685.582 16.1373 1
 -3 -5 -3 52.2151 3.79028 2
 -3 -5 -3 52.6782 5.84997 1
 3 -5 3 48.2686 4.76425 3
 3 5 3 43.0291 4.70512 1
 3 5 3 56.5102 4.47897 2
 -4 -5 -3 200.985 6.84139 2
 4 -5 3 210.309 6.77334 1
 4 -5 3 200.707 7.85495 3
 -4 -5 -3 205.474 9.21405 1
 -4 5 -3 199.871 8.57562 3
 4 5 3 211.191 8.32094 1
 5 -5 3 104.83 6.59098 1
 -5 -5 -3 121.27 8.3137 3
 -5 -5 -3 124.757 8.84102 1
 -5 -5 -3 121.098 6.7477 2
 5 -5 3 117.373 6.88987 3
 -5 5 -3 92.5587 8.63611 3
 5 5 3 116.565 7.31136 1
 6 -5 3 11.5408 4.4781 1
 -6 -5 -3 7.33177 5.97149 3
 -6 -5 -3 6.28854 5.40603 1
 6 -5 3 18.148 4.59934 3
 -6 -5 -3 10.3267 4.54212 2
 6 5 3 13.8182 4.48792 1
 -6 5 -3 12.2872 6.02415 3
 7 -5 3 200.294 11.108 1
 -7 -5 -3 179.405 11.4653 2
 -7 -5 -3 176.252 12.3325 1
 -7 -5 -3 165.226 13.3873 3
 7 -5 3 149.704 9.73126 3
 7 5 3 180.915 10.4878 1
 -7 5 -3 193.21 14.2262 3
 8 -5 3 20.3488 6.90009 3
 -8 -5 -3 33.7206 10.5897 3
 -8 -5 -3 15.9551 8.26519 2
 8 -5 3 11.9843 8.02988 1
 -8 5 -3 8.78476 9.83916 3
 8 5 3 -0.0611 6.0735 1
 -8 -6 3 4.90332 8.38315 2
 8 -6 -3 17.732 6.86334 3
 8 -6 -3 -5.3725 7.82948 1
 -8 -6 3 9.86511 9.98516 3
 8 6 -3 5.69078 6.3475 1
 -7 -6 3 11.4478 7.69277 3
 7 -6 -3 2.95634 5.39378 3
 -7 -6 3 -5.0925 6.06891 2
 7 6 -3 10.1089 5.35918 1
 6 -6 -3 2.72798 4.73198 3
 -6 -6 3 -7.1705 4.81919 2
 -6 -6 3 4.64726 5.64051 3
 6 6 -3 1.4795 4.55694 1
 5 -6 -3 22.8315 4.38153 3
 -5 -6 3 19.7817 4.74049 3
 -5 -6 3 9.80277 4.65845 1
 -5 -6 3 16.5006 4.27507 2
 5 6 -3 10.0218 3.97292 1
 5 6 -3 19.4931 5.43793 2
 4 -6 -3 127.03 7.32978 3
 -4 -6 3 132.005 7.1366 2
 -4 -6 3 134.163 8.30923 1
 4 6 -3 133.593 7.92698 2
 4 6 -3 135.061 7.66724 1
 -3 -6 3 214.891 7.88094 2
 3 -6 -3 227.781 8.15758 3
 -3 -6 3 235.358 9.15356 1
 3 6 -3 239.97 8.77233 2
 3 6 -3 242.169 8.76787 1
 -2 -6 3 193.185 7.70115 1
 2 -6 -3 214.622 7.39616 3
 -2 -6 3 200.956 7.04689 2
 2 6 -3 201.874 7.3854 1
 2 6 -3 206.175 7.78444 2
 1 -6 -3 228.663 7.2361 1
 -1 -6 3 228.261 7.54611 1
 1 6 -3 227.714 8.02749 2
 1 6 -3 230.174 7.10837 1
 0 -6 -3 145.609 6.1917 1
 0 -6 3 138.418 5.48902 1
 0 -6 3 166.834 19.0675 4
 0 -6 -3 168.041 20.1626 4
 0 6 -3 154.859 6.61851 2
 0 6 -3 132.633 4.94174 1
 1 -6 3 4.63073 2.56245 3
 1 -6 3 0.9991 1.9644 1
 -1 -6 -3 4.47034 2.82253 1
 -1 -6 -3 2.86447 14.2909 4
 1 6 3 -0.3318 2.25882 2
 1 6 3 0.74805 2.1827 1
 -2 -6 -3 3.47245 3.32716 1
 2 -6 3 6.58597 1.82727 1
 2 -6 3 3.43278 2.93815 3
 2 6 3 1.29586 2.52231 1
 2 6 3 6.92617 2.64747 2
 -3 -6 -3 37.7499 4.15596 2
 -3 -6 -3 50.9047 5.08603 1
 3 -6 3 48.9169 4.46506 3
 3 6 3 40.8893 4.00326 1
 3 6 3 51.1916 4.97687 2
 -4 -6 -3 10.1509 3.12549 2
 -4 -6 -3 13.5492 4.30672 1
 4 -6 3 8.00454 3.93403 3
 4 6 3 -0.9604 2.79901 1
 5 -6 3 6.31651 3.54118 1
 5 -6 3 0.69512 4.047 3
 -5 -6 -3 8.94588 3.76915 2
 -5 -6 -3 10.2622 4.50956 1
 -5 -6 -3 10.0085 5.41287 3
 5 6 3 7.61298 3.64287 1
 -5 6 -3 11.1608 5.60471 3
 -6 -6 -3 48.9514 7.2742 3
 -6 -6 -3 43.833 7.24288 1
 6 -6 3 55.6099 5.70723 1
 6 -6 3 59.9557 6.43773 3
 -6 -6 -3 57.8403 5.87411 2
 -6 6 -3 53.178 7.5064 3
 6 6 3 45.5348 5.66983 1
 -7 -6 -3 6.40206 6.59543 1
 -7 -6 -3 -1.0501 8.06921 3
 7 -6 3 -0.2994 5.18169 3
 7 -6 3 4.42778 5.87713 1
 -7 -6 -3 5.02323 6.0306 2
 -7 6 -3 5.78145 7.92843 3
 7 6 3 -14.027 4.83748 1
 -8 -6 -3 50.9668 9.41079 2
 8 -6 3 31.5326 7.77371 3
 -8 -6 -3 45.4082 12.0923 3
 8 -6 3 36.6754 9.0595 1
 -8 6 -3 49.3892 11.3544 3
 8 6 3 36.067 6.84389 1
 8 -7 -3 26.0114 8.42579 3
 8 -7 -3 32.0622 9.34971 1
 -8 -7 3 33.466 9.85591 2
 -8 -7 3 32.8397 11.7328 3
 8 7 -3 46.8501 8.676 1
 7 -7 -3 48.9242 7.26486 3
 -7 -7 3 37.0285 7.96823 2
 -7 -7 3 49.3327 8.82113 3
 7 7 -3 63.6626 8.0873 1
 6 -7 -3 10.9131 5.16303 3
 -6 -7 3 -0.3937 6.32652 3
 -6 -7 3 4.28488 5.40339 2
 6 7 -3 12.9614 5.53779 1
 -5 -7 3 81.3026 8.15581 2
 5 -7 -3 89.4695 8.3792 3
 -5 -7 3 82.4853 7.57306 1
 -5 -7 3 96.0575 7.30704 3
 5 7 -3 84.8862 8.67419 1
 5 7 -3 91.7537 7.92153 2
 -4 -7 3 12.4159 4.08277 2
 -4 -7 3 6.42779 4.93951 1
 4 -7 -3 11.1766 4.24007 3
 4 7 -3 10.5713 4.89272 2
 4 7 -3 8.86945 4.02017 1
 -3 -7 3 194.832 8.14608 2
 -3 -7 3 180.348 9.10678 1
 3 -7 -3 194.007 8.17843 3
 3 7 -3 200.893 8.62526 1
 3 7 -3 201.558 9.25875 2
 -2 -7 3 22.9741 4.2358 1
 2 -7 -3 16.111 3.04607 1
 2 -7 -3 22.761 3.75178 3
 2 7 -3 20.2077 3.55839 1
 2 7 -3 18.5126 4.06065 2
 1 -7 -3 88.4276 5.72616 1
 -1 -7 3 89.1897 6.04231 1
 1 7 -3 86.5092 5.0385 1
 1 7 -3 85.6541 6.40997 2
 0 -7 3 327.523 9.0455 1
 0 -7 -3 333.249 28.3766 4
 0 -7 -3 330.479 9.98239 1
 0 7 3 307.24 9.13586 2
 0 7 -3 317.674 10.1915 2
 -1 -7 -3 32.6474 19.0231 4
 1 -7 3 1.78319 2.49373 1
 -1 -7 -3 -3.2089 3.17185 1
 1 -7 3 3.67867 2.95122 3
 1 7 3 -0.0088 2.73608 2
 1 7 3 1.33794 2.57921 1
 2 -7 3 232.001 8.37843 3
 -2 -7 -3 241.419 9.46196 1
 2 -7 3 233.999 6.71418 1
 2 7 3 233.461 7.77744 2
 2 7 3 246.255 8.89178 1
 -3 -7 -3 176.59 9.27652 1
 3 -7 3 188.014 8.32979 3
 3 -7 3 173.514 5.64705 1
 3 7 3 178.294 7.32979 2
 3 7 3 174.637 8.49891 1
 -4 -7 -3 65.5205 6.04059 2
 -4 -7 -3 76.0089 8.56965 1
 4 -7 3 72.3224 5.98609 3
 4 7 3 59.1555 6.48029 1
 4 7 3 75.5293 7.38546 2
 -5 -7 -3 52.9944 5.19446 2
 5 -7 3 51.1136 6.35588 3
 -5 -7 -3 40.6006 6.29496 1
 5 -7 3 45.4468 4.54375 1
 5 7 3 44.8312 5.391 1
 6 -7 3 45.5019 5.60344 1
 -6 -7 -3 37.1627 6.09369 2
 -6 -7 -3 46.6014 8.32285 3
 6 -7 3 51.7801 6.59212 3
 -6 -7 -3 52.1088 7.9686 1
 6 7 3 43.8701 5.73472 1
 -7 -7 -3 49.9218 10.1403 3
 -7 -7 -3 64.2871 9.05582 1
 7 -7 3 78.6988 7.73286 1
 7 -7 3 71.2964 8.14069 3
 -7 -7 -3 60.9355 7.87324 2
 7 7 3 57.7658 7.42881 1
 -7 -8 3 38.5643 9.19833 2
 7 -8 -3 13.646 7.4889 3
 -7 -8 3 28.0351 9.72325 3
 7 8 -3 29.4191 8.49891 1
 6 -8 -3 20.9398 6.12765 3
 -6 -8 3 25.677 6.8917 2
 -6 -8 3 17.3488 7.92422 3
 6 8 -3 32.7316 9.12436 2
 6 8 -3 25.5949 6.9049 1
 -5 -8 3 159.274 10.2459 2
 5 -8 -3 146.88 9.94852 3
 -5 -8 3 142.965 12.2286 1
 -5 -8 3 152.847 10.9423 3
 5 8 -3 153.259 12.1405 2
 5 8 -3 158.798 11.0097 1
 -4 -8 3 179.423 11.5223 1
 4 -8 -3 163.155 9.27489 3
 -4 -8 3 169.492 9.27503 2
 4 8 -3 179.145 9.68205 1
 4 8 -3 187.089 11.0113 2
 3 -8 -3 -1.5297 3.71285 3
 3 -8 -3 0.42067 3.25455 1
 -3 -8 3 0.46003 4.8178 1
 3 8 -3 -0.8209 3.70053 1
 3 8 -3 1.66427 4.99015 2
 2 -8 -3 265.943 9.77394 3
 2 -8 -3 254.55 9.18212 1
 -2 -8 3 274.214 10.5466 1
 2 8 -3 258.638 9.41988 1
 2 8 -3 264.418 10.5277 2
 1 -8 -3 29.3203 4.26844 1
 -1 -8 3 30.3165 4.56258 1
 1 8 -3 31.1703 3.66492 1
 1 8 -3 25.8648 4.83918 2
 0 -8 3 45.2184 4.53493 1
 0 -8 -3 47.4296 5.06038 1
 0 8 -3 39.1049 5.04414 2
 0 8 3 49.5369 4.62544 2
 1 -8 3 210.298 7.50526 1
 -1 -8 -3 235.901 28.5141 4
 -1 -8 -3 218.129 9.59722 1
 1 -8 3 222.726 8.90578 3
 1 8 3 210.436 8.1674 2
 -2 -8 -3 6.74575 4.87128 1
 2 -8 3 1.14808 3.92184 3
 2 -8 3 4.373 2.81507 1
 2 8 3 5.7266 3.84164 2
 2 8 3 0.48228 2.96126 1
 3 -8 3 113.494 5.47198 1
 -3 -8 -3 119.849 9.73157 1
 3 -8 3 108.697 8.46147 3
 3 8 3 103.08 7.36116 2
 3 8 3 113.05 7.82148 1
 -4 -8 -3 16.4064 6.01094 1
 4 -8 3 5.95203 4.79274 3
 4 -8 3 14.8773 2.88839 1
 4 8 3 15.4721 4.97664 2
 4 8 3 4.93839 4.3804 1
 5 -8 3 14.267 4.03852 1
 -5 -8 -3 18.1107 6.3418 1
 5 -8 3 16.143 5.84023 3
 -5 -8 -3 10.7133 5.01114 2
 5 8 3 5.93003 4.84859 1
 6 -8 3 59.6322 8.40144 3
 -6 -8 -3 68.9857 9.65176 1
 6 -8 3 71.1174 6.2655 1
 -6 -8 -3 69.6004 7.24542 2
 -6 -8 -3 80.4792 10.2902 3
 6 8 3 68.2259 7.74979 1
 -7 -8 -3 14.193 11.317 3
 7 -8 3 1.63817 8.3363 3
 -7 -8 -3 1.17824 7.74196 2
 7 -8 3 12.0388 6.79503 1
 -7 -8 -3 11.4906 8.89031 1
 7 8 3 4.51961 6.40344 1
 -6 -9 3 6.55766 7.42253 2
 -6 -9 3 7.56312 8.8917 3
 6 -9 -3 0.87064 6.36409 3
 6 9 -3 0.26392 7.26314 1
 6 9 -3 24.7647 10.4291 2
 -5 -9 3 41.3667 7.12659 2
 5 -9 -3 41.302 6.6548 3
 -5 -9 3 22.8374 8.08855 1
 5 9 -3 39.2036 8.65296 2
 5 9 -3 45.0004 7.41566 1
 4 -9 -3 21.1899 5.72761 3
 -4 -9 3 21.0215 7.23987 1
 4 -9 -3 21.9398 4.92277 1
 4 9 -3 15.4807 5.2031 1
 4 9 -3 26.864 6.94349 2
 -3 -9 3 33.7551 6.76654 1
 3 -9 -3 23.936 5.19525 3
 3 -9 -3 25.0219 4.5746 1
 3 9 -3 27.9641 5.07982 1
 3 9 -3 28.4284 6.41524 2
 -2 -9 3 3.81681 4.80567 1
 2 -9 -3 -2.0582 4.10828 3
 2 -9 -3 8.13208 4.1645 1
 2 9 -3 6.73929 3.84933 1
 2 9 -3 8.9952 5.22752 2
 -1 -9 3 1.26185 4.70551 1
 1 -9 -3 5.42389 4.05686 1
 1 9 -3 2.29758 4.84495 2
 1 9 -3 3.26006 3.08926 1
 0 -9 3 49.2894 5.29916 1
 0 -9 -3 43.2692 5.74747 1
 0 9 3 49.2512 5.52075 2
 0 9 -3 44.116 6.21128 2
 1 -9 3 24.3106 4.34937 1
 1 -9 3 22.5813 5.03202 3
 -1 -9 -3 23.8268 5.47766 1
 -1 9 -3 17.0979 5.52181 2
 1 9 3 19.8408 4.67099 2
 2 -9 3 6.08439 3.53083 1
 -2 -9 -3 9.91755 5.85161 1
 2 -9 3 14.2099 4.98777 3
 2 9 3 12.2957 4.66243 2
 2 9 3 9.34446 4.21065 1
 3 -9 3 19.4326 5.94786 3
 3 -9 3 22.2419 3.59437 1
 -3 -9 -3 32.1001 6.79968 1
 3 9 3 19.9481 4.91259 1
 3 9 3 18.2433 5.21337 2
 4 -9 3 96.1277 6.048 1
 4 -9 3 99.8912 8.4821 3
 -4 -9 -3 91.9088 9.70316 1
 4 9 3 100.698 9.90472 1
 4 9 3 95.0961 10.0084 2
 -5 -9 -3 25.7072 8.14958 1
 5 -9 3 12.8916 7.15855 3
 5 -9 3 21.403 4.44779 1
 5 -9 3 27.9096 4.07474 1
 5 9 3 27.7776 7.30502 1
 -6 -9 -3 -4.7919 9.51463 1
 6 -9 3 -25.027 7.32402 3
 -6 -9 -3 8.51735 6.87709 2
 -6 -9 -3 21.9666 10.5727 3
 6 -9 3 -0.2054 5.27253 1
 6 9 3 -18.535 6.89022 1
 -6 -10 3 22.3288 11.2582 3
 -6 -10 3 26.3838 9.20225 2
 6 -10 -3 14.6739 7.87364 3
 6 10 -3 33.124 12.8013 2
 6 10 -3 14.4188 8.81271 1
 -5 -10 3 13.4348 9.16037 1
 5 -10 -3 -12.902 6.50432 3
 5 -10 -3 2.2621 5.98075 1
 5 10 -3 -8.2683 6.93306 1
 5 10 -3 10.4262 9.53252 2
 4 -10 -3 121.068 9.89849 1
 -4 -10 3 131.566 10.9898 1
 4 -10 -3 132.856 11.0241 3
 4 10 -3 124.409 13.4055 2
 4 10 -3 107.098 10.9955 1
 -3 -10 3 4.04931 6.72932 1
 3 -10 -3 3.72816 5.17199 1
 3 -10 -3 -3.7706 5.2047 3
 3 10 -3 -2.3928 4.76245 1
 3 10 -3 8.94268 7.14076 2
 -2 -10 3 136.145 10.9071 1
 2 -10 -3 115.061 9.49077 1
 2 -10 -3 113.056 9.78294 3
 2 10 -3 123.954 11.4227 2
 2 10 -3 97.9026 8.28301 1
 -1 -10 3 41.9257 6.25252 1
 1 -10 -3 33.4369 5.71744 1
 -1 10 3 27.1082 6.06794 2
 1 10 -3 34.0413 6.63574 2
 0 -10 -3 32.4876 6.36656 1
 0 -10 3 32.6459 5.76462 1
 0 10 3 45.3466 6.13796 2
 0 10 -3 26.4863 6.87679 2
 1 -10 3 46.4985 5.7143 1
 -1 -10 -3 38.5324 6.9924 1
 1 -10 3 37.0342 6.44303 3
 1 10 3 39.1653 5.84508 2
 -1 10 -3 34.2465 6.55911 2
 2 -10 3 8.06129 4.42978 1
 2 -10 3 9.23822 5.87748 3
 -2 -10 -3 11.3515 6.91177 1
 2 10 3 9.49101 5.10265 1
 2 10 3 6.14604 5.62866 2
 3 -10 3 62.1104 7.91589 3
 -3 -10 -3 80.9726 9.447 1
 3 -10 3 62.572 5.05749 1
 3 10 3 57.7419 6.91839 1
 3 10 3 75.7278 7.16023 2
 4 -10 3 39.7865 8.24239 3
 -4 -10 -3 39.6681 9.17994 1
 4 10 3 52.8666 7.58074 2
 4 10 3 42.8219 7.22123 1
 -5 -10 -3 15.1249 9.76345 1
 5 -10 3 4.34722 4.34709 1
 5 -10 3 -0.2474 8.1424 3
 5 10 3 9.48231 6.99921 1
 5 -11 -3 -0.189 8.48192 3
 -5 -11 3 -12.488 10.7637 1
 5 -11 -3 2.57609 7.36609 1
 5 11 -3 -0.7238 8.30542 1
 5 11 -3 21.0036 11.4707 2
 4 -11 -3 -9.0685 7.87241 3
 4 -11 -3 11.1939 7.0215 1
 -4 -11 3 5.10698 9.46238 1
 4 11 -3 0.95015 7.2457 1
 4 11 -3 5.31846 9.32635 2
 3 -11 -3 5.08906 6.71953 3
 -3 -11 3 11.2312 8.38222 1
 3 -11 -3 -1.5732 6.19973 1
 3 11 -3 12.0528 8.62559 2
 3 11 -3 4.39694 5.76444 1
 -2 -11 3 94.7436 9.38023 1
 2 -11 -3 86.4144 8.86758 3
 2 -11 -3 83.1044 7.9926 1
 2 11 -3 91.8599 9.41021 2
 2 11 -3 100.674 9.50569 1
 -1 -11 3 18.0412 6.83618 1
 1 -11 -3 7.01383 6.50008 1
 -1 11 3 4.3294 6.44439 2
 1 11 -3 18.5908 7.32153 2
 0 -11 3 5.82006 6.28482 1
 0 -11 -3 1.01831 6.87365 1
 0 11 3 -0.7462 6.27925 2
 0 11 -3 1.84225 7.15167 2
 1 -11 3 7.86287 6.60848 3
 1 -11 3 1.23939 5.58708 1
 -1 -11 -3 -4.4911 7.19469 1
 -1 11 -3 -0.414 7.41731 2
 1 11 3 2.46755 6.2678 2
 -2 -11 -3 20.3465 8.47067 1
 2 -11 3 11.6549 7.37668 3
 2 -11 3 20.205 5.63897 1
 2 11 3 17.9591 6.97077 2
 -2 11 -3 13.4981 7.79625 2
 -3 -11 -3 -8.6067 9.08401 1
 3 -11 3 4.96252 8.00257 3
 3 11 3 -3.7295 7.10011 2
 3 11 3 9.28107 6.13202 1
 -4 -11 -3 10.7568 10.1289 1
 4 -11 3 9.52592 9.29393 3
 4 11 3 17.0155 8.15978 2
 4 11 3 -3.0264 6.77425 1
 3 -12 -3 -3.0278 7.7454 1
 -3 -12 3 0.40191 10.4645 1
 3 -12 -3 -6.4301 8.41367 3
 3 12 -3 11.566 10.6603 2
 3 12 -3 1.88489 7.10671 1
 2 -12 -3 14.856 8.81306 3
 -2 -12 3 32.9019 9.72486 1
 2 -12 -3 30.1957 8.49936 1
 -2 12 3 29.3823 9.51338 2
 2 12 -3 25.1172 9.68009 2
 -1 -12 3 68.2936 9.04846 1
 1 -12 -3 38.3043 8.65958 1
 -1 12 3 53.9461 9.62684 2
 1 12 -3 48.4336 9.65106 2
 0 -12 3 30.5949 8.57908 3
 0 -12 -3 38.8707 9.19489 1
 0 -12 3 50.5447 8.20721 1
 0 12 3 46.9569 8.84168 2
 0 12 -3 37.5704 9.89547 2
 1 -12 3 63.9627 7.92681 1
 1 -12 3 60.4555 9.21315 3
 -1 -12 -3 57.7186 10.0714 1
 1 12 3 55.786 8.80367 2
 -1 12 -3 50.5009 10.5425 2
 -2 -12 -3 14.7661 10.3242 1
 2 -12 3 2.45178 6.47981 1
 2 -12 3 -2.9414 8.68112 3
 2 12 3 7.14583 8.38253 2
 -2 12 -3 -10.976 8.86606 2
 3 -12 3 17.135 10.9458 3
 -3 -12 -3 16.7587 12.2057 1
 3 12 3 13.9884 9.09903 2
 9 0 -4 4.11623 7.30309 1
 -9 0 4 2.38887 9.88175 3
 -9 0 4 -8.5297 8.40728 2
 9 0 -4 -8.0689 7.79494 3
 8 0 -4 98.894 10.3552 1
 -8 0 4 105.196 9.4463 3
 -8 0 4 99.6581 11.161 2
 8 0 -4 105.809 10.2771 3
 7 0 -4 4.56935 3.92226 1
 -7 0 4 1.71252 4.60891 2
 7 0 -4 5.44328 4.08911 3
 -7 0 4 -2.1593 5.37484 3
 -6 0 4 5.45134 3.72201 2
 6 0 -4 14.5961 3.46609 1
 -6 0 4 10.9672 4.42249 3
 6 0 -4 10.9994 3.5847 3
 5 0 -4 166.796 6.27004 3
 -5 0 4 176.953 7.17784 3
 5 0 -4 170.636 7.24213 1
 -5 0 4 167.064 7.31435 2
 -4 0 4 187.572 6.31329 3
 4 0 -4 185.084 5.72073 3
 -4 0 4 179.335 6.70262 2
 -3 0 4 1259.72 25.035 2
 -3 0 4 1251.98 22.3269 3
 3 0 -4 1266.53 22.2913 3
 -2 0 4 562.757 12.0845 2
 -2 0 4 578.2 10.5412 3
 2 0 -4 564.533 12.0749 2
 2 0 -4 567.122 10.4484 3
 -1 0 4 117.299 3.77233 2
 1 0 -4 121.659 2.76272 3
 1 0 -4 118.496 3.71174 2
 0 0 4 152.111 3.69496 2
 0 0 -4 151.99 3.64044 2
 -1 0 -4 5599.6 91.3646 3
 -1 0 -4 5392.75 102.901 1
 1 0 4 5464.02 91.4133 3
 1 0 4 5400.03 103.356 1
 2 0 4 12.1315 1.96783 1
 -2 0 -4 7.65204 1.88051 3
 -2 0 -4 15.6235 2.16071 1
 2 0 4 12.8949 1.99376 3
 -3 0 -4 279.684 7.27821 3
 -3 0 -4 269.443 7.64409 1
 3 0 4 260.714 7.5524 1
 3 0 4 264.06 6.9577 3
 4 0 4 90.3456 4.87123 3
 -4 0 -4 90.9024 5.57262 3
 4 0 4 99.5437 5.42665 1
 -4 0 -4 91.7054 5.60765 1
 -5 0 -4 443.314 11.8071 3
 5 0 4 451.854 12.6472 1
 5 0 4 437.612 11.1801 3
 6 0 4 77.9073 6.32706 3
 -6 0 -4 81.8085 6.97421 3
 6 0 4 82.1129 7.56216 1
 7 0 4 366.17 14.3057 1
 -7 0 -4 382.872 14.2859 3
 7 0 4 360.741 12.1236 3
 8 0 4 30.0889 5.99989 3
 -8 0 -4 26.3786 8.78367 3
 8 0 4 28.2487 8.05893 1
 -8 0 -4 12.8129 7.30383 2
 9 0 4 93.4835 11.9272 1
 -9 0 -4 103.687 12.964 3
 -9 0 -4 83.5094 11.2488 2
 9 -1 -4 -6.4383 7.61861 3
 -9 -1 4 7.53428 8.81513 2
 -9 -1 4 1.92099 10.1933 3
 9 -1 -4 -8.0862 8.19057 1
 -9 1 4 1.20933 10.0661 3
 9 1 -4 -13.914 7.1386 1
 -9 1 4 -12.737 7.45186 2
 -8 -1 4 9.1882 7.43231 3
 8 -1 -4 -8.8544 5.15867 1
 8 -1 -4 5.29165 5.60916 3
 -8 -1 4 12.8301 7.13 2
 -8 1 4 1.93457 7.47004 3
 8 1 -4 5.84379 5.52069 3
 8 1 -4 2.34838 5.32353 1
 -8 1 4 -8.0743 5.45039 2
 -7 -1 4 4.67916 5.12707 2
 7 -1 -4 -2.6016 4.18576 1
 -7 -1 4 7.14755 5.64505 3
 7 -1 -4 7.73438 4.35357 3
 -7 1 4 3.27328 4.43555 2
 -7 1 4 0.36023 5.57368 3
 7 1 -4 4.02406 4.37027 3
 7 1 -4 2.5203 3.93086 1
 -6 -1 4 8.49121 4.6091 3
 6 -1 -4 8.62815 3.50681 1
 6 -1 -4 8.89835 3.23596 3
 -6 -1 4 3.19667 3.98939 2
 6 1 -4 8.54004 3.29367 1
 6 1 -4 6.35457 3.41225 3
 -6 1 4 11.2822 4.55432 3
 -6 1 4 4.85267 3.76346 2
 5 -1 -4 2.01515 2.5531 3
 -5 -1 4 0.23577 2.82731 2
 -5 -1 4 4.23247 3.70542 3
 5 1 -4 4.84511 2.57558 3
 -5 1 4 -1.6158 2.68989 2
 5 1 -4 2.66806 2.57192 1
 -5 1 4 1.37024 3.44404 3
 4 -1 -4 30.7529 3.20946 3
 -4 -1 4 32.0297 3.29855 2
 -4 -1 4 35.8325 3.4278 3
 -4 1 4 35.7022 3.46169 3
 4 1 -4 34.6789 3.63874 1
 4 1 -4 33.0543 3.42498 3
 3 -1 -4 77.2953 3.87454 3
 -3 -1 4 73.867 4.38066 2
 -3 -1 4 76.316 3.8621 3
 3 1 -4 77.6624 3.38195 3
 -3 1 4 80.7901 4.1892 3
 3 1 -4 84.9126 4.8279 2
 3 1 -4 84.9485 4.6007 1
 -2 -1 4 41.264 2.52904 3
 -2 -1 4 43.1664 3.39965 2
 2 -1 -4 46.8052 2.83773 3
 2 1 -4 47.2986 3.65801 2
 2 1 -4 44.5642 2.17167 3
 -2 1 4 44.7182 3.12852 3
 -1 -1 4 6.82232 0.74952 3
 -1 -1 4 5.15191 1.59982 2
 -1 1 4 5.15155 1.47807 2
 1 1 -4 4.39323 1.76728 2
 0 -1 4 77.3049 7.20662 4
 0 -1 -4 82.1326 2.2045 2
 0 -1 4 84.9491 3.22159 2
 0 -1 4 92.1393 2.1127 3
 0 1 4 87.2722 2.28662 2
 0 1 4 97.7899 8.39602 4
 0 1 -4 87.1146 2.08385 3
 0 1 -4 86.3392 3.26935 2
 -1 -1 -4 1396.19 27.7099 1
 1 -1 4 1438.94 26.9362 1
 1 -1 4 1415.24 24.122 3
 -1 1 -4 1397.07 24.1084 3
 1 1 4 1427.48 27.7585 1
 -1 1 -4 1410.22 26.8835 1
 2 -1 4 62.1016 3.1675 1
 -2 -1 -4 66.6455 4.05857 1
 -2 -1 -4 61.6995 3.60872 3
 -2 1 -4 64.2843 3.10382 1
 2 1 4 65.7131 3.98041 1
 -3 -1 -4 17.9399 2.87375 1
 -3 -1 -4 18.6554 2.57875 3
 3 -1 4 17.3718 2.41248 1
 3 -1 4 17.7673 2.37978 3
 3 1 4 16.7639 2.80283 1
 -3 1 -4 16.8351 2.37951 1
 -3 1 -4 16.0984 2.96325 3
 4 -1 4 4.76767 2.57424 1
 -4 -1 -4 4.85877 2.87485 3
 -4 -1 -4 3.67458 2.98346 1
 4 -1 4 1.7989 2.29638 3
 -4 1 -4 5.15353 3.42702 3
 4 1 4 5.01264 2.61448 1
 5 -1 4 7.98183 3.31582 3
 -5 -1 -4 6.26851 3.53505 1
 -5 -1 -4 2.34836 3.7693 3
 5 -1 4 8.46669 3.45571 1
 -5 1 -4 10.098 4.33688 3
 5 1 4 7.48581 3.39891 1
 6 -1 4 -0.4625 4.18938 1
 6 -1 4 7.0356 3.25528 3
 -6 -1 -4 5.80442 5.24064 3
 -6 1 -4 2.17412 5.01196 3
 6 1 4 -4.054 3.98321 1
 -7 -1 -4 31.9695 6.14499 2
 7 -1 4 34.2816 6.39664 1
 7 -1 4 35.9435 5.32059 3
 -7 -1 -4 37.1993 7.18639 3
 7 1 4 36.2771 6.67252 1
 -7 1 -4 43.1521 7.06679 3
 -8 -1 -4 16.2374 8.98085 3
 8 -1 4 1.04154 7.11787 1
 8 -1 4 10.1146 5.50858 3
 -8 -1 -4 -2.8235 6.68682 2
 -8 1 -4 -6.1956 7.39732 3
 8 1 4 6.68467 6.89085 1
 9 -1 4 4.97719 10.1621 1
 -9 -1 -4 7.30628 9.52415 2
 9 -1 4 20.2939 8.09113 3
 -9 -1 -4 18.0457 11.8774 3
 -9 1 -4 15.0866 11.2386 3
 9 1 4 23.1131 9.97345 1
 -9 1 -4 -0.1622 9.41124 2
 -9 -2 4 1.41988 10.1499 3
 9 -2 -4 -0.7709 8.45264 1
 -9 -2 4 14.2577 9.17911 2
 9 -2 -4 -6.2755 7.83917 3
 -9 2 4 -11.064 6.96527 2
 -9 2 4 11.1337 11.1306 3
 9 2 -4 4.01586 7.39235 1
 -8 -2 4 94.145 9.52427 3
 -8 -2 4 89.5471 9.40701 2
 8 -2 -4 82.0972 8.1409 1
 8 -2 -4 89.8242 7.70943 3
 -8 2 4 81.2741 9.48936 3
 -8 2 4 82.3895 8.16593 2
 8 2 -4 69.172 7.44637 1
 -7 -2 4 43.7338 7.00102 3
 7 -2 -4 27.7615 5.61526 1
 7 -2 -4 24.2518 5.02768 3
 -7 -2 4 36.367 6.33531 2
 -7 2 4 29.2131 6.53632 3
 7 2 -4 39.0344 5.10816 1
 -7 2 4 28.4379 5.59431 2
 -6 -2 4 114.895 8.08396 2
 -6 -2 4 117.427 8.21964 3
 6 -2 -4 118.733 7.02466 3
 6 -2 -4 120.522 7.82268 1
 6 2 -4 127.628 7.4878 1
 -6 2 4 122.219 8.44648 3
 5 -2 -4 356.911 9.55052 3
 -5 -2 4 347.976 10.4689 2
 -5 -2 4 345.287 9.75857 3
 5 2 -4 342.569 10.7243 1
 -5 2 4 344.443 10.1887 3
 -4 -2 4 123.514 5.38244 3
 -4 -2 4 127.775 5.80353 2
 4 -2 -4 126.064 5.37528 3
 4 2 -4 121.551 5.92778 1
 -4 2 4 123.321 5.92302 3
 -3 -2 4 484.875 9.71138 3
 3 -2 -4 477.255 10.2409 3
 -3 -2 4 475.916 11.2511 2
 3 2 -4 468.807 11.3724 2
 -3 2 4 483.109 10.4987 3
 3 2 -4 478.584 11.7683 1
 -2 -2 4 35.1518 3.27877 2
 -2 -2 4 33.2199 2.33637 3
 2 -2 -4 30.1004 2.95744 3
 2 2 -4 28.2342 2.6431 2
 2 2 -4 29.5915 3.3632 1
 -1 -2 4 1864.16 35.354 2
 1 2 -4 1902.71 36.2295 1
 1 2 -4 1885.97 35.3857 2
 0 -2 4 75.4699 2.41672 3
 0 -2 -4 70.6076 3.48602 1
 0 2 -4 71.6566 3.64234 2
 0 2 -4 76.9385 2.31629 1
 0 2 4 68.5411 10.0292 4
 1 -2 4 146.517 4.14357 3
 -1 -2 -4 147.089 5.05987 1
 1 2 4 142.975 4.91904 1
 -1 2 -4 151.688 4.14175 3
 -2 -2 -4 2146.94 39.5546 2
 2 -2 4 2159.08 36.9927 3
 -2 -2 -4 2142.06 42.302 1
 2 -2 4 2132.22 40.8858 1
 2 2 4 2166.39 42.3593 1
 -2 2 -4 2172.33 36.997 3
 3 -2 4 398.661 9.16478 3
 -3 -2 -4 411.197 9.41454 3
 -3 -2 -4 394.202 10.5309 1
 -3 -2 -4 384.314 8.9666 2
 3 -2 4 389.579 9.27459 1
 -3 2 -4 398.53 9.36372 3
 3 2 4 382.99 10.4177 1
 4 -2 4 2749.17 54.0272 1
 -4 -2 -4 2813.44 48.6414 3
 4 -2 4 2729.49 48.4925 3
 -4 -2 -4 2812.76 55.2185 1
 -4 -2 -4 2754.43 52.1951 2
 -4 2 -4 2765.88 48.5069 3
 4 2 4 2804.55 55.2682 1
 5 -2 4 408.251 11.5007 1
 -5 -2 -4 403.277 11.3445 3
 5 -2 4 409.065 10.8436 3
 -5 -2 -4 403.163 11.1186 2
 -5 -2 -4 408.402 12.5756 1
 5 2 4 413.843 12.2486 1
 -5 2 -4 399.492 11.3457 3
 6 -2 4 3.12938 3.19754 3
 -6 -2 -4 -4.857 4.19807 2
 -6 -2 -4 3.98594 4.37904 1
 6 -2 4 0.72109 4.02515 1
 -6 -2 -4 5.69301 4.96372 3
 6 2 4 5.31637 3.93919 1
 -6 2 -4 4.47982 5.2641 3
 7 -2 4 170.345 9.33898 3
 -7 -2 -4 189.72 12.0056 3
 7 -2 4 183.72 10.9763 1
 -7 -2 -4 196.871 10.9227 2
 7 2 4 202.95 11.1346 1
 -7 2 -4 188.976 11.887 3
 8 -2 4 -2.3967 7.27454 1
 -8 -2 -4 -0.609 8.40756 3
 8 -2 4 -4.6487 5.1802 3
 -8 -2 -4 -2.8115 7.20301 2
 8 2 4 13.0528 6.75456 1
 -8 2 -4 3.78018 8.55414 3
 -9 -2 -4 63.0525 13.1527 3
 9 -2 4 53.8186 11.6023 1
 -9 -2 -4 52.4379 10.9911 2
 9 -2 4 55.5005 9.15725 3
 9 2 4 55.8479 10.7334 1
 -9 2 -4 46.3786 11.7373 3
 9 -3 -4 6.87393 8.31073 3
 -9 -3 4 -3.8411 10.9822 3
 -9 -3 4 -11.181 9.20562 2
 9 -3 -4 -19.798 8.11287 1
 -9 3 4 8.87113 11.5005 3
 -9 3 4 -7.7457 7.11166 2
 9 3 -4 -10.549 7.24133 1
 8 -3 -4 7.51285 6.09932 3
 -8 -3 4 14.1515 7.192 2
 -8 -3 4 5.17752 8.16606 3
 8 -3 -4 4.42298 6.25174 1
 8 3 -4 -2.8332 4.90616 1
 -8 3 4 8.8945 8.41421 3
 -8 3 4 -9.4089 5.92286 2
 7 -3 -4 -1.6868 4.50361 3
 -7 -3 4 8.78738 5.49424 2
 7 -3 -4 9.56241 5.08226 1
 -7 -3 4 -0.9882 6.0591 3
 7 3 -4 -7.8889 3.70953 1
 -7 3 4 -4.7952 5.84982 3
 6 -3 -4 1.1352 4.03654 3
 -6 -3 4 4.51739 4.89358 3
 -6 -3 4 7.62643 4.38241 2
 -6 3 4 5.44643 4.96741 3
 6 3 -4 -0.233 3.33642 1
 -5 -3 4 68.175 6.04409 3
 5 -3 -4 54.4178 5.52618 3
 -5 -3 4 69.0982 5.90481 2
 5 3 -4 67.1536 5.83163 1
 -5 3 4 56.43 5.16361 3
 4 -3 -4 6.11053 2.71217 3
 -4 -3 4 5.78494 2.74306 2
 -4 -3 4 3.92038 2.55092 3
 4 3 -4 5.75586 2.48543 1
 4 3 -4 3.45723 3.12048 2
 -4 3 4 4.37537 3.05908 3
 2 -3 -4 134.087 4.8072 3
 -2 -3 4 134.802 4.99552 2
 2 3 -4 134.952 5.39517 2
 2 3 -4 127.491 5.01611 1
 -1 -3 4 1.6006 1.73819 2
 -1 -3 4 0.45921 1.69022 1
 1 3 -4 -0.1931 1.9637 2
 1 3 -4 1.31579 1.55909 1
 0 -3 4 50.0953 2.33685 1
 0 -3 -4 53.3159 10.5494 4
 0 -3 -4 46.4473 3.30697 1
 0 3 -4 43.8252 3.73075 2
 0 3 -4 45.0717 2.14726 1
 -1 -3 -4 108.827 4.76377 1
 1 -3 4 111.246 3.8867 3
 -1 -3 -4 82.2459 11.0354 4
 1 3 4 107.656 2.73329 2
 1 3 4 105.667 4.51433 1
 1 3 4 113.353 13.1193 4
 -1 3 -4 104.765 3.9295 3
 2 -3 4 307.846 7.4545 3
 -2 -3 -4 299.753 6.5951 2
 2 -3 4 302.335 6.54125 1
 -2 -3 -4 295.722 8.58814 1
 -2 3 -4 311.53 7.65785 3
 2 3 4 305.25 8.61835 1
 3 -3 4 857.657 17.3988 1
 3 -3 4 833.418 16.6892 3
 -3 -3 -4 832.801 16.9256 2
 -3 -3 -4 863.9 19.2565 1
 3 3 4 845.584 19.1576 1
 -3 3 -4 856.2 16.8303 3
 -4 -3 -4 14.1648 2.77494 2
 -4 -3 -4 14.8286 3.5511 1
 4 -3 4 5.27781 2.76732 1
 4 -3 4 11.1046 3.12076 3
 -4 -3 -4 16.5857 3.53644 3
 -4 3 -4 14.2928 3.68275 3
 4 3 4 12.565 3.11138 1
 -5 -3 -4 2.52046 3.47132 1
 5 -3 4 5.48434 3.25328 3
 5 -3 4 1.13504 3.13423 1
 -5 -3 -4 3.71861 3.70141 3
 -5 -3 -4 3.83446 3.19397 2
 5 3 4 4.33396 3.09392 1
 -5 3 -4 7.32214 4.12419 3
 6 -3 4 79.3818 6.24158 1
 -6 -3 -4 77.8882 7.86916 2
 6 -3 4 59.9032 5.34606 3
 -6 -3 -4 76.8328 8.50126 1
 -6 -3 -4 72.8975 6.73667 3
 6 3 4 93.198 7.55805 1
 -6 3 -4 68.5438 6.84542 3
 7 -3 4 -0.1337 5.49565 1
 -7 -3 -4 10.7284 6.027 2
 -7 -3 -4 11.2427 6.72476 3
 7 -3 4 6.18039 4.75522 3
 -7 3 -4 -0.3902 6.34223 3
 7 3 4 -0.2317 5.02716 1
 -8 -3 -4 5.98399 7.77401 2
 8 -3 4 8.25218 7.9874 1
 -8 -3 -4 6.54529 9.1394 3
 8 -3 4 4.80481 5.86434 3
 -8 3 -4 1.50318 8.20437 3
 8 3 4 -4.0173 6.57754 1
 9 -3 4 -8.0754 7.26567 3
 -9 -3 -4 0.61362 12.9265 3
 9 -3 4 -1.3193 10.5352 1
 -9 -3 -4 5.47089 10.7646 2
 -9 3 -4 2.37189 11.4857 3
 9 3 4 21.5696 9.97875 1
 9 -4 -4 -6.1706 8.73922 1
 -9 -4 4 -11.408 9.60851 2
 -9 -4 4 2.97467 12.1028 3
 9 -4 -4 15.3953 9.17629 3
 9 4 -4 -10.453 7.45942 1
 -9 4 4 7.09939 7.55965 2
 -9 4 4 8.42705 11.5258 3
 8 -4 -4 58.8801 7.93492 3
 -8 -4 4 60.9342 9.4664 3
 -8 -4 4 73.3059 8.97849 2
 8 -4 -4 62.8569 8.56956 1
 8 4 -4 71.2193 7.42079 1
 -8 4 4 75.6374 10.0595 3
 7 -4 -4 25.5158 5.28331 3
 -7 -4 4 19.0534 6.85389 3
 7 -4 -4 24.1762 6.03607 1
 -7 -4 4 16.7261 6.10928 2
 7 4 -4 14.1851 4.90667 1
 -7 4 4 18.4239 6.44941 3
 6 -4 -4 55.2808 5.51425 3
 -6 -4 4 65.2892 5.94586 3
 -6 -4 4 56.841 5.89773 2
 6 4 -4 56.8111 5.74927 1
 -6 4 4 49.8767 6.04701 3
 5 -4 -4 231.885 8.36621 3
 -5 -4 4 218.116 8.71009 2
 -5 -4 4 223.595 8.16046 3
 -5 4 4 228.655 9.35612 3
 5 4 -4 224.201 9.07487 1
 5 4 -4 231.315 9.95829 2
 4 -4 -4 -0.1495 2.64306 3
 -4 -4 4 3.47836 2.77035 2
 -4 -4 4 1.53504 2.72655 3
 4 4 -4 4.84959 3.18638 2
 4 4 -4 0.46183 2.644 1
 3 -4 -4 450.904 10.5951 3
 -3 -4 4 451.329 11.9145 1
 -3 -4 4 441.498 11.0726 2
 3 4 -4 443.354 11.3426 2
 3 4 -4 456.059 11.6953 1
 -2 -4 4 343.937 8.93997 2
 -2 -4 4 344.739 9.33694 1
 2 -4 -4 343.915 8.60037 3
 2 4 -4 343.608 9.18067 2
 2 4 -4 344.755 9.07329 1
 -1 -4 4 172.038 5.53962 1
 -1 -4 4 173.277 5.73444 2
 1 4 -4 167.025 5.92214 2
 -1 4 4 163.136 18.3227 4
 1 4 -4 168.217 5.30677 1
 0 -4 4 138.072 4.11814 1
 0 -4 -4 133.046 5.17382 1
 0 4 -4 132.363 5.51437 2
 0 4 -4 173.789 16.5669 4
 0 4 -4 135.934 3.93141 1
 0 4 4 153.528 17.0042 4
 1 -4 4 44.1727 3.37616 3
 -1 -4 -4 47.078 4.13566 1
 1 4 4 53.3757 3.87247 1
 1 4 4 56.3321 2.66211 2
 -2 -4 -4 1464.81 30.918 1
 -2 -4 -4 1480.15 28.0433 2
 2 -4 4 1515.24 27.0596 3
 2 4 4 1492.32 28.0529 2
 2 4 4 1552.53 31.1966 1
 -2 4 -4 1507.63 27.0836 3
 -3 -4 -4 105.37 6.17896 1
 -3 -4 -4 109.035 4.21358 2
 3 -4 4 100.064 4.01844 1
 3 -4 4 108.378 5.43621 3
 -3 4 -4 102.253 5.86371 3
 3 4 4 105.737 5.75302 1
 -4 -4 -4 844.655 17.7783 3
 4 -4 4 834.36 17.4828 3
 -4 -4 -4 835.59 17.5862 2
 -4 -4 -4 845.303 20.1511 1
 4 -4 4 848.472 17.9269 1
 -4 4 -4 815.897 17.8186 3
 4 4 4 829.349 19.9039 1
 -5 -4 -4 28.6716 4.54983 1
 5 -4 4 24.9084 3.84796 1
 -5 -4 -4 28.4702 3.91041 2
 5 -4 4 29.1568 4.0369 3
 -5 -4 -4 24.8684 4.7302 3
 5 4 4 25.2703 3.72802 1
 -5 4 -4 26.5429 5.08521 3
 6 -4 4 9.68172 4.02823 3
 6 -4 4 16.9141 4.58247 1
 -6 -4 -4 21.3687 4.75438 2
 -6 -4 -4 9.03772 5.54547 3
 -6 -4 -4 8.38023 4.9385 1
 6 4 4 8.7512 3.95147 1
 -6 4 -4 24.9736 5.95829 3
 7 -4 4 185.208 9.93801 3
 -7 -4 -4 196.198 13.1907 3
 -7 -4 -4 173.835 12.1748 1
 7 -4 4 184.231 11.3095 1
 -7 -4 -4 191.514 11.2168 2
 7 4 4 179.995 10.653 1
 -7 4 -4 201.055 13.3354 3
 8 -4 4 18.4241 8.16746 1
 -8 -4 -4 22.6549 8.15432 2
 -8 -4 -4 20.0988 10.0941 3
 8 -4 4 26.7332 6.55662 3
 -8 4 -4 37.2873 10.3002 3
 8 4 4 7.4818 6.40461 1
 -8 -5 4 4.59158 8.97091 3
 -8 -5 4 6.95014 8.11567 2
 8 -5 -4 14.0301 7.67338 1
 8 -5 -4 14.3218 6.58323 3
 8 5 -4 16.9768 6.59418 1
 -8 5 4 11.8651 9.80119 3
 -7 -5 4 6.14052 6.01777 2
 7 -5 -4 5.38274 5.18639 3
 -7 -5 4 5.31051 6.70485 3
 7 5 -4 -3.8958 4.90552 1
 -6 -5 4 17.7558 5.2745 3
 -6 -5 4 20.795 5.21684 2
 6 -5 -4 11.4093 4.80978 3
 6 5 -4 15.9627 4.76899 1
 -5 -5 4 12.2445 4.23109 3
 5 -5 -4 9.18586 3.6924 3
 -5 -5 4 13.1981 3.88519 2
 5 5 -4 15.0829 5.00857 2
 5 5 -4 15.0624 3.96647 1
 -4 -5 4 303.769 8.76677 3
 -4 -5 4 302.288 9.50027 2
 4 -5 -4 293.241 9.31066 3
 4 5 -4 309.662 10.175 2
 4 5 -4 303.348 10.1482 1
 3 -5 -4 144.921 6.29877 3
 -3 -5 4 146.369 7.0971 1
 -3 -5 4 151.69 6.27657 2
 3 5 -4 141.16 6.98259 2
 3 5 -4 145.888 6.5047 1
 -2 -5 4 143.967 6.41185 1
 2 -5 -4 155.301 5.8875 3
 -2 -5 4 144.854 5.85024 2
 2 5 -4 141.957 5.90219 1
 2 5 -4 143.18 6.25244 2
 1 -5 -4 2.70266 1.97813 1
 -1 -5 4 0.01838 2.09272 1
 1 5 -4 0.76565 2.45911 2
 1 5 -4 -2.114 1.80806 1
 0 -5 4 605.259 13.1475 1
 0 -5 -4 639.236 14.4926 1
 0 5 -4 630.689 14.3179 2
 0 5 -4 626.61 13.0783 1
 1 -5 4 524.373 11.3281 1
 1 -5 4 577.51 11.8445 3
 -1 -5 -4 569.886 13.6711 1
 1 5 4 583.374 11.678 2
 1 5 4 561.59 13.5557 1
 2 -5 4 185.311 6.35894 3
 -2 -5 -4 183.822 7.35181 1
 2 5 4 180.314 7.0675 1
 2 5 4 180.617 5.28877 2
 -3 -5 -4 51.0088 5.81932 1
 -3 -5 -4 82.9235 19.1071 4
 -3 -5 -4 56.916 3.65959 2
 3 -5 4 58.6244 4.56215 3
 3 -5 4 49.9143 3.18955 1
 3 5 4 51.2162 4.90641 1
 -3 5 -4 57.6695 4.84605 3
 4 -5 4 5.61955 2.57365 1
 -4 -5 -4 8.26321 2.79893 2
 4 -5 4 3.45398 3.43494 3
 -4 -5 -4 8.52502 3.9852 1
 -4 5 -4 12.5632 4.15219 3
 4 5 4 4.52092 2.97021 1
 -5 -5 -4 22.055 4.86634 3
 5 -5 4 15.4258 4.00968 3
 -5 -5 -4 14.0796 4.70233 1
 -5 -5 -4 25.8353 3.85655 2
 5 -5 4 16.5484 3.7532 1
 5 5 4 10.5462 3.41655 1
 -5 5 -4 14.2997 5.07894 3
 -6 -5 -4 52.1936 5.75151 2
 6 -5 4 59.7665 5.66612 1
 -6 -5 -4 55.1299 7.2539 1
 -6 -5 -4 52.7788 7.05868 3
 6 -5 4 57.0315 6.11283 3
 -6 5 -4 59.1755 7.47308 3
 6 5 4 64.5003 6.21862 1
 -7 -5 -4 -1.7134 5.90503 2
 -7 -5 -4 -3.3227 7.44994 3
 7 -5 4 -8.4791 5.74591 1
 -7 -5 -4 12.4855 6.80621 1
 7 -5 4 5.96261 5.10901 3
 -7 5 -4 3.60266 7.74147 3
 7 5 4 -0.3205 4.65136 1
 -8 -5 -4 79.3584 9.49315 2
 8 -5 4 76.9913 9.36564 1
 -8 -5 -4 68.2192 11.6605 3
 8 -5 4 69.8159 8.02003 3
 8 5 4 68.3029 8.56614 1
 -8 5 -4 81.5154 11.8688 3
 -8 -6 4 56.562 10.6911 3
 8 -6 -4 82.1835 9.66572 1
 8 -6 -4 93.3084 9.74681 3
 -8 -6 4 60.3003 9.58441 2
 8 6 -4 78.8764 8.60309 1
 7 -6 -4 21.1955 6.03235 3
 -7 -6 4 6.85496 6.54569 2
 -7 -6 4 16.4748 7.57865 3
 7 6 -4 14.1549 6.27804 1
 6 -6 -4 114.954 8.77186 3
 -6 -6 4 97.4404 9.26368 2
 -6 -6 4 96.705 9.50629 3
 6 6 -4 100.161 9.10068 1
 5 -6 -4 2.98573 4.2109 3
 -5 -6 4 1.06615 4.10656 2
 -5 -6 4 5.64034 4.55259 3
 5 6 -4 6.97667 5.49109 2
 5 6 -4 -0.4882 3.87421 1
 -4 -6 4 72.6207 6.2912 2
 4 -6 -4 65.4227 6.21165 3
 -4 -6 4 68.7833 7.40151 1
 4 6 -4 67.6853 7.58147 2
 4 6 -4 67.2205 6.64753 1
 3 -6 -4 193.589 7.69692 3
 -3 -6 4 198.877 8.53851 1
 -3 -6 4 194.866 7.58779 2
 3 6 -4 200.164 8.06461 1
 3 6 -4 205.436 8.61445 2
 -2 -6 4 55.5358 5.63572 1
 -2 -6 4 58.8558 4.8111 2
 2 6 -4 60.873 5.93498 2
 2 6 -4 55.2832 4.91685 1
 1 -6 -4 25.4582 3.02318 1
 1 -6 -4 17.6081 14.8616 4
 -1 -6 4 26.2647 3.29759 1
 1 6 -4 24.7378 2.80729 1
 1 6 -4 26.2194 3.67091 2
 0 -6 4 694.434 14.3706 1
 0 -6 -4 677.204 15.6527 1
 0 -6 4 660.377 36.3445 4
 0 -6 -4 557.199 36.6351 4
 0 6 -4 672.291 14.1706 1
 0 6 -4 692.545 15.627 2
 -1 -6 -4 27.7059 14.2164 4
 -1 -6 -4 26.9155 3.61018 1
 1 -6 4 27.2417 3.28352 3
 1 -6 4 26.195 2.97676 1
 1 6 4 26.3439 2.73834 2
 1 6 4 23.7334 3.07905 1
 -2 -6 -4 269.58 9.28349 1
 2 -6 4 247.4 8.00285 3
 2 6 4 270.826 8.901 1
 2 6 4 259.928 7.17127 2
 -3 -6 -4 5.13992 2.31859 2
 -3 -6 -4 10.7909 3.62759 1
 3 -6 4 13.8205 3.5632 3
 3 6 4 9.81581 2.93842 2
 -4 -6 -4 66.4778 7.4447 1
 -4 -6 -4 64.1816 5.24316 2
 4 -6 4 78.5315 6.50839 3
 4 -6 4 69.3629 4.71278 1
 4 6 4 72.5712 6.23852 1
 5 -6 4 115.215 7.87696 3
 -5 -6 -4 105.412 6.83712 2
 -5 -6 -4 120.976 9.30528 1
 -5 -6 -4 113.775 9.43591 3
 5 -6 4 107.245 6.40547 1
 5 6 4 99.4645 7.50608 1
 -5 6 -4 119.323 9.90621 3
 6 -6 4 26.188 5.60442 3
 -6 -6 -4 20.1149 6.29008 1
 6 -6 4 23.8457 4.84105 1
 -6 -6 -4 20.9371 6.75113 3
 -6 -6 -4 18.2718 4.83676 2
 6 6 4 10.7017 4.48233 1
 -6 6 -4 16.9886 6.97918 3
 -7 -6 -4 9.90452 8.65337 3
 7 -6 4 -1.0498 5.47753 3
 7 -6 4 8.58507 6.362 1
 -7 -6 -4 14.0052 6.32097 2
 -7 -6 -4 12.4579 7.17131 1
 -7 6 -4 20.0713 8.99654 3
 7 6 4 14.7568 5.42441 1
 8 -6 4 -11.171 7.21812 3
 -8 -6 -4 2.89862 11.7138 3
 -8 -6 -4 -2.7349 8.13726 2
 8 -6 4 -2.0195 8.45622 1
 8 6 4 -7.6182 6.46029 1
 -8 6 -4 10.7452 11.5298 3
 8 -7 -4 6.2369 8.96595 1
 -8 -7 4 24.582 11.461 3
 8 -7 -4 -5.1608 8.40572 3
 -8 -7 4 0.51312 9.28946 2
 8 7 -4 10.472 8.10697 1
 -7 -7 4 32.9868 8.7104 3
 -7 -7 4 42.657 7.9689 2
 7 -7 -4 22.6308 7.00784 3
 7 7 -4 47.5076 7.6201 1
 -6 -7 4 30.2215 6.98754 3
 6 -7 -4 30.8809 6.12217 3
 -6 -7 4 25.893 6.48918 2
 6 7 -4 35.3831 8.34836 2
 6 7 -4 24.6397 5.75118 1
 -5 -7 4 2.19955 5.29709 3
 -5 -7 4 7.91566 4.6723 2
 5 -7 -4 3.74798 4.209 3
 5 7 -4 4.53724 5.94404 2
 5 7 -4 1.88059 4.87827 1
 -4 -7 4 -2.9255 3.74382 2
 -4 -7 4 3.41287 4.65062 1
 4 -7 -4 4.74599 4.25697 3
 4 7 -4 1.63319 4.69569 2
 4 7 -4 6.09006 4.30724 1
 -3 -7 4 139.261 7.72248 2
 -3 -7 4 156.602 8.9514 1
 3 -7 -4 148.019 7.54944 3
 3 7 -4 148.252 7.68515 1
 3 7 -4 154.786 8.78192 2
 2 -7 -4 232.143 8.07991 1
 -2 -7 4 231.527 8.87451 1
 2 7 -4 233.201 9.11233 2
 2 7 -4 226.442 8.2614 1
 1 -7 -4 142.785 6.64362 1
 -1 -7 4 152.214 6.65794 1
 1 7 -4 128.733 5.89122 1
 1 7 -4 140.336 7.5211 2
 0 -7 -4 52.471 5.65226 1
 0 -7 -4 76.4653 21.0402 4
 0 -7 4 46.4404 4.76705 1
 0 7 4 50.1881 5.00158 2
 0 7 -4 63.9265 6.52864 2
 1 -7 4 163.243 7.04615 3
 -1 -7 -4 158.726 7.58926 1
 1 -7 4 162.63 5.59019 1
 1 7 4 162.323 7.04743 1
 1 7 4 157.851 6.2754 2
 2 -7 4 4.75307 3.30151 3
 2 -7 4 2.02317 2.0362 1
 -2 -7 -4 2.99485 3.71182 1
 2 7 4 2.05792 3.0025 2
 2 7 4 5.91314 2.92097 1
 3 -7 4 192.993 8.5141 3
 -3 -7 -4 207.81 9.7207 1
 3 -7 4 204.651 5.70745 1
 3 7 4 211.136 7.57133 2
 3 7 4 219.038 9.20359 1
 -4 -7 -4 15.635 5.19597 1
 4 -7 4 13.4864 2.7589 1
 -4 -7 -4 8.96463 3.49983 2
 4 -7 4 12.3284 4.62719 3
 4 7 4 14.4275 4.3828 1
 -5 -7 -4 47.9856 6.67425 1
 5 -7 4 25.7465 5.59422 3
 5 -7 4 33.8323 4.15403 1
 -5 -7 -4 36.9006 4.99616 2
 5 7 4 31.9971 5.02857 1
 6 -7 4 23.2182 5.01628 1
 6 -7 4 32.1904 6.33501 3
 -6 -7 -4 16.4634 5.56477 2
 -6 -7 -4 21.3633 6.98508 1
 -6 -7 -4 21.9994 7.84129 3
 6 7 4 11.6012 5.32989 1
 -7 -7 -4 -7.9624 9.80383 3
 -7 -7 -4 5.2246 7.33963 1
 7 -7 4 10.758 6.21726 3
 7 -7 4 -3.1088 6.35094 1
 -7 -7 -4 5.56948 6.94594 2
 7 7 4 -6.0135 5.80184 1
 -7 -8 4 26.7747 9.55485 3
 7 -8 -4 29.5968 7.66323 3
 -7 -8 4 38.3935 9.22019 2
 7 8 -4 43.2624 8.8429 1
 6 -8 -4 -1.0882 5.81993 3
 -6 -8 4 15.1665 6.74662 2
 -6 -8 4 9.89739 7.39825 3
 6 8 -4 20.7865 9.08346 2
 6 8 -4 -1.1573 6.30211 1
 -5 -8 4 48.7854 6.55366 2
 -5 -8 4 33.4783 6.73192 3
 -5 -8 4 125.688 93.5294 4
 5 -8 -4 57.1912 6.85823 3
 5 8 -4 46.8474 6.55085 1
 5 8 -4 50.1485 7.79548 2
 -4 -8 4 73.4715 8.34457 2
 4 -8 -4 97.3386 8.0473 3
 -4 -8 4 97.3531 10.3452 1
 4 8 -4 83.4389 7.50474 2
 4 8 -4 103.945 8.6488 1
 -3 -8 4 271.387 11.3161 1
 3 -8 -4 278.905 10.2595 3
 3 -8 -4 260.664 9.44244 1
 3 8 -4 262.543 10.4133 1
 3 8 -4 265.454 11.764 2
 -2 -8 4 128.497 8.40527 1
 2 -8 -4 129.182 7.29067 1
 2 8 -4 131.506 8.85747 2
 2 8 -4 129.784 7.16709 1
 -1 -8 4 88.5021 6.83195 1
 1 -8 -4 85.2338 6.69686 1
 1 8 -4 82.1734 5.4743 1
 1 8 -4 75.2349 7.49082 2
 0 -8 4 49.8272 5.75712 1
 0 -8 -4 60.1922 5.46167 1
 0 8 4 57.856 5.8827 2
 0 8 -4 54.7131 5.89863 2
 -1 -8 -4 19.0726 19.3271 4
 -1 -8 -4 9.14536 4.41365 1
 1 -8 4 15.0015 3.14897 1
 1 -8 4 10.804 4.03461 3
 -1 8 -4 6.5686 4.34032 2
 1 8 4 9.08525 3.49991 2
 2 -8 4 48.6957 5.51205 3
 -2 -8 -4 53.0234 6.06978 1
 2 -8 4 45.9579 4.37569 1
 2 8 4 56.5949 4.72651 2
 2 8 4 48.8165 5.05988 1
 3 -8 4 114.187 8.65054 3
 -3 -8 -4 112.466 9.69181 1
 3 8 4 108.421 7.10645 2
 3 8 4 119.82 8.09606 1
 -4 -8 -4 26.3367 6.43059 1
 4 -8 4 33.0608 3.24283 1
 4 -8 4 29.601 5.8103 3
 4 -8 4 31.5218 3.03141 1
 4 8 4 31.7235 5.20726 2
 4 8 4 30.7898 5.7399 1
 5 -8 4 28.8775 4.01257 1
 5 -8 4 20.512 6.47127 3
 -5 -8 -4 30.5799 6.9567 1
 -5 -8 -4 25.1344 5.20603 2
 5 8 4 20.0052 5.44244 1
 6 -8 4 44.3806 7.72763 3
 6 -8 4 23.3482 5.23009 1
 -6 -8 -4 25.0463 9.18463 3
 -6 -8 -4 32.3352 6.46899 2
 -6 -8 -4 19.0269 8.14739 1
 6 8 4 13.8041 5.76824 1
 -7 -8 -4 26.1533 9.72274 1
 7 -8 4 32.8287 8.66336 3
 -7 -8 -4 24.9244 8.32376 2
 -7 -8 -4 26.4149 11.8556 3
 7 -8 4 24.5911 7.16423 1
 7 8 4 6.94909 6.53825 1
 6 -9 -4 1.38922 7.17505 3
 -6 -9 4 8.50853 8.57818 3
 -6 -9 4 13.7913 7.66743 2
 6 9 -4 13.1594 7.84707 1
 6 9 -4 17.2311 10.2706 2
 -5 -9 4 0.90056 6.18887 2
 -5 -9 4 63.3673 104.231 4
 5 -9 -4 18.203 6.05827 3
 5 9 -4 10.1496 7.79993 2
 5 9 -4 6.13438 6.26627 1
 -4 -9 4 166.123 12.9202 1
 4 -9 -4 155.198 10.154 3
 4 9 -4 146.841 12.2984 2
 4 9 -4 164.67 10.6653 1
 3 -9 -4 23.5955 5.14377 3
 -3 -9 4 23.9183 6.33339 1
 3 -9 -4 26.9891 4.75101 1
 3 9 -4 26.7747 4.95077 1
 3 9 -4 30.2842 6.67276 2
 2 -9 -4 71.1386 6.19858 3
 -2 -9 4 69.8623 6.63256 1
 2 -9 -4 66.4773 5.9359 1
 2 9 -4 57.702 6.51749 1
 2 9 -4 73.2446 7.15011 2
 -1 -9 4 12.7114 4.71764 1
 1 -9 -4 10.9985 4.4473 1
 1 9 -4 11.0875 5.31743 2
 1 9 -4 11.4725 3.34733 1
 0 -9 4 89.6719 7.40159 1
 0 -9 -4 97.0606 8.40503 1
 0 9 4 95.6595 7.97295 2
 0 9 -4 96.6061 9.4458 2
 1 -9 4 148.119 7.15598 1
 1 -9 4 136.977 8.77113 3
 -1 -9 -4 138.605 9.57119 1
 1 9 4 138.854 7.91501 2
 -1 9 -4 137.301 10.1112 2
 2 -9 4 1.93815 3.22622 1
 2 -9 4 -2.8049 4.81022 3
 -2 -9 -4 -0.7982 5.52027 1
 2 9 4 -0.7397 3.70806 1
 2 9 4 0.47034 4.29533 2
 -3 -9 -4 89.6544 8.58847 1
 3 -9 4 89.4386 7.63165 3
 3 9 4 83.0373 8.05933 2
 3 9 4 81.9638 8.48095 1
 4 -9 4 42.8896 4.37047 1
 -4 -9 -4 39.6813 8.16581 1
 4 -9 4 47.0132 6.68038 3
 4 9 4 50.0903 6.08216 2
 4 9 4 40.6306 6.22663 1
 5 -9 4 6.07354 3.43503 1
 -5 -9 -4 9.99779 7.91787 1
 5 -9 4 0.24899 6.87402 3
 5 9 4 -10.079 6.03025 1
 -6 -9 -4 43.529 7.55067 2
 -6 -9 -4 15.6339 10.9465 3
 6 -9 4 18.9329 8.99328 3
 -6 -9 -4 17.5164 9.64353 1
 6 -9 4 16.3945 5.25363 1
 6 9 4 28.0167 8.0042 1
 -6 -10 4 23.4758 9.1996 2
 -6 -10 4 22.0509 10.6386 3
 6 -10 -4 19.8949 8.38805 3
 6 10 -4 31.6223 12.4675 2
 6 10 -4 14.4658 9.14029 1
 5 -10 -4 63.0396 8.63133 3
 -5 -10 4 -98.506 113.884 4
 5 10 -4 41.6893 7.88438 1
 5 10 -4 55.7633 10.5191 2
 4 -10 -4 -0.7452 5.99702 3
 -4 -10 4 1.01657 7.52113 1
 4 -10 -4 4.92004 5.36418 1
 4 10 -4 -13.24 5.32072 1
 4 10 -4 -11.045 7.55853 2
 3 -10 -4 26.4845 6.12116 3
 -3 -10 4 19.1925 7.28433 1
 3 -10 -4 26.8739 5.80056 1
 3 10 -4 17.5528 5.50575 1
 3 10 -4 27.2172 7.7618 2
 2 -10 -4 60.6968 6.96159 3
 -2 -10 4 83.0289 7.82072 1
 2 -10 -4 90.397 9.22709 1
 2 10 -4 74.0901 7.79919 1
 2 10 -4 64.7722 7.85375 2
 -1 -10 4 10.1916 5.1429 1
 1 -10 -4 6.74047 5.25778 1
 1 10 -4 3.18034 5.86229 2
 -1 10 4 0.25879 5.26948 2
 0 -10 4 104.5 8.62043 1
 0 -10 -4 98.3649 10.1251 1
 0 10 -4 103.051 8.86805 2
 0 10 4 86.9805 9.06418 2
 1 -10 4 10.2726 5.4933 3
 -1 -10 -4 6.31202 6.15454 1
 1 -10 4 0.81456 4.38096 1
 -1 10 -4 5.79436 6.04539 2
 1 10 4 8.71157 5.08665 2
 -2 -10 -4 1.53163 6.72633 1
 2 -10 4 -5.1368 5.96324 3
 2 -10 4 8.2086 4.02476 1
 2 10 4 9.67124 5.34083 2
 -3 -10 -4 28.1188 8.16306 1
 3 -10 4 18.8028 7.06169 3
 3 10 4 19.8031 5.63734 1
 3 10 4 18.8119 6.03114 2
 4 -10 4 42.1895 7.96663 3
 -4 -10 -4 39.1535 9.36145 1
 4 10 4 38.7594 6.80513 2
 4 10 4 38.0174 6.71699 1
 -5 -10 -4 2.70381 9.6391 1
 5 -10 4 9.06805 8.53453 3
 5 10 4 13.5014 7.5421 1
 5 -11 -4 0.31602 7.45119 1
 5 -11 -4 7.70981 8.91631 3
 5 11 -4 5.98824 11.6804 2
 5 11 -4 -3.6597 8.48165 1
 4 -11 -4 63.3647 8.12916 1
 4 -11 -4 70.6022 9.02077 3
 -4 -11 4 60.7461 10.4444 1
 4 11 -4 52.8749 8.38008 1
 4 11 -4 50.2165 10.6255 2
 -3 -11 4 3.03847 8.04492 1
 3 -11 -4 18.7101 6.75146 1
 3 -11 -4 10.6653 6.66385 3
 3 11 -4 4.92065 8.68497 2
 3 11 -4 0.31645 5.56348 1
 2 -11 -4 63.8669 7.83147 1
 -2 -11 4 69.7564 8.78526 1
 2 -11 -4 71.2292 8.21049 3
 2 11 -4 58.5119 9.38085 2
 2 11 -4 75.7988 7.07357 1
 1 -11 -4 74.1557 7.74285 1
 -1 -11 4 81.8461 8.07536 1
 -1 11 4 77.3531 8.20447 2
 1 11 -4 78.8742 8.87716 2
 0 -11 -4 29.255 7.32304 1
 0 -11 4 35.6559 6.26483 1
 0 -11 4 29.4058 6.94704 3
 0 11 -4 25.6254 8.0089 2
 0 11 4 21.5748 6.70965 2
 -1 -11 -4 111.272 9.82794 1
 1 -11 4 95.8025 9.03504 1
 1 -11 4 82.5001 8.33744 3
 1 11 4 75.9984 7.55359 2
 -1 11 -4 93.0121 10.1278 2
 2 -11 4 -1.0274 4.7018 1
 -2 -11 -4 -4.8858 8.0004 1
 2 -11 4 -5.7438 7.28726 3
 -2 11 -4 0.88523 8.13302 2
 2 11 4 7.68262 6.72411 2
 -3 -11 -4 90.7919 11.1667 1
 3 -11 4 81.9699 9.98971 3
 3 11 4 88.9732 8.38304 2
 3 11 4 91.0807 8.8994 1
 4 -11 4 14.4991 9.60293 3
 -4 -11 -4 30.6641 11.1462 1
 4 11 4 21.5169 8.40396 1
 4 11 4 40.0811 8.05615 2
 3 -12 -4 8.46901 8.50208 3
 3 -12 -4 14.9817 8.36191 1
 -3 -12 4 10.4692 10.0294 1
 3 12 -4 19.5373 10.9564 2
 3 12 -4 6.22199 7.58778 1
 2 -12 -4 45.9901 9.30756 3
 2 -12 -4 53.6217 8.93442 1
 -2 -12 4 52.1914 10.3435 1
 2 12 -4 53.5428 11.0172 2
 -2 12 4 57.5519 9.86487 2
 1 -12 -4 4.86857 8.2353 1
 -1 -12 4 9.611 8.24494 1
 -1 12 4 4.41762 8.14727 2
 1 12 -4 11.7122 9.14857 2
 0 -12 -4 19.8738 9.03084 1
 0 -12 4 8.95348 6.97377 1
 0 -12 4 5.95962 7.86546 3
 0 12 4 9.41423 7.88459 2
 0 12 -4 13.9413 9.72341 2
 1 -12 4 -6.1753 8.02974 3
 1 -12 4 11.3378 6.1998 1
 -1 -12 -4 12.7225 9.18536 1
 1 12 4 8.55435 7.55361 2
 -1 12 -4 7.53522 9.86634 2
 2 -12 4 8.53926 5.2898 1
 2 -12 4 -14.429 8.66999 3
 -2 -12 -4 8.56325 10.437 1
 2 12 4 -2.4504 8.14862 2
 -2 12 -4 18.9263 9.94478 2
 3 -12 4 1.07799 10.2926 3
 -3 -12 -4 -10.333 11.1784 1
 3 12 4 -4.2719 8.51114 2
 -3 12 -4 -5.8555 11.1547 2
 9 0 -5 5.19313 8.13737 3
 -9 0 5 7.84812 9.97764 3
 9 0 -5 -0.7685 7.46325 1
 -9 0 5 -1.2025 8.22187 2
 -8 0 5 -9.3267 5.65656 2
 8 0 -5 -6.9728 5.15786 1
 8 0 -5 3.24191 5.80449 3
 -8 0 5 -1.2488 7.09317 3
 -7 0 5 -7.8031 5.22668 3
 -7 0 5 -8.9219 4.20276 2
 7 0 -5 0.22684 4.14195 3
 7 0 -5 -1.4423 3.66552 1
 6 0 -5 -4.74 2.84991 1
 -6 0 5 -1.0513 4.1594 3
 -6 0 5 -3.4216 3.55418 2
 6 0 -5 0.755 3.04374 3
 -5 0 5 1.23436 2.85888 2
 5 0 -5 1.23367 2.64067 1
 5 0 -5 2.77408 2.41073 3
 -5 0 5 1.33883 3.3005 3
 4 0 -5 1.44337 2.04191 3
 -4 0 5 1.38903 2.60919 3
 -4 0 5 1.52497 2.46386 2
 -3 0 5 0.43458 1.93928 2
 -3 0 5 1.01363 2.05321 3
 3 0 -5 1.69598 1.78049 3
 -2 0 5 -1.4963 1.6744 2
 -2 0 5 -1.3308 1.45242 3
 2 0 -5 -5.8262 1.28536 3
 2 0 -5 -2.3249 1.96106 2
 1 0 -5 -0.899 1.39719 2
 1 0 -5 1.10987 0.89919 3
 -1 0 5 -2.0377 1.54381 2
 0 0 -5 2.17174 1.18386 2
 0 0 5 0.06524 1.18765 2
 -1 0 -5 -0.2078 1.38562 1
 1 0 5 -0.6751 1.33051 1
 -1 0 -5 -1.6591 1.35455 3
 -2 0 -5 0.12183 1.78976 3
 2 0 5 -1.0071 1.64587 3
 -2 0 -5 1.94306 1.85339 1
 2 0 5 -0.4752 1.5779 1
 3 0 5 -0.1829 1.94235 3
 -3 0 -5 0.48228 2.09821 1
 -3 0 -5 1.96345 2.41882 3
 3 0 5 1.0974 2.04662 1
 -4 0 -5 -2.4257 2.73475 1
 -4 0 -5 -1.0009 3.09328 3
 4 0 5 0.44771 2.39312 1
 4 0 5 -2.3683 2.02363 3
 -5 0 -5 -2.6551 3.42808 1
 5 0 5 4.13071 2.89175 3
 -5 0 -5 1.15275 4.19394 3
 5 0 5 1.72801 3.2749 1
 6 0 5 3.15452 3.26239 3
 -6 0 -5 -6.9262 4.98302 3
 6 0 5 -2.2241 4.30324 1
 7 0 5 2.17876 5.79503 1
 7 0 5 4.50455 4.06599 3
 -7 0 -5 11.9107 6.72433 3
 -8 0 -5 -7.3455 6.7921 2
 -8 0 -5 1.64462 7.94973 3
 8 0 5 -3.9646 7.11934 1
 -9 0 -5 0.66194 9.17295 2
 9 0 5 11.9352 10.1023 1
 -9 0 -5 6.64491 10.7484 3
 -9 -1 5 -0.2966 9.84812 3
 9 -1 -5 -18.196 7.52664 1
 -9 -1 5 -7.3398 8.60965 2
 9 -1 -5 0.99494 7.79355 3
 -9 1 5 -14.236 7.78398 2
 -9 1 5 5.79233 10.0713 3
 9 1 -5 -5.4068 7.13609 1
 -8 -1 5 113.904 9.60576 3
 8 -1 -5 95.8006 8.7941 1
 -8 -1 5 123.699 11.9301 2
 8 -1 -5 103.49 8.65223 3
 -8 1 5 94.9349 8.53917 2
 8 1 -5 102.199 9.78313 1
 -8 1 5 124.024 10.1393 3
 8 1 -5 103.569 9.82813 3
 -7 -1 5 4.51987 4.73287 2
 7 -1 -5 9.16662 4.49902 3
 -7 -1 5 -1.536 5.46147 3
 7 -1 -5 -3.4779 4.24722 1
 7 1 -5 7.03389 4.04537 1
 7 1 -5 8.95609 4.48073 3
 -7 1 5 12.1665 5.8412 3
 -7 1 5 2.45875 4.73345 2
 6 -1 -5 180.247 8.56812 1
 -6 -1 5 167.921 8.68661 3
 6 -1 -5 172.571 7.63561 3
 -6 -1 5 182.695 8.81909 2
 6 1 -5 171.79 8.30673 1
 6 1 -5 185.913 7.57137 3
 -6 1 5 189.67 8.83648 3
 -6 1 5 170.766 8.54573 2
 -5 -1 5 11.9659 3.62422 3
 5 -1 -5 9.69182 2.8902 3
 -5 -1 5 8.87335 3.27438 2
 5 1 -5 6.94307 3.05403 1
 5 1 -5 11.5257 2.83305 3
 -5 1 5 10.0147 3.24681 2
 -5 1 5 9.45163 3.70518 3
 -4 -1 5 132.018 5.99754 2
 4 -1 -5 137.516 5.2096 3
 -4 -1 5 131.638 5.47292 3
 4 1 -5 126.266 4.75434 3
 4 1 -5 129.29 6.04509 1
 -4 1 5 135.12 5.7168 3
 -4 1 5 118.033 5.87337 2
 -3 -1 5 273.825 6.44592 3
 3 -1 -5 268.891 6.61696 3
 -3 -1 5 277.405 7.76932 2
 3 1 -5 273.781 6.21356 3
 3 1 -5 260.692 7.79766 2
 -3 1 5 280.285 6.95978 3
 -3 1 5 268.27 7.70357 2
 -1 -1 5 57.2756 3.30073 2
 1 1 -5 60.7379 3.47266 2
 -1 1 5 57.7993 2.97775 2
 0 -1 -5 185.486 4.08224 2
 0 -1 5 192.687 3.69212 3
 0 -1 5 182.596 5.00353 2
 0 1 -5 184.225 3.67805 3
 0 1 -5 187.171 5.0112 2
 0 1 5 187.828 11.8402 4
 0 1 5 183.87 4.10708 2
 1 -1 5 588.411 10.5969 3
 -1 -1 -5 564.941 12.3418 1
 1 -1 5 566.156 11.5044 1
 -1 1 -5 575.532 11.5056 1
 1 1 5 567.405 12.364 1
 -2 -1 -5 321.453 8.39104 1
 2 -1 5 330.431 7.34306 3
 -2 -1 -5 328.777 7.54882 3
 2 -1 5 323.743 7.63607 1
 -2 1 -5 330.55 7.60592 1
 2 1 5 327.495 8.40931 1
 -3 -1 -5 0.1567 2.32017 1
 -3 -1 -5 0.88244 2.21471 3
 3 -1 5 0.07641 1.95814 1
 3 -1 5 2.67352 2.01145 3
 3 1 5 -1.3412 2.04941 1
 -3 1 -5 2.13573 2.70456 3
 -3 1 -5 0.65987 1.99764 1
 4 -1 5 388.886 10.422 1
 4 -1 5 381.016 9.68238 3
 -4 -1 -5 380.658 10.0166 3
 -4 -1 -5 385.036 10.9125 1
 4 1 5 392.387 10.862 1
 -4 1 -5 391.915 10.2683 3
 5 -1 5 43.0418 4.5534 1
 5 -1 5 43.0415 4.11882 3
 -5 -1 -5 44.579 4.82968 3
 -5 -1 -5 49.8587 5.33134 1
 5 1 5 43.3746 4.41919 1
 -5 1 -5 41.148 5.24414 3
 6 -1 5 111.253 8.06286 1
 6 -1 5 107.848 6.96562 3
 -6 -1 -5 99.4839 8.67629 3
 -6 1 -5 107.731 9.05105 3
 6 1 5 117.567 8.26344 1
 -7 -1 -5 254.548 11.8138 2
 7 -1 5 256.618 12.3374 1
 -7 -1 -5 259.15 12.5129 3
 7 -1 5 243.702 10.3143 3
 -7 1 -5 259.341 12.6168 3
 7 1 5 272.543 12.814 1
 8 -1 5 3.83909 7.45313 1
 8 -1 5 22.9741 6.12123 3
 -8 -1 -5 44.1725 9.24989 3
 -8 -1 -5 14.4697 7.18713 2
 8 1 5 16.7211 7.62035 1
 -8 1 -5 12.0327 8.86084 3
 9 -1 5 93.2477 12.4285 1
 -9 -1 -5 67.1943 11.3656 2
 -9 -1 -5 88.7058 13.2506 3
 9 -1 5 89.3275 9.21878 3
 -9 1 -5 82.1127 12.6254 3
 -9 1 -5 69.9177 11.227 2
 9 1 5 75.3932 12.1225 1
 9 -2 -5 5.03259 8.04818 3
 9 -2 -5 7.94795 8.23717 1
 -9 -2 5 15.1484 9.52709 2
 -9 -2 5 -4.8409 10.0293 3
 -9 2 5 -20.101 7.39244 2
 9 2 -5 -10.948 7.16719 1
 -9 2 5 -1.9144 10.8663 3
 -8 -2 5 11.904 7.78078 3
 8 -2 -5 2.71094 5.58862 1
 8 -2 -5 6.5933 5.76081 3
 -8 -2 5 0.91027 6.39334 2
 -8 2 5 6.9144 7.75804 3
 8 2 -5 -3.6397 4.72824 1
 -8 2 5 -11.784 5.38701 2
 -7 -2 5 16.0894 6.22885 3
 7 -2 -5 2.42532 4.32659 3
 7 -2 -5 10.9807 4.89438 1
 -7 -2 5 14.4946 5.33033 2
 -7 2 5 9.32832 6.12627 3
 -7 2 5 -1.1569 4.46907 2
 7 2 -5 12.9143 4.42917 1
 -6 -2 5 10.4822 4.71703 3
 -6 -2 5 9.25014 4.0864 2
 6 -2 -5 7.70431 3.65701 3
 -6 2 5 8.05882 4.61588 3
 6 2 -5 0.05774 3.18749 1
 -6 2 5 -0.4654 3.71132 2
 -5 -2 5 4.03416 2.91618 2
 -5 -2 5 -3.4246 3.42722 3
 5 -2 -5 2.33653 2.76788 3
 -5 2 5 3.26101 3.56291 3
 5 2 -5 -4.5951 2.36252 1
 -4 -2 5 45.4574 4.65057 2
 -4 -2 5 43.5914 3.51197 3
 4 -2 -5 41.2503 4.1603 3
 4 2 -5 47.1221 4.56045 1
 -4 2 5 40.8769 3.74098 3
 4 2 -5 50.9484 5.49319 2
 -3 -2 5 134.874 4.46351 3
 -3 -2 5 134.459 5.5112 2
 3 -2 -5 136.854 4.93125 3
 3 2 -5 133.662 5.78864 2
 3 2 -5 137.587 5.70296 1
 -3 2 5 133.926 5.26523 3
 2 -2 -5 172.216 4.9447 3
 -2 -2 5 173.244 4.03054 3
 -2 -2 5 165.463 5.40159 2
 2 2 -5 161.797 5.49935 1
 2 2 -5 152.253 5.57989 2
 -1 -2 5 3.64716 1.85602 2
 1 2 -5 4.44764 1.89113 2
 0 -2 5 297.6 5.61001 3
 0 2 5 258.143 16.306 4
 0 2 5 305.287 5.81435 2
 0 2 -5 291.228 7.28506 2
 -1 -2 -5 22.2578 2.3708 1
 1 -2 5 25.5948 2.63976 3
 -1 2 -5 26.477 2.70331 3
 1 2 5 26.3753 3.11003 1
 -2 -2 -5 320.573 8.77307 1
 2 -2 5 338.607 7.5736 3
 2 -2 5 313.418 7.21894 1
 -2 2 -5 321.564 7.61588 3
 2 2 5 337.89 8.84847 1
 -3 -2 -5 1.5768 2.51126 1
 3 -2 5 2.31191 2.01081 1
 3 -2 5 2.69366 2.03658 3
 -3 -2 -5 2.0196 2.57407 3
 3 2 5 2.31184 2.19741 1
 -3 2 -5 2.91056 2.73276 3
 4 -2 5 13.617 3.06762 1
 -4 -2 -5 20.2602 3.56712 3
 4 -2 5 12.9355 2.99708 3
 -4 -2 -5 10.944 2.87467 2
 -4 -2 -5 26.1967 3.85425 1
 -4 2 -5 20.2453 3.80157 3
 4 2 5 17.0977 3.20337 1
 -5 -2 -5 91.8372 6.89405 3
 5 -2 5 83.0837 5.73446 3
 5 -2 5 79.8889 6.17536 1
 -5 -2 -5 72.1446 5.99097 2
 -5 -2 -5 90.1183 7.22565 1
 5 2 5 88.4364 6.56732 1
 -5 2 -5 88.1907 7.08318 3
 -6 -2 -5 9.34506 5.0841 3
 -6 -2 -5 11.7151 4.82909 1
 6 -2 5 10.4894 4.59938 1
 -6 -2 -5 9.08049 4.25655 2
 6 -2 5 1.20377 3.46915 3
 6 2 5 8.63127 4.12369 1
 -6 2 -5 10.1142 5.51182 3
 -7 -2 -5 -1.4909 6.7279 3
 7 -2 5 2.03369 5.82385 1
 -7 -2 -5 4.69455 5.64396 2
 7 -2 5 8.77931 4.58217 3
 7 2 5 12.3639 5.42159 1
 -7 2 -5 11.4405 6.84618 3
 -8 -2 -5 -1.0841 7.32434 2
 -8 -2 -5 -7.9166 8.77302 3
 8 -2 5 -10.633 7.31935 1
 8 -2 5 -7.7236 4.91054 3
 8 2 5 2.50204 6.97462 1
 -8 2 -5 3.28375 8.09541 3
 9 -2 5 6.67147 10.6624 1
 9 -2 5 8.91944 7.7436 3
 -9 -2 -5 13.9848 12.4943 3
 -9 -2 -5 -1.8637 10.4987 2
 -9 2 -5 -1.3772 11.1158 3
 9 2 5 -3.5229 9.98049 1
 9 -3 -5 12.1344 8.25023 3
 9 -3 -5 2.55512 8.5138 1
 -9 -3 5 5.93926 10.4497 3
 -9 -3 5 13.0603 9.75843 2
 9 3 -5 6.95971 7.11478 1
 -9 3 5 -6.6989 11.3102 3
 -9 3 5 4.95608 7.51085 2
 -8 -3 5 112.886 10.1834 3
 8 -3 -5 95.1866 8.64174 3
 -8 -3 5 117.614 12.4249 2
 8 -3 -5 98.6557 9.22229 1
 8 3 -5 98.0854 8.17702 1
 -8 3 5 97.9505 10.2234 3
 -8 3 5 90.0694 9.16514 2
 -7 -3 5 13.7884 6.29575 3
 -7 -3 5 9.06916 5.24024 2
 7 -3 -5 10.0489 4.82476 3
 7 -3 -5 12.7742 5.33579 1
 -7 3 5 12.6877 6.33299 3
 7 3 -5 6.09597 4.38533 1
 6 -3 -5 40.6316 4.92639 3
 -6 -3 5 44.0276 5.51986 3
 -6 -3 5 47.8283 5.54021 2
 6 3 -5 41.3393 4.65875 1
 -6 3 5 41.2972 5.745 3
 5 -3 -5 483.071 11.9877 3
 -5 -3 5 498.437 11.7796 3
 -5 -3 5 481.771 13.145 2
 5 3 -5 480.279 13.5686 1
 -5 3 5 469.37 12.5701 3
 -3 -3 5 701.638 15.4798 2
 -3 -3 5 709.39 13.2785 3
 3 -3 -5 699.534 14.1995 3
 3 3 -5 679.649 15.5619 2
 3 3 -5 704.05 16.0683 1
 2 -3 -5 29.6327 2.61597 3
 -2 -3 5 32.4095 3.53759 2
 2 3 -5 31.1396 3.43847 1
 2 3 -5 33.8702 3.22129 2
 -1 -3 5 3.95875 1.81652 2
 1 3 -5 2.01249 2.04261 2
 1 3 -5 1.04345 1.53405 1
 0 -3 5 232.057 5.14864 3
 0 -3 -5 227.051 6.57983 1
 0 3 -5 232.664 6.65126 2
 0 3 -5 222.127 5.12718 1
 1 -3 5 4.99674 1.73846 3
 -1 -3 -5 -0.201 8.50231 4
 -1 -3 -5 1.88884 1.88873 1
 -1 3 -5 -3.1741 9.65908 4
 -1 3 -5 2.46284 1.8809 3
 1 3 5 1.21845 1.71318 1
 -2 -3 -5 194.448 6.79808 1
 -2 -3 -5 187.256 4.56309 2
 2 -3 5 188.332 5.72033 3
 2 -3 5 200.474 4.56163 1
 2 3 5 207.447 6.85368 1
 -2 3 -5 197.165 6.00165 3
 -3 -3 -5 430.761 9.69464 2
 3 -3 5 432.704 9.80959 1
 -3 -3 -5 436.09 11.868 1
 3 -3 5 454.28 10.2925 3
 -3 3 -5 447.338 10.5447 3
 3 3 5 443.928 11.7582 1
 4 -3 5 2103.01 40.4233 1
 4 -3 5 2064.18 37.0764 3
 -4 -3 -5 1992.94 42.0633 1
 -4 -3 -5 2136 39.2674 2
 -4 -3 -5 2013.49 37.0848 3
 -4 3 -5 1982.74 37.0257 3
 4 3 5 2063.54 42.2686 1
 5 -3 5 435.305 11.5509 3
 -5 -3 -5 424.053 13.2258 1
 5 -3 5 440.992 11.8371 1
 -5 -3 -5 430.899 11.6936 2
 -5 -3 -5 416.482 12.104 3
 -5 3 -5 416.601 12.1429 3
 5 3 5 422.688 12.7196 1
 -6 -3 -5 48.9177 6.39925 1
 -6 -3 -5 57.4331 5.647 2
 6 -3 5 38.226 4.98076 3
 6 -3 5 55.5425 5.65598 1
 -6 -3 -5 57.9584 6.29281 3
 6 3 5 48.1595 5.63366 1
 -6 3 -5 46.9625 6.56149 3
 7 -3 5 111.441 10.2167 1
 -7 -3 -5 126.155 11.9292 3
 -7 -3 -5 97.5604 8.63038 1
 -7 -3 -5 125.836 10.4825 2
 7 -3 5 105.38 8.66366 3
 -7 3 -5 105.451 9.05526 3
 7 3 5 124.925 9.94446 1
 -8 -3 -5 13.5536 7.63374 2
 8 -3 5 -1.5104 5.77382 3
 -8 -3 -5 10.1904 9.44002 3
 8 -3 5 -9.4368 7.27296 1
 8 3 5 -4.1503 6.44083 1
 -8 3 -5 6.40961 9.14423 3
 9 -3 5 28.1025 11.288 1
 -9 -3 -5 27.2865 13.8912 3
 -9 -3 -5 31.5303 11.2867 2
 9 -3 5 23.1589 7.96921 3
 -9 3 -5 45.1109 13.2453 3
 9 3 5 15.565 10.3497 1
 -9 -4 5 22.4824 11.7173 3
 9 -4 -5 16.2776 9.47263 1
 9 -4 -5 38.2034 9.68798 3
 -9 -4 5 26.7628 10.9108 2
 -9 4 5 6.80344 8.27981 2
 9 4 -5 23.3071 7.68126 1
 -9 4 5 20.8152 12.4582 3
 -8 -4 5 23.2677 8.73403 3
 -8 -4 5 12.4167 7.60731 2
 8 -4 -5 13.0815 6.71106 3
 8 -4 -5 14.2016 7.1427 1
 -8 4 5 20.208 9.30964 3
 8 4 -5 8.7817 5.96528 1
 -7 -4 5 3.48476 6.25085 3
 -7 -4 5 2.24997 5.50649 2
 7 -4 -5 1.75873 4.98307 3
 -7 4 5 -1.3405 6.31031 3
 7 4 -5 -1.075 4.35653 1
 -6 -4 5 84.2475 8.12133 3
 6 -4 -5 86.8118 7.12522 3
 -6 -4 5 69.8946 7.65626 2
 -6 4 5 91.1802 7.44254 3
 6 4 -5 67.7184 7.40533 1
 5 -4 -5 7.65345 3.57792 3
 -5 -4 5 3.3024 3.54379 3
 -5 -4 5 0.10285 3.43522 2
 5 4 -5 7.88456 4.42797 2
 5 4 -5 -4.0273 2.85576 1
 4 -4 -5 54.7973 5.02476 3
 -4 -4 5 61.4477 4.85691 3
 -4 -4 5 54.3609 5.07664 2
 4 4 -5 61.5593 5.16106 1
 4 4 -5 67.0599 6.10715 2
 -2 -4 5 283.311 8.03028 2
 2 4 -5 282.194 8.31354 2
 2 4 -5 284.648 8.00545 1
 1 -4 -5 28.4009 13.5735 4
 -1 -4 5 18.9745 2.5049 2
 1 4 -5 19.9012 2.31486 1
 1 4 -5 18.3592 2.66734 2
 -1 4 5 27.3684 14.0926 4
 0 -4 -5 730.29 16.1406 1
 0 -4 5 724.775 13.6624 3
 0 4 -5 732.413 15.8752 2
 0 4 -5 743.398 14.6123 1
 1 -4 5 176.95 5.24703 3
 -1 -4 -5 168.745 6.22968 1
 1 4 5 172.982 4.10648 2
 1 4 5 166.886 6.01147 1
 2 -4 5 35.5816 3.20129 3
 -2 -4 -5 34.5758 2.27361 2
 -2 -4 -5 26.1046 3.29152 1
 -2 4 -5 28.8298 14.9114 4
 -2 4 -5 31.5069 3.16802 3
 2 4 5 23.803 2.97324 1
 3 -4 5 1041.77 20.3435 3
 -3 -4 -5 1058.17 23.4662 1
 3 -4 5 1045.07 20.7799 1
 -3 -4 -5 1050.23 20.426 2
 -3 4 -5 1050.48 20.4809 3
 3 4 5 1061.07 23.4529 1
 -4 -4 -5 9.72035 2.65344 2
 4 -4 5 9.63121 2.51754 1
 -4 -4 -5 16.4089 3.85427 3
 4 -4 5 5.5477 3.15985 3
 -4 -4 -5 11.0166 3.8621 1
 -4 4 -5 13.0398 4.13035 3
 4 4 5 12.6598 2.8744 1
 5 -4 5 40.2928 4.39795 1
 -5 -4 -5 39.9817 5.06573 3
 -5 -4 -5 39.3942 5.01529 1
 5 -4 5 48.2715 4.74211 3
 -5 -4 -5 45.6102 4.3258 2
 -5 4 -5 46.2291 5.79399 3
 5 4 5 34.0581 4.24257 1
 -6 -4 -5 -7.8947 5.28412 3
 -6 -4 -5 -0.7845 4.24707 2
 6 -4 5 -3.3606 4.03824 3
 -6 -4 -5 1.75838 5.0645 1
 6 -4 5 -4.0442 4.28136 1
 6 4 5 -2.302 3.78678 1
 -6 4 -5 -2.3214 5.47689 3
 -7 -4 -5 7.85507 5.89322 2
 -7 -4 -5 10.014 6.04621 1
 7 -4 5 3.46752 4.85347 3
 -7 -4 -5 6.18435 7.00881 3
 7 -4 5 4.3478 5.93922 1
 7 4 5 -0.2746 4.87392 1
 -7 4 -5 8.62967 7.10267 3
 8 -4 5 30.1174 8.69192 1
 -8 -4 -5 40.9767 8.628 2
 -8 -4 -5 33.3558 10.4317 3
 8 -4 5 40.4778 6.62727 3
 -8 4 -5 32.9197 10.1297 3
 8 4 5 33.7625 7.86725 1
 8 -5 -5 32.4492 8.20386 1
 8 -5 -5 27.1009 7.36809 3
 -8 -5 5 24.156 8.958 3
 -8 -5 5 40.1696 8.77349 2
 8 5 -5 36.0542 6.93921 1
 7 -5 -5 7.87913 5.43819 3
 -7 -5 5 1.08028 5.83459 2
 -7 -5 5 5.2526 6.61404 3
 7 5 -5 -1.6834 4.95175 1
 -6 -5 5 362.739 12.6851 2
 6 -5 -5 347.744 11.7704 3
 -6 -5 5 360.508 12.1156 3
 6 5 -5 361.49 12.9626 1
 5 -5 -5 38.6615 4.61631 3
 -5 -5 5 38.1222 4.68287 3
 -5 -5 5 31.2018 4.42542 2
 5 5 -5 32.7843 5.46768 2
 5 5 -5 37.9969 5.03494 1
 -3 -5 5 214.177 7.58826 2
 3 -5 -5 213.749 7.25759 3
 3 5 -5 221.998 8.18927 2
 3 5 -5 217.498 7.86599 1
 -2 -5 5 237.069 7.62036 2
 -2 -5 5 239.076 7.83927 1
 2 5 -5 247.054 7.58658 1
 2 5 -5 243.857 8.04408 2
 1 -5 -5 60.2954 4.12791 1
 -1 -5 5 60.9871 4.24948 1
 1 -5 -5 56.7477 16.533 4
 1 5 -5 54.3494 4.93495 2
 1 5 -5 58.8362 3.75498 1
 0 -5 -5 86.8319 4.78443 1
 0 -5 -5 59.8353 15.0516 4
 0 -5 5 78.7077 3.64562 1
 0 5 -5 91.7041 5.21812 2
 0 5 -5 78.4235 3.271 1
 1 -5 5 35.2566 3.10362 3
 -1 -5 -5 15.4556 11.6787 4
 -1 -5 -5 40.709 4.4831 1
 1 5 5 39.4473 3.96372 1
 1 5 5 41.4837 2.92509 2
 -2 -5 -5 105.62 6.0884 1
 2 -5 5 108.964 5.16175 3
 2 5 5 105.997 3.92104 2
 2 5 5 108.288 5.67382 1
 -3 -5 -5 276.476 9.71894 1
 3 -5 5 273.008 6.45812 1
 -3 -5 -5 269.591 6.95101 2
 3 -5 5 276.839 8.35861 3
 -3 5 -5 277.691 8.87733 3
 3 5 5 282.002 9.42772 1
 -4 -5 -5 237.607 9.65603 1
 -4 -5 -5 217.702 7.04582 2
 4 -5 5 234.503 8.46428 3
 4 -5 5 235.247 6.87374 1
 -4 5 -5 214.553 9.16944 3
 4 5 5 243.97 9.08909 1
 -5 -5 -5 101.784 8.65882 1
 -5 -5 -5 91.3661 6.14834 2
 5 -5 5 75.3654 5.96594 1
 -5 -5 -5 103.2 8.61069 3
 5 -5 5 95.0798 7.38672 3
 -5 5 -5 91.6411 7.29068 3
 5 5 5 87.3594 6.98791 1
 -6 -5 -5 45.0277 5.51041 2
 -6 -5 -5 43.2265 7.02783 3
 6 -5 5 45.3474 5.56639 3
 -6 -5 -5 57.0906 7.25254 1
 6 -5 5 43.1169 5.34504 1
 -6 5 -5 42.8907 7.11497 3
 6 5 5 44.5623 5.24335 1
 7 -5 5 79.1089 7.84075 3
 7 -5 5 79.9976 7.74504 1
 -7 -5 -5 80.9511 7.66868 2
 -7 -5 -5 75.8902 9.14218 3
 -7 -5 -5 81.3853 8.83915 1
 -7 5 -5 84.2605 9.86218 3
 7 5 5 82.6794 8.78415 1
 -8 -5 -5 11.7657 10.867 3
 8 -5 5 14.7558 6.56373 3
 8 -5 5 -0.4034 8.32615 1
 -8 -5 -5 -11.297 8.0945 2
 -8 5 -5 -9.8449 10.0211 3
 8 5 5 6.2513 6.31506 1
 -8 -6 5 2.12112 8.47013 2
 -8 -6 5 -1.7275 9.76521 3
 8 -6 -5 4.45318 8.32529 1
 8 -6 -5 5.49271 8.15451 3
 8 6 -5 -7.0356 6.6344 1
 -7 -6 5 41.8167 7.39335 2
 -7 -6 5 42.1331 7.8547 3
 7 -6 -5 43.322 6.95299 3
 7 6 -5 38.3733 6.4692 1
 -6 -6 5 50.4378 6.46248 2
 6 -6 -5 46.2385 5.98858 3
 -6 -6 5 43.8395 5.95801 3
 6 6 -5 58.4668 8.16404 2
 6 6 -5 64.4807 6.84805 1
 -5 -6 5 96.2404 7.95755 3
 5 -6 -5 97.3997 7.70188 3
 -5 -6 5 24.6352 68.8921 4
 -5 -6 5 104.676 8.08055 2
 5 6 -5 111.262 9.60762 2
 5 6 -5 112.04 8.30428 1
 -4 -6 5 213.727 8.8744 2
 4 -6 -5 231.47 8.85196 3
 4 6 -5 227.929 9.3551 1
 4 6 -5 216.384 9.80489 2
 3 -6 -5 0.95501 2.97409 3
 -3 -6 5 10.4695 3.09174 2
 -3 -6 5 4.66499 3.55439 1
 3 6 -5 0.99672 2.89652 1
 3 6 -5 5.11181 3.87815 2
 -2 -6 5 345.483 10.2727 1
 -2 -6 5 334.994 9.92973 2
 2 6 -5 369.293 10.0423 1
 2 6 -5 352.882 10.5761 2
 1 -6 -5 8.86646 2.46998 1
 -1 -6 5 10.6982 2.79872 1
 1 6 -5 7.14713 3.09906 2
 1 6 -5 11.6352 2.4499 1
 0 -6 5 234.746 6.63853 1
 0 -6 -5 245.38 8.11962 1
 0 6 -5 254.534 8.65888 2
 0 6 -5 236.679 6.42477 1
 1 -6 5 190.341 6.46085 3
 -1 -6 -5 189.667 7.47605 1
 1 -6 5 182.055 4.90827 1
 1 6 5 182.36 5.63091 2
 1 6 5 188.782 7.12542 1
 -2 -6 -5 36.8765 4.2007 1
 2 -6 5 43.0032 4.19333 3
 2 6 5 34.4691 3.67296 2
 2 6 5 42.2712 4.57721 1
 3 -6 5 32.9596 4.21383 3
 -3 -6 -5 41.2728 4.84347 1
 -3 -6 -5 37.6931 3.81931 2
 3 6 5 40.2707 4.58 1
 4 -6 5 29.1686 2.94681 1
 4 -6 5 32.0835 4.73511 3
 -4 -6 -5 30.2541 5.11543 1
 -4 -6 -5 28.8849 3.3932 2
 -4 6 -5 29.4192 5.36184 3
 4 6 5 26.9641 4.5425 1
 5 -6 5 25.016 3.71122 1
 -5 -6 -5 27.492 6.11151 3
 -5 -6 -5 27.0475 4.07959 2
 5 -6 5 34.831 5.12281 3
 -5 -6 -5 25.0495 5.48925 1
 -5 6 -5 24.7135 6.03241 3
 5 6 5 18.7689 3.82694 1
 -6 -6 -5 11.1917 6.96503 3
 -6 -6 -5 12.7678 4.92671 2
 6 -6 5 10.1081 4.69491 1
 6 -6 5 12.8184 4.97929 3
 -6 -6 -5 17.0284 6.71922 1
 6 6 5 10.5395 4.58813 1
 -6 6 -5 22.2281 6.89872 3
 -7 -6 -5 -3.4973 6.12567 2
 -7 -6 -5 -1.3198 7.07003 1
 7 -6 5 -1.4466 6.17672 1
 -7 -6 -5 0.44105 8.62782 3
 7 -6 5 -3.3794 5.81758 3
 -7 6 -5 14.9781 9.30599 3
 7 6 5 -13.386 4.96544 1
 -8 -6 -5 42.7673 12.8231 3
 8 -6 5 37.7694 9.12268 1
 8 -6 5 23.0014 7.86466 3
 -8 -6 -5 40.9133 8.90975 2
 -8 -6 -5 20.4234 9.52512 1
 -8 6 -5 52.0394 12.0869 3
 8 6 5 18.6134 7.27685 1
 -8 -7 5 16.0402 9.87165 2
 -8 -7 5 14.9134 10.8712 3
 8 -7 -5 13.2443 8.96895 3
 8 -7 -5 19.7389 9.91386 1
 8 7 -5 30.6951 8.35591 1
 -7 -7 5 30.1845 8.4478 3
 7 -7 -5 27.896 7.20771 3
 -7 -7 5 24.5078 7.93191 2
 7 7 -5 38.3269 7.9059 1
 -6 -7 5 121.305 10.8393 2
 6 -7 -5 111.527 9.62299 3
 -6 -7 5 119.63 10.838 3
 6 7 -5 132.054 11.4013 1
 6 7 -5 137.251 13.7384 2
 -5 -7 5 20.087 5.25139 2
 -5 -7 5 5.90266 5.03672 3
 5 -7 -5 19.7176 4.95836 3
 5 7 -5 13.9833 6.08034 2
 5 7 -5 19.1166 5.32293 1
 -4 -7 5 72.7951 7.22382 2
 4 -7 -5 80.3553 6.2428 3
 4 7 -5 75.6701 6.67326 2
 4 7 -5 73.5079 7.71382 1
 -3 -7 5 93.3153 6.85041 2
 -3 -7 5 96.4598 7.92774 1
 3 -7 -5 99.0472 6.74904 3
 3 7 -5 92.3351 8.23161 2
 3 7 -5 87.435 7.16457 1
 2 -7 -5 31.8716 3.83476 1
 -2 -7 5 32.0098 4.49784 1
 2 7 -5 40.993 4.95546 2
 2 7 -5 35.7248 3.94096 1
 -1 -7 5 333.193 9.68477 1
 1 -7 -5 339.682 10.0975 1
 1 7 -5 330.519 9.23715 1
 1 7 -5 330.492 10.8224 2
 0 -7 5 141.303 5.73592 1
 0 -7 -5 154.515 7.19646 1
 0 7 -5 140.26 5.04903 1
 0 7 5 146.492 6.16994 2
 0 7 -5 156.039 7.99353 2
 -1 -7 -5 9.13639 3.55578 1
 -1 -7 -5 0.52879 16.6453 4
 1 -7 5 12.0292 3.37619 3
 1 -7 5 11.9677 2.33823 1
 1 7 5 10.8504 2.76779 2
 -2 -7 -5 312.582 10.9216 1
 2 -7 5 306.338 9.63468 3
 2 7 5 326.553 10.5243 1
 2 7 5 311.182 8.46907 2
 -3 -7 -5 8.09897 4.37363 1
 3 -7 5 8.26513 4.08993 3
 3 7 5 5.77616 3.1919 1
 3 7 5 9.01303 3.27005 2
 4 -7 5 55.3316 5.98994 3
 -4 -7 -5 50.6735 5.40961 2
 -4 -7 -5 43.1485 6.09826 1
 4 -7 5 46.726 3.91996 1
 4 7 5 55.9652 5.79206 1
 5 -7 5 83.0469 5.8909 1
 5 -7 5 95.5827 8.95472 3
 -5 -7 -5 98.2324 7.16128 2
 -5 -7 -5 95.4344 9.80103 1
 5 7 5 76.1408 7.91843 1
 6 -7 5 47.9214 5.46233 1
 6 -7 5 41.2818 6.98294 3
 6 -7 5 49.8323 5.4174 1
 -6 -7 -5 60.8248 8.27806 1
 -6 -7 -5 46.5242 5.98503 2
 -6 -7 -5 41.7814 8.19974 3
 6 7 5 31.1951 5.18156 1
 7 -7 5 29.5804 7.38803 3
 7 -7 5 29.2125 7.05351 1
 -7 -7 -5 41.9454 9.39382 1
 -7 -7 -5 34.5479 10.5574 3
 -7 -7 -5 27.6012 7.09859 2
 -7 7 -5 36.4944 10.5943 3
 7 7 5 32.8267 6.67911 1
 -7 -8 5 15.3496 9.19447 3
 -7 -8 5 8.49862 8.91802 2
 7 -8 -5 13.8747 7.26454 3
 7 8 -5 23.9423 8.84715 1
 -6 -8 5 11.6625 6.82927 2
 -6 -8 5 12.1278 7.22019 3
 6 -8 -5 13.5358 5.90998 3
 6 8 -5 13.9005 8.96516 2
 6 8 -5 -4.3312 6.19348 1
 -5 -8 5 67.4929 7.20066 3
 5 -8 -5 62.0098 6.8768 3
 -5 -8 5 67.8932 7.16734 2
 5 8 -5 68.1485 8.39873 2
 5 8 -5 66.895 7.47514 1
 -4 -8 5 96.8641 8.82032 2
 4 -8 -5 91.4089 8.56597 3
 -4 -8 5 92.3242 9.91324 1
 4 8 -5 111.494 8.41365 2
 4 8 -5 98.5941 8.9048 1
 3 -8 -5 11.9804 4.19385 3
 -3 -8 5 8.20361 4.6504 1
 3 8 -5 8.22223 5.42494 2
 3 8 -5 3.77884 3.78029 1
 -2 -8 5 167.428 8.98258 1
 2 -8 -5 158.321 7.85066 1
 2 8 -5 149.536 7.54428 1
 2 8 -5 154.768 9.49963 2
 -1 -8 5 11.8546 3.74222 1
 1 -8 -5 11.7412 3.81096 1
 1 8 -5 6.17748 2.74258 1
 1 8 -5 10.1823 4.47799 2
 0 -8 -5 117.869 25.5344 4
 0 -8 5 115.428 6.11584 1
 0 -8 -5 120.108 7.67415 1
 0 8 5 103.865 6.41656 2
 0 8 -5 112.485 8.42233 2
 1 -8 5 128.215 7.43769 3
 -1 -8 -5 125.494 8.30691 1
 1 -8 5 132.287 5.61193 1
 -1 -8 -5 127.3 27.255 4
 1 8 5 131.443 6.50242 2
 -1 8 -5 128.089 8.46949 2
 2 -8 5 51.3608 5.45534 3
 -2 -8 -5 50.2414 6.06947 1
 -2 -8 -5 60.9788 24.5863 4
 2 8 5 55.7288 5.94879 2
 2 8 5 55.1925 5.28589 1
 3 -8 5 91.0624 8.15959 3
 -3 -8 -5 96.7196 9.31823 1
 3 8 5 90.308 7.75018 1
 3 8 5 89.1936 6.55645 2
 -4 -8 -5 8.82327 6.26159 1
 4 -8 5 12.4831 5.33911 3
 4 8 5 7.91378 4.30667 1
 -5 -8 -5 81.6566 8.12345 2
 5 -8 5 84.7826 8.19387 3
 5 -8 5 60.6892 5.48217 1
 -5 -8 -5 108.884 11.3859 1
 5 8 5 91.1222 9.32949 1
 6 -8 5 39.9396 7.94772 3
 6 -8 5 37.8 5.39355 1
 -6 -8 -5 36.161 10.0699 3
 -6 -8 -5 42.077 6.40334 2
 -6 -8 -5 47.4097 8.90412 1
 6 8 5 26.8123 6.59777 1
 -7 -8 -5 -1.1431 8.30865 1
 7 -8 5 -3.433 6.85426 1
 -7 -8 -5 2.92451 7.60142 2
 -7 -8 -5 7.55413 12.0294 3
 7 -8 5 7.91463 8.02556 3
 7 8 5 -0.4624 6.97433 1
 6 -9 -5 21.2395 7.05842 3
 -6 -9 5 6.32269 8.65009 3
 -6 -9 5 14.494 8.06224 2
 6 9 -5 18.4634 10.8811 2
 6 9 -5 15.1184 7.61598 1
 -5 -9 5 53.2341 7.87154 3
 -5 -9 5 42.8914 7.45296 2
 5 -9 -5 47.2622 7.26643 3
 5 9 -5 48.6034 7.47008 1
 5 9 -5 44.3177 8.95036 2
 4 -9 -5 2.70857 4.94268 3
 -4 -9 5 0.05877 6.40663 1
 -4 -9 5 1.43333 5.36056 2
 4 9 -5 2.60685 4.88304 1
 4 9 -5 1.75976 6.75357 2
 3 -9 -5 142.77 8.49007 1
 3 -9 -5 131.544 8.84328 3
 -3 -9 5 129.369 10.7886 1
 3 9 -5 126.786 8.73323 1
 3 9 -5 130.706 11.5136 2
 -2 -9 5 7.08002 5.2366 1
 2 -9 -5 6.3106 4.25094 1
 2 9 -5 3.65128 3.77198 1
 2 9 -5 3.83381 5.4925 2
 -1 -9 5 115.935 8.15343 1
 1 -9 -5 107.943 8.38586 1
 1 9 -5 110.172 6.46969 1
 1 9 -5 116.093 9.54586 2
 0 -9 -5 191.454 30.691 4
 0 -9 -5 233.071 10.5852 1
 0 -9 5 242.857 8.71332 1
 0 9 5 241.413 9.46383 2
 0 9 -5 235.708 11.4799 2
 1 -9 5 4.84579 3.19531 1
 -1 -9 -5 34.551 26.9214 4
 1 -9 5 -1.4325 4.37432 3
 -1 -9 -5 -1.7973 4.68733 1
 1 9 5 3.23388 3.97145 2
 -1 9 -5 -0.3722 5.07928 2
 2 -9 5 21.1145 5.48192 3
 -2 -9 -5 24.8688 6.23377 1
 2 9 5 24.0313 4.6983 2
 2 9 5 22.1004 4.75637 1
 3 -9 5 65.141 6.88572 3
 -3 -9 -5 60.4079 7.83707 1
 3 9 5 55.1955 6.15351 1
 3 9 5 66.2015 7.46516 2
 -4 -9 -5 17.2678 7.5777 1
 4 -9 5 20.5991 6.72929 3
 4 9 5 30.0804 5.69053 1
 5 -9 5 41.3974 8.26442 3
 -5 -9 -5 37.2668 8.56905 1
 5 9 5 39.9628 7.36595 1
 -6 -9 -5 22.0376 9.86141 1
 -6 -9 -5 23.4493 11.0824 3
 6 -9 5 31.9754 9.0409 3
 -6 -9 -5 25.6441 7.24712 2
 6 9 5 7.37516 7.52478 1
 -6 -10 5 31.0908 10.7395 3
 6 -10 -5 33.619 8.63728 3
 -6 -10 5 45.4288 10.1767 2
 6 10 -5 36.5008 13.4837 2
 6 10 -5 27.8168 9.00593 1
 5 -10 -5 67.275 8.34247 3
 5 -10 -5 65.5425 8.00001 1
 -5 -10 5 47.103 120.16 4
 5 10 -5 61.66 8.71936 1
 5 10 -5 72.3051 10.5799 2
 4 -10 -5 102.964 9.80566 1
 4 -10 -5 77.4728 8.45485 3
 4 10 -5 85.1241 10.02 2
 4 10 -5 72.911 7.82467 1
 3 -10 -5 0.77706 5.20581 1
 3 -10 -5 3.83457 5.33238 3
 -3 -10 5 1.10842 6.38907 1
 3 10 -5 -7.854 4.70043 1
 3 10 -5 8.69256 7.78822 2
 2 -10 -5 181.901 10.6342 1
 -2 -10 5 181.997 11.9027 1
 2 -10 -5 188.728 10.1662 3
 2 10 -5 165.189 9.18299 1
 2 10 -5 192.142 13.1648 2
 1 -10 -5 69.8264 7.2 1
 -1 -10 5 80.4028 9.34542 1
 -1 10 5 66.7665 6.73551 2
 1 10 -5 80.092 8.10281 2
 0 -10 5 -2.6725 5.01977 3
 0 -10 5 -2.2206 4.53652 1
 0 -10 -5 2.69963 5.18731 1
 0 10 -5 5.41083 6.57016 2
 0 10 5 4.09089 4.87983 2
 1 -10 5 78.5021 7.14808 3
 -1 -10 -5 87.3002 8.19788 1
 1 -10 5 92.8684 6.96659 1
 1 10 5 77.8976 8.42131 2
 -1 10 -5 105.218 11.3346 2
 2 -10 5 11.9481 6.36003 3
 -2 -10 -5 19.8568 7.4622 1
 -2 10 -5 10.6014 7.14689 2
 2 10 5 14.7266 5.48664 2
 -3 -10 -5 159.378 14.0097 1
 3 -10 5 159.024 12.3384 3
 3 10 5 182.363 11.483 1
 3 10 5 158.16 9.50947 2
 4 -10 5 30.3156 7.99128 3
 -4 -10 -5 -3.2886 8.72326 1
 4 10 5 14.603 6.57551 1
 -5 -10 -5 42.9587 10.7043 1
 5 -10 5 42.1323 9.6595 3
 5 10 5 54.224 8.74063 1
 5 -11 -5 12.878 7.8076 1
 5 11 -5 -8.9929 8.49706 1
 5 11 -5 0.97371 11.6536 2
 4 -11 -5 7.99302 6.98754 1
 4 -11 -5 -0.2736 7.08683 3
 4 11 -5 -7.0776 9.69952 2
 4 11 -5 6.57384 7.20208 1
 3 -11 -5 8.51439 6.71349 1
 3 -11 -5 1.35875 6.47441 3
 -3 -11 5 3.17253 7.82739 1
 3 11 -5 -7.0432 5.58461 1
 3 11 -5 3.4158 9.0869 2
 2 -11 -5 19.7525 6.83944 1
 2 -11 -5 24.4417 6.777 3
 -2 -11 5 22.8738 7.25357 1
 2 11 -5 25.6812 8.50926 2
 2 11 -5 20.4344 5.51615 1
 -1 -11 5 49.171 7.2722 1
 1 -11 -5 50.582 7.53765 1
 1 11 -5 44.6377 8.49721 2
 -1 11 5 46.6325 7.26591 2
 0 -11 5 28.6335 6.93789 3
 0 -11 5 23.7637 6.15656 1
 0 -11 -5 17.5615 7.21645 1
 0 11 5 23.1731 6.63475 2
 0 11 -5 14.8374 8.05209 2
 -1 -11 -5 27.8299 8.17338 1
 1 -11 5 31.7001 6.9669 3
 1 -11 5 26.4674 5.3148 1
 -1 11 -5 23.9869 8.52823 2
 1 11 5 32.6245 6.47938 2
 2 -11 5 32.8522 8.00565 3
 -2 -11 -5 23.6248 8.7095 1
 -2 11 -5 21.2739 8.74953 2
 2 11 5 25.4367 6.73969 2
 3 -11 5 28.2524 8.85962 3
 -3 -11 -5 34.0365 10.223 1
 3 11 5 18.9228 6.84753 2
 3 11 5 22.1294 7.14902 1
 4 -11 5 -1.1952 8.77733 3
 -4 -11 -5 13.726 11.2878 1
 4 11 5 -7.8279 7.21622 1
 3 -12 -5 2.50186 8.41199 1
 -3 -12 5 -3.9235 10.086 1
 3 -12 -5 -5.7261 7.72652 3
 3 12 -5 -8.0291 6.50243 1
 3 12 -5 1.09207 11.3039 2
 2 -12 -5 54.2251 9.29239 1
 2 -12 -5 65.3211 9.4145 3
 -2 -12 5 69.0202 9.96668 1
 2 12 -5 72.2933 11.4669 2
 -2 12 5 58.9295 10.1068 2
 -1 -12 5 26.548 8.03332 1
 1 -12 -5 21.9273 8.80451 1
 -1 12 5 22.2257 8.63405 2
 1 12 -5 29.1033 9.93038 2
 0 -12 -5 59.8944 9.7392 1
 0 -12 5 34.0917 8.68513 3
 0 -12 5 45.9299 7.6645 1
 0 12 5 49.2412 8.48742 2
 0 12 -5 48.3257 10.7563 2
 1 -12 5 70.2393 9.78087 3
 1 -12 5 76.7275 7.09017 1
 -1 -12 -5 76.7655 11.3285 1
 1 12 5 80.83 8.91669 2
 -1 12 -5 89.1782 11.7094 2
 -2 -12 -5 -0.1319 10.5427 1
 2 -12 5 -5.5486 9.13145 3
 2 12 5 10.7313 8.10388 2
 -2 12 -5 16.1862 10.3255 2
 3 -12 5 20.0025 10.9419 3
 -3 -12 -5 13.4083 12.2554 1
 3 12 5 25.6176 8.04516 2
 -3 12 -5 31.765 12.333 2
 9 0 -6 18.7609 8.55784 3
 -9 0 6 27.3828 9.2774 2
 -9 0 6 18.7695 10.0213 3
 9 0 -6 1.64772 7.4408 1
 -8 0 6 168.821 12.1393 2
 -8 0 6 161.189 13.0675 3
 8 0 -6 160.534 10.9334 3
 8 0 -6 157.651 10.7041 1
 7 0 -6 13.7178 4.68854 3
 -7 0 6 0.20249 4.44526 2
 -7 0 6 6.30813 5.53685 3
 7 0 -6 -0.1299 3.83708 1
 6 0 -6 308.82 10.6501 1
 6 0 -6 295.137 9.30379 3
 -6 0 6 303.599 10.8741 2
 -6 0 6 292.124 10.1585 3
 -5 0 6 134.174 6.52443 3
 5 0 -6 133.128 5.68687 3
 -5 0 6 126.184 6.8831 2
 4 0 -6 3.56833 2.07631 3
 -4 0 6 3.87994 2.5129 2
 -4 0 6 4.0019 2.70697 3
 -3 0 6 1294.31 22.5188 3
 3 0 -6 1262.82 22.3687 3
 -3 0 6 1258.03 25.4376 2
 -2 0 6 640.72 13.7278 2
 2 0 -6 653.665 11.7158 3
 -2 0 6 657.406 11.8244 3
 1 0 -6 256.06 6.32589 2
 -1 0 6 259.758 6.33917 2
 0 0 -6 2086.07 38.1771 2
 0 0 6 2058.73 38.1751 2
 -1 0 -6 101.64 3.78559 1
 -1 0 -6 108.581 3.48679 3
 1 0 6 110.967 3.90207 1
 -2 0 -6 386.733 8.46834 3
 -2 0 -6 391.704 9.24798 1
 2 0 6 385.443 9.24194 1
 2 0 6 382.972 8.36013 3
 3 0 6 197.336 6.04665 3
 -3 0 -6 204.75 6.64028 1
 3 0 6 200.965 6.51704 1
 -4 0 -6 320.603 9.43634 1
 4 0 6 302.692 8.46335 3
 4 0 6 312.515 9.29998 1
 5 0 6 337.825 10.6427 1
 -5 0 -6 326.289 10.8721 1
 5 0 6 326.456 9.69403 3
 -5 0 -6 340.232 10.5943 3
 6 0 6 190.658 9.80464 1
 6 0 6 177.415 8.21609 3
 -6 0 -6 183.363 10.0415 3
 7 0 6 108.282 8.10304 3
 7 0 6 103.375 10.2617 1
 -7 0 -6 146.398 11.4088 3
 -8 0 -6 5.66959 8.9078 3
 8 0 6 5.27969 7.33231 1
 -9 0 -6 119.955 13.6378 3
 -9 0 -6 93.0251 11.366 2
 9 0 6 97.3966 12.468 1
 9 -1 -6 -6.9156 7.71745 3
 -9 -1 6 2.76126 8.75693 2
 -9 -1 6 4.61613 9.78351 3
 9 -1 -6 -2.798 7.54188 1
 9 1 -6 6.21613 7.33048 1
 -9 1 6 -4.6479 7.52735 2
 -9 1 6 9.54465 10.4574 3
 8 -1 -6 -3.1511 5.28396 1
 -8 -1 6 7.0202 6.54942 2
 8 -1 -6 -4.0997 5.58189 3
 -8 -1 6 2.80649 7.60799 3
 -8 1 6 1.8743 7.35342 3
 8 1 -6 6.14207 5.86963 3
 8 1 -6 5.41959 5.15756 1
 -8 1 6 4.98179 5.7199 2
 -7 -1 6 25.3618 6.10477 3
 7 -1 -6 34.0545 5.07768 3
 7 -1 -6 22.7098 5.03249 1
 -7 -1 6 26.0084 5.12927 2
 7 1 -6 22.3633 4.54277 1
 -7 1 6 26.8148 6.28157 3
 7 1 -6 36.2909 5.23635 3
 -7 1 6 8.98784 4.66963 2
 6 -1 -6 4.77051 3.43366 3
 -6 -1 6 8.47334 4.48073 3
 -6 -1 6 7.61022 3.67313 2
 6 -1 -6 8.29561 3.55407 1
 -6 1 6 0.97135 3.7266 2
 -6 1 6 8.99938 4.47583 3
 6 1 -6 -0.6327 3.22952 3
 6 1 -6 2.33359 3.2448 1
 -5 -1 6 25.6888 3.89128 3
 5 -1 -6 20.4746 3.09244 3
 -5 -1 6 17.7683 3.48568 2
 -5 1 6 18.0446 3.77203 3
 5 1 -6 22.0653 3.20182 3
 -5 1 6 22.1614 3.66993 2
 5 1 -6 21.3666 3.48678 1
 -4 -1 6 62.0117 4.9034 2
 4 -1 -6 73.231 4.3509 3
 -4 -1 6 69.9903 4.50708 3
 -4 1 6 66.6219 4.85991 2
 -4 1 6 72.648 5.04309 3
 4 1 -6 65.8876 3.94794 3
 3 -1 -6 50.208 3.48188 3
 -3 -1 6 54.3043 3.37113 3
 -3 -1 6 59.3018 4.35587 2
 -3 1 6 50.5911 3.95918 3
 -3 1 6 48.4712 4.11976 2
 3 1 -6 59.8831 4.5332 2
 3 1 -6 57.8509 2.92855 3
 -2 -1 6 418.962 9.81475 2
 2 -1 -6 411.307 8.34975 3
 -2 -1 6 428.479 7.78805 3
 -2 1 6 414.213 9.61387 2
 2 1 -6 405.698 9.80265 2
 2 1 -6 421.65 7.69603 3
 -1 -1 6 22.223 2.23675 2
 1 -1 -6 24.7455 2.72559 2
 1 1 -6 28.4283 3.15592 2
 -1 1 6 22.292 2.08507 2
 0 -1 6 111.41 2.66416 3
 0 -1 -6 110.815 3.1045 2
 0 -1 6 113.493 3.98703 2
 0 1 6 112.249 3.16144 2
 0 1 -6 114.143 2.69461 3
 0 1 -6 107.98 4.08687 2
 -1 -1 -6 76.5706 3.75229 1
 1 -1 6 70.437 2.94419 3
 -1 1 -6 75.4584 2.8707 1
 1 1 6 67.2458 3.57223 1
 2 -1 6 14.1905 1.88644 1
 2 -1 6 12.9057 1.9982 3
 -2 -1 -6 14.1103 2.36019 1
 -2 -1 -6 18.2542 2.52512 3
 2 1 6 13.1411 2.31605 1
 -2 1 -6 17.504 1.93996 1
 -2 1 -6 11.5182 2.38332 3
 -3 -1 -6 151.109 5.74249 3
 -3 -1 -6 151.168 6.08464 1
 3 -1 6 146.168 5.31419 3
 3 -1 6 148.087 5.40472 1
 -3 1 -6 159.052 5.43215 1
 3 1 6 150.468 5.88426 1
 -3 1 -6 146.455 5.79162 3
 -4 -1 -6 418.414 10.5527 3
 4 -1 6 409.999 10.2688 3
 -4 -1 -6 415.129 11.4993 1
 4 -1 6 420.937 10.9272 1
 -4 1 -6 423.032 10.9691 1
 -4 1 -6 390.18 10.5413 3
 4 1 6 419.474 11.3826 1
 5 -1 6 16.643 3.54089 3
 5 -1 6 12.5579 3.69507 1
 -5 -1 -6 15.1321 4.24829 3
 -5 -1 -6 15.5469 4.29965 1
 5 1 6 9.71118 3.53272 1
 -5 1 -6 23.2342 4.65733 3
 6 -1 6 4.34722 3.75217 3
 -6 -1 -6 7.26837 4.72419 1
 6 -1 6 8.61559 4.676 1
 -6 -1 -6 1.36003 5.42609 3
 -6 1 -6 16.388 5.77524 3
 6 1 6 20.8045 4.78888 1
 7 -1 6 15.2178 6.18451 1
 -7 -1 -6 14.9234 7.09856 3
 7 -1 6 24.9607 5.23468 3
 -7 -1 -6 4.54415 5.42118 2
 -7 1 -6 14.4141 6.66282 3
 7 1 6 17.9538 5.85333 1
 8 -1 6 -9.8622 5.23999 3
 8 -1 6 6.9696 7.61796 1
 -8 -1 -6 -5.826 6.62859 2
 -8 -1 -6 20.4796 8.97351 3
 8 1 6 -0.6198 7.30075 1
 -8 1 -6 -1.567 7.78311 3
 -9 -1 -6 16.5618 12.5148 3
 -9 -1 -6 -13.826 9.96199 2
 9 -1 6 3.7313 7.2105 3
 9 -1 6 17.3366 10.7777 1
 -9 1 -6 6.07933 11.0002 3
 9 1 6 8.53272 10.2869 1
 -9 -2 6 17.3736 10.2204 3
 9 -2 -6 -1.4515 7.77456 1
 9 -2 -6 24.3255 8.4804 3
 -9 -2 6 27.9249 9.47925 2
 9 2 -6 -4.1253 7.17684 1
 -9 2 6 13.8436 11.0946 3
 -9 2 6 6.75604 7.55062 2
 -8 -2 6 98.176 9.02395 3
 8 -2 -6 102.197 8.94987 1
 -8 -2 6 104.72 9.45335 2
 8 -2 -6 107.609 10.2745 3
 8 2 -6 100.485 9.20513 1
 -8 2 6 83.3049 8.01828 2
 -8 2 6 93.4994 9.35195 3
 7 -2 -6 1.09133 4.43883 3
 -7 -2 6 3.1055 4.80255 2
 -7 -2 6 5.88433 5.92163 3
 7 -2 -6 2.93757 4.66537 1
 -7 2 6 2.7181 4.56069 2
 7 2 -6 4.60264 3.67107 1
 -7 2 6 8.38304 6.05806 3
 6 -2 -6 304.02 9.76211 3
 -6 -2 6 330.136 11.2306 2
 -6 -2 6 307.583 10.4628 3
 6 2 -6 304.484 10.8317 1
 -6 2 6 300.135 11.0836 3
 -6 2 6 294.597 11.2803 2
 -5 -2 6 57.596 5.803 3
 -5 -2 6 56.4018 5.67116 2
 5 -2 -6 59.6091 5.15058 3
 5 2 -6 53.0985 5.55558 1
 -5 2 6 61.6591 4.93291 3
 -5 2 6 50.2086 4.71174 2
 4 -2 -6 51.9912 4.41833 3
 -4 -2 6 56.997 4.32493 3
 -4 -2 6 55.9561 4.93071 2
 -4 2 6 59.1853 5.20568 3
 4 2 -6 57.1396 4.8623 1
 4 2 -6 58.9781 5.68699 2
 -3 -2 6 595.583 13.5885 2
 3 -2 -6 593.614 12.0773 3
 -3 -2 6 595.509 11.3126 3
 3 2 -6 582.676 13.9079 1
 3 2 -6 589.573 13.6456 2
 2 -2 -6 683.247 13.0097 3
 -2 -2 6 677.016 11.921 3
 -2 -2 6 677.302 14.5598 2
 2 2 -6 672.582 14.6238 2
 -1 -2 6 161.847 5.31178 2
 1 2 -6 170.723 5.43015 2
 -1 2 6 164.666 4.66014 2
 0 -2 6 55.3753 2.25091 3
 0 2 -6 62.3302 3.9104 2
 0 2 -6 64.4351 2.26894 3
 0 2 6 62.6281 2.14069 2
 -1 -2 -6 5.53822 2.16523 1
 -1 -2 -6 -2.06 6.04241 4
 1 -2 6 3.30785 1.63781 3
 -1 2 -6 3.89143 7.8047 4
 1 2 6 3.71143 1.70708 1
 -1 2 -6 5.7435 1.00329 1
 -1 2 -6 8.62675 1.74801 3
 2 -2 6 776.023 15.4314 1
 -2 -2 -6 750.572 16.8987 1
 2 -2 6 772.332 14.6524 3
 2 2 6 773.754 17.0027 1
 -2 2 -6 779.061 14.7195 3
 -2 2 -6 759.582 15.3145 1
 3 -2 6 0.44031 1.83323 1
 -3 -2 -6 -0.9303 2.54994 3
 -3 -2 -6 3.27628 2.64379 1
 3 -2 6 0.29688 1.95685 3
 -3 2 -6 -0.0159 2.79673 3
 3 2 6 -0.9538 2.17778 1
 4 -2 6 1040.2 22.227 1
 4 -2 6 1054.04 20.5954 3
 -4 -2 -6 1033.71 23.3975 1
 -4 -2 -6 1051.89 20.9471 3
 4 2 6 1071.54 23.4882 1
 -4 2 -6 1049.97 20.8409 3
 -5 -2 -6 64.0115 5.90161 2
 -5 -2 -6 66.96 6.75796 3
 5 -2 6 78.0907 5.77467 3
 -5 -2 -6 76.9072 6.9831 1
 5 -2 6 72.9011 6.05031 1
 -5 2 -6 68.2234 6.99446 3
 5 2 6 81.1647 6.14442 1
 6 -2 6 241.957 9.46557 3
 6 -2 6 248.777 10.5459 1
 -6 -2 -6 243.676 9.87732 2
 -6 -2 -6 255.216 10.9536 3
 -6 -2 -6 251.876 11.737 1
 6 2 6 265.422 10.8369 1
 -6 2 -6 221.819 10.6691 3
 -7 -2 -6 101.919 9.9821 2
 7 -2 6 106.028 10.6031 1
 -7 -2 -6 111.386 11.0408 3
 7 -2 6 105.761 8.53418 3
 7 2 6 111.041 10.4616 1
 -7 2 -6 113.519 11.1235 3
 8 -2 6 -10.685 7.29506 1
 -8 -2 -6 -4.7791 7.15646 2
 -8 -2 -6 -1.056 9.23126 3
 8 -2 6 0.87005 5.25361 3
 8 2 6 -4.9063 6.65571 1
 -8 2 -6 -10.056 8.63691 3
 -9 -2 -6 65.3657 13.9058 3
 9 -2 6 43.9505 11.4965 1
 9 -2 6 45.4114 8.95598 3
 -9 -2 -6 23.7233 11.1283 2
 9 2 6 53.1229 11.2222 1
 -9 2 -6 23.6161 12.4306 3
 9 -3 -6 15.2968 8.33375 3
 9 -3 -6 3.57519 8.83048 1
 -9 -3 6 11.5069 9.57428 2
 -9 -3 6 20.7898 10.8507 3
 9 3 -6 10.9183 7.52672 1
 -9 3 6 -15.682 7.49893 2
 -9 3 6 28.7987 11.5363 3
 -8 -3 6 7.02484 8.06545 3
 8 -3 -6 9.42335 6.57687 1
 -8 -3 6 4.11943 6.97066 2
 8 -3 -6 5.96241 6.2107 3
 8 3 -6 -6.4193 5.0294 1
 -8 3 6 0.49402 6.08392 2
 -8 3 6 3.81963 8.21069 3
 7 -3 -6 8.38229 4.71644 3
 -7 -3 6 7.33752 6.22492 3
 -7 -3 6 0.67476 4.85695 2
 -7 3 6 -2.3122 6.06866 3
 -7 3 6 2.33721 4.92322 2
 7 3 -6 17.5676 4.68437 1
 -6 -3 6 5.03492 4.13896 2
 6 -3 -6 7.38923 3.91359 3
 -6 -3 6 6.08409 4.66567 3
 -6 3 6 7.16109 4.85327 3
 6 3 -6 5.38593 3.42132 1
 5 -3 -6 30.745 4.05816 3
 -5 -3 6 28.6866 4.1756 2
 -5 -3 6 37.3228 4.30218 3
 -5 3 6 29.7677 4.5939 3
 5 3 -6 33.7188 4.18972 1
 3 -3 -6 4.36536 2.34412 3
 -3 -3 6 5.44291 2.00451 3
 -3 -3 6 12.9196 2.74568 2
 3 3 -6 6.15884 2.67449 2
 3 3 -6 7.81395 2.32165 1
 -2 -3 6 51.9731 3.99349 2
 2 3 -6 51.1903 4.501 2
 2 3 -6 49.6808 3.73477 1
 -1 -3 6 201.674 6.31597 2
 1 3 -6 215.445 6.55739 2
 1 3 -6 213.79 5.74056 1
 0 -3 -6 99.7633 4.45515 1
 0 -3 6 102.008 3.21318 3
 0 3 6 74.3725 14.1306 4
 0 3 -6 101.349 3.00812 1
 0 3 -6 106.922 4.9525 2
 -1 -3 -6 2.96186 2.02886 1
 1 -3 6 2.86456 1.8584 3
 -1 -3 -6 3.23678 9.29544 4
 1 3 6 2.70858 1.88447 1
 -1 3 -6 2.53833 1.87237 3
 2 -3 6 112.702 4.55829 3
 -2 -3 -6 113.547 5.69855 1
 -2 -3 -6 107.396 3.04057 2
 2 -3 6 104.331 3.05105 1
 2 3 6 113.05 5.33807 1
 -2 3 -6 107.118 4.77888 3
 -3 -3 -6 298.205 7.1355 2
 -3 -3 -6 295.277 9.35223 1
 3 -3 6 294.591 7.26131 1
 3 -3 6 294.22 7.91358 3
 -3 3 -6 290.773 8.36592 3
 3 3 6 297.981 9.02898 1
 4 -3 6 68.98 4.85008 1
 -4 -3 -6 90.9604 6.37732 3
 -4 -3 -6 62.973 4.90087 2
 4 -3 6 74.6953 5.31812 3
 -4 -3 -6 85.861 6.43116 1
 -4 3 -6 75.5502 6.51973 3
 4 3 6 74.1663 5.5241 1
 -5 -3 -6 127.13 8.11228 3
 -5 -3 -6 115.848 6.75329 2
 5 -3 6 115.937 6.64777 1
 -5 -3 -6 123.03 8.18094 1
 5 -3 6 110.699 6.68245 3
 5 3 6 115.782 7.10767 1
 -5 3 -6 120.248 8.06109 3
 6 -3 6 4.14361 3.78431 3
 6 -3 6 5.47613 4.46437 1
 -6 -3 -6 3.00031 5.28009 3
 -6 -3 -6 0.84549 5.08278 1
 -6 -3 -6 2.58215 4.44952 2
 6 3 6 6.01475 4.10073 1
 -6 3 -6 -4.0487 5.25996 3
 7 -3 6 5.73465 4.6172 3
 -7 -3 -6 11.7184 6.20404 1
 7 -3 6 12.9562 6.10908 1
 -7 -3 -6 14.8378 7.23383 3
 -7 -3 -6 9.06548 5.94595 2
 7 3 6 4.7737 5.34964 1
 -7 3 -6 15.1887 7.53922 3
 -8 -3 -6 8.92229 8.15794 2
 8 -3 6 7.32174 5.81235 3
 8 -3 6 -5.3231 7.68881 1
 -8 -3 -6 -0.1149 9.50948 3
 -8 3 -6 9.45115 8.86364 3
 8 3 6 -12.263 7.02898 1
 9 -4 -6 1.82417 8.87209 3
 -9 -4 6 14.0943 11.4622 3
 -9 -4 6 -6.3377 10.0634 2
 9 -4 -6 6.56847 9.26269 1
 9 4 -6 -15.025 7.55161 1
 -9 4 6 2.43672 7.6812 2
 -9 4 6 30.1886 12.24 3
 8 -4 -6 18.5347 6.77612 3
 8 -4 -6 15.8567 7.2123 1
 -8 -4 6 17.5222 8.63523 3
 -8 -4 6 13.8239 7.77892 2
 -8 4 6 22.3179 9.21436 3
 -8 4 6 0.08863 6.10001 2
 8 4 -6 14.2204 6.29517 1
 7 -4 -6 2.93714 5.28456 3
 -7 -4 6 9.49168 6.39368 3
 -7 -4 6 4.89903 5.72881 2
 -7 4 6 7.6046 6.75253 3
 7 4 -6 1.16063 4.67933 1
 -6 -4 6 265.223 10.7707 2
 6 -4 -6 265.044 10.1289 3
 -6 -4 6 258.677 10.2036 3
 6 4 -6 268.133 10.699 1
 -5 -4 6 257.94 8.53547 3
 -5 -4 6 253.879 9.59518 2
 5 -4 -6 270.599 9.01679 3
 5 4 -6 265.752 9.70943 1
 5 4 -6 262.71 10.4593 2
 -4 -4 6 125.053 6.33223 2
 4 -4 -6 115.601 6.00673 3
 -4 -4 6 124.402 5.51541 3
 4 4 -6 122.409 6.40356 1
 4 4 -6 132.594 7.18097 2
 -3 -4 6 568.106 13.4345 2
 3 -4 -6 553.234 12.3956 3
 -3 -4 6 567.121 11.2679 3
 3 4 -6 554.521 13.7155 1
 3 4 -6 559.184 13.74 2
 -2 -4 6 15.7785 2.63823 2
 2 4 -6 21.3996 3.11992 2
 2 4 -6 18.2279 2.64972 1
 -1 -4 6 168.507 5.97757 2
 1 4 -6 168.265 5.25021 1
 1 4 -6 169.473 6.37681 2
 0 -4 6 485.473 9.37091 3
 0 -4 -6 467.3 11.4199 1
 0 4 -6 474.884 11.4651 2
 0 4 -6 436.341 9.60041 1
 -1 -4 -6 55.2994 4.39258 1
 1 -4 6 54.8968 3.55019 3
 1 4 6 57.5538 4.07002 1
 -2 -4 -6 50.0668 2.19863 2
 2 -4 6 56.247 4.02671 3
 -2 -4 -6 56.0091 5.06048 1
 -2 4 -6 61.7834 4.75764 3
 2 4 6 56.9917 4.52799 1
 3 -4 6 38.299 3.65338 3
 -3 -4 -6 34.8338 4.15421 1
 3 -4 6 34.2392 2.87051 1
 -3 -4 -6 39.061 15.6062 4
 -3 -4 -6 42.515 3.01925 2
 -3 4 -6 42.3698 4.26677 3
 3 4 6 34.4323 3.88298 1
 4 -4 6 278.887 8.97129 3
 4 -4 6 278.606 7.81933 1
 -4 -4 -6 288.418 9.49526 3
 -4 -4 -6 271.96 7.72029 2
 -4 -4 -6 284.528 10.098 1
 4 4 6 287.096 9.76563 1
 -4 4 -6 272.747 9.40577 3
 5 -4 6 175.952 8.01775 3
 -5 -4 -6 189.501 9.34013 3
 -5 -4 -6 197.658 7.51392 2
 -5 -4 -6 184.951 9.58036 1
 5 -4 6 184.298 7.83702 1
 -5 4 -6 177.374 9.54992 3
 5 4 6 187.099 8.60333 1
 -6 -4 -6 88.6084 9.53958 1
 -6 -4 -6 99.7442 9.86356 3
 6 -4 6 105.784 8.18556 1
 -6 -4 -6 109.726 7.86008 2
 6 -4 6 91.0714 8.04878 3
 -6 4 -6 104.654 10.4738 3
 6 4 6 107.585 7.87961 1
 -7 -4 -6 88.5281 9.16122 3
 7 -4 6 113.823 9.13161 3
 -7 -4 -6 103.727 11.8221 1
 -7 -4 -6 92.1134 9.90438 2
 7 -4 6 100.641 8.26624 1
 -7 4 -6 93.9506 9.45295 3
 7 4 6 102.483 9.21355 1
 -8 -4 -6 6.66754 7.97851 2
 8 -4 6 -2.835 6.29711 3
 8 -4 6 -1.6878 8.08102 1
 -8 -4 -6 -1.809 10.1562 3
 8 4 6 -3.8048 6.70151 1
 -8 4 -6 16.2109 9.63148 3
 8 -5 -6 7.57998 7.73845 1
 -8 -5 6 15.8178 8.53265 2
 -8 -5 6 -3.0842 8.74039 3
 8 -5 -6 17.7857 7.45872 3
 8 5 -6 -8.3003 6.08106 1
 7 -5 -6 47.2688 6.54418 3
 -7 -5 6 32.3726 7.12653 3
 -7 -5 6 51.5695 7.44762 2
 7 5 -6 41.4109 6.33695 1
 -6 -5 6 14.3033 5.18119 2
 6 -5 -6 7.25344 4.44742 3
 -6 -5 6 11.9195 5.07765 3
 6 5 -6 11.1553 4.28503 1
 -5 -5 6 27.8555 4.71016 2
 -5 -5 6 18.8969 4.26512 3
 5 -5 -6 30.4097 4.63366 3
 5 5 -6 28.9242 4.78882 1
 5 5 -6 24.1188 5.37 2
 4 -5 -6 196.199 7.70504 3
 -4 -5 6 194.572 6.98202 3
 -4 -5 6 191.132 7.94084 2
 4 5 -6 198.164 8.7642 2
 4 5 -6 198.829 8.32403 1
 -3 -5 6 118.191 6.05598 2
 3 -5 -6 126.195 6.0597 3
 3 5 -6 119.481 6.80311 2
 3 5 -6 109.712 6.14398 1
 -2 -5 6 40.0718 4.24286 2
 2 5 -6 38.2037 4.2472 1
 2 5 -6 45.3806 5.13076 2
 1 5 -6 3.8521 1.94553 1
 1 5 -6 3.29214 2.7494 2
 0 -5 6 189.844 5.51077 3
 0 -5 -6 182.086 6.66105 1
 0 5 -6 187.616 7.09998 2
 0 5 -6 175.038 4.79796 1
 -1 -5 -6 17.7985 13.8648 4
 1 -5 6 7.44924 2.37914 3
 -1 -5 -6 12.3853 2.97939 1
 1 5 6 12.689 1.65125 2
 1 5 6 8.30843 2.30083 1
 2 -5 6 3.28367 2.53203 3
 -2 -5 -6 2.04488 2.8536 1
 2 5 6 5.51563 2.34955 1
 3 -5 6 83.9559 5.51733 3
 -3 -5 -6 86.9219 3.74923 2
 -3 -5 -6 93.7045 6.50184 1
 3 5 6 82.7214 5.82783 1
 -3 5 -6 90.9614 6.56448 3
 4 -5 6 1.25962 3.35836 3
 -4 -5 -6 3.31634 2.4622 2
 -4 -5 -6 4.01622 3.90283 1
 4 -5 6 1.72493 2.35044 1
 -4 5 -6 1.70416 4.28018 3
 4 5 6 -1.6031 2.77726 1
 5 -5 6 81.1732 6.34205 1
 -5 -5 -6 89.6517 8.88982 1
 -5 -5 -6 88.8015 6.16732 2
 5 -5 6 94.2863 7.31181 3
 -5 -5 -6 89.429 8.83202 3
 5 5 6 75.2593 6.89154 1
 -5 5 -6 101.764 9.1511 3
 6 -5 6 3.07242 4.65021 1
 -6 -5 -6 -0.8141 4.34894 2
 6 -5 6 -2.2329 4.53471 3
 -6 -5 -6 3.84841 6.28944 3
 -6 -5 -6 10.7825 5.7877 1
 -6 5 -6 3.40571 6.35936 3
 6 5 6 -0.8876 3.7026 1
 7 -5 6 -6.388 6.14033 1
 -7 -5 -6 -4.189 7.53272 3
 -7 -5 -6 -0.1831 6.28477 1
 7 -5 6 -0.9443 5.43607 3
 -7 -5 -6 1.17182 6.01601 2
 7 5 6 1.27553 4.98041 1
 -7 5 -6 9.12062 8.17043 3
 8 -5 6 14.7862 6.82924 3
 -8 -5 -6 -7.4332 9.28445 1
 8 -5 6 8.73623 8.50835 1
 -8 -5 -6 20.1484 8.58224 2
 -8 -5 -6 4.71327 11.5751 3
 8 5 6 14.0039 7.20521 1
 -8 5 -6 16.2657 10.9741 3
 -8 -6 6 58.6559 10.266 2
 -8 -6 6 59.7263 10.5371 3
 8 -6 -6 75.1551 9.8895 3
 8 -6 -6 82.2396 10.3141 1
 8 6 -6 72.6068 9.091 1
 -7 -6 6 51.5372 7.71904 2
 7 -6 -6 35.2987 6.80675 3
 -7 -6 6 58.8894 8.08421 3
 7 6 -6 52.1618 7.28859 1
 -6 -6 6 5.36751 5.37658 2
 -6 -6 6 5.20061 5.39842 3
 6 -6 -6 13.9679 5.19766 3
 6 6 -6 13.3883 7.16116 2
 6 6 -6 7.34275 5.00906 1
 -5 -6 6 -1.0668 4.30222 3
 5 -6 -6 8.58649 4.33631 3
 -5 -6 6 4.17087 4.14338 2
 5 6 -6 2.07248 5.23944 2
 5 6 -6 3.24693 4.37727 1
 -4 -6 6 223.663 69.4886 4
 -4 -6 6 181.446 7.52798 3
 -4 -6 6 187.148 8.39683 2
 4 -6 -6 178.698 8.01843 3
 4 6 -6 171.778 9.02043 2
 4 6 -6 185.415 8.76615 1
 -3 -6 6 22.3613 3.67756 2
 3 -6 -6 23.564 3.6652 3
 3 6 -6 24.4704 4.48647 2
 3 6 -6 17.6466 3.63337 1
 -2 -6 6 126.616 6.30558 2
 2 6 -6 118.839 5.95012 1
 2 6 -6 125.483 7.10251 2
 1 -6 -6 350.09 10.0153 1
 -1 -6 6 369.49 9.53483 1
 1 6 -6 355.345 9.21068 1
 1 6 -6 356.221 10.6504 2
 0 -6 -6 263.886 8.67557 1
 0 -6 6 257.117 7.35638 3
 0 -6 6 256.125 6.9341 1
 0 6 -6 257.534 9.11645 2
 0 6 -6 265.249 6.58763 1
 -1 -6 -6 77.7557 5.83586 1
 1 -6 6 79.1567 4.99103 3
 1 6 6 77.9411 3.83672 2
 2 -6 6 257.461 8.04786 3
 -2 -6 -6 255.656 9.3136 1
 2 6 6 265.947 8.9574 1
 2 6 6 258.036 6.36863 2
 3 -6 6 2.39986 3.56402 3
 -3 -6 -6 2.28102 3.79095 1
 3 6 6 -2.661 2.28927 1
 4 -6 6 21.9706 4.7274 3
 -4 -6 -6 31.4144 5.14734 1
 4 -6 6 23.6118 2.66499 1
 -4 -6 -6 30.888 3.40524 2
 -4 6 -6 35.2438 5.64279 3
 4 6 6 17.2168 3.7792 1
 5 -6 6 82.0897 6.61089 3
 5 -6 6 74.808 6.0652 1
 -5 -6 -6 82.3275 9.1775 1
 -5 -6 -6 80.8792 7.11347 3
 -5 -6 -6 73.2427 6.17933 2
 5 6 6 76.108 7.01508 1
 -5 6 -6 71.3443 7.07197 3
 -6 -6 -6 40.858 7.55396 3
 -6 -6 -6 57.1359 5.82564 2
 6 -6 6 47.8237 5.56095 1
 6 -6 6 55.4443 6.42167 3
 -6 -6 -6 70.2436 8.10419 1
 -6 6 -6 62.1173 8.37407 3
 6 6 6 59.3647 5.91045 1
 -7 -6 -6 19.6452 6.44825 2
 7 -6 6 15.3605 6.53978 3
 -7 -6 -6 21.9626 7.44862 1
 7 -6 6 12.4804 6.79467 1
 -7 -6 -6 28.6897 9.06985 3
 -7 6 -6 25.6946 9.60998 3
 7 6 6 19.7047 6.0145 1
 8 -6 6 10.6417 7.99874 3
 -8 -6 -6 6.06822 8.61018 2
 -8 -6 -6 -9.5098 9.24962 1
 -8 -6 -6 1.6138 12.626 3
 8 -6 6 -0.9881 8.57387 1
 8 6 6 -11.951 7.30429 1
 -8 6 -6 0.26697 11.9352 3
 -8 -7 6 -9.7794 10.4888 3
 8 -7 -6 0.2686 8.72177 3
 -8 -7 6 -12.031 9.24499 2
 8 7 -6 4.704 8.8746 1
 -7 -7 6 51.9001 9.07854 3
 7 -7 -6 48.1533 8.02125 3
 -7 -7 6 53.0571 8.58577 2
 7 7 -6 59.4501 8.59214 1
 -6 -7 6 3.01745 5.98122 3
 6 -7 -6 2.00146 5.2342 3
 -6 -7 6 8.87659 5.87181 2
 6 7 -6 7.08034 7.64513 2
 6 7 -6 -5.3072 5.80079 1
 -5 -7 6 7.94106 4.91025 3
 -5 -7 6 112.901 78.079 4
 5 -7 -6 18.7835 5.11144 3
 -5 -7 6 8.63526 5.05396 2
 5 7 -6 3.99961 4.97382 1
 5 7 -6 16.7929 6.39828 2
 -4 -7 6 200.223 77.1653 4
 3 -7 -6 14.7784 4.09926 3
 -3 -7 6 12.082 3.82186 2
 3 7 -6 22.4373 5.07289 2
 3 7 -6 12.2786 3.90738 1
 2 -7 -6 374.985 11.0447 1
 -2 -7 6 393.403 11.3509 1
 2 7 -6 373.011 11.988 2
 2 7 -6 368.06 10.818 1
 -1 -7 6 36.191 3.83756 1
 1 -7 -6 26.428 3.82025 1
 1 7 -6 31.6721 4.62163 2
 1 7 -6 25.7951 3.26406 1
 0 -7 6 109.758 5.95436 3
 0 -7 6 108.838 5.25681 1
 0 -7 -6 120.746 6.77496 1
 0 7 -6 110.04 4.39526 1
 0 7 -6 119.798 7.56314 2
 1 -7 6 96.3403 6.00346 3
 1 -7 6 96.6514 3.87007 1
 -1 -7 -6 86.4359 6.64122 1
 -1 7 -6 97.1227 7.35225 2
 1 7 6 98.1495 4.9461 2
 -2 -7 -6 68.286 7.05463 1
 2 -7 6 70.9476 6.409 3
 -2 -7 -6 80.5981 23.4673 4
 2 7 6 68.988 4.54185 2
 2 7 6 71.9703 5.908 1
 -3 -7 -6 37.1468 5.78863 1
 3 -7 6 36.5336 4.83876 3
 3 7 6 39.8014 4.95531 1
 4 -7 6 -1.4083 4.51654 3
 -4 -7 -6 4.55642 3.08104 2
 -4 -7 -6 8.49039 4.92614 1
 4 7 6 -0.0834 3.45863 1
 5 -7 6 6.02805 3.17781 1
 -5 -7 -6 18.8626 4.03315 2
 -5 -7 -6 10.2535 5.6858 1
 5 -7 6 21.9983 5.57913 3
 5 7 6 14.9127 4.58731 1
 -6 -7 -6 17.271 8.19095 3
 -6 -7 -6 20.3345 6.4887 1
 6 -7 6 6.81507 6.34511 3
 -6 -7 -6 6.90251 5.20964 2
 6 -7 6 2.33433 4.67172 1
 6 7 6 -7.1527 4.69903 1
 -6 7 -6 9.33531 8.22687 3
 -7 -7 -6 -3.4502 7.81494 1
 -7 -7 -6 6.60517 10.3209 3
 7 -7 6 -7.1772 6.56514 1
 -7 -7 -6 -3.3941 6.48435 2
 7 -7 6 -11.828 6.45435 3
 -7 7 -6 14.1884 10.3983 3
 7 7 6 -13.289 5.70458 1
 -7 -8 6 24.287 9.35501 3
 7 -8 -6 10.6785 7.5397 3
 -7 -8 6 28.9617 9.45642 2
 7 8 -6 45.4722 9.04779 1
 -6 -8 6 38.2289 7.39612 2
 -6 -8 6 40.4999 7.93754 3
 6 -8 -6 35.562 6.74658 3
 6 8 -6 51.9874 8.71435 1
 6 8 -6 54.6283 10.3218 2
 -5 -8 6 198.269 93.5124 4
 -5 -8 6 87.3763 9.8125 2
 -5 -8 6 97.919 7.69447 3
 5 -8 -6 76.5472 7.27546 3
 5 8 -6 88.5357 8.88198 2
 5 8 -6 101.007 10.3229 1
 -4 -8 6 5.69178 4.79609 2
 4 -8 -6 -4.43 4.36625 3
 4 8 -6 -0.8366 4.57206 1
 4 8 -6 -3.6523 5.82471 2
 3 -8 -6 2.36605 4.21728 3
 -3 -8 6 4.76592 4.27185 2
 3 8 -6 -2.2324 3.78995 1
 3 8 -6 4.57192 5.40262 2
 -2 -8 6 11.3601 4.37886 1
 2 -8 -6 17.2041 3.85266 1
 2 8 -6 14.3965 5.08953 2
 2 8 -6 12.3787 3.54361 1
 -1 -8 6 646.646 15.7743 1
 1 -8 -6 658.737 16.9487 1
 1 8 -6 642.668 15.3236 1
 1 8 -6 668.98 17.5225 2
 0 -8 -6 41.032 5.14804 1
 0 -8 6 40.94 3.8846 1
 0 -8 6 36.8276 4.44968 3
 0 -8 -6 24.3828 20.7499 4
 0 8 6 35.8317 4.04543 2
 0 8 -6 33.5557 5.00468 2
 1 -8 6 2.81211 3.67341 3
 1 -8 6 3.60706 2.45456 1
 -1 -8 -6 9.79334 22.3708 4
 -1 -8 -6 2.47882 3.87147 1
 1 8 6 4.44654 3.10455 2
 -1 8 -6 3.20951 4.32293 2
 2 -8 6 79.577 7.76573 3
 -2 -8 -6 74.4528 27.4919 4
 -2 -8 -6 85.6811 8.27811 1
 2 8 6 78.6922 5.85545 2
 2 8 6 93.6631 6.94386 1
 3 -8 6 15.9737 4.88084 3
 -3 -8 -6 13.7759 5.53873 1
 3 8 6 16.4734 3.58484 2
 3 8 6 15.4823 4.25523 1
 4 -8 6 29.2736 6.08284 3
 -4 -8 -6 36.1083 6.70043 1
 4 8 6 27.6243 5.1646 1
 -5 -8 -6 38.5144 5.11768 2
 -5 -8 -6 26.9857 7.37582 1
 5 -8 6 41.6782 7.22914 3
 5 8 6 32.2037 5.96957 1
 6 -8 6 28.8838 4.34177 1
 -6 -8 -6 25.1085 6.08409 2
 6 -8 6 27.6194 8.24518 3
 -6 -8 -6 45.2412 8.21652 1
 -6 -8 -6 26.4332 10.0484 3
 6 8 6 17.4059 6.04334 1
 -7 -8 -6 41.2048 7.93225 2
 7 -8 6 31.1921 9.0906 3
 -7 -8 -6 30.3632 10.1168 1
 7 -8 6 31.6586 6.48328 1
 -7 -8 -6 17.4851 12.1076 3
 7 8 6 24.911 7.78053 1
 6 -9 -6 55.0347 7.58107 3
 -6 -9 6 59.6039 9.34296 3
 -6 -9 6 52.8574 9.17198 2
 6 9 -6 70.3368 12.2074 2
 6 9 -6 48.8276 9.07607 1
 5 -9 -6 43.821 7.43377 3
 -5 -9 6 46.979 7.79371 3
 -5 -9 6 56.8163 7.78018 2
 5 9 -6 49.851 9.21956 2
 5 9 -6 39.555 7.28187 1
 4 -9 -6 95.5866 9.33422 3
 -4 -9 6 116.846 10.4878 2
 4 9 -6 107.091 9.47313 2
 4 9 -6 106.921 9.4893 1
 3 -9 -6 -0.058 4.2133 1
 3 -9 -6 5.04763 4.50089 3
 3 9 -6 3.14815 6.2834 2
 3 9 -6 -0.9388 4.2408 1
 2 -9 -6 356.923 12.2643 1
 -2 -9 6 361.086 12.6876 1
 2 9 -6 340.27 13.7381 2
 2 9 -6 352.379 11.5002 1
 -1 -9 6 48.5575 5.25695 1
 1 -9 -6 54.7902 5.85783 1
 1 9 -6 40.1973 4.17876 1
 1 9 -6 57.7567 7.00082 2
 0 -9 6 76.9786 6.26754 3
 0 -9 6 64.3375 6.66085 1
 0 -9 -6 77.9879 8.24205 1
 0 9 -6 86.352 7.79319 2
 0 9 6 79.6721 7.2903 2
 1 -9 6 167.259 6.51017 1
 -1 -9 -6 152.765 10.3212 1
 1 -9 6 160.603 8.93969 3
 1 9 6 159.678 7.83385 2
 -1 9 -6 178.389 10.695 2
 2 -9 6 2.07846 4.95906 3
 -2 -9 -6 4.46695 5.70416 1
 2 9 6 2.76778 4.17878 2
 -3 -9 -6 54.0123 7.83629 1
 3 -9 6 51.0505 6.8951 3
 3 9 6 65.4574 6.95231 2
 3 9 6 41.7498 5.77454 1
 4 -9 6 14.1972 6.74446 3
 -4 -9 -6 26.9513 7.69564 1
 4 9 6 16.0951 5.98587 1
 -5 -9 -6 25.2266 8.58608 1
 5 -9 6 16.9496 7.84206 3
 5 9 6 16.5784 5.94947 1
 6 -9 6 25.0044 9.63154 3
 -6 -9 -6 34.8484 12.0182 3
 -6 -9 -6 53.391 10.3993 1
 6 9 6 25.6689 7.33543 1
 -6 -10 6 39.1933 10.1488 2
 -6 -10 6 27.7565 10.4173 3
 6 10 -6 10.97 9.11292 1
 6 10 -6 50.2053 13.738 2
 5 -10 -6 1.7069 7.63217 3
 5 10 -6 3.2913 7.13368 1
 5 10 -6 6.01791 10.0232 2
 4 -10 -6 -3.6861 5.46317 1
 4 -10 -6 -16.426 5.65284 3
 4 10 -6 -1.8317 8.36835 2
 4 10 -6 3.2922 5.90547 1
 3 -10 -6 12.2865 5.10682 3
 3 -10 -6 1.78622 5.24905 1
 3 -10 -6 -19.046 39.6371 4
 3 10 -6 2.63731 7.42739 2
 3 10 -6 -3.9538 4.93608 1
 2 -10 -6 7.12264 5.12428 1
 -2 -10 6 5.78075 5.77473 1
 2 10 -6 0.11811 4.17219 1
 2 10 -6 7.47273 7.01809 2
 -1 -10 6 3.91743 5.06223 1
 1 -10 -6 4.4974 5.19174 1
 1 10 -6 3.39009 3.48625 1
 1 10 -6 1.95726 6.23911 2
 0 -10 6 9.66506 4.53068 1
 0 -10 -6 11.0999 5.88219 1
 0 -10 6 12.4636 5.5945 3
 0 10 6 8.40428 5.05488 2
 0 10 -6 5.48108 6.69268 2
 1 -10 6 154.285 7.13928 1
 1 -10 6 137.023 10.5964 3
 -1 -10 -6 135.557 11.7186 1
 1 10 6 152.949 8.87269 2
 -1 10 -6 167.74 12.6574 2
 -2 -10 -6 56.3184 8.33896 1
 2 -10 6 51.2415 7.27338 3
 2 10 6 59.2026 6.01337 2
 -2 10 -6 52.8811 8.53599 2
 3 -10 6 4.20233 6.87259 3
 -3 -10 -6 -2.1827 7.67992 1
 3 10 6 8.4178 5.67322 1
 3 10 6 11.5398 4.93957 2
 -4 -10 -6 -2.1204 8.65522 1
 4 -10 6 1.00153 7.94307 3
 4 10 6 -6.3986 6.03724 1
 -5 -10 -6 11.0698 10.1361 1
 5 -10 6 13.3023 9.39164 3
 5 10 6 6.85417 7.46627 1
 4 -11 -6 21.9212 7.6327 1
 4 -11 -6 30.6805 7.79294 3
 4 11 -6 31.0456 10.9179 2
 4 11 -6 20.4524 7.37112 1
 3 -11 -6 34.6931 7.38103 3
 3 -11 -6 23.9547 7.28787 1
 3 11 -6 38.6458 9.81104 2
 3 11 -6 25.6454 6.76194 1
 2 -11 -6 80.5303 8.58587 1
 -2 -11 6 89.8582 9.07368 1
 2 -11 -6 88.9454 8.24283 3
 2 11 -6 96.4098 10.659 2
 2 11 -6 84.0632 9.18001 1
 -1 -11 6 24.069 6.2663 1
 1 -11 -6 14.2034 6.81206 1
 1 11 -6 28.3572 8.3632 2
 -1 11 6 10.8044 6.51517 2
 0 -11 6 77.3677 8.06074 3
 0 -11 6 83.7867 6.83483 1
 0 -11 -6 77.1608 8.77639 1
 0 11 -6 86.57 9.93708 2
 0 11 6 79.4299 7.64031 2
 -1 -11 -6 49.7992 8.56918 1
 1 -11 6 36.7938 7.31794 3
 -1 11 -6 44.2997 9.59029 2
 1 11 6 53.8382 6.80242 2
 -2 -11 -6 3.24965 8.36985 1
 2 -11 6 0.07406 7.27462 3
 2 11 6 3.14296 6.08859 2
 -2 11 -6 -2.342 8.51365 2
 3 -11 6 83.1732 10.0306 3
 -3 -11 -6 85.894 11.6743 1
 3 11 6 89.6054 9.84247 2
 -4 -11 -6 -0.7702 10.9104 1
 4 -11 6 12.5426 9.58226 3
 4 11 6 19.1404 8.28032 1
 3 -12 -6 4.61564 8.73027 1
 3 -12 -6 -16.69 7.67204 3
 3 12 -6 -7.0816 6.64117 1
 3 12 -6 -3.8011 11.5451 2
 2 -12 -6 9.12596 7.80572 3
 2 -12 -6 2.5711 8.33367 1
 2 12 -6 19.5982 10.2818 2
 -2 12 6 7.2682 8.96157 2
 1 -12 -6 5.60101 8.27512 1
 -1 -12 6 2.38419 7.82103 3
 -1 12 6 -2.1287 8.21147 2
 1 12 -6 1.39874 9.60365 2
 0 -12 6 8.33129 8.02339 3
 0 -12 -6 -4.0797 8.34106 1
 0 12 6 -0.9678 7.63369 2
 0 12 -6 6.58259 10.3079 2
 1 -12 6 -0.1018 8.57118 3
 -1 -12 -6 6.81625 9.41933 1
 -1 12 -6 10.9326 10.1501 2
 1 12 6 2.39742 7.51135 2
 -2 -12 -6 12.3944 10.9477 1
 2 -12 6 -2.362 9.61056 3
 2 12 6 -3.1597 7.58836 2
 -2 12 -6 23.2638 11.0618 2
 -3 -12 -6 13.9609 12.4777 1
 -3 12 -6 -4.8923 12.12 2
 3 12 6 16.7804 7.46639 2
 -9 0 7 2.37986 10.0776 3
 9 0 -7 -9.6607 6.9045 1
 9 0 -7 6.32779 8.09947 3
 -9 0 7 -2.7307 8.0323 2
 8 0 -7 5.80097 5.01985 1
 -8 0 7 10.7037 7.62978 3
 -8 0 7 2.0617 5.78214 2
 8 0 -7 0.86625 5.85368 3
 7 0 -7 -9.8094 3.66912 1
 7 0 -7 0.65014 4.25627 3
 -7 0 7 -5.8595 4.37234 2
 -7 0 7 -0.0044 5.71316 3
 -6 0 7 0.55511 4.28606 3
 6 0 -7 -0.5121 3.18492 1
 -6 0 7 -3.0102 3.77125 2
 6 0 -7 0.36652 3.26712 3
 -5 0 7 -0.3496 3.23301 2
 5 0 -7 -0.0093 2.46194 3
 -5 0 7 7.01556 3.42318 3
 -4 0 7 -2.5974 2.34045 2
 -4 0 7 1.21364 2.48888 3
 4 0 -7 -0.9751 1.98952 3
 -3 0 7 0.09331 1.99497 3
 -3 0 7 1.10233 2.03015 2
 3 0 -7 0.51462 1.79545 3
 2 0 -7 -1.9677 1.31548 3
 -2 0 7 0.78199 1.83327 2
 2 0 -7 0.51222 2.07917 2
 -1 0 7 0.27317 1.57972 2
 1 0 -7 -1.2135 1.68778 2
 0 0 -7 3.03585 1.48158 2
 0 0 7 2.26268 1.45562 2
 -1 0 -7 -1.2195 1.40005 3
 -1 0 -7 1.16706 1.43994 1
 -2 0 -7 1.26736 1.82412 1
 2 0 7 -2.0902 1.67077 1
 -2 0 -7 0.30033 1.91251 3
 3 0 7 -1.8618 1.94449 1
 3 0 7 1.38364 2.01645 3
 -3 0 -7 1.21367 2.30761 3
 -3 0 -7 3.69073 2.33865 1
 -4 0 -7 3.18544 2.74014 1
 -4 0 -7 -0.038 3.08883 3
 4 0 7 -4.0753 2.34735 3
 4 0 7 3.60995 2.56771 1
 5 0 7 0.56798 3.30228 1
 -5 0 -7 -4.3816 3.63309 1
 -5 0 -7 5.8109 4.49985 3
 5 0 7 3.49396 2.64312 3
 6 0 7 2.41749 3.78658 3
 6 0 7 4.19353 4.46205 1
 -6 0 -7 4.39869 5.72977 3
 -7 0 -7 16.8955 6.94515 3
 7 0 7 0.65795 5.63128 1
 -8 0 -7 6.53632 9.21991 3
 8 0 7 0.70368 7.67364 1
 -9 0 -7 10.0149 11.9903 3
 9 0 7 -5.3533 10.3915 1
 -9 0 -7 -7.225 9.71721 2
 9 -1 -7 9.14949 7.77839 3
 9 -1 -7 5.34119 7.20246 1
 -9 -1 7 17.1383 10.2353 3
 -9 -1 7 9.80707 9.01082 2
 -9 1 7 13.0243 10.4745 3
 9 1 -7 -2.1981 7.30967 1
 -9 1 7 0.81032 8.23683 2
 8 -1 -7 113.725 10.3573 3
 8 -1 -7 118.396 10.4323 1
 -8 -1 7 101.154 9.32103 3
 -8 -1 7 113.249 11.8801 2
 8 1 -7 104.988 10.3577 3
 8 1 -7 84.5595 9.34501 1
 -8 1 7 117.224 9.90364 3
 -8 1 7 105.172 9.53092 2
 7 -1 -7 10.4029 4.40105 3
 -7 -1 7 5.10484 4.7661 2
 7 -1 -7 3.77741 4.52679 1
 -7 -1 7 11.0202 5.81816 3
 -7 1 7 11.1549 5.98051 3
 7 1 -7 -1.0706 3.89549 1
 -7 1 7 2.45831 4.497 2
 7 1 -7 12.1786 4.34444 3
 -6 -1 7 317.35 11.2565 2
 6 -1 -7 297.887 9.60608 3
 -6 -1 7 295.922 10.1785 3
 6 1 -7 300.493 10.7899 1
 6 1 -7 302.062 9.256 3
 -6 1 7 303.298 10.9088 3
 -6 1 7 308.321 11.0679 2
 -5 -1 7 11.3117 3.52741 3
 -5 -1 7 9.26253 3.25652 2
 5 -1 -7 18.1798 3.26291 3
 -5 1 7 13.8484 3.79265 3
 -5 1 7 10.9632 3.41773 2
 5 1 -7 16.8641 2.91329 3
 5 1 -7 11.4099 3.24019 1
 -4 -1 7 467.592 11.9881 2
 4 -1 -7 454.712 10.2516 3
 -4 -1 7 463.263 10.1093 3
 -4 1 7 461.937 11.9265 2
 -4 1 7 473.8 10.6307 3
 4 1 -7 473.683 9.92655 3
 3 -1 -7 493.394 10.1127 3
 -3 -1 7 490.594 11.8889 2
 -3 -1 7 504.553 9.74609 3
 -3 1 7 496.396 10.3403 3
 -3 1 7 489.234 11.741 2
 3 1 -7 491.283 12.0156 2
 3 1 -7 494.72 9.56916 3
 -2 -1 7 0.51246 2.02015 2
 2 -1 -7 1.33501 1.46253 3
 -2 -1 7 1.65011 1.24154 3
 2 1 -7 2.96133 2.0216 2
 2 1 -7 -0.5828 0.9677 3
 -2 1 7 1.37878 1.94202 2
 -1 -1 7 2565.98 48.1188 2
 1 -1 -7 2631.52 47.7255 2
 -1 1 7 2592.36 47.7201 2
 1 1 -7 2554.63 48.0926 2
 0 -1 -7 563.429 11.0458 2
 0 -1 7 539.011 11.7953 2
 0 1 -7 587.338 9.90373 3
 0 1 -7 562.697 11.8891 2
 0 1 7 557.79 11.061 2
 1 -1 7 20.7925 1.80821 3
 -1 -1 -7 24.3494 2.10748 2
 -1 -1 -7 19.3577 2.23108 1
 -1 1 -7 18.9305 1.84168 3
 1 1 7 18.1768 2.07522 1
 -1 1 -7 21.4715 2.32543 1
 -2 -1 -7 47.9874 3.74261 3
 2 -1 7 51.7449 3.19025 1
 -2 -1 -7 43.4767 3.92532 1
 2 -1 7 50.7803 3.32407 3
 -2 1 -7 47.839 3.7407 3
 2 1 7 46.8624 3.79304 1
 -2 1 -7 47.7279 3.17082 1
 3 -1 7 1.03239 1.98239 3
 -3 -1 -7 3.86225 2.45096 3
 -3 -1 -7 4.21726 2.54518 1
 3 -1 7 -0.1155 1.82834 1
 3 1 7 1.24098 2.18342 1
 -3 1 -7 2.8389 2.12392 1
 -3 1 -7 1.58629 2.90032 3
 4 -1 7 59.2765 4.5166 3
 -4 -1 -7 65.318 5.75368 1
 4 -1 7 53.3301 4.72897 1
 -4 -1 -7 58.8082 5.49707 3
 4 1 7 58.7736 4.90614 1
 -4 1 -7 58.8324 4.88055 3
 -4 1 -7 56.6178 5.19124 1
 -5 -1 -7 81.9225 7.27735 1
 5 -1 7 78.1468 6.43151 1
 5 -1 7 75.8437 5.67199 3
 -5 -1 -7 78.5302 7.08009 3
 5 1 7 82.9885 6.46213 1
 -5 1 -7 79.3176 7.19501 3
 -6 -1 -7 181.683 10.1366 3
 -6 -1 -7 201.67 10.6297 1
 6 -1 7 218.39 10.1202 1
 6 -1 7 172.684 8.50702 3
 -6 1 -7 174.952 10.5366 3
 6 1 7 218.994 10.0102 1
 7 -1 7 121.457 10.9759 1
 -7 -1 -7 115.878 11.4781 3
 7 -1 7 109.519 8.79251 3
 7 1 7 93.6582 10.5158 1
 -7 1 -7 118.172 9.51174 3
 -8 -1 -7 -3.8301 6.89597 2
 8 -1 7 3.7067 7.65959 1
 -8 -1 -7 12.1169 9.03067 3
 8 -1 7 -11.043 5.22084 3
 8 1 7 3.83242 7.51138 1
 -8 1 -7 1.60134 8.68627 3
 9 -1 7 49.645 11.737 1
 -9 -1 -7 79.3971 13.6729 3
 -9 -1 -7 41.8379 11.4398 2
 9 1 7 66.9153 11.8468 1
 -9 1 -7 56.7414 12.4252 3
 -9 -2 7 13.6666 9.07243 2
 9 -2 -7 5.50037 7.94056 3
 -9 -2 7 5.06344 10.1435 3
 9 -2 -7 -2.9427 7.86879 1
 -9 2 7 -14.219 7.16334 2
 9 2 -7 -7.6522 6.46644 1
 -9 2 7 8.2256 10.8315 3
 8 -2 -7 -2.2272 5.69387 1
 -8 -2 7 0.24267 7.49778 3
 -8 -2 7 2.49542 6.2122 2
 8 -2 -7 7.07903 6.00928 3
 -8 2 7 -7.8544 5.56307 2
 8 2 -7 7.12096 4.94348 1
 -8 2 7 7.05208 8.30829 3
 7 -2 -7 -0.8442 4.6652 3
 7 -2 -7 3.4928 4.70328 1
 -7 -2 7 1.3521 5.79457 3
 -7 -2 7 4.10902 5.05284 2
 -7 2 7 -3.8554 4.7585 2
 7 2 -7 4.68772 3.75971 1
 -7 2 7 1.21877 6.06915 3
 6 -2 -7 25.8771 4.30854 3
 -6 -2 7 25.7863 4.57896 2
 -6 -2 7 24.3383 4.98818 3
 6 2 -7 20.9539 4.08524 1
 -6 2 7 23.7715 5.11674 3
 -6 2 7 22.6339 4.71712 2
 -5 -2 7 1.27263 3.48675 3
 5 -2 -7 -1.8311 2.86499 3
 -5 -2 7 4.70321 3.30029 2
 -5 2 7 -1.691 2.94953 2
 -5 2 7 -1.0714 3.59001 3
 5 2 -7 0.11484 2.87268 1
 -4 -2 7 23.2185 3.26067 2
 -4 -2 7 29.377 3.15924 3
 4 -2 -7 33.2791 3.43473 3
 -4 2 7 28.9271 3.45064 2
 -4 2 7 32.6364 3.53001 3
 4 2 -7 27.0322 3.50126 1
 4 2 -7 28.3477 3.78277 2
 3 -2 -7 511.855 10.8678 3
 -3 -2 7 522.036 10.033 3
 -3 -2 7 523.833 12.3645 2
 3 2 -7 504.347 12.404 2
 -3 2 7 528.17 12.3333 2
 -2 -2 7 183.411 3.97778 3
 2 -2 -7 189.575 5.2815 3
 -2 -2 7 182.008 6.11005 2
 -2 2 7 187.794 5.79388 2
 2 2 -7 187.433 6.32963 2
 0 -2 7 130.32 3.16499 3
 0 2 -7 137.096 11.3741 4
 0 2 -7 131.198 3.20084 3
 0 2 -7 128.544 4.9581 2
 0 2 7 128.978 3.31591 2
 1 -2 7 67.2455 3.04864 3
 -1 -2 -7 62.4465 4.12672 1
 -1 2 -7 64.7747 3.15077 3
 1 2 7 64.6163 3.95217 1
 -1 2 -7 66.6096 2.44714 1
 -2 -2 -7 129.716 5.59903 1
 2 -2 7 131.337 4.02155 1
 2 -2 7 133.994 4.61192 3
 -2 -2 -7 117.339 12.0021 4
 2 2 7 135.264 5.48078 1
 -2 2 -7 132.262 5.02487 3
 -2 2 -7 132.422 3.99259 1
 -3 -2 -7 192.828 6.72498 3
 3 -2 7 197.346 6.19685 3
 -3 -2 -7 183.539 7.23089 1
 3 -2 7 183.585 5.71495 1
 -3 2 -7 193.992 5.77373 1
 -3 2 -7 189.55 6.65759 3
 3 2 7 192.43 6.95505 1
 4 -2 7 100.67 5.21371 1
 4 -2 7 97.4744 5.44445 3
 -4 -2 -7 107.297 6.47408 3
 -4 -2 -7 100.953 6.6408 1
 4 2 7 101.776 6.03024 1
 -4 2 -7 107.5 6.59098 3
 -5 -2 -7 7.67761 4.01404 1
 5 -2 7 8.19204 3.20998 3
 5 -2 7 4.12726 3.35427 1
 -5 -2 -7 7.79947 4.03327 3
 5 2 7 4.21263 3.42044 1
 -5 2 -7 -5.7088 4.10595 3
 6 -2 7 74.8269 7.80588 1
 -6 -2 -7 71.3331 7.67697 2
 6 -2 7 80.6085 7.07466 3
 -6 -2 -7 78.522 6.87689 3
 -6 -2 -7 86.1672 9.44569 1
 -6 2 -7 79.2966 7.02136 3
 6 2 7 74.8867 8.11804 1
 -7 -2 -7 -4.7528 5.32202 2
 7 -2 7 5.87494 5.85536 1
 7 -2 7 4.24121 4.73125 3
 -7 -2 -7 -4.4026 6.36821 1
 -7 -2 -7 -2.5643 6.70987 3
 7 2 7 5.22658 5.82113 1
 -7 2 -7 -0.2275 6.92487 3
 8 -2 7 3.32886 7.50161 1
 -8 -2 -7 -7.638 9.14 3
 -8 -2 -7 0.12608 7.58345 2
 8 -2 7 9.30256 5.82301 3
 -8 2 -7 6.64351 8.44351 3
 8 2 7 -9.7399 7.24895 1
 9 -3 -7 9.87595 8.66841 1
 9 -3 -7 12.4254 8.62791 3
 -9 -3 7 16.4277 10.6427 3
 -9 -3 7 9.80254 9.65226 2
 -9 3 7 -9.2799 7.75473 2
 -9 3 7 16.938 11.6127 3
 9 3 -7 8.15391 7.20521 1
 -8 -3 7 93.9377 9.43482 2
 8 -3 -7 87.3545 8.15473 3
 -8 -3 7 101.914 9.56888 3
 8 -3 -7 118.896 12.399 1
 8 3 -7 84.0884 9.1591 1
 -8 3 7 96.7688 9.04821 2
 -8 3 7 119.104 10.6352 3
 7 -3 -7 5.24767 4.71533 3
 -7 -3 7 -3.1699 5.18707 2
 -7 -3 7 1.12144 6.29414 3
 7 3 -7 5.44516 4.19871 1
 -7 3 7 -1.9295 4.81499 2
 -7 3 7 -0.0229 6.10481 3
 -6 -3 7 179.179 9.04674 2
 -6 -3 7 174.914 8.78979 3
 6 -3 -7 179.492 8.11414 3
 -6 3 7 176.113 9.65763 3
 -6 3 7 160.557 9.06638 2
 6 3 -7 137.907 8.35204 1
 -5 -3 7 225.954 8.80176 2
 -5 -3 7 232.802 7.83855 3
 5 -3 -7 227.56 8.20648 3
 5 3 -7 238.592 9.91153 2
 -5 3 7 232.932 8.96452 3
 5 3 -7 215.667 8.7348 1
 -4 -3 7 831.202 15.9559 3
 4 -3 -7 822.968 16.9443 3
 -4 -3 7 832.512 18.7308 2
 4 3 -7 837.269 18.9769 2
 4 3 -7 839.585 19.3199 1
 -3 -3 7 902.354 52.0776 4
 3 -3 -7 773.682 15.7183 3
 -3 -3 7 784.766 14.4753 3
 -3 -3 7 770.633 17.4099 2
 3 3 -7 756.797 17.4542 2
 3 3 -7 797.094 17.94 1
 -2 -3 7 49.0136 4.01468 2
 -2 -3 7 55.8971 2.51007 3
 2 3 -7 58.5243 4.71786 2
 2 3 -7 53.1348 3.94983 1
 -1 -3 7 1271.64 25.7187 2
 1 3 -7 1289.6 25.8229 2
 1 3 -7 1329.22 25.7309 1
 0 -3 -7 1.60765 8.82037 4
 0 -3 -7 -0.9939 1.65771 1
 0 -3 7 1.67169 1.36703 3
 0 3 7 0.8374 1.07099 2
 0 3 -7 0.33527 2.29505 2
 0 3 -7 2.09087 1.20641 1
 1 -3 7 84.1886 3.66611 3
 -1 -3 -7 90.2468 4.77759 1
 1 3 7 83.3893 4.47865 1
 -1 3 -7 88.8609 3.81551 3
 2 -3 7 464.382 9.94314 3
 -2 -3 -7 450.37 11.7117 1
 -2 -3 -7 455.515 8.83504 2
 2 -3 7 445.091 9.25844 1
 -2 3 -7 462.272 10.1045 3
 2 3 7 473.041 11.8028 1
 -3 -3 -7 143.363 6.6116 1
 3 -3 7 130.394 4.42211 1
 3 -3 7 134.829 5.50768 3
 -3 -3 -7 122.558 4.37663 2
 3 3 7 122.397 6.03035 1
 -3 3 -7 139.87 6.27232 3
 4 -3 7 389.449 9.8147 1
 -4 -3 -7 370.177 9.50727 2
 -4 -3 -7 379.352 10.7345 3
 -4 -3 -7 388.468 11.746 1
 4 -3 7 389.652 10.2296 3
 4 3 7 371.187 11.3366 1
 -4 3 -7 382.993 10.789 3
 5 -3 7 90.2545 6.2113 1
 5 -3 7 102.923 6.38736 3
 -5 -3 -7 78.5966 7.56486 3
 -5 -3 -7 81.1973 7.63028 1
 -5 -3 -7 82.2067 6.25974 2
 5 3 7 82.1464 6.51086 1
 -5 3 -7 78.3975 7.77496 3
 6 -3 7 166.903 8.66054 3
 -6 -3 -7 156.925 8.94022 2
 -6 -3 -7 158.392 10.2339 3
 -6 -3 -7 162.585 10.8368 1
 6 -3 7 162.705 9.15921 1
 6 3 7 173.228 9.18791 1
 -6 3 -7 155.331 10.4739 3
 -7 -3 -7 54.4121 7.78717 1
 -7 -3 -7 53.9687 7.29205 2
 -7 -3 -7 50.105 8.08839 3
 7 -3 7 57.6058 7.09527 1
 7 -3 7 56.6102 6.41458 3
 -7 3 -7 27.9553 7.88901 3
 7 3 7 59.6144 7.14378 1
 -8 -3 -7 29.5112 8.54973 2
 -8 -3 -7 7.22068 9.83083 3
 8 -3 7 27.6392 6.33052 3
 8 -3 7 18.2886 8.2229 1
 8 3 7 22.79 7.73939 1
 -8 3 -7 24.9103 9.47234 3
 -9 -4 7 13.0861 11.171 3
 9 -4 -7 12.0277 9.47372 3
 -9 -4 7 39.281 10.558 2
 9 -4 -7 17.5143 10.3605 1
 -9 4 7 12.4399 11.9648 3
 -9 4 7 4.35456 8.01729 2
 9 4 -7 -1.0414 7.15207 1
 8 -4 -7 8.54916 6.90927 1
 -8 -4 7 2.06274 6.9593 2
 -8 -4 7 14.1893 8.86412 3
 8 -4 -7 7.14772 7.18754 3
 8 4 -7 -12.467 5.58008 1
 -8 4 7 7.34699 8.9828 3
 -8 4 7 -4.297 6.17313 2
 -7 -4 7 1.11865 6.24118 3
 -7 -4 7 -0.2457 5.27957 2
 7 -4 -7 0.47432 5.18752 3
 7 4 -7 -11.231 4.09246 1
 6 -4 -7 30.0382 5.22114 3
 -6 -4 7 23.3186 5.0746 2
 -6 -4 7 25.9612 5.5099 3
 6 4 -7 20.4352 4.62648 1
 -4 -4 7 111.62 6.10732 2
 4 -4 -7 95.414 5.79741 3
 -4 -4 7 103.208 5.08531 3
 4 4 -7 96.3611 6.02867 1
 4 4 -7 106.142 6.84196 2
 -3 -4 7 160.49 6.50888 2
 3 -4 -7 163.739 6.1936 3
 -3 -4 7 162.827 5.05247 3
 3 4 -7 161.99 6.58986 1
 3 4 -7 161.866 7.18281 2
 -2 -4 7 502.466 12.2858 2
 2 4 -7 497.869 12.4544 2
 2 4 -7 516.145 12.0752 1
 1 -4 -7 38.6457 16.4668 4
 -1 -4 7 1.05308 2.06162 2
 0 -4 -7 6.74121 2.13235 1
 0 -4 7 8.71082 1.7962 3
 0 -4 -7 -2.3631 9.82315 4
 0 4 -7 3.84409 13.4039 4
 0 4 -7 2.45028 2.49374 2
 0 4 -7 6.3808 1.45446 1
 -1 -4 -7 0.16031 2.19923 1
 1 -4 7 1.28026 1.93589 3
 -1 -4 -7 30.0285 12.0441 4
 1 4 7 2.88004 2.06034 1
 -2 -4 -7 6.82798 2.68676 1
 2 -4 7 8.13954 2.49572 3
 -2 4 -7 5.59218 2.71455 3
 2 4 7 8.34513 2.2193 1
 3 -4 7 162.439 4.53043 1
 -3 -4 -7 162.269 4.61083 2
 -3 -4 -7 167.566 7.56942 1
 3 -4 7 167.699 6.45047 3
 -3 4 -7 167.052 7.0048 3
 3 4 7 168.966 7.0298 1
 -4 -4 -7 2.33241 3.80339 1
 4 -4 7 1.52571 2.32239 1
 4 -4 7 -1.3168 2.76504 3
 -4 -4 -7 6.27119 3.77293 3
 -4 -4 -7 0.55683 2.47378 2
 4 4 7 1.61897 2.4201 1
 -4 4 -7 2.94375 4.12268 3
 -5 -4 -7 112.454 8.8218 1
 -5 -4 -7 118.746 8.63675 3
 -5 -4 -7 112.271 6.30775 2
 5 -4 7 108.818 6.5225 1
 5 -4 7 112.337 7.1711 3
 5 4 7 121.158 7.32728 1
 -5 4 -7 109.958 8.77398 3
 -6 -4 -7 -4.7984 5.5509 3
 -6 -4 -7 4.68446 4.46668 2
 -6 -4 -7 5.42439 5.34146 1
 6 -4 7 5.98909 4.41698 3
 6 -4 7 3.03851 4.67047 1
 6 4 7 -0.027 4.21197 1
 -6 4 -7 -0.2949 5.93303 3
 -7 -4 -7 14.3848 6.03936 2
 7 -4 7 17.0614 6.31313 1
 -7 -4 -7 9.12519 7.66949 3
 -7 -4 -7 14.2837 7.12193 1
 7 -4 7 24.5154 5.60079 3
 7 4 7 -0.2594 4.92017 1
 -7 4 -7 4.33479 8.00067 3
 8 -4 7 7.06965 8.15753 1
 8 -4 7 13.3698 6.96898 3
 -8 -4 -7 5.85365 8.21183 2
 -8 -4 -7 -8.9207 8.45189 1
 -8 -4 -7 19.4682 10.6648 3
 8 4 7 -0.6385 7.66309 1
 -8 4 -7 6.87032 10.1291 3
 -8 -5 7 63.7232 9.98892 2
 8 -5 -7 71.6311 9.05335 3
 -8 -5 7 59.4129 9.90687 3
 8 5 -7 44.2676 7.74796 1
 -8 5 7 41.9915 8.19484 2
 7 -5 -7 -2.221 5.736 3
 -7 -5 7 11.3623 6.88433 3
 -7 -5 7 -2.6494 6.21532 2
 7 5 -7 -1.4995 5.23319 1
 6 -5 -7 88.8287 8.33857 3
 -6 -5 7 85.7057 8.55815 2
 -6 -5 7 94.3685 8.47138 3
 6 5 -7 73.3812 8.1299 1
 6 5 -7 100.296 8.83944 2
 -5 -5 7 142.637 7.27254 3
 5 -5 -7 154.92 8.05352 3
 -5 -5 7 158.734 8.42356 2
 5 5 -7 153.432 9.702 2
 5 5 -7 139.027 8.28069 1
 4 -5 -7 102.906 6.39899 3
 -4 -5 7 116.98 5.86379 3
 -4 -5 7 114.861 6.82293 2
 4 5 -7 103.518 6.79218 1
 4 5 -7 110.783 7.74166 2
 -3 -5 7 214.484 48.9206 4
 -3 -5 7 173.209 7.18666 2
 3 -5 -7 194.786 7.18935 3
 3 5 -7 184.084 8.12873 2
 3 5 -7 183.3 7.31278 1
 -2 -5 7 0.96611 2.23286 2
 2 5 -7 0.15504 2.75743 2
 2 5 -7 -3.1241 2.19867 1
 1 5 -7 312.807 8.04028 1
 1 5 -7 314.051 9.43393 2
 0 -5 7 26.2801 2.60278 3
 0 -5 -7 23.7904 3.06737 1
 0 -5 -7 20.6364 11.0796 4
 0 5 -7 23.6994 3.31324 2
 0 5 -7 19.6601 2.25884 1
 -1 -5 -7 311.192 9.45707 1
 1 -5 7 308.091 7.82965 3
 2 -5 7 256.466 7.64213 3
 -2 -5 -7 260.794 9.12041 1
 2 5 7 270.28 8.736 1
 3 -5 7 55.5465 5.61339 3
 -3 -5 -7 66.1265 6.32152 1
 -3 -5 -7 67.4265 3.2206 2
 -3 5 -7 66.9473 6.28429 3
 3 5 7 55.6498 5.40397 1
 -4 -5 -7 106.053 7.97506 1
 4 -5 7 93.254 4.31448 1
 -4 -5 -7 85.2464 4.65006 2
 4 -5 7 86.384 6.56464 3
 4 5 7 79.5198 6.47158 1
 -4 5 -7 93.0371 7.88626 3
 -5 -5 -7 129.245 9.39819 1
 -5 -5 -7 135.398 6.62204 2
 5 -5 7 132.822 7.98349 3
 -5 -5 -7 131.425 9.52584 3
 5 -5 7 140.72 6.65733 1
 5 5 7 137.847 8.08489 1
 -5 5 -7 147.034 10.1406 3
 -6 -5 -7 68.8515 7.61985 2
 -6 -5 -7 70.9562 7.85528 3
 6 -5 7 76.9264 7.78581 1
 -6 -5 -7 83.2391 9.72612 1
 6 -5 7 71.5117 6.74851 3
 -6 5 -7 75.0194 8.25491 3
 6 5 7 67.0861 7.52767 1
 -7 -5 -7 59.4644 9.40034 3
 7 -5 7 76.9502 7.66949 3
 7 -5 7 67.6695 7.55293 1
 -7 -5 -7 52.9091 8.97551 1
 -7 -5 -7 69.5985 7.37314 2
 7 5 7 49.4662 6.33487 1
 -7 5 -7 68.6852 10.4184 3
 -8 -5 -7 6.21664 11.407 3
 8 -5 7 4.08435 6.90169 3
 -8 -5 -7 -0.313 8.85329 1
 8 -5 7 2.61619 8.31815 1
 -8 -5 -7 0.34819 8.15541 2
 -8 5 -7 -11.175 10.6676 3
 8 5 7 4.89545 7.20999 1
 -8 -6 7 1.0862 8.89083 2
 -8 -6 7 12.7166 9.25316 3
 8 -6 -7 5.46047 8.82624 3
 8 6 -7 1.11894 7.29971 1
 -7 -6 7 97.7499 8.80351 3
 -7 -6 7 92.8495 9.20933 2
 7 -6 -7 94.1111 8.62868 3
 7 6 -7 88.7896 8.75632 1
 6 -6 -7 28.4036 5.5236 3
 -6 -6 7 24.0565 6.04467 2
 -6 -6 7 30.5092 5.81107 3
 6 6 -7 27.2805 5.92688 1
 6 6 -7 25.3605 7.71679 2
 5 -6 -7 49.5584 5.53614 3
 -5 -6 7 41.8631 5.10745 3
 -5 -6 7 42.5475 5.34839 2
 5 6 -7 43.3069 6.4226 2
 5 6 -7 42.7219 5.97465 1
 -4 -6 7 30.1191 4.58475 2
 4 -6 -7 37.8722 4.83525 3
 -4 -6 7 34.8614 4.21236 3
 4 6 -7 27.6489 4.6047 1
 4 6 -7 40.1923 5.37244 2
 3 -6 -7 133.226 6.99366 3
 -3 -6 7 138.303 7.04679 2
 3 6 -7 139.714 7.10097 1
 3 6 -7 128.022 8.03202 2
 -2 -6 7 165.572 6.94113 2
 2 6 -7 152.024 7.80275 2
 2 6 -7 152.004 6.58991 1
 1 -6 -7 41.5052 4.41871 1
 1 6 -7 41.2362 3.9275 1
 1 6 -7 36.7106 4.358 2
 0 -6 7 246.504 7.10778 3
 0 -6 -7 253.593 8.60412 1
 0 6 -7 243.888 6.24712 1
 0 6 -7 261.702 9.11471 2
 1 -6 7 278.85 7.9235 3
 -1 -6 -7 271.095 9.37469 1
 1 6 7 281.759 6.6145 2
 -2 -6 -7 -0.8252 3.31645 1
 2 -6 7 1.72777 3.1605 3
 -2 -6 -7 13.7589 18.5302 4
 2 6 7 1.38198 2.44866 1
 3 -6 7 72.2329 5.46175 3
 -3 -6 -7 88.2415 7.10587 1
 3 6 7 70.0376 5.85601 1
 4 -6 7 48.037 5.37388 3
 -4 -6 -7 42.3846 5.65825 1
 -4 -6 -7 43.0677 4.33019 2
 -4 6 -7 47.7562 5.83225 3
 4 6 7 42.0607 4.91882 1
 5 -6 7 118.953 6.05082 1
 -5 -6 -7 121.442 9.65872 1
 -5 -6 -7 103.61 6.42247 2
 5 -6 7 124.258 9.25905 3
 -5 -6 -7 122.959 10.1452 3
 5 6 7 132.921 8.54605 1
 -5 6 -7 119.427 10.6768 3
 -6 -6 -7 4.65779 4.70507 2
 6 -6 7 8.96325 4.74724 1
 -6 -6 -7 14.485 6.17068 1
 6 -6 7 -5.8613 5.09327 3
 -6 -6 -7 21.0566 7.45599 3
 6 6 7 0.51936 4.15005 1
 -6 6 -7 -2.1723 7.59177 3
 -7 -6 -7 -1.8052 6.02936 2
 -7 -6 -7 -7.8297 7.55408 1
 7 -6 7 0.46176 6.17894 1
 7 -6 7 -5.3462 6.55684 3
 -7 -6 -7 -0.5748 9.25352 3
 7 6 7 2.4548 5.36365 1
 -7 6 -7 -16.3 9.19001 3
 8 -7 -7 26.0086 9.5362 3
 -8 -7 7 37.848 11.2853 3
 -8 -7 7 30.75 10.7646 2
 8 7 -7 22.3044 8.91883 1
 7 -7 -7 -6.6278 6.91096 3
 -7 -7 7 1.49766 7.24501 2
 -7 -7 7 12.4766 8.12355 3
 7 7 -7 1.72493 7.63656 1
 6 -7 -7 55.9394 6.67075 3
 -6 -7 7 50.0507 7.38689 2
 -6 -7 7 51.7497 6.77012 3
 6 7 -7 48.0383 9.00347 2
 6 7 -7 38.4175 6.88743 1
 5 -7 -7 113.722 8.92373 3
 -5 -7 7 81.2723 9.15896 2
 -5 -7 7 89.9574 8.56458 3
 5 7 -7 88.4794 9.4626 1
 5 7 -7 84.0022 8.0795 2
 4 -7 -7 6.66768 4.14907 3
 -4 -7 7 7.90246 4.3912 2
 4 7 -7 9.26226 4.69647 1
 4 7 -7 6.05791 5.3553 2
 -3 -7 7 13.4625 3.93506 2
 3 -7 -7 14.093 3.94379 3
 3 7 -7 20.2548 5.24089 2
 3 7 -7 16.7332 3.93549 1
 2 -7 -7 29.7145 4.06641 1
 2 7 -7 29.052 4.73063 2
 2 7 -7 33.2363 4.06184 1
 1 -7 -7 53.7836 5.4877 1
 1 7 -7 61.3875 4.53371 1
 1 7 -7 66.7675 5.92055 2
 0 -7 -7 117.984 6.95092 1
 0 -7 7 115.269 6.07454 3
 0 -7 -7 147.726 21.8349 4
 0 7 -7 119.811 7.64623 2
 0 7 -7 118.381 4.43377 1
 1 -7 7 51.3146 4.47514 3
 -1 -7 -7 55.7347 5.39375 1
 -1 7 -7 49.9201 5.35338 2
 1 7 7 50.6357 4.12918 2
 -2 -7 -7 148.488 8.27969 1
 2 -7 7 154.289 7.55556 3
 2 7 7 157.867 5.03865 2
 2 7 7 159.345 7.57883 1
 3 -7 7 32.6937 4.94255 3
 -3 -7 -7 25.7756 5.22062 1
 3 7 7 18.1404 3.71133 1
 -4 -7 -7 24.9822 5.55572 1
 4 -7 7 7.85984 5.23995 3
 4 7 7 25.3595 4.75145 1
 -5 -7 -7 40.5538 7.13001 1
 -5 -7 -7 52.2907 4.73024 2
 5 -7 7 41.8663 6.41968 3
 5 7 7 40.3409 5.74085 1
 -6 -7 -7 8.01374 5.13208 2
 6 -7 7 7.25343 4.22985 1
 6 -7 7 17.815 6.46342 3
 -6 -7 -7 15.1985 8.42827 3
 -6 -7 -7 9.86618 6.72077 1
 6 7 7 19.824 5.71206 1
 -6 7 -7 4.09388 8.79588 3
 -7 -7 -7 10.0697 8.85145 1
 -7 -7 -7 12.5185 6.72343 2
 -7 -7 -7 11.525 11.1073 3
 7 -7 7 8.81146 7.69534 3
 7 -7 7 19.8416 6.49327 1
 7 7 7 16.8907 6.93758 1
 -7 7 -7 35.7629 11.0177 3
 7 -8 -7 19.4613 8.30963 3
 -7 -8 7 26.6405 9.60045 3
 -7 -8 7 23.1516 9.41024 2
 7 8 -7 31.4351 9.18005 1
 -6 -8 7 14.9649 7.1231 3
 -6 -8 7 32.93 7.54091 2
 6 -8 -7 22.4425 6.42549 3
 6 8 -7 16.8517 9.76665 2
 6 8 -7 12.3635 6.7741 1
 5 -8 -7 47.593 6.39479 3
 -5 -8 7 61.1928 7.39247 2
 -5 -8 7 57.2902 6.87531 3
 5 8 -7 46.7056 6.89034 1
 5 8 -7 47.8391 8.36645 2
 -4 -8 7 2.82882 4.94982 2
 4 -8 -7 13.4483 4.86129 3
 4 8 -7 7.64878 6.36877 2
 4 8 -7 11.9731 4.95499 1
 -3 -8 7 333.979 11.9183 2
 3 -8 -7 339.157 11.783 3
 3 8 -7 343.717 13.5017 2
 3 8 -7 336.12 11.5115 1
 2 -8 -7 12.6273 3.67888 1
 2 8 -7 1.94215 3.38777 1
 2 8 -7 9.92137 5.0521 2
 1 -8 -7 11.3079 3.91061 1
 1 8 -7 9.90464 4.76682 2
 1 8 -7 4.03515 2.94176 1
 0 -8 -7 194.657 9.3855 1
 0 -8 7 196.121 8.0255 3
 0 8 7 193.255 7.38708 2
 0 8 -7 191.912 9.9227 2
 -1 -8 -7 37.747 24.6119 4
 1 -8 7 75.9949 5.67553 3
 -1 -8 -7 63.5642 5.9655 1
 -1 8 -7 64.1276 6.0712 2
 1 8 7 75.2662 5.26459 2
 2 -8 7 7.76456 4.52998 3
 -2 -8 -7 3.08289 4.64873 1
 2 8 7 8.61868 3.02837 2
 2 8 7 4.23009 3.52587 1
 3 -8 7 184.86 9.48322 3
 -3 -8 -7 168.474 10.7545 1
 3 8 7 183.58 9.38995 1
 -4 -8 -7 1.10236 5.72897 1
 4 -8 7 1.09977 5.46242 3
 4 8 7 4.23778 4.14955 1
 5 -8 7 14.2628 6.48157 3
 -5 -8 -7 6.11099 6.80195 1
 5 8 7 5.04884 4.93117 1
 6 -8 7 20.841 7.96606 3
 -6 -8 -7 21.5861 7.87241 1
 -6 -8 -7 17.9652 5.83969 2
 -6 -8 -7 28.8061 10.1133 3
 6 8 7 11.9691 6.43643 1
 -7 -8 -7 -9.5207 10.2393 1
 7 -8 7 1.31738 4.84859 1
 -7 -8 -7 -12.148 12.4163 3
 7 -8 7 5.56054 8.63496 3
 -7 -8 -7 10.5759 7.43689 2
 7 8 7 11.5364 7.72705 1
 -6 -9 7 41.7658 9.12928 3
 6 -9 -7 58.5317 8.72635 3
 -6 -9 7 65.5733 9.80823 2
 6 9 -7 57.4269 8.90522 1
 6 9 -7 67.7447 12.341 2
 -5 -9 7 32.1842 7.58656 3
 -5 -9 7 22.3713 7.19678 2
 5 -9 -7 29.9062 6.86462 3
 5 9 -7 32.5775 7.26361 1
 5 9 -7 28.7413 8.99555 2
 4 -9 -7 75.0261 7.28906 3
 -4 -9 7 78.8117 7.84571 2
 4 9 -7 66.8751 8.95759 2
 4 9 -7 68.5373 7.31071 1
 3 -9 -7 21.1647 4.89715 1
 3 -9 -7 87.0901 41.5951 4
 3 -9 -7 28.238 5.64446 3
 3 9 -7 25.7059 6.99306 2
 3 9 -7 15.6144 4.90875 1
 2 -9 -7 31.5256 5.26921 1
 2 9 -7 16.8098 4.10676 1
 2 9 -7 28.5277 6.41013 2
 1 -9 -7 13.3606 4.86514 1
 1 9 -7 9.05925 3.12204 1
 1 9 -7 13.7595 5.74879 2
 0 -9 7 61.6288 5.81775 3
 0 -9 -7 51.6673 6.05393 1
 0 9 7 47.867 5.0549 2
 0 9 -7 50.666 6.78676 2
 -1 -9 -7 83.312 31.5187 4
 -1 -9 -7 118.178 9.7016 1
 1 -9 7 107.892 8.49843 3
 1 9 7 121.001 7.03791 2
 -1 9 -7 126.453 10.1614 2
 -2 -9 -7 43.2767 31.119 4
 2 -9 7 98.3577 7.51711 3
 -2 -9 -7 97.3081 9.97534 1
 2 9 7 73.8787 6.31008 2
 -3 -9 -7 36.2229 33.713 4
 -3 -9 -7 9.58759 6.4666 1
 3 -9 7 1.7985 5.63468 3
 3 9 7 6.94492 4.20102 1
 4 -9 7 34.2944 7.21492 3
 -4 -9 -7 40.0421 8.1364 1
 4 9 7 32.9988 5.97884 1
 5 -9 7 -6.0134 7.35296 3
 -5 -9 -7 9.41776 7.96904 1
 5 9 7 12.7211 5.74579 1
 6 -9 7 3.80656 9.77886 3
 -6 -9 -7 20.3868 8.99445 1
 -6 -9 -7 11.3207 11.9026 3
 6 9 7 12.3734 6.73679 1
 -5 -10 7 43.5561 9.08424 3
 -5 -10 7 34.4225 8.70915 2
 -5 -10 7 107.25 129.132 4
 5 -10 -7 21.3672 8.08596 3
 5 10 -7 32.775 10.7874 2
 5 10 -7 43.9713 8.41962 1
 4 -10 -7 67.9473 7.99996 3
 4 -10 -7 63.1182 7.32907 1
 4 10 -7 61.9585 7.92372 1
 4 10 -7 54.6125 10.1154 2
 3 -10 -7 19.152 5.955 3
 3 -10 -7 17.736 6.10632 1
 3 10 -7 9.93091 5.33365 1
 3 10 -7 16.3201 7.96025 2
 2 -10 -7 88.1984 9.8346 1
 2 10 -7 79.5326 7.90616 1
 2 10 -7 79.1865 8.73238 2
 1 -10 -7 19.5969 5.93808 1
 1 10 -7 11.5625 3.75484 1
 1 10 -7 17.0439 6.80999 2
 0 -10 7 68.258 6.72349 3
 0 -10 -7 58.3902 7.35746 1
 0 10 -7 55.306 7.77005 2
 0 10 7 56.0517 6.07251 2
 -1 -10 -7 8.53563 6.49188 1
 1 -10 7 4.85002 6.01269 3
 1 10 7 14.6411 4.90953 2
 -1 10 -7 11.8252 7.03241 2
 2 -10 7 37.1125 7.05802 3
 -2 -10 -7 46.0995 8.18694 1
 -2 -10 -7 35.5399 37.9519 4
 2 10 7 41.4172 5.24177 2
 -2 10 -7 35.5909 7.99552 2
 3 -10 7 236.668 13.1019 3
 -3 -10 -7 276.826 15.7042 1
 3 10 7 272.423 13.3941 1
 3 10 7 236.609 9.18678 2
 -4 -10 -7 33.2729 9.32719 1
 4 -10 7 18.7182 7.94045 3
 4 10 7 0.83671 6.40827 1
 5 -10 7 11.8376 9.69747 3
 -5 -10 -7 29.8188 10.4113 1
 5 10 7 23.6197 8.43504 1
 4 -11 -7 1.44085 7.46402 1
 4 -11 -7 5.18962 7.18064 3
 4 11 -7 -2.6174 10.7476 2
 4 11 -7 -6.3673 6.99974 1
 3 -11 -7 8.88124 6.38368 3
 3 -11 -7 6.55117 7.13962 1
 3 11 -7 -5.6233 5.88053 1
 3 11 -7 11.6464 9.6784 2
 2 -11 -7 36.8797 6.70327 3
 2 -11 -7 26.0536 7.39749 1
 2 11 -7 16.3995 5.27454 1
 2 11 -7 26.0096 9.14524 2
 -1 -11 7 7.28193 6.30715 3
 1 -11 -7 12.4153 6.95705 1
 1 11 -7 11.1364 7.85718 2
 -1 11 7 16.1791 6.45332 2
 0 -11 7 13.0728 6.52233 3
 0 -11 -7 13.7227 7.17464 1
 0 11 7 8.61114 5.89349 2
 0 11 -7 14.9048 8.32183 2
 1 -11 7 -8.3689 6.6218 3
 -1 -11 -7 4.13102 7.68673 1
 1 11 7 5.46068 5.80719 2
 -1 11 -7 -3.9517 7.83478 2
 -2 -11 -7 -1.7152 8.47491 1
 2 -11 7 -1.2159 7.66105 3
 -2 11 -7 3.06396 8.62054 2
 2 11 7 -4.0654 5.72238 2
 -3 -11 -7 8.826 10.38 1
 3 -11 7 8.79224 8.42722 3
 -3 11 -7 -3.6824 9.23597 2
 3 11 7 12.3717 5.37268 2
 4 -11 7 12.6947 9.99648 3
 -4 -11 -7 4.05276 11.0756 1
 4 11 7 3.78895 8.27131 1
 3 -12 -7 11.4629 8.32539 3
 3 -12 -7 29.7857 9.58358 1
 3 12 -7 9.39734 7.18407 1
 3 12 -7 15.5537 12.3275 2
 2 -12 -7 31.6104 9.51056 1
 2 -12 -7 2.46777 7.59684 3
 2 12 -7 18.464 6.01033 1
 2 12 -7 16.4876 10.9584 2
 -1 -12 7 35.4835 8.6192 3
 1 -12 -7 41.9336 9.1546 1
 1 12 -7 42.2639 11.0739 2
 -1 12 7 25.7834 8.46639 2
 0 -12 -7 76.4185 10.4982 1
 0 -12 7 54.4125 9.05556 3
 0 12 7 53.314 8.41226 2
 0 12 -7 78.6014 12.0403 2
 1 -12 7 54.5308 9.79827 3
 -1 -12 -7 45.0378 10.5938 1
 1 12 7 61.6471 8.14522 2
 -1 12 -7 47.4097 11.8358 2
 -2 -12 -7 14.306 11.1711 1
 2 -12 7 14.3615 9.87849 3
 2 12 7 8.76579 6.95372 2
 -2 12 -7 21.7465 11.7701 2
 9 0 -8 26.7118 8.06553 1
 -9 0 8 46.3042 10.6874 3
 -9 0 8 24.5484 9.4487 2
 9 0 -8 49.4768 9.07203 3
 -8 0 8 280.207 14.2033 3
 8 0 -8 285.324 12.7207 1
 8 0 -8 296.389 12.8444 3
 -8 0 8 303.258 14.2532 2
 -7 0 8 25.0973 5.34665 2
 7 0 -8 19.3977 4.97269 1
 -7 0 8 25.4045 6.00271 3
 7 0 -8 27.2071 4.84228 3
 6 0 -8 86.6609 7.05595 1
 -6 0 8 88.1063 7.2778 2
 -6 0 8 83.0862 7.74941 3
 6 0 -8 84.9475 6.13259 3
 -5 0 8 -0.8519 2.89068 2
 5 0 -8 -1.3579 2.48807 3
 -5 0 8 2.14776 3.33088 3
 -4 0 8 256.681 7.16062 3
 -4 0 8 251.146 8.34163 2
 4 0 -8 249.847 6.69002 3
 3 0 -8 337.352 7.33759 3
 -3 0 8 336.586 9.11462 2
 -3 0 8 346.612 7.62056 3
 3 0 -8 337.067 9.40799 2
 -2 0 8 1139.41 22.7272 2
 2 0 -8 1130.33 22.7535 2
 2 0 -8 1156.1 19.6855 3
 -1 0 8 672.156 13.9948 2
 1 0 -8 684.535 14.0284 2
 0 0 -8 211.223 5.52638 2
 0 0 8 208.256 5.53487 2
 -1 0 -8 230.883 5.51621 3
 -1 0 -8 229.287 5.88704 2
 -1 0 -8 225.134 6.17048 1
 -2 0 -8 547.342 11.3659 3
 -2 0 -8 555.564 12.5349 1
 2 0 8 564.546 12.5934 1
 -3 0 -8 -1.3008 2.43265 3
 3 0 8 4.5555 2.20862 1
 -3 0 -8 4.6158 2.35667 1
 4 0 8 44.2802 4.61711 1
 4 0 8 40.1297 3.54262 3
 -4 0 -8 52.8677 5.5412 1
 -4 0 -8 45.523 4.28497 3
 -5 0 -8 166.208 8.61603 1
 -5 0 -8 174.989 8.51828 3
 5 0 8 163.603 7.80105 1
 5 0 8 174.235 7.18088 3
 -6 0 -8 388.8 13.3369 3
 -6 0 -8 383.363 13.6607 1
 6 0 8 397.573 13.2889 1
 7 0 8 42.9419 7.01234 1
 -7 0 -8 55.5739 8.09951 3
 8 0 8 12.6751 8.03724 1
 -8 0 -8 29.1586 10.4139 3
 -9 0 -8 36.2833 10.9867 2
 -9 0 -8 33.7716 13.1559 3
 -9 -1 8 -6.5141 9.53397 3
 9 -1 -8 -9.331 7.28799 1
 9 -1 -8 1.85146 7.97657 3
 -9 -1 8 12.7722 8.23241 2
 -9 1 8 6.67226 10.234 3
 -9 1 8 1.09705 7.60613 2
 9 1 -8 3.72817 7.14595 1
 -8 -1 8 13.4625 7.66687 3
 -8 -1 8 3.41183 6.18353 2
 8 -1 -8 4.09435 5.90083 3
 8 -1 -8 0.05712 5.70515 1
 8 1 -8 -8.4083 5.65069 3
 -8 1 8 -2.0267 7.72731 3
 -8 1 8 -9.1275 5.8087 2
 8 1 -8 3.98295 4.95939 1
 -7 -1 8 7.18291 5.78847 3
 -7 -1 8 12.131 4.69172 2
 7 -1 -8 16.6649 4.80334 3
 7 -1 -8 1.75515 3.92464 1
 7 1 -8 5.39224 4.40698 3
 -7 1 8 -10.719 4.38736 2
 -7 1 8 10.4394 5.87319 3
 7 1 -8 16.9447 4.47295 1
 -6 -1 8 7.71952 4.40039 3
 6 -1 -8 3.27534 3.45259 3
 -6 -1 8 7.73992 4.21076 2
 -6 1 8 5.77857 4.10616 2
 6 1 -8 1.1821 3.2616 3
 6 1 -8 2.65222 3.15024 1
 -6 1 8 9.18612 4.66216 3
 5 -1 -8 13.1733 3.16692 3
 -5 -1 8 12.2588 3.6007 2
 -5 -1 8 12.7639 3.52017 3
 5 1 -8 13.0577 2.9333 3
 -5 1 8 17.2655 3.71526 2
 -5 1 8 10.1692 3.80552 3
 -4 -1 8 29.8156 3.75155 2
 -4 -1 8 28.7275 3.10478 3
 4 -1 -8 18.9716 2.95321 3
 4 1 -8 23.0647 3.61451 2
 -4 1 8 29.0358 3.37816 3
 -4 1 8 22.3601 3.37211 2
 4 1 -8 24.4826 2.59121 3
 -3 -1 8 0.95497 1.83211 3
 3 -1 -8 0.01886 1.85725 3
 -3 -1 8 0.747 2.39535 2
 3 1 -8 2.91149 2.77838 2
 -3 1 8 -0.5731 2.20161 2
 3 1 -8 -0.7665 1.41911 3
 2 -1 -8 220.351 5.3916 3
 2 -1 -8 231.398 6.69471 2
 -2 -1 8 219.423 6.67825 2
 2 1 -8 215.747 4.4389 3
 -2 1 8 221.519 6.51741 2
 -1 -1 8 30.0675 3.31795 2
 1 -1 -8 30.6516 2.94702 2
 -1 1 8 28.9467 2.34979 2
 0 -1 -8 18.4746 1.73651 2
 0 -1 8 16.3133 2.15742 2
 0 1 -8 15.6503 2.22029 2
 0 1 8 16.6612 1.64236 2
 0 1 -8 17.2691 1.78954 3
 1 -1 8 292.995 6.34862 3
 -1 -1 -8 287.533 6.40811 2
 -1 -1 -8 283.067 7.66911 1
 -1 1 -8 286.612 6.32956 3
 -1 1 -8 286.947 6.88657 1
 -2 -1 -8 144.195 5.13393 3
 2 -1 8 140.335 4.64602 3
 -2 -1 -8 131.729 5.47693 1
 2 -1 8 135.763 4.58478 1
 2 1 8 126.85 5.21871 1
 -2 1 -8 131.898 4.67899 1
 3 -1 8 207.236 6.39714 3
 -3 -1 -8 200.612 7.24147 1
 -3 -1 -8 204.917 6.83716 3
 3 -1 8 206.935 6.42377 1
 -3 1 -8 205.365 6.47423 1
 3 1 8 200.649 6.99502 1
 -3 1 -8 197.443 6.87381 3
 -4 -1 -8 84.3945 5.97801 3
 -4 -1 -8 84.0286 6.15603 1
 4 -1 8 84.5633 5.10138 1
 4 -1 8 78.8695 5.04875 3
 4 1 8 85.6298 5.49076 1
 -4 1 -8 81.4274 5.55972 1
 -4 1 -8 82.4706 6.25632 3
 -5 -1 -8 12.1031 4.29446 1
 -5 -1 -8 10.5932 4.64181 3
 5 -1 8 4.42328 3.4279 1
 5 -1 8 5.61108 3.24029 3
 -5 1 -8 6.38687 4.65242 3
 -5 1 -8 5.4795 3.72699 1
 5 1 8 3.46519 3.42984 1
 -6 -1 -8 9.55856 5.32175 1
 6 -1 8 16.9304 4.81181 1
 6 -1 8 18.7279 4.29513 3
 -6 -1 -8 8.36903 5.82282 3
 6 1 8 4.54872 4.64802 1
 -6 1 -8 17.1324 6.31456 3
 7 -1 8 7.1056 4.5678 3
 7 -1 8 6.91312 6.11735 1
 -7 -1 -8 8.39528 6.93087 3
 -7 1 -8 5.61537 7.47498 3
 7 1 8 -1.3269 5.65261 1
 8 -1 8 -8.0571 7.45083 1
 -8 -1 -8 -15.494 7.21987 2
 -8 -1 -8 11.0873 9.31929 3
 8 -1 8 -0.5885 5.51035 3
 -8 1 -8 12.2772 9.46121 3
 8 1 8 -2.1609 7.99429 1
 9 -2 -8 54.8354 8.97826 3
 9 -2 -8 62.3421 9.74161 1
 -9 -2 8 50.012 11.0773 3
 -9 -2 8 57.9125 10.5873 2
 -9 2 8 42.1412 11.6351 3
 -9 2 8 23.6377 8.74217 2
 9 2 -8 64.3549 8.03563 1
 -8 -2 8 111.046 9.52345 3
 -8 -2 8 113.87 11.8576 2
 8 -2 -8 108.599 8.55769 3
 8 -2 -8 104.828 10.9402 1
 -8 2 8 115.263 9.4817 2
 8 2 -8 110.585 9.40476 1
 -8 2 8 102.726 10.1585 3
 7 -2 -8 -8.0605 4.68831 3
 -7 -2 8 2.28699 4.83889 2
 -7 -2 8 3.08547 5.5156 3
 -7 2 8 3.92654 6.1948 3
 7 2 -8 -10.376 3.55028 1
 -7 2 8 -3.1928 4.50838 2
 -6 -2 8 350.323 11.8721 2
 6 -2 -8 357.207 10.5792 3
 -6 -2 8 351.055 10.7734 3
 -6 2 8 339.165 12.1014 2
 -6 2 8 351.454 11.5938 3
 6 2 -8 339.104 11.7935 1
 5 -2 -8 202.465 7.51983 3
 -5 -2 8 211.343 8.3559 2
 -5 -2 8 201.631 7.41592 3
 5 2 -8 202.011 6.52921 3
 5 2 -8 200.859 8.31337 1
 -5 2 8 201.481 8.21173 3
 -5 2 8 209.555 8.44933 2
 -4 -2 8 150.981 6.87083 2
 4 -2 -8 169.798 6.09395 3
 -4 -2 8 162.083 5.52315 3
 4 2 -8 159.399 7.56947 2
 -4 2 8 165.926 6.85341 2
 4 2 -8 170.169 6.99258 1
 -3 -2 8 6.87324 2.46387 2
 -3 -2 8 7.61416 2.00003 3
 3 -2 -8 9.38462 2.25677 3
 -3 2 8 0.99612 2.28861 2
 3 2 -8 0.94525 2.72441 2
 -2 -2 8 46.6391 24.1234 4
 2 2 -8 1.20976 2.43024 2
 -1 -2 8 776.526 16.251 2
 -1 2 8 771.678 15.3851 2
 1 2 -8 769.169 16.335 2
 0 -2 -8 161.06 3.89956 2
 0 -2 8 160.319 3.56554 3
 0 2 -8 149.065 3.57605 3
 0 2 8 149.826 3.85872 2
 0 2 -8 154.738 5.58685 2
 1 -2 8 92.1705 3.35963 3
 -1 -2 -8 76.6655 4.36774 1
 -1 2 -8 81.6162 2.94337 1
 -1 2 -8 87.7513 3.55696 3
 -2 -2 -8 240.947 7.55684 1
 2 -2 8 233.471 5.90545 1
 2 -2 8 235.928 6.24488 3
 2 2 8 227.593 7.34217 1
 -2 2 -8 244.662 6.48955 3
 -2 2 -8 230.245 5.83186 1
 -3 -2 -8 21.9972 3.10262 3
 3 -2 8 22.546 2.66291 3
 3 -2 8 19.8918 2.33682 1
 -3 -2 -8 25.1646 3.45068 1
 -3 2 -8 26.1783 3.66718 3
 3 2 8 21.2332 3.25027 1
 -3 2 -8 29.3191 3.37049 1
 4 -2 8 145.356 6.18401 3
 -4 -2 -8 147.784 7.24899 3
 -4 -2 -8 145.845 7.36679 1
 4 -2 8 138.779 5.81762 1
 4 2 8 132.033 6.50266 1
 -4 2 -8 142.346 7.22859 3
 -5 -2 -8 -2.2251 4.13633 3
 5 -2 8 2.78885 3.22409 1
 -5 -2 -8 3.4072 4.00564 1
 5 -2 8 4.9306 3.34366 3
 -5 2 -8 0.64224 4.56032 3
 5 2 8 -1.6149 2.95627 1
 -6 -2 -8 73.0415 7.30383 1
 -6 -2 -8 76.1543 7.0811 3
 6 -2 8 72.4136 7.978 1
 -6 -2 -8 63.676 6.05812 2
 6 -2 8 79.2206 7.16443 3
 6 2 8 72.2428 7.96367 1
 -6 2 -8 78.9205 7.56655 3
 -7 -2 -8 29.1637 7.42976 3
 -7 -2 -8 33.8438 6.37774 2
 7 -2 8 32.7486 5.93595 3
 -7 -2 -8 36.0022 7.75919 1
 7 -2 8 29.1961 6.67396 1
 -7 2 -8 21.2415 7.08976 3
 7 2 8 33.2463 6.28957 1
 -8 -2 -8 22.5878 9.92597 3
 -8 -2 -8 -1.0832 7.79456 2
 8 -2 8 -2.3417 5.66702 3
 8 -2 8 8.69122 8.01322 1
 -8 2 -8 1.74408 8.95804 3
 8 2 8 9.17263 8.04074 1
 -9 -3 8 25.0309 10.8669 3
 9 -3 -8 33.894 10.106 1
 -9 -3 8 17.1087 10.0479 2
 9 -3 -8 25.2855 8.97867 3
 9 3 -8 12.5192 7.18612 1
 -9 3 8 30.2087 11.7399 3
 -9 3 8 9.91043 8.10574 2
 8 -3 -8 -3.7532 6.63298 1
 -8 -3 8 7.31463 7.19717 2
 -8 -3 8 11.4449 7.9694 3
 8 -3 -8 6.61254 6.34597 3
 -8 3 8 -11.965 5.57805 2
 -8 3 8 3.04451 8.44758 3
 8 3 -8 7.45348 5.48271 1
 -7 -3 8 0.90207 5.94103 3
 -7 -3 8 -1.6353 4.93789 2
 7 -3 -8 9.8617 5.08937 3
 -7 3 8 8.34235 6.20171 3
 -7 3 8 0.57176 4.86509 2
 7 3 -8 -7.3208 4.1481 1
 -6 -3 8 8.72621 4.82887 3
 6 -3 -8 13.5396 4.23801 3
 -6 -3 8 3.04471 4.02864 2
 -6 3 8 -5.849 3.78858 2
 6 3 -8 6.76446 3.69581 1
 -6 3 8 2.40019 4.96976 3
 -5 -3 8 10.7317 3.76298 3
 5 -3 -8 16.6147 3.80902 3
 -5 -3 8 13.8948 3.72481 2
 -5 3 8 14.504 3.87695 2
 5 3 -8 13.5944 3.66818 1
 5 3 -8 17.7395 4.39233 2
 4 -3 -8 92.4944 5.40853 3
 -4 -3 8 105.255 6.00497 2
 -4 -3 8 89.4053 4.75903 3
 4 3 -8 88.2636 5.871 1
 4 3 -8 100.298 6.7867 2
 -3 -3 8 508.245 9.75854 3
 -3 -3 8 500.545 12.4505 2
 3 -3 -8 499.314 11.0971 3
 3 3 -8 505.302 12.6045 1
 3 3 -8 496.143 12.5863 2
 -2 -3 8 190.367 4.13369 3
 -2 -3 8 188.534 6.54224 2
 2 3 -8 195.656 6.28718 1
 2 3 -8 190.382 6.95252 2
 -1 -3 8 84.4371 2.36547 3
 -1 -3 8 92.9638 4.63823 2
 -1 3 8 83.6969 3.62907 2
 1 3 -8 91.7504 5.05439 2
 0 -3 -8 292.511 8.24464 1
 0 -3 8 296.688 6.08626 3
 0 3 8 299.755 6.15765 2
 0 3 -8 287.873 8.29399 2
 1 -3 8 103.521 3.90303 3
 -1 -3 -8 94.4712 5.04676 1
 -1 3 -8 110.115 4.11274 3
 -2 -3 -8 44.1184 4.62054 1
 2 -3 8 35.2982 3.47959 3
 -2 3 -8 18.8024 12.098 4
 -2 3 -8 31.2679 3.08848 3
 2 3 8 36.7557 4.07553 1
 3 -3 8 117.133 4.27593 1
 -3 -3 -8 110.739 6.41688 1
 -3 -3 -8 110.668 4.06109 2
 3 -3 8 117.491 5.27873 3
 3 3 8 124.765 6.02983 1
 -3 3 -8 114.82 6.08969 3
 -4 -3 -8 66.9857 6.4875 3
 4 -3 8 54.2464 5.2296 3
 4 -3 8 59.4875 4.37777 1
 -4 -3 -8 46.2787 4.50707 2
 -4 -3 -8 62.3739 6.41033 1
 -4 3 -8 58.1234 4.99835 3
 4 3 8 64.0123 5.43685 1
 -5 -3 -8 0.32069 4.1475 1
 5 -3 8 4.19314 3.35024 3
 -5 -3 -8 -3.2654 3.29952 2
 -5 -3 -8 -0.7449 4.33073 3
 5 -3 8 5.05668 3.36655 1
 5 3 8 -2.0452 3.22989 1
 -5 3 -8 3.49352 4.79847 3
 -6 -3 -8 -3.8188 5.59015 3
 -6 -3 -8 -1.8653 4.45984 2
 6 -3 8 1.6395 3.88755 3
 -6 -3 -8 2.80978 5.46425 1
 6 -3 8 3.52776 4.55372 1
 -6 3 -8 0.27941 5.94628 3
 6 3 8 -5.7237 4.06723 1
 -7 -3 -8 7.19224 7.075 1
 -7 -3 -8 20.5862 7.67042 3
 7 -3 8 7.80562 5.96469 1
 -7 -3 -8 4.79095 6.19622 2
 7 -3 8 13.8163 5.09942 3
 -7 3 -8 1.89741 7.53289 3
 7 3 8 10.8057 6.14854 1
 -8 -3 -8 3.09364 8.11215 2
 -8 -3 -8 -8.5652 9.57154 3
 8 -3 8 -1.6301 6.00399 3
 8 -3 8 6.35407 7.97531 1
 -8 3 -8 0.25419 9.61002 3
 8 3 8 -12.457 7.57189 1
 9 -4 -8 0.15174 9.35901 1
 -9 -4 8 11.6421 11.2009 3
 9 -4 -8 16.645 9.48354 3
 -9 -4 8 1.83317 10.2195 2
 9 4 -8 -19.089 7.06748 1
 -9 4 8 -8.5349 7.66967 2
 8 -4 -8 73.0194 8.41934 3
 -8 -4 8 65.6154 9.35149 3
 -8 -4 8 61.3046 8.8403 2
 8 4 -8 46.6551 7.0348 1
 -8 4 8 65.259 8.47672 2
 -7 -4 8 38.9596 7.06521 3
 7 -4 -8 27.6183 6.05415 3
 -7 -4 8 30.0378 6.48078 2
 -7 4 8 18.6172 6.05261 2
 7 4 -8 21.6469 5.00498 1
 6 -4 -8 222.407 9.5035 3
 -6 -4 8 201.962 9.37092 3
 -6 -4 8 186.413 10.0925 2
 6 4 -8 218.38 9.91915 1
 -5 -4 8 124.52 7.5297 2
 -5 -4 8 121.196 6.67502 3
 5 -4 -8 118.071 7.06459 3
 5 4 -8 125.446 7.43447 1
 5 4 -8 127.501 8.90913 2
 -4 -4 8 403.682 9.35163 3
 4 -4 -8 412.248 10.6622 3
 -4 -4 8 422.483 11.7393 2
 4 4 -8 406.138 12.0276 2
 4 4 -8 409.46 11.8131 1
 -3 -4 8 382.568 47.4207 4
 -3 -4 8 398.313 10.838 2
 3 -4 -8 400.88 9.94002 3
 -3 -4 8 394.887 8.30203 3
 3 4 -8 379.143 11.1444 2
 3 4 -8 396.572 10.7946 1
 -2 -4 8 1.01662 2.20718 2
 2 4 -8 2.32879 2.76884 2
 2 4 -8 2.08728 2.1502 1
 -1 -4 8 56.2076 4.23161 2
 1 4 -8 52.9013 4.81305 2
 1 4 -8 50.0658 3.48006 1
 0 -4 -8 0.84198 1.86575 1
 0 -4 -8 -3.0973 10.4219 4
 0 -4 8 0.45571 1.60068 3
 0 4 -8 -0.1229 2.35847 2
 0 4 -8 1.40606 1.31236 1
 1 -4 8 609.025 12.1801 3
 -1 -4 -8 623.451 14.8652 1
 -1 4 -8 611.719 12.21 3
 2 -4 8 59.2165 4.4191 3
 -2 -4 -8 60.3356 5.28311 1
 2 4 8 63.8979 4.52634 1
 -2 4 -8 57.2442 4.74338 3
 -3 -4 -8 -1.1548 2.98784 1
 3 -4 8 4.65463 1.43762 1
 -3 -4 -8 4.10617 1.52893 2
 3 -4 8 4.39807 2.85138 3
 -3 4 -8 5.29714 3.43445 3
 3 4 8 4.72403 2.46001 1
 -4 -4 -8 181.333 8.39204 3
 -4 -4 -8 184.417 5.95209 2
 -4 -4 -8 180.743 8.65556 1
 4 -4 8 177.063 7.45303 3
 4 -4 8 182.784 5.9839 1
 4 4 8 180.103 8.06958 1
 -4 4 -8 186.569 8.51329 3
 -5 -4 -8 70.3329 6.83281 3
 5 -4 8 58.3913 5.22514 3
 5 -4 8 63.4344 5.64299 1
 -5 -4 -8 64.9519 5.87339 2
 -5 -4 -8 67.3976 6.72823 1
 5 4 8 58.5053 6.30805 1
 -5 4 -8 67.6697 6.75491 3
 6 -4 8 37.8971 5.30315 1
 -6 -4 -8 41.3799 5.2133 2
 6 -4 8 25.6943 4.98972 3
 -6 -4 -8 35.2337 6.45818 1
 -6 -4 -8 20.7778 6.42914 3
 -6 4 -8 39.1576 7.14717 3
 6 4 8 31.341 4.961 1
 7 -4 8 107.328 10.9565 1
 -7 -4 -8 114.442 10.456 1
 -7 -4 -8 90.8879 9.67849 3
 -7 -4 -8 120.992 10.7184 2
 7 -4 8 100.92 9.43049 3
 7 4 8 103.706 10.4341 1
 -7 4 -8 110.443 10.4044 3
 -8 -4 -8 34.4698 11.1796 3
 8 -4 8 31.8588 7.92186 3
 -8 -4 -8 11.4203 9.60391 1
 8 -4 8 15.7478 8.56588 1
 -8 -4 -8 28.447 8.48425 2
 8 4 8 21.4823 8.46731 1
 -8 4 -8 5.03346 10.4734 3
 -8 -5 8 21.3953 9.4064 3
 -8 -5 8 30.8476 8.83053 2
 8 -5 -8 15.4459 7.99083 3
 8 5 -8 16.8401 6.9152 1
 -8 5 8 -2.4685 6.83538 2
 -7 -5 8 195.88 12.4316 2
 -7 -5 8 207.045 11.8469 3
 7 -5 -8 189.201 11.4502 3
 7 5 -8 195.049 11.2743 1
 -6 -5 8 63.0696 6.49988 2
 -6 -5 8 70.4941 6.32189 3
 6 -5 -8 72.8208 6.64101 3
 6 5 -8 59.4056 6.27588 1
 6 5 -8 69.8312 7.79103 2
 -5 -5 8 37.4637 5.00479 2
 -5 -5 8 44.1646 4.50931 3
 5 -5 -8 35.7352 4.86724 3
 5 5 -8 40.6667 5.16735 1
 5 5 -8 38.9508 5.77126 2
 -4 -5 8 6.24824 52.888 4
 -4 -5 8 53.2415 5.09244 3
 -4 -5 8 55.732 5.84359 2
 4 -5 -8 55.2934 4.75985 3
 4 5 -8 62.4664 5.92585 2
 4 5 -8 53.3002 6.07468 1
 -2 -5 8 213.68 7.59859 2
 2 5 -8 213.555 8.24752 2
 2 5 -8 229.817 7.3337 1
 1 5 -8 35.8921 3.46305 1
 1 5 -8 31.8656 3.57924 2
 0 -5 8 159.755 5.05532 3
 0 -5 -8 164.148 6.51483 1
 0 5 -8 161.818 4.40269 1
 0 5 -8 165.511 7.32946 2
 -1 -5 -8 217.877 18.9506 4
 1 -5 8 181.422 5.98266 3
 -1 -5 -8 173.928 7.32408 1
 -2 -5 -8 18.5016 15.3991 4
 2 -5 8 25.8592 3.41305 3
 -2 -5 -8 31.8653 4.17585 1
 -2 5 -8 27.2108 3.65327 3
 2 5 8 32.8171 3.66245 1
 -3 -5 -8 93.7341 6.96687 1
 3 -5 8 102.377 6.28932 3
 3 5 8 97.0004 6.22475 1
 -3 5 -8 89.087 6.94724 3
 4 -5 8 7.73933 2.22115 1
 -4 -5 -8 8.6646 4.32152 1
 4 -5 8 7.62777 3.79932 3
 -4 -5 -8 7.00392 2.40824 2
 4 5 8 -2.0354 3.22609 1
 -4 5 -8 6.78853 4.57932 3
 -5 -5 -8 126.009 9.73647 3
 -5 -5 -8 106.597 9.08068 1
 -5 -5 -8 119.742 6.34286 2
 5 -5 8 123.289 6.153 1
 5 -5 8 113.2 8.09946 3
 5 5 8 115.062 7.77386 1
 -5 5 -8 136.184 10.1066 3
 -6 -5 -8 5.7313 6.78164 3
 6 -5 8 3.10084 4.4194 1
 -6 -5 -8 4.26169 4.63801 2
 6 -5 8 4.46005 5.23877 3
 -6 -5 -8 2.59418 5.64331 1
 -6 5 -8 7.0265 7.21169 3
 6 5 8 0.08296 4.01398 1
 -7 -5 -8 13.9164 8.22106 3
 -7 -5 -8 12.8278 6.36384 2
 7 -5 8 9.10328 6.34983 1
 -7 -5 -8 13.1004 7.69318 1
 7 -5 8 18.2955 6.24933 3
 -7 5 -8 24.1734 9.25241 3
 7 5 8 13.6874 5.4781 1
 -8 -5 -8 7.12538 9.46588 1
 -8 -5 -8 7.21644 11.9907 3
 8 -5 8 0.9265 7.25989 3
 8 -5 8 9.49481 8.0902 1
 -8 -5 -8 -1.8534 8.27159 2
 -8 5 -8 -13.827 11.8435 3
 8 5 8 -6.1028 7.37699 1
 -8 -6 8 61.3057 10.4991 2
 -8 -6 8 56.5236 10.352 3
 8 -6 -8 55.4762 9.48588 3
 8 6 -8 80.6445 9.69164 1
 -8 6 8 50.9241 9.03927 2
 7 -6 -8 -7.3361 6.48119 3
 -7 -6 8 -5.478 6.99109 3
 -7 -6 8 -9.3956 6.46738 2
 7 6 -8 -4.2002 6.13657 1
 -6 -6 8 36.3786 6.00823 3
 6 -6 -8 43.3413 6.28144 3
 -6 -6 8 39.1026 6.17449 2
 6 6 -8 43.6354 7.87883 2
 6 6 -8 34.4653 6.08318 1
 -5 -6 8 172.406 71.4666 4
 -4 -6 8 148.184 7.99398 2
 -4 -6 8 94.3169 63.2953 4
 -4 -6 8 138.432 6.71581 3
 4 -6 -8 136.279 7.64577 3
 4 6 -8 146.443 8.11637 1
 4 6 -8 135.792 8.86296 2
 -3 -6 8 450.582 12.7161 2
 3 -6 -8 457.544 12.0962 3
 3 6 -8 449.646 12.6761 1
 3 6 -8 456.488 13.527 2
 -2 -6 8 3.71068 2.79352 2
 2 6 -8 1.48838 3.35596 2
 2 6 -8 0.46196 2.74833 1
 1 -6 -8 207.776 7.70708 1
 1 6 -8 215.443 6.67479 1
 1 6 -8 219.403 8.57622 2
 0 -6 -8 83.181 5.61091 1
 0 -6 8 86.138 4.60744 3
 0 6 -8 74.5362 3.25298 1
 0 6 -8 78.1168 6.48223 2
 1 -6 8 48.7714 4.74165 3
 -1 -6 -8 61.5062 5.68771 1
 -1 6 -8 49.7654 4.81882 2
 -2 -6 -8 44.3349 4.80521 1
 2 -6 8 59.447 4.71173 3
 2 6 8 50.2379 4.97226 1
 -3 -6 -8 73.8163 7.1281 1
 3 -6 8 69.1208 6.40323 3
 3 6 8 78.1763 6.00434 1
 -4 -6 -8 15.8957 4.88332 1
 4 -6 8 16.1632 4.59867 3
 -4 -6 -8 26.3885 2.79177 2
 -4 6 -8 16.812 5.38798 3
 4 6 8 19.3046 3.86222 1
 -5 -6 -8 56.89 5.78494 2
 -5 -6 -8 65.068 7.25663 3
 5 -6 8 70.5648 6.40659 3
 5 -6 8 58.2049 4.79243 1
 -5 -6 -8 57.6133 7.01894 1
 -5 6 -8 71.6816 8.01756 3
 5 6 8 68.5736 6.5864 1
 6 -6 8 23.0043 6.07215 3
 -6 -6 -8 32.1247 8.1988 3
 -6 -6 -8 23.232 5.03489 2
 6 -6 8 20.0912 4.37847 1
 -6 -6 -8 30.7965 6.91256 1
 -6 6 -8 20.7096 8.43166 3
 6 6 8 12.4236 5.29741 1
 -7 -6 -8 75.2762 7.4363 2
 7 -6 8 68.9002 6.90798 1
 -7 -6 -8 66.1972 10.6508 3
 -7 -6 -8 90.4824 10.1229 1
 7 -6 8 71.0782 8.76563 3
 7 6 8 58.5231 7.38821 1
 -7 6 -8 77.9621 11.83 3
 7 -7 -8 43.908 8.24061 3
 -7 -7 8 41.6486 8.60541 2
 -7 -7 8 57.6399 8.72064 3
 7 7 -8 56.1554 9.11027 1
 -6 -7 8 4.48422 6.14008 2
 6 -7 -8 -1.1638 5.36773 3
 -6 -7 8 0.04444 5.88803 3
 6 7 -8 -0.8001 5.69439 1
 6 7 -8 5.31506 8.108 2
 5 -7 -8 97.7592 8.82643 3
 -5 -7 8 240.279 88.8749 4
 -5 -7 8 85.6102 7.404 2
 -5 -7 8 93.8004 6.50389 3
 5 7 -8 77.9714 8.04287 2
 5 7 -8 83.639 8.93762 1
 4 -7 -8 133.879 8.29799 3
 -4 -7 8 132.171 8.63573 2
 4 7 -8 137.997 9.0889 1
 4 7 -8 130.848 9.9546 2
 3 -7 -8 145.329 7.77746 3
 -3 -7 8 135.037 8.07406 2
 3 7 -8 136.442 7.78113 1
 3 7 -8 147.983 9.80164 2
 2 7 -8 24.0576 4.58174 2
 2 7 -8 24.7054 3.75901 1
 1 -7 -8 175.773 7.86797 1
 1 7 -8 187.455 9.06838 2
 1 7 -8 166.458 6.41128 1
 0 -7 8 297.021 8.61201 3
 0 -7 -8 315.011 10.4556 1
 0 7 -8 301.522 7.43611 1
 0 7 -8 320.427 11.0373 2
 -1 -7 -8 11.5223 20.496 4
 -1 -7 -8 19.9565 4.33517 1
 1 -7 8 23.2624 3.78521 3
 -1 7 -8 20.343 4.65543 2
 1 7 8 26.1961 2.65215 2
 -2 -7 -8 72.9721 6.39288 1
 -2 -7 -8 124.422 28.05 4
 2 -7 8 64.9462 6.60996 3
 2 7 8 76.57 6.19512 1
 3 -7 8 109.084 7.98974 3
 -3 -7 -8 66.9262 25.0058 4
 -3 -7 -8 105.184 8.38048 1
 3 7 8 112.074 6.88183 1
 4 -7 8 -4.4187 4.94738 3
 -4 -7 -8 -1.5543 4.89726 1
 5 -7 8 45.4028 7.04421 3
 -5 -7 -8 55.0456 7.16473 1
 -5 -7 -8 55.0069 4.6387 2
 5 7 8 33.6604 5.40752 1
 -6 -7 -8 15.8933 7.60578 1
 6 -7 8 8.20583 3.49163 1
 -6 -7 -8 8.78154 5.15912 2
 -6 -7 -8 12.4621 8.76899 3
 6 -7 8 11.2179 6.66717 3
 6 7 8 13.872 5.66788 1
 -6 7 -8 12.8427 8.93737 3
 -7 -7 -8 -7.7567 10.9837 3
 7 -7 8 1.06937 8.19354 3
 -7 -7 -8 7.83145 6.64308 2
 7 -7 8 6.92182 5.39385 1
 -7 -7 -8 4.62019 9.30644 1
 7 7 8 -14.393 6.70127 1
 -7 7 -8 11.4855 11.6937 3
 -7 -8 8 4.80567 9.15313 2
 7 -8 -8 8.04908 8.1253 3
 -7 -8 8 20.8269 9.33189 3
 7 8 -8 33.0492 9.20146 1
 7 8 -8 32.1344 13.1456 2
 -6 -8 8 86.9392 8.13406 3
 6 -8 -8 99.4381 8.90409 3
 -6 -8 8 97.39 9.48475 2
 6 8 -8 98.1598 11.5504 2
 6 8 -8 92.2172 9.32913 1
 5 -8 -8 66.8556 7.35759 3
 -5 -8 8 65.7962 6.7361 3
 -5 -8 8 57.654 7.19508 2
 5 8 -8 60.6226 7.52577 1
 5 8 -8 52.8068 8.76416 2
 -4 -8 8 323.801 13.1029 2
 -4 -8 8 184.943 92.4041 4
 4 -8 -8 320.274 11.7661 3
 4 8 -8 299.53 14.625 2
 4 8 -8 363.974 13.0997 1
 -3 -8 8 19.6726 4.92043 2
 3 -8 -8 17.9645 4.47683 3
 3 8 -8 17.1579 4.47168 1
 3 8 -8 15.77 5.90054 2
 2 -8 -8 156.928 8.26181 1
 2 8 -8 157.883 10.1643 2
 2 8 -8 153.632 7.61289 1
 1 -8 -8 76.9123 6.89451 1
 1 8 -8 57.0521 4.96855 1
 1 8 -8 83.358 8.56309 2
 0 -8 8 48.4277 4.6663 3
 0 -8 -8 43.7587 5.22001 1
 0 8 8 43.7974 4.01065 2
 0 8 -8 58.0079 6.39787 2
 -1 -8 -8 22.0278 24.989 4
 1 -8 8 8.97232 4.08439 3
 -1 -8 -8 4.20562 4.19325 1
 1 8 8 8.18474 2.9698 2
 -1 8 -8 0.27223 4.56907 2
 2 -8 8 105.996 7.99146 3
 -2 -8 -8 97.3591 8.82661 1
 -3 -8 -8 8.68814 5.2531 1
 3 -8 8 3.84594 4.96413 3
 3 8 8 8.70095 3.89523 1
 -4 -8 -8 102.023 10.8402 1
 4 -8 8 99.578 8.10005 3
 4 8 8 122.205 8.49419 1
 -5 -8 -8 -10.432 6.35849 1
 5 -8 8 -6.0639 6.57244 3
 5 8 8 -9.7167 4.52113 1
 -6 -8 -8 26.3197 5.79245 2
 6 -8 8 33.5472 7.98871 3
 -6 -8 -8 34.4198 8.43366 1
 -6 -8 -8 23.5503 10.4809 3
 6 8 8 30.16 6.43224 1
 6 -9 -8 9.64522 7.42038 3
 -6 -9 8 8.07797 8.42305 2
 -6 -9 8 2.56871 8.26995 3
 6 9 -8 4.62798 8.0692 1
 6 9 -8 11.9084 10.8318 2
 5 -9 -8 124.816 11.2157 3
 -5 -9 8 113.38 8.81937 3
 -5 -9 8 108.564 9.87931 2
 5 9 -8 105.436 12.1043 1
 5 9 -8 104.341 11.1483 2
 -4 -9 8 150.905 11.7973 2
 4 -9 -8 155.4 10.055 3
 4 9 -8 141.259 10.5241 1
 4 9 -8 144.912 13.9039 2
 3 -9 -8 75.8988 6.6743 1
 3 -9 -8 72.0787 7.1358 3
 3 9 -8 77.2419 8.12877 1
 3 9 -8 65.4722 8.17686 2
 2 -9 -8 106.153 8.63233 1
 2 9 -8 106.983 11.0444 2
 2 9 -8 102.234 7.35723 1
 1 -9 -8 50.8879 5.95725 1
 1 9 -8 47.0158 5.32376 1
 1 9 -8 43.4564 6.64492 2
 0 -9 -8 16.5287 5.20353 1
 0 -9 -8 -12.073 28.0523 4
 0 -9 8 25.065 4.8342 3
 0 9 -8 21.9364 6.22694 2
 0 9 8 23.9255 4.2935 2
 1 -9 8 6.97668 4.73255 3
 -1 -9 -8 7.60554 5.10761 1
 -1 -9 -8 66.4039 31.9631 4
 -1 9 -8 13.3921 5.49551 2
 1 9 8 11.4802 3.79289 2
 -2 -9 -8 30.5941 6.34438 1
 2 -9 8 44.7704 5.912 3
 -2 -9 -8 11.7515 30.7895 4
 2 9 8 31.2043 3.61031 2
 -2 9 -8 30.9987 6.89056 2
 3 -9 8 180.656 10.8873 3
 -3 -9 -8 194.386 12.8814 1
 -3 -9 -8 155.752 39.7371 4
 3 9 8 201.316 10.9352 1
 4 -9 8 -6.3888 6.80121 3
 -4 -9 -8 -1.5772 6.95444 1
 4 9 8 0.74545 4.75057 1
 5 -9 8 62.3121 9.06866 3
 -5 -9 -8 42.1539 9.13102 1
 5 9 8 58.6746 7.44526 1
 -6 -9 -8 11.6003 12.3306 3
 -6 -9 -8 25.7074 9.85796 1
 6 -9 8 31.3314 10.6736 3
 6 9 8 11.9165 7.55418 1
 -5 -10 8 149.244 127.386 4
 -5 -10 8 27.1716 8.69033 3
 -5 -10 8 12.3075 8.33667 2
 5 -10 -8 24.0622 7.99103 3
 5 10 -8 20.0428 11.0791 2
 5 10 -8 16.8794 7.77993 1
 4 -10 -8 25.8235 6.54658 1
 4 -10 -8 12.8016 50.8352 4
 4 -10 -8 29.2356 6.82564 3
 4 10 -8 27.6193 9.99866 2
 4 10 -8 18.2041 6.32426 1
 3 -10 -8 0.28642 5.61176 3
 3 -10 -8 15.5737 6.12974 1
 3 10 -8 3.98849 5.00778 1
 3 10 -8 19.8868 8.31017 2
 2 -10 -8 4.18381 5.72502 1
 2 10 -8 1.97594 4.28862 1
 2 10 -8 11.4013 7.45672 2
 -1 -10 8 -10.105 4.99289 3
 1 -10 -8 -0.1083 5.55673 1
 1 10 -8 2.57463 6.80779 2
 1 10 -8 4.26356 3.48613 1
 0 -10 8 51.0524 6.39999 3
 0 -10 -8 43.0699 7.0347 1
 0 -10 -8 35.0072 35.941 4
 0 10 -8 46.7207 7.78788 2
 0 10 8 37.849 5.57048 2
 1 -10 8 190.568 11.0007 3
 -1 -10 -8 167.583 12.5415 1
 -1 10 -8 188.063 13.9777 2
 1 10 8 198.79 8.84569 2
 -2 -10 -8 54.0503 8.48356 1
 2 -10 8 50.0122 7.32687 3
 -2 -10 -8 40.1975 40.2854 4
 -2 10 -8 29.1242 7.51066 2
 2 10 8 39.4406 4.57171 2
 -3 -10 -8 2.19982 7.67925 1
 3 -10 8 2.59033 6.77233 3
 4 -10 8 17.1027 8.15775 3
 -4 -10 -8 26.6084 9.5494 1
 4 10 8 18.3886 6.54837 1
 -5 -10 -8 1.63472 10.23 1
 5 -10 8 1.12383 9.58225 3
 5 10 8 4.70815 7.65509 1
 4 -11 -8 52.1229 8.96035 1
 4 -11 -8 67.2627 9.0928 3
 4 11 -8 63.7589 12.4074 2
 4 11 -8 47.4533 8.43199 1
 3 -11 -8 42.7115 7.2592 3
 3 -11 -8 61.599 8.87636 1
 3 11 -8 42.1698 7.11678 1
 3 11 -8 46.8158 10.9116 2
 2 -11 -8 80.5343 8.65687 1
 2 11 -8 68.6995 6.74882 1
 2 11 -8 66.8171 10.2842 2
 1 -11 -8 11.4692 7.14198 1
 -1 -11 8 2.40776 6.61987 3
 -1 11 8 1.98455 6.22879 2
 1 11 -8 9.41042 8.60329 2
 0 -11 -8 119.31 12.893 1
 0 -11 8 93.9882 8.22665 3
 0 11 -8 115.506 11.1369 2
 0 11 8 102.343 10.2962 2
 -1 -11 -8 53.1051 47.2254 4
 1 -11 8 44.5842 7.95042 3
 -1 -11 -8 21.0551 8.2303 1
 -1 11 -8 33.3552 9.56639 2
 1 11 8 41.6843 6.30311 2
 -2 -11 -8 2.57831 47.573 4
 2 -11 8 8.95389 8.22675 3
 -2 -11 -8 16.5874 8.99113 1
 -2 11 -8 20.1047 9.43557 2
 2 11 8 -1.791 5.01792 2
 -3 -11 -8 -44.76 49.0054 4
 -3 -11 -8 23.888 9.88092 1
 3 -11 8 17.6881 8.84522 3
 -3 11 -8 16.3394 10.3539 2
 4 -11 8 4.6134 9.93217 3
 -4 -11 -8 15.259 12.0828 1
 4 11 8 12.2555 8.2703 1
 3 -12 -8 18.9637 9.47766 1
 3 12 -8 8.34429 12.3532 2
 3 12 -8 10.3164 7.12352 1
 2 -12 -8 3.93673 8.48899 1
 2 -12 -8 -0.9911 7.18955 3
 2 12 -8 -4.9853 11.0901 2
 2 12 -8 7.20486 5.68528 1
 1 -12 -8 22.6332 9.03183 1
 -1 -12 8 25.0098 8.8971 3
 -1 12 8 13.7335 8.18982 2
 1 12 -8 21.7397 10.402 2
 0 -12 8 -1.5238 8.0048 3
 0 -12 -8 2.37198 9.39675 1
 0 12 8 5.63097 7.24172 2
 0 12 -8 0.73445 10.6808 2
 -1 -12 -8 16.0506 10.1379 1
 1 -12 8 10.5531 9.19783 3
 -1 12 -8 12.6356 11.6929 2
 1 12 8 7.30663 7.10716 2
 -2 -12 -8 0.50347 11.0964 1
 2 -12 8 9.09807 9.98881 3
 2 12 8 -5.4796 6.08147 2
 -2 12 -8 9.02309 11.5439 2
 9 0 -9 7.32039 8.35993 3
 9 0 -9 -3.4031 6.75552 1
 -9 0 9 -6.8994 7.96183 2
 -9 0 9 3.10391 9.85156 3
 8 0 -9 13.8944 5.46706 1
 -8 0 9 -6.6296 6.11208 2
 -8 0 9 19.2148 7.6743 3
 8 0 -9 4.38477 5.86012 3
 -7 0 9 6.99327 5.77117 3
 -7 0 9 5.39964 4.57716 2
 7 0 -9 -0.7479 4.35995 3
 7 0 -9 -2.184 3.91382 1
 -6 0 9 9.54583 4.11177 2
 6 0 -9 1.50584 3.28117 3
 -6 0 9 5.57387 4.49373 3
 -5 0 9 3.26335 3.33697 3
 -5 0 9 -1.069 2.94248 2
 5 0 -9 -2.4032 2.60223 3
 4 0 -9 3.28994 2.12647 3
 -4 0 9 -1.9583 2.65608 2
 -4 0 9 2.28609 2.62657 3
 3 0 -9 -0.4566 1.78835 3
 3 0 -9 1.94469 2.49563 2
 -3 0 9 0.90711 2.17872 2
 2 0 -9 -1.6221 2.15303 2
 2 0 -9 -2.1744 1.26267 3
 -2 0 9 -1.662 1.99025 2
 1 0 -9 1.9611 1.89295 2
 -1 0 9 -0.9562 1.76549 2
 0 0 9 0.62764 1.63657 2
 0 0 -9 1.79991 1.59525 2
 -1 0 -9 -2.0208 1.59387 2
 -1 0 -9 3.44197 1.62059 3
 -1 0 -9 -1.3047 1.43966 1
 -2 0 -9 0.53932 2.05214 1
 2 0 9 -2.3532 1.73019 1
 -2 0 -9 3.31626 2.03342 3
 -3 0 -9 0.66036 2.51033 3
 -3 0 -9 3.46068 2.56756 1
 3 0 9 -0.9223 2.05509 1
 -4 0 -9 -1.2428 2.88003 1
 -4 0 -9 0.36113 3.36612 3
 4 0 9 -2.4042 2.47078 1
 5 0 9 0.54327 3.3084 1
 -5 0 -9 1.23163 3.80812 1
 -5 0 -9 -4.2466 4.43673 3
 6 0 9 0.33943 4.2887 1
 -6 0 -9 4.63966 5.80212 3
 -6 0 -9 8.022 5.13147 1
 -7 0 -9 7.70638 7.54939 3
 7 0 9 2.83565 5.8459 1
 -8 0 -9 18.9341 10.6701 3
 8 0 9 -0.2985 7.52763 1
 -9 -1 9 51.6073 10.7732 3
 9 -1 -9 58.6275 9.05273 3
 9 -1 -9 52.3723 9.14202 1
 -9 -1 9 72.6717 10.0663 2
 9 1 -9 44.0262 8.072 1
 -9 1 9 74.2607 9.96732 2
 -9 1 9 58.3436 11.526 3
 8 -1 -9 234.65 12.0224 3
 -8 -1 9 245.665 12.8333 2
 -8 -1 9 231.232 13.5343 3
 8 -1 -9 244.539 12.7958 1
 8 1 -9 199.414 10.9315 1
 -8 1 9 217.09 14.3373 3
 -8 1 9 214.115 13.0017 2
 8 1 -9 226.213 12.0506 3
 -7 -1 9 11.0387 4.84028 2
 -7 -1 9 5.84524 5.68747 3
 7 -1 -9 2.06167 4.28968 3
 7 -1 -9 7.86549 4.67089 1
 -7 1 9 3.55192 5.90807 3
 7 1 -9 7.42911 4.07751 1
 7 1 -9 0.91103 4.47607 3
 -7 1 9 -0.1757 4.89184 2
 -6 -1 9 520.583 14.8005 2
 -6 -1 9 505.41 13.0925 3
 6 -1 -9 505.253 12.7243 3
 6 1 -9 514.168 12.4636 3
 -6 1 9 496.708 13.6276 3
 6 1 -9 498.036 14.8392 1
 -6 1 9 517.32 15.0894 2
 5 -1 -9 206.613 7.22093 3
 -5 -1 9 221.485 8.59855 2
 -5 -1 9 207.941 7.44401 3
 5 1 -9 212.353 6.8486 3
 -5 1 9 199.655 7.92998 3
 -5 1 9 210.013 8.49151 2
 -4 -1 9 200.274 7.64739 2
 4 -1 -9 193.497 6.22839 3
 -4 -1 9 205.433 6.10181 3
 -4 1 9 202.297 6.78366 3
 4 1 -9 210.499 8.26153 2
 4 1 -9 211.803 5.71921 3
 -4 1 9 197.547 7.66595 2
 -3 -1 9 512.027 12.5653 2
 -3 -1 9 535.12 10.0684 3
 3 -1 -9 525.521 10.5968 3
 3 1 -9 520.423 9.88872 3
 -3 1 9 514.826 12.4656 2
 3 1 -9 523.875 12.7396 2
 -2 -1 9 8.99348 2.42094 2
 2 -1 -9 11.1647 1.79298 3
 2 -1 -9 12.3645 2.41299 2
 2 1 -9 9.27563 1.12594 3
 -2 1 9 7.87547 2.05801 2
 2 1 -9 7.37065 2.52287 2
 1 -1 -9 1839.45 35.7811 2
 -1 -1 9 1937.5 36.4188 2
 -1 1 9 1936.6 35.8578 2
 1 1 -9 1920.81 36.3806 2
 0 -1 9 248.453 6.76233 2
 0 -1 -9 249.308 6.01947 2
 0 1 -9 256.693 6.86887 2
 0 1 -9 252.594 5.17775 3
 0 1 9 255.074 6.06454 2
 -1 -1 -9 112.425 3.73254 2
 -1 -1 -9 113.025 4.80697 1
 -1 1 -9 114.264 4.69543 2
 -1 1 -9 112.268 3.85843 3
 -1 1 -9 110.435 4.01896 1
 -2 -1 -9 609.756 13.9387 1
 2 -1 9 602.967 12.0913 3
 -2 -1 -9 596.931 12.3779 3
 2 -1 9 595.297 13.0792 1
 -2 1 -9 582.01 13.0133 1
 -2 1 -9 595.858 12.1842 3
 2 1 9 598.639 13.877 1
 -3 -1 -9 16.0017 3.04409 3
 -3 -1 -9 19.6668 3.35475 1
 3 -1 9 16.9074 2.58866 1
 3 -1 9 13.4226 2.56905 3
 -3 1 -9 16.815 3.46648 3
 -3 1 -9 22.6269 2.8294 1
 3 1 9 17.9577 2.88343 1
 4 -1 9 91.4026 5.3793 3
 4 -1 9 88.9401 5.5325 1
 -4 -1 -9 101.427 6.69157 1
 -4 -1 -9 95.881 6.18137 3
 -4 1 -9 97.6978 6.55441 3
 4 1 9 94.9873 5.92465 1
 -4 1 -9 105.057 5.92016 1
 -5 -1 -9 56.4221 5.78296 1
 5 -1 9 54.9353 5.63752 3
 -5 -1 -9 57.142 5.61289 3
 5 -1 9 46.8747 4.5846 1
 -5 1 -9 53.3837 5.07304 1
 5 1 9 43.6373 4.89443 1
 -5 1 -9 51.7211 5.87126 3
 -6 -1 -9 166.447 10.6281 3
 6 -1 9 172.685 8.67816 3
 -6 -1 -9 202.759 11.3314 1
 6 -1 9 202.179 9.89101 1
 -6 1 -9 189.919 10.8713 3
 6 1 9 197.016 10.0914 1
 7 -1 9 114.056 8.72088 3
 -7 -1 -9 88.8245 9.03459 1
 7 -1 9 100.868 10.7429 1
 -7 -1 -9 92.3891 9.40777 3
 7 1 9 87.8985 8.18868 1
 -7 1 -9 93.6345 9.25577 3
 -8 -1 -9 26.7972 8.29461 2
 8 -1 9 30.1254 8.30602 1
 -8 -1 -9 37.0908 10.222 3
 -8 1 -9 30.68 10.3578 3
 8 1 9 33.1886 8.5066 1
 -9 -2 9 8.55446 9.00853 2
 -9 -2 9 13.4241 10.585 3
 9 -2 -9 18.643 8.75821 1
 9 -2 -9 12.3285 8.38552 3
 9 2 -9 9.12457 7.05436 1
 -9 2 9 10.1877 7.85184 2
 -9 2 9 3.22195 10.8653 3
 -8 -2 9 26.0592 7.08698 2
 8 -2 -9 29.3543 6.54594 3
 8 -2 -9 25.215 6.93948 1
 -8 -2 9 16.6898 7.83152 3
 -8 2 9 29.5024 8.48685 3
 -8 2 9 19.301 6.65171 2
 8 2 -9 23.0403 5.54569 1
 7 -2 -9 22.9088 5.06133 3
 -7 -2 9 25.0807 5.69112 2
 -7 -2 9 31.217 6.33211 3
 -7 2 9 32.6673 6.7255 3
 7 2 -9 30.9175 5.16939 1
 -7 2 9 16.1097 4.97 2
 -6 -2 9 9.62441 3.93949 2
 6 -2 -9 13.0619 4.11761 3
 -6 -2 9 17.5693 4.55094 3
 -6 2 9 6.14335 4.80538 3
 6 2 -9 16.7211 4.05272 1
 -6 2 9 8.71057 4.20815 2
 -5 -2 9 61.126 5.59034 3
 5 -2 -9 58.5551 4.62107 3
 -5 -2 9 53.4714 6.05888 2
 5 2 -9 61.279 5.87764 2
 5 2 -9 56.6255 4.51577 3
 5 2 -9 59.1879 5.8655 1
 -5 2 9 54.5531 5.27065 2
 -5 2 9 63.0671 5.14613 3
 -4 -2 9 183.738 5.79044 3
 -4 -2 9 193.737 7.51993 2
 4 -2 -9 179.319 6.37222 3
 -4 2 9 192.766 7.55835 2
 4 2 -9 193.457 8.23302 2
 3 -2 -9 316.679 7.76602 3
 -3 -2 9 317.631 9.10262 2
 3 2 -9 307.21 9.32115 2
 -3 2 9 311.591 8.87171 2
 -2 -2 9 43.4585 4.04267 2
 2 2 -9 49.6923 4.86088 2
 -2 2 9 37.6701 3.88236 2
 1 2 -9 117.091 5.21297 2
 -1 2 9 94.9526 3.95672 2
 0 -2 9 70.2809 2.41576 3
 0 -2 -9 76.9262 2.82263 2
 0 2 -9 68.7641 4.40927 2
 0 2 -9 65.0424 2.55307 3
 0 2 9 71.556 2.82114 2
 -2 -2 -9 126.508 5.68017 1
 -2 -2 -9 149.4 11.7816 4
 2 -2 9 115.489 4.59663 3
 -2 2 -9 115.262 4.216 1
 -2 2 -9 121.217 5.06057 3
 2 2 9 120.386 5.38194 1
 3 -2 9 13.2901 2.27057 1
 3 -2 9 14.4155 2.67633 3
 -3 -2 -9 16.7575 3.08658 3
 -3 -2 -9 14.8369 3.07464 1
 -3 2 -9 14.6221 2.36316 1
 -3 2 -9 14.1083 3.46372 3
 3 2 9 13.5423 2.81773 1
 -4 -2 -9 26.6024 4.1431 3
 4 -2 9 21.5827 3.35688 3
 4 -2 9 25.3846 3.35148 1
 -4 -2 -9 31.0563 4.30695 1
 -4 2 -9 34.5154 4.82281 3
 4 2 9 22.1538 3.72156 1
 -4 2 -9 27.0455 3.42807 1
 5 -2 9 24.8113 4.1842 3
 -5 -2 -9 22.4485 4.92748 1
 5 -2 9 22.9909 3.74692 1
 -5 -2 -9 14.9422 4.63202 3
 5 2 9 21.0012 4.11578 1
 -5 2 -9 19.9733 5.37892 3
 6 -2 9 74.5876 7.82706 1
 -6 -2 -9 86.0819 9.9806 1
 6 -2 9 73.4579 6.0314 3
 -6 -2 -9 78.4375 7.4512 3
 6 2 9 59.507 6.50441 1
 -6 2 -9 70.41 7.2024 3
 -7 -2 -9 10.3319 7.11461 1
 -7 -2 -9 6.5462 7.4953 3
 7 -2 9 1.89467 5.18718 3
 7 -2 9 5.55051 5.81879 1
 -7 -2 -9 0.66699 5.76918 2
 7 2 9 4.178 5.86826 1
 -7 2 -9 -3.7545 6.84017 3
 -8 -2 -9 4.1443 9.75658 3
 -8 -2 -9 -13.124 7.68823 2
 8 -2 9 -4.5351 7.60704 1
 8 -2 9 -8.8159 6.18976 3
 8 2 9 -5.0029 7.76745 1
 -8 2 -9 -7.716 8.9375 3
 -9 -3 9 13.3253 10.8657 3
 9 -3 -9 17.8991 9.36526 3
 9 -3 -9 13.6999 9.32957 1
 -9 -3 9 -6.3088 9.35948 2
 -9 3 9 7.1615 11.4215 3
 9 3 -9 17.5726 7.13273 1
 -9 3 9 7.86995 8.29575 2
 -8 -3 9 40.7252 8.21144 2
 -8 -3 9 36.6118 8.30312 3
 8 -3 -9 45.3013 7.25835 3
 8 -3 -9 63.2189 8.5784 1
 -8 3 9 33.5179 7.61169 2
 -8 3 9 49.5642 9.26704 3
 8 3 -9 48.3663 7.01572 1
 -7 -3 9 16.7535 5.41998 2
 -7 -3 9 26.7211 6.50526 3
 7 -3 -9 27.0177 5.57052 3
 -7 3 9 23.3909 6.88611 3
 7 3 -9 14.6514 4.79842 1
 -7 3 9 15.9909 5.38182 2
 -6 -3 9 256.712 9.7273 3
 -6 -3 9 239.246 10.4985 2
 6 -3 -9 258.961 9.65821 3
 6 3 -9 244.235 10.1769 1
 -6 3 9 258.721 10.7659 2
 5 -3 -9 50.2708 4.67532 3
 -5 -3 9 57.2534 4.54185 3
 -5 -3 9 49.3002 5.09836 2
 5 3 -9 50.1907 5.64193 2
 5 3 -9 43.9687 4.95442 1
 -5 3 9 52.4524 5.37207 2
 -4 -3 9 883.862 20.08 2
 -4 -3 9 875.906 16.5659 3
 4 -3 -9 893.243 17.969 3
 -4 3 9 908.243 20.0886 2
 4 3 -9 915.683 20.6754 1
 4 3 -9 867.806 20.2243 2
 -3 -3 9 1234.3 25.5346 2
 3 -3 -9 1201.75 22.7696 3
 -3 -3 9 1223.38 21.141 3
 -3 3 9 1246.12 25.1484 2
 3 3 -9 1173.63 25.3956 2
 3 3 -9 1255.19 26.0893 1
 -2 -3 9 300.604 8.52662 2
 2 3 -9 291.892 8.85346 2
 -2 3 9 281.363 7.79402 2
 -1 -3 9 181.33 6.37393 2
 -1 3 9 178.752 5.32134 2
 1 3 -9 190.305 6.7177 2
 0 -3 -9 236.236 7.39654 1
 0 -3 9 241.826 5.19442 3
 0 3 9 237.479 5.2462 2
 0 3 -9 230.325 7.43747 2
 1 -3 9 404.526 8.48309 3
 -1 -3 -9 401.955 10.7612 1
 -1 3 -9 401.756 8.61504 3
 -1 3 -9 408.633 10.5877 2
 -1 3 -9 410.712 8.34013 1
 2 -3 9 126.213 4.83338 3
 -2 -3 -9 121.254 5.92852 1
 2 3 9 120.787 5.57016 1
 -2 3 -9 118.25 5.30025 3
 -2 3 -9 120.352 3.50696 1
 3 -3 9 47.0566 4.40871 3
 3 -3 9 44.2891 3.24965 1
 -3 -3 -9 39.7293 3.06823 2
 -3 -3 -9 48.9661 5.23399 1
 -3 3 -9 50.9994 4.46821 3
 3 3 9 43.6329 4.61422 1
 -4 -3 -9 304.424 10.6053 1
 -4 -3 -9 305.157 10.0531 3
 4 -3 9 297.258 8.38289 1
 4 -3 9 300.895 9.08235 3
 -4 -3 -9 303.637 8.185 2
 4 3 9 319.167 10.41 1
 -4 3 -9 294.204 9.87026 3
 -5 -3 -9 0.1345 4.76393 3
 -5 -3 -9 0.74228 4.38065 1
 5 -3 9 1.53944 3.40111 3
 -5 -3 -9 -4.9202 3.43705 2
 5 -3 9 -0.8631 2.97184 1
 -5 3 -9 -5.8285 4.53871 3
 5 3 9 -1.3057 3.22021 1
 -6 -3 -9 13.0318 5.92954 1
 -6 -3 -9 8.09366 5.80681 3
 6 -3 9 3.37846 4.48762 3
 -6 -3 -9 -2.7507 4.41163 2
 6 -3 9 1.58279 4.26234 1
 -6 3 -9 -0.3257 6.28491 3
 6 3 9 -2.4496 4.4775 1
 7 -3 9 1.85246 4.70805 3
 -7 -3 -9 -5.4398 6.01777 2
 -7 -3 -9 13.1083 7.7999 3
 -7 -3 -9 1.40514 7.07395 1
 7 -3 9 3.6329 5.8988 1
 -7 3 -9 -4.4932 7.79211 3
 7 3 9 -6.314 5.48261 1
 -8 -3 -9 24.4698 10.4154 3
 8 -3 9 6.29722 7.13828 3
 8 -3 9 18.8312 8.20801 1
 -8 -3 -9 6.65604 10.1079 1
 -8 -3 -9 21.2387 8.81291 2
 -8 3 -9 8.32823 9.95988 3
 8 3 9 10.9991 8.21054 1
 -8 -4 9 18.2539 8.44207 3
 8 -4 -9 22.7944 7.43721 3
 -8 -4 9 13.3417 7.89109 2
 -8 4 9 21.9215 6.83502 2
 8 4 -9 13.5094 5.81902 1
 7 -4 -9 32.1323 6.19105 3
 -7 -4 9 32.089 6.89594 3
 -7 -4 9 27.4357 6.53243 2
 -7 4 9 26.1896 5.99706 2
 7 4 -9 36.7327 5.81061 1
 -6 -4 9 1.13545 4.84001 3
 -6 -4 9 9.60853 4.47686 2
 6 -4 -9 1.13767 4.50611 3
 -6 4 9 -5.7466 4.47899 2
 6 4 -9 4.35487 3.88426 1
 6 4 -9 0.86679 6.03079 2
 5 -4 -9 333.741 10.4517 3
 -5 -4 9 334.303 9.36598 3
 -5 -4 9 348.305 11.3741 2
 5 4 -9 333.245 12.2456 2
 5 4 -9 345.856 11.5612 1
 -4 -4 9 3.94754 2.57533 3
 4 -4 -9 3.01487 3.02606 3
 -4 -4 9 2.80321 3.06556 2
 4 4 -9 -1.8967 2.81135 1
 4 4 -9 1.90614 3.79051 2
 -2 -4 9 136.241 6.00188 2
 2 4 -9 137.7 5.67245 1
 2 4 -9 133.77 6.71908 2
 -1 -4 9 17.0134 1.65515 3
 -1 -4 9 17.4573 2.63883 2
 -1 4 9 14.5155 2.22288 2
 1 4 -9 13.8313 2.98065 2
 1 4 -9 17.1289 2.27 1
 0 -4 9 8.42043 1.86307 3
 0 -4 -9 -2.1337 11.9579 4
 0 -4 -9 4.58652 2.13673 1
 0 4 -9 7.37364 1.48752 1
 0 4 -9 8.15715 2.77989 2
 0 4 9 6.81581 1.41484 2
 -1 -4 -9 396.639 24.3792 4
 3 -4 9 108.798 5.70547 3
 -3 -4 -9 95.6383 3.17769 2
 -3 -4 -9 72.8625 18.1581 4
 -3 -4 -9 99.1199 6.63851 1
 3 4 9 100.629 5.87569 1
 -3 4 -9 98.8565 6.62679 3
 -4 -4 -9 23.8698 2.80829 2
 4 -4 9 16.2998 3.68602 3
 -4 -4 -9 22.0828 4.50148 1
 4 -4 9 11.0385 2.56252 1
 -4 -4 -9 16.389 4.58261 3
 4 4 9 10.4672 3.43062 1
 -4 4 -9 22.6114 4.60658 3
 5 -4 9 6.8646 3.86757 3
 -5 -4 -9 5.49333 5.09474 3
 5 -4 9 0.85013 3.07325 1
 -5 -4 -9 1.172 3.33993 2
 -5 -4 -9 -0.6477 4.58578 1
 -5 4 -9 6.72 5.47266 3
 5 4 9 -0.6893 3.48693 1
 -6 -4 -9 -0.2755 5.90594 3
 6 -4 9 1.01128 4.25371 1
 -6 -4 -9 -0.1074 5.54381 1
 6 -4 9 -0.4343 4.64599 3
 -6 -4 -9 -4.119 4.46649 2
 -6 4 -9 -6.8767 6.40812 3
 6 4 9 -1.8202 4.14755 1
 -7 -4 -9 11.9967 6.42152 2
 7 -4 9 8.99058 6.02701 1
 7 -4 9 11.2614 5.99502 3
 -7 -4 -9 15.9881 8.23588 1
 -7 -4 -9 19.7587 8.01938 3
 -7 4 -9 10.342 8.3752 3
 7 4 9 17.1177 6.17951 1
 -8 -4 -9 7.3216 10.3276 1
 8 -4 9 6.90563 8.10011 1
 -8 -4 -9 -3.0907 8.13851 2
 8 -4 9 6.52616 7.09747 3
 -8 -4 -9 24.0469 11.4657 3
 8 4 9 -9.8411 8.05932 1
 -8 4 -9 -14.027 10.9062 3
 8 -5 -9 66.467 9.24926 3
 -8 -5 9 78.7811 10.1366 3
 -8 -5 9 72.8353 10.2469 2
 8 5 -9 71.3205 8.81545 1
 -8 5 9 53.6179 8.86157 2
 7 -5 -9 -0.5648 5.94012 3
 -7 -5 9 4.81119 6.5995 2
 -7 -5 9 -1.2398 6.64875 3
 7 5 -9 -9.9603 5.15023 1
 -7 5 9 0.70328 6.05292 2
 6 -5 -9 101.259 8.71227 3
 -6 -5 9 98.1806 8.62494 3
 -6 -5 9 89.7753 8.99652 2
 6 5 -9 112.319 8.89435 1
 6 5 -9 119.127 11.9047 2
 -5 -5 9 1.3493 3.88758 2
 5 -5 -9 -1.2021 3.93811 3
 -5 -5 9 -0.4943 3.66913 3
 5 5 -9 -0.3 4.72876 2
 5 5 -9 9.50345 4.15121 1
 -4 -5 9 95.1014 5.19962 3
 -4 -5 9 93.4116 6.5287 2
 4 -5 -9 88.4658 6.32997 3
 4 5 -9 91.9212 7.61734 2
 4 5 -9 88.0487 6.74423 1
 -3 -5 9 329.724 56.6958 4
 -3 -5 9 406.209 8.73121 3
 -3 -5 9 408.784 11.517 2
 3 -5 -9 388.869 10.5978 3
 3 5 -9 413.007 11.4027 1
 3 5 -9 401.913 12.0386 2
 -2 -5 9 50.7501 4.81561 2
 2 5 -9 53.0152 4.61341 1
 2 5 -9 55.6652 5.93265 2
 -1 -5 9 481.784 9.75269 3
 1 5 -9 494.995 12.8974 2
 1 5 -9 491.917 11.2782 1
 0 -5 9 139.268 4.83104 3
 0 -5 -9 147.076 6.37566 1
 0 5 -9 142.711 4.11385 1
 0 5 -9 144.083 7.00687 2
 -1 -5 -9 538.598 14.0708 1
 1 -5 9 536.535 11.5671 3
 -1 5 -9 556.067 14.0514 2
 -2 -5 -9 23.4022 16.534 4
 -2 -5 -9 51.9951 5.40488 1
 2 -5 9 56.5452 4.25339 3
 2 5 9 51.1414 4.85584 1
 -2 5 -9 56.5797 4.46305 3
 -3 -5 -9 5.29873 3.48098 1
 3 -5 9 6.7084 3.38482 3
 3 5 9 8.52732 2.70948 1
 -3 5 -9 8.53014 4.0751 3
 -4 -5 -9 134.913 8.97535 1
 -4 -5 -9 135.737 4.98629 2
 4 -5 9 132.379 4.57813 1
 4 -5 9 146.869 7.85605 3
 4 5 9 145.718 7.7478 1
 -4 5 -9 147.28 9.03282 3
 -5 -5 -9 2.48852 3.24959 2
 5 -5 9 0.57325 4.38732 3
 -5 -5 -9 3.79894 4.64381 1
 5 -5 9 -1.0032 2.84557 1
 -5 -5 -9 3.0519 5.45797 3
 5 5 9 3.33323 3.72972 1
 -5 5 -9 3.80936 5.84602 3
 -6 -5 -9 27.9981 6.62014 1
 6 -5 9 31.3281 5.8965 3
 6 -5 9 21.716 4.45309 1
 -6 -5 -9 23.3996 5.14641 2
 -6 -5 -9 25.0635 7.68075 3
 6 5 9 23.6303 5.31767 1
 -6 5 -9 37.8528 7.94132 3
 7 -5 9 45.2669 6.62496 1
 -7 -5 -9 38.7979 6.86639 2
 -7 -5 -9 59.7303 9.51533 1
 -7 -5 -9 43.1286 9.35798 3
 7 -5 9 55.0435 7.46443 3
 -7 5 -9 48.9021 10.2292 3
 7 5 9 34.2902 6.80149 1
 -8 -5 -9 13.3395 10.4908 1
 -8 -5 -9 -1.8799 12.1056 3
 8 -5 9 9.22857 8.03446 1
 8 -5 9 2.67932 8.56712 3
 -8 -5 -9 9.62161 8.67827 2
 8 5 9 -7.5487 8.13342 1
 -8 5 -9 8.69515 12.5428 3
 -8 -6 9 1.26926 9.28868 2
 -8 -6 9 29.9754 9.91183 3
 8 -6 -9 0.76827 8.6599 3
 8 6 -9 2.17883 8.01512 1
 -8 6 9 1.76926 8.85083 2
 -7 -6 9 125.011 11.7298 3
 7 -6 -9 118.674 11.7627 3
 -7 -6 9 118.466 12.4523 2
 7 6 -9 131.17 12.0585 1
 6 -6 -9 3.6791 5.26876 3
 -6 -6 9 -0.4686 5.53115 2
 -6 -6 9 7.58725 5.45761 3
 6 6 -9 11.1577 7.36498 2
 6 6 -9 -0.1946 5.62281 1
 -5 -6 9 44.0226 5.74838 2
 -5 -6 9 85.0861 72.8677 4
 -5 -6 9 47.1064 4.85039 3
 5 -6 -9 50.5725 5.83195 3
 5 6 -9 41.1116 6.49013 2
 5 6 -9 37.4672 5.63121 1
 -4 -6 9 78.0542 5.79074 3
 -4 -6 9 75.6183 6.95842 2
 -4 -6 9 124.114 69.5763 4
 4 -6 -9 71.1535 6.77697 3
 4 6 -9 81.7355 6.98067 2
 4 6 -9 67.5878 7.23889 1
 -3 -6 9 149.895 7.34778 2
 3 -6 -9 136.85 7.25444 3
 3 6 -9 151.623 8.91482 2
 3 6 -9 141.141 7.45861 1
 2 -6 -9 95.6535 29.6927 4
 -2 -6 9 80.6422 5.74672 2
 2 6 -9 70.0719 5.29403 1
 2 6 -9 70.7744 6.88161 2
 0 -6 -9 28.5008 17.3673 4
 0 -6 9 27.2267 3.01908 3
 0 -6 -9 35.3424 3.99774 1
 0 6 -9 26.8167 4.33453 2
 0 6 -9 24.7969 2.49776 1
 2 -6 9 4.25911 3.29456 3
 -2 -6 -9 52.1815 20.0506 4
 -2 -6 -9 6.44079 3.55881 1
 3 -6 9 9.66473 4.04578 3
 -3 -6 -9 8.7126 4.14945 1
 -3 6 -9 6.04783 4.44048 3
 3 6 9 7.49753 3.09374 1
 4 -6 9 -2.5491 4.4315 3
 -4 -6 -9 4.79026 4.83591 1
 -4 6 -9 1.341 5.33418 3
 4 6 9 -2.2537 3.2726 1
 -5 -6 -9 136.616 10.6206 1
 -5 -6 -9 127.925 10.7242 3
 -5 -6 -9 134.238 6.37261 2
 5 -6 9 142.15 9.70236 3
 -5 6 -9 126.029 11.5999 3
 5 6 9 161.172 9.50306 1
 6 -6 9 10.8274 6.33201 3
 -6 -6 -9 16.3659 6.14097 1
 6 -6 9 4.13991 3.97916 1
 -6 -6 -9 22.382 8.11921 3
 -6 -6 -9 8.96208 4.4845 2
 -6 6 -9 9.82958 8.10967 3
 6 6 9 5.92098 4.8302 1
 7 -6 9 5.34447 5.61515 1
 -7 -6 -9 24.4668 10.0511 3
 -7 -6 -9 13.1845 6.3118 2
 7 -6 9 37.8214 8.12858 3
 -7 -6 -9 15.1555 8.34523 1
 7 6 9 17.5314 6.5387 1
 -7 6 -9 14.4085 10.9692 3
 -7 -7 9 -8.6361 7.84667 2
 7 -7 -9 -0.7826 7.11408 3
 -7 -7 9 -2.8202 7.86809 3
 7 7 -9 -11.626 7.25034 1
 7 7 -9 10.3699 11.0094 2
 6 -7 -9 52.6804 7.15741 3
 -6 -7 9 55.1445 8.06274 2
 -6 -7 9 54.3463 6.89714 3
 6 7 -9 54.4298 7.82222 1
 6 7 -9 52.4696 9.80137 2
 -5 -7 9 76.1292 7.37398 2
 5 -7 -9 90.6576 7.42888 3
 -5 -7 9 116.196 86.3751 4
 -5 -7 9 78.6583 6.3204 3
 5 7 -9 79.8598 8.11012 2
 5 7 -9 84.8226 7.61133 1
 -3 -7 9 7.39383 3.76911 2
 3 -7 -9 8.40425 4.03055 3
 3 7 -9 6.7568 3.87105 1
 3 7 -9 12.4727 5.0799 2
 2 7 -9 157.56 9.23392 2
 2 7 -9 155.001 7.20215 1
 1 -7 -9 812.424 19.7714 1
 -1 -7 9 799.707 16.3506 3
 1 7 -9 837.294 20.1604 2
 1 7 -9 833.401 17.8574 1
 0 -7 9 72.6704 5.45699 3
 0 -7 -9 62.6261 6.3394 1
 0 7 -9 73.5835 7.60353 2
 0 7 -9 59.7043 3.31758 1
 -1 -7 -9 9.29701 21.6565 4
 1 -7 9 37.1462 4.13461 3
 -1 -7 -9 31.0165 4.24937 1
 -1 7 -9 33.0696 5.08499 2
 2 -7 9 165.102 7.82194 3
 -2 -7 -9 160.036 8.9369 1
 2 7 9 173.122 8.10618 1
 -3 -7 -9 57.2359 6.56746 1
 -3 -7 -9 53.2195 26.332 4
 3 -7 9 48.5117 5.80428 3
 3 7 9 47.0388 5.08002 1
 4 -7 9 18.4959 5.50071 3
 -4 -7 -9 13.3325 5.71626 1
 4 7 9 16.4587 4.34859 1
 -5 -7 -9 0.78713 3.31786 2
 5 -7 9 -2.1812 5.55888 3
 -5 -7 -9 3.51579 5.87242 1
 -5 7 -9 5.05372 7.57083 3
 5 7 9 2.73848 4.00513 1
 -6 -7 -9 17.5437 8.74851 3
 -6 -7 -9 13.2337 5.09078 2
 6 -7 9 4.6583 6.95015 3
 -6 -7 -9 21.1472 7.43641 1
 6 7 9 13.6817 5.74091 1
 -7 -7 -9 43.9997 10.0687 1
 7 -7 9 37.9505 9.26557 3
 -7 -7 -9 27.2672 12.2043 3
 -7 -7 -9 41.0294 7.12331 2
 7 -7 9 27.4894 5.39401 1
 7 7 9 64.5005 8.18015 1
 -7 7 -9 38.4054 12.6815 3
 -7 -8 9 27.5496 9.24806 3
 -7 -8 9 34.4991 9.99787 2
 7 -8 -9 33.0473 9.43088 3
 7 8 -9 26.5707 9.34615 1
 7 8 -9 34.5392 13.0588 2
 -6 -8 9 11.2735 7.03966 2
 -6 -8 9 3.21922 6.4248 3
 6 -8 -9 -2.8471 6.77034 3
 6 8 -9 12.9102 9.57865 2
 6 8 -9 -1.005 7.04555 1
 5 -8 -9 105.826 9.87422 3
 -5 -8 9 122.84 10.9447 2
 -5 -8 9 99.1524 9.58705 3
 5 8 -9 108.105 9.80456 2
 5 8 -9 96.7808 8.59246 1
 4 -8 -9 155.474 9.47646 3
 -4 -8 9 134.219 10.4096 2
 4 8 -9 153.646 12.424 2
 4 8 -9 173.149 10.4972 1
 3 -8 -9 13.2924 4.37334 3
 -3 -8 9 8.86545 4.7854 2
 3 8 -9 4.93398 5.71927 2
 3 8 -9 10.8796 4.27067 1
 2 -8 -9 201.857 9.13783 1
 2 8 -9 211.082 11.222 2
 2 8 -9 196.036 8.32936 1
 1 -8 -9 23.5348 28.5309 4
 1 -8 -9 34.1467 4.91661 1
 -1 -8 9 42.5891 4.47037 3
 1 8 -9 29.2086 3.55953 1
 1 8 -9 44.6626 6.17254 2
 0 -8 -9 143.096 8.74667 1
 0 -8 9 138.549 7.27475 3
 0 8 -9 134.114 9.54377 2
 0 8 9 135.226 6.18004 2
 -1 -8 -9 76.1424 7.94525 1
 1 -8 9 80.666 7.05556 3
 1 8 9 77.5383 4.62183 2
 -1 8 -9 107.263 8.89336 2
 2 -8 9 44.1688 5.29818 3
 -2 -8 -9 27.5155 5.66066 1
 -2 -8 -9 33.3744 26.3061 4
 -3 -8 -9 17.9929 29.9035 4
 -3 -8 -9 73.1382 7.58412 1
 3 -8 9 83.3397 7.14462 3
 3 8 9 81.6038 7.43796 1
 4 -8 9 10.9076 6.15224 3
 -4 -8 -9 12.5878 6.09058 1
 4 8 9 9.49835 4.54976 1
 5 -8 9 25.0789 8.04222 3
 -5 -8 -9 21.5878 7.66556 1
 5 8 9 26.7253 5.36371 1
 -6 -8 -9 16.5886 10.5982 3
 6 -8 9 9.83939 8.05546 3
 -6 -8 -9 31.8938 8.26131 1
 6 8 9 10.5585 6.00389 1
 6 -9 -9 4.66982 7.50577 3
 -6 -9 9 6.07368 8.65976 2
 -6 -9 9 1.35551 7.71897 3
 6 9 -9 2.93354 10.9706 2
 6 9 -9 3.57447 8.16057 1
 -5 -9 9 0.27476 7.08151 2
 -5 -9 9 9.19688 6.61268 3
 5 -9 -9 1.27566 5.9886 3
 5 9 -9 4.99944 6.3722 1
 5 9 -9 3.07899 8.8391 2
 -4 -9 9 98.188 8.65693 2
 -4 -9 9 42.2399 103.642 4
 4 -9 -9 80.6855 7.68728 3
 4 9 -9 76.7337 7.40999 1
 4 9 -9 87.4046 9.93922 2
 3 -9 -9 64.0642 6.46955 1
 3 -9 -9 40.1497 5.96797 3
 3 9 -9 63.277 8.26489 2
 3 9 -9 62.0209 6.22827 1
 2 -9 -9 146.702 9.64685 1
 2 9 -9 145.063 7.88492 1
 2 9 -9 157.394 11.7815 2
 1 -9 -9 113.198 9.29904 1
 -1 -9 9 109.465 7.87375 3
 1 9 -9 118.264 6.18429 1
 1 9 -9 113.343 10.6352 2
 0 -9 -9 8.74932 4.99816 1
 0 -9 9 6.99561 4.52161 3
 0 9 -9 10.5151 5.64464 2
 0 9 9 6.97813 3.98135 2
 -1 -9 -9 164.881 10.7868 1
 1 -9 9 173.677 9.33394 3
 -1 9 -9 184.259 11.9157 2
 1 9 9 167.615 6.85929 2
 -2 -9 -9 31.4277 6.55278 1
 -2 -9 -9 67.1965 34.1106 4
 2 -9 9 40.8316 6.15253 3
 -2 9 -9 25.076 6.256 2
 -3 -9 -9 35.6542 7.41223 1
 -3 -9 -9 82.7208 39.4605 4
 3 -9 9 27.1283 6.76104 3
 3 9 9 15.8425 5.21289 1
 4 -9 9 42.8687 8.13546 3
 -4 -9 -9 43.2056 8.42844 1
 -4 -9 -9 16.453 39.1723 4
 4 9 9 39.7658 5.95635 1
 -5 -9 -9 -10.242 7.59973 1
 5 -9 9 9.1277 8.22337 3
 5 9 9 -5.1309 5.39247 1
 6 -9 9 26.4199 10.1372 3
 -6 -9 -9 3.06234 12.6081 3
 -6 -9 -9 17.45 9.63708 1
 6 9 9 0.6448 7.07928 1
 -5 -10 9 12.7597 9.03335 2
 -5 -10 9 13.9578 8.52757 3
 5 -10 -9 16.135 7.45965 3
 5 -10 -9 3.538 61.6335 4
 5 10 -9 -0.5069 10.9057 2
 5 10 -9 17.922 7.77876 1
 4 -10 -9 17.1105 6.68242 1
 4 -10 -9 6.63608 6.15053 3
 4 10 -9 12.3376 6.66727 1
 4 10 -9 22.513 10.2295 2
 3 -10 -9 31.4601 6.81295 3
 3 -10 -9 40.8108 7.03372 1
 3 10 -9 41.9112 9.17067 2
 3 10 -9 35.4379 6.16847 1
 2 -10 -9 79.896 7.97504 1
 2 10 -9 68.7815 7.6725 1
 2 10 -9 76.714 9.4334 2
 1 -10 -9 3.41876 5.55958 1
 -1 -10 9 -7.3162 5.08778 3
 1 10 -9 6.31619 7.08162 2
 1 10 -9 5.65919 3.41683 1
 0 -10 9 130.494 9.72934 3
 0 -10 -9 150.943 11.7501 1
 0 10 -9 138.522 13.2504 2
 0 10 9 122.875 8.64454 2
 -1 -10 -9 -8.4482 37.0041 4
 -1 -10 -9 27.9644 7.34721 1
 1 -10 9 21.7422 6.31771 3
 1 10 9 19.4852 4.52317 2
 -1 10 -9 17.0593 7.67743 2
 -2 -10 -9 66.5391 8.60508 1
 2 -10 9 73.2964 7.78006 3
 -2 -10 -9 17.5393 40.7529 4
 -2 10 -9 60.5378 8.35399 2
 -3 -10 -9 -12.493 42.5567 4
 -3 -10 -9 38.523 8.73138 1
 3 -10 9 31.5113 7.66487 3
 -4 -10 -9 7.61281 9.01698 1
 4 -10 9 -8.6993 8.05635 3
 4 10 9 -2.8987 6.38396 1
 5 -10 9 40.3153 10.8783 3
 -5 -10 -9 44.2139 11.5462 1
 5 10 9 36.5191 8.6921 1
 4 -11 -9 15.0642 8.2576 1
 4 -11 -9 6.61334 7.21598 3
 4 11 -9 -4.0587 11.7481 2
 4 11 -9 7.60591 7.7324 1
 3 -11 -9 16.6417 7.66103 1
 3 -11 -9 -2.1022 6.38973 3
 3 11 -9 9.89856 6.39018 1
 3 11 -9 18.6274 10.4622 2
 2 -11 -9 1.1093 6.87212 1
 2 11 -9 -4.5003 9.05288 2
 2 11 -9 -1.9334 4.99982 1
 1 -11 -9 0.41372 6.80183 1
 -1 -11 9 -6.8449 6.67351 3
 -1 11 9 -0.8048 6.01783 2
 1 11 -9 4.62141 8.44542 2
 0 -11 9 2.25592 6.54103 3
 0 -11 -9 7.61061 7.27899 1
 0 11 9 4.78428 5.73 2
 0 11 -9 13.5157 8.98756 2
 -1 -11 -9 8.92966 8.32773 1
 1 -11 9 19.3086 7.67803 3
 -1 11 -9 17.9183 9.19376 2
 1 11 9 13.1516 5.42327 2
 -2 -11 -9 -1.4573 8.88348 1
 2 -11 9 5.74225 8.16091 3
 -2 11 -9 7.56185 9.35446 2
 3 -11 9 39.132 9.58669 3
 -3 -11 -9 33.9261 10.7923 1
 -3 11 -9 45.7941 11.4854 2
 -4 -11 -9 35.2616 12.4628 1
 2 -12 -9 61.9584 10.7097 1
 -2 -12 9 42.8442 9.08889 3
 2 -12 -9 64.9595 8.51491 3
 2 12 -9 43.6189 12.4154 2
 2 12 -9 50.7054 6.73825 1
 1 -12 -9 1.11123 8.96593 1
 -1 -12 9 -0.9567 7.9903 3
 -1 12 9 -2.3862 7.71584 2
 1 12 -9 0.85171 10.8035 2
 0 -12 9 66.5781 9.8212 3
 0 -12 -9 72.2129 10.9758 1
 0 12 -9 63.9942 12.3589 2
 0 12 9 85.4593 8.12988 2
 1 -12 9 37.9082 10.2061 3
 -1 -12 -9 19.4992 10.075 1
 1 12 9 36.1372 7.04301 2
 -1 12 -9 22.5302 11.7875 2
 -2 -12 -9 18.1591 11.8796 1
 2 -12 9 40.2738 10.5916 3
 -2 12 -9 27.0199 12.4203 2
 9 0 -10 19.3313 7.27518 1
 -9 0 10 19.0994 8.38264 2
 -9 0 10 32.5587 10.7671 3
 9 0 -10 30.5142 8.70306 3
 -8 0 10 367.435 15.5159 3
 8 0 -10 349.772 14.5834 1
 -8 0 10 396.067 15.8189 2
 8 0 -10 346.832 13.4278 3
 -7 0 10 3.98349 4.89298 2
 7 0 -10 6.94251 4.28304 3
 -7 0 10 6.10456 5.86986 3
 7 0 -10 7.41664 4.05077 1
 -6 0 10 247.629 9.70022 3
 6 0 -10 256.611 8.69784 3
 -6 0 10 269.377 10.9184 2
 -5 0 10 26.2746 4.03058 3
 -5 0 10 23.7891 4.10196 2
 5 0 -10 22.852 3.29518 3
 -4 0 10 1025.6 19.0343 3
 -4 0 10 1009.89 22.0453 2
 4 0 -10 1016.44 18.8367 3
 3 0 -10 813.015 18.0975 2
 -3 0 10 835.551 18.1345 2
 3 0 -10 843.764 15.1655 3
 -2 0 10 354.119 9.16387 2
 2 0 -10 361.017 7.0825 3
 2 0 -10 357.86 9.18965 2
 1 0 -10 1261.56 24.6652 2
 -1 0 10 1255.8 24.6362 2
 0 0 10 34.5912 3.21154 2
 0 0 -10 39.9589 3.33837 2
 -1 0 -10 1739.06 30.1908 3
 -1 0 -10 1752.57 33.0318 2
 -1 0 -10 1737.79 34.5023 1
 -2 0 -10 712.134 14.0933 3
 -2 0 -10 697.216 15.6 1
 2 0 10 704.661 15.6338 1
 -3 0 -10 5.51533 2.79122 1
 -3 0 -10 4.3088 2.7584 3
 3 0 10 2.87708 2.27409 1
 4 0 10 25.9239 3.76706 1
 -4 0 -10 32.1315 4.34526 3
 -4 0 -10 31.8639 4.1507 1
 -5 0 -10 -4.8187 4.44779 3
 -5 0 -10 3.28511 4.07857 1
 5 0 10 1.13976 3.33451 1
 -6 0 -10 132.108 10.223 3
 -6 0 -10 135.301 10.327 1
 6 0 10 123.799 8.9164 1
 7 0 10 40.9572 6.99463 1
 -7 0 -10 36.5615 8.37465 3
 -8 0 -10 57.4976 11.2039 3
 8 0 10 37.314 8.83829 1
 9 -1 -10 16.0403 8.42015 3
 9 -1 -10 2.98106 7.63451 1
 -9 -1 10 17.7964 10.4774 3
 -9 -1 10 32.0086 8.62953 2
 9 1 -10 3.24652 6.69598 1
 -9 1 10 -9.0654 10.4438 3
 -9 1 10 24.5304 7.995 2
 8 -1 -10 2.85926 5.85215 3
 8 -1 -10 13.3652 5.97158 1
 -8 -1 10 11.2662 7.56276 3
 -8 -1 10 19.0754 6.60405 2
 8 1 -10 3.73024 6.2893 3
 8 1 -10 5.95824 4.75305 1
 -8 1 10 18.6195 6.29723 2
 -8 1 10 9.98735 8.15207 3
 -7 -1 10 -4.1511 5.57106 3
 -7 -1 10 1.02295 4.43427 2
 7 -1 -10 5.8376 4.4343 3
 7 1 -10 -0.9518 4.50476 3
 -7 1 10 -1.8717 5.90209 3
 -7 1 10 0.93028 5.06239 2
 7 1 -10 5.66074 4.11752 1
 -6 -1 10 32.0667 4.98894 3
 -6 -1 10 27.0741 4.87214 2
 6 -1 -10 27.3192 4.32504 3
 -6 1 10 22.4775 5.1569 3
 6 1 -10 30.7873 4.16673 3
 6 1 -10 28.4202 4.54489 1
 -6 1 10 30.1815 5.02363 2
 5 -1 -10 103.565 5.80464 3
 -5 -1 10 119.277 7.15041 2
 -5 -1 10 111.188 6.18688 3
 -5 1 10 112.87 6.82553 3
 -5 1 10 115.344 7.02221 2
 5 1 -10 118.347 5.38639 3
 -4 -1 10 26.5422 3.39359 2
 4 -1 -10 31.2361 3.17909 3
 -4 -1 10 30.1395 3.09467 3
 4 1 -10 34.1878 4.26805 2
 4 1 -10 29.8973 2.64478 3
 -4 1 10 32.4454 4.07208 2
 -3 -1 10 134.66 5.97091 2
 -3 -1 10 135.049 4.1033 3
 3 -1 -10 134.572 4.7166 3
 3 1 -10 133.433 6.25733 2
 -3 1 10 123.982 5.84846 2
 3 1 -10 133.963 3.80703 3
 2 -1 -10 26.1337 3.0326 2
 -2 -1 10 25.6146 3.06576 2
 2 -1 -10 31.5551 2.7998 3
 -2 1 10 22.1045 2.7555 2
 2 1 -10 23.429 3.07709 2
 2 1 -10 23.1017 1.64952 3
 -1 -1 10 87.318 4.40861 2
 1 -1 -10 78.2566 4.03559 2
 1 1 -10 105.529 4.87525 2
 -1 1 10 84.7448 3.98626 2
 0 -1 10 95.8758 4.30765 2
 0 -1 -10 96.347 3.69338 2
 0 1 10 88.5436 3.62429 2
 0 1 -10 96.6596 3.02584 3
 0 1 -10 94.0327 4.56637 2
 -1 -1 -10 152.07 5.59304 1
 -1 -1 -10 146.044 4.47129 2
 -1 1 -10 148.808 4.87152 1
 -1 1 -10 143.195 5.44925 2
 -1 1 -10 154.525 4.57093 3
 2 -1 10 26.0702 2.58379 3
 -2 -1 -10 25.5623 2.93821 3
 -2 -1 -10 22.5134 2.84536 1
 2 1 10 26.2725 2.96001 1
 -2 1 -10 28.5893 2.67419 1
 -2 1 -10 28.3091 2.92267 3
 3 -1 10 33.7723 3.19386 3
 -3 -1 -10 38.9539 3.86127 1
 3 -1 10 40.2723 3.95999 1
 -3 -1 -10 34.4683 3.91805 3
 3 1 10 35.3562 3.65243 1
 -3 1 -10 41.7883 4.18074 1
 -3 1 -10 33.4301 3.63162 3
 -4 -1 -10 22.6937 4.06697 1
 4 -1 10 19.3298 3.52218 3
 -4 -1 -10 14.0985 3.73796 3
 4 -1 10 13.0072 3.26911 1
 -4 1 -10 17.5114 3.41879 1
 -4 1 -10 18.413 4.25264 3
 4 1 10 11.9363 3.33149 1
 5 -1 10 19.9113 3.85276 1
 5 -1 10 14.0216 3.69369 3
 -5 -1 -10 19.3898 4.95665 3
 -5 -1 -10 21.8015 4.78537 1
 -5 1 -10 26.2734 4.52016 1
 -5 1 -10 14.7632 5.30743 3
 5 1 10 20.6864 4.05391 1
 -6 -1 -10 -1.6464 5.75442 3
 6 -1 10 -2.5025 4.36645 1
 6 -1 10 15.2669 4.55357 3
 -6 -1 -10 7.12279 5.72224 1
 6 1 10 0.91717 4.61117 1
 -6 1 -10 9.42856 6.12623 3
 7 -1 10 -2.6764 5.80854 1
 -7 -1 -10 1.66943 6.93116 1
 -7 -1 -10 3.81337 7.90032 3
 7 -1 10 8.24397 5.06379 3
 7 1 10 -4.0012 5.75067 1
 -7 1 -10 10.5879 7.90486 3
 -8 -1 -10 -4.973 8.13479 2
 -8 -1 -10 2.54511 10.6733 3
 8 -1 10 -8.4177 7.92239 1
 -8 1 -10 -11.458 9.22254 3
 8 1 10 3.14478 8.11565 1
 -9 -2 10 59.745 10.4937 2
 9 -2 -10 41.185 8.93288 1
 9 -2 -10 32.4436 9.12702 3
 -9 -2 10 52.2412 11.0642 3
 -9 2 10 50.1753 11.8048 3
 -9 2 10 57.9602 9.39106 2
 9 2 -10 73.2532 8.2207 1
 8 -2 -10 46.534 7.29135 3
 8 -2 -10 62.0743 8.29678 1
 -8 -2 10 71.1561 8.83114 3
 -8 -2 10 60.6691 7.9365 2
 -8 2 10 46.1717 7.12816 2
 8 2 -10 53.9972 6.48835 1
 -8 2 10 60.3231 9.18336 3
 7 -2 -10 19.8115 5.27793 3
 -7 -2 10 20.3853 6.08303 3
 -7 -2 10 29.6448 5.78167 2
 -7 2 10 26.9771 6.6628 3
 7 2 -10 25.3484 4.93078 1
 -7 2 10 8.59441 5.06728 2
 -6 -2 10 456.805 11.9428 3
 -6 -2 10 409.772 13.4708 2
 6 -2 -10 441.276 12.0261 3
 -6 2 10 415.977 13.6819 2
 -6 2 10 449.789 12.9132 3
 6 2 -10 424.313 13.7266 1
 5 -2 -10 66.7491 5.74041 3
 -5 -2 10 72.2717 5.69514 3
 -5 -2 10 59.7623 6.20516 2
 5 2 -10 67.4951 4.63607 3
 -5 2 10 65.6795 6.25529 2
 5 2 -10 70.5591 6.15491 1
 5 2 -10 75.2193 7.79097 2
 4 -2 -10 534.464 11.8837 3
 -4 -2 10 546.151 13.7786 2
 -4 -2 10 537.343 10.881 3
 -4 2 10 539.514 13.699 2
 4 2 -10 514.034 13.8977 2
 3 -2 -10 801.768 15.6956 3
 -3 -2 10 803.538 18.0133 2
 -3 -2 10 820.833 14.3441 3
 -3 2 10 830.345 17.8441 2
 3 2 -10 793.982 18.1208 2
 -2 -2 10 1260.42 25.288 2
 2 2 -10 1211.82 25.2753 2
 -2 2 10 1251.59 24.7211 2
 -1 -2 10 3847.59 72.9561 2
 1 2 -10 3942.76 73.0099 2
 -1 2 10 3987.79 72.0064 2
 0 -2 -10 2.57384 1.48448 2
 0 -2 10 -0.3137 1.1721 3
 0 2 -10 -2.2141 1.38905 3
 0 2 -10 3.26382 2.19575 2
 0 2 10 0.06183 1.36257 2
 -1 -2 -10 426.607 10.8833 1
 1 -2 10 428.426 8.72961 3
 -1 -2 -10 425.804 8.57775 2
 -1 2 -10 421.556 10.5315 2
 -1 2 -10 431.638 9.43524 1
 -1 2 -10 419.598 8.78819 3
 2 -2 10 166.375 5.44086 3
 -2 -2 -10 169.334 6.79476 1
 -2 2 -10 166.316 5.143 1
 -2 2 -10 176.256 5.96979 3
 2 2 10 159.169 6.27281 1
 3 -2 10 153.941 5.97123 3
 3 -2 10 162.899 5.59448 1
 -3 -2 -10 156.674 6.69577 3
 -3 -2 -10 156.699 7.0547 1
 -3 2 -10 155.825 6.89311 3
 -3 2 -10 154.188 5.58168 1
 3 2 10 157.627 6.66319 1
 -4 -2 -10 236.528 8.99308 3
 4 -2 10 229.099 7.78664 1
 -4 -2 -10 232.307 9.1956 1
 4 -2 10 242.936 8.00974 3
 -4 2 -10 240.273 7.88479 1
 4 2 10 238.154 8.97169 1
 -4 2 -10 229.557 8.95761 3
 -5 -2 -10 13.6354 4.83648 3
 5 -2 10 7.78274 3.75114 3
 5 -2 10 12.1673 3.73372 1
 -5 -2 -10 4.44455 4.4336 1
 5 2 10 7.63531 3.99788 1
 -5 2 -10 11.7611 5.05664 3
 -6 -2 -10 1.55164 5.90553 3
 6 -2 10 -4.8727 4.32787 1
 -6 -2 -10 10.8563 5.94649 1
 6 -2 10 -4.1879 4.23617 3
 -6 2 -10 4.49529 6.38174 3
 6 2 10 3.80172 4.75776 1
 -7 -2 -10 23.3437 6.52734 2
 7 -2 10 25.0272 5.50399 3
 -7 -2 -10 20.7777 7.80852 1
 -7 -2 -10 13.4222 8.07354 3
 7 -2 10 3.74501 5.9955 1
 7 2 10 6.8572 6.05158 1
 -7 2 -10 21.918 7.76995 3
 -8 -2 -10 11.65 10.2398 3
 8 -2 10 17.3941 7.0586 3
 -8 -2 -10 -6.5433 8.12159 2
 8 -2 10 -0.0625 7.9353 1
 -8 2 -10 7.17351 9.82001 3
 8 2 10 -7.0547 8.04088 1
 -9 -3 10 10.4922 10.9797 3
 9 -3 -10 4.31119 8.79943 3
 -9 -3 10 -10.035 9.11281 2
 9 -3 -10 17.0195 9.29027 1
 9 3 -10 7.72186 6.64507 1
 -9 3 10 -20.988 7.98817 2
 -8 -3 10 21.8028 8.08925 3
 -8 -3 10 18.8967 7.24892 2
 8 -3 -10 17.3334 6.55441 3
 8 3 -10 12.5227 5.72628 1
 -8 3 10 4.13671 6.56999 2
 -7 -3 10 3.05031 5.34462 2
 7 -3 -10 4.92674 5.3238 3
 -7 -3 10 -0.6121 5.70835 3
 7 3 -10 -3.5902 4.13818 1
 -7 3 10 -6.586 4.79022 2
 6 -3 -10 7.09044 4.45666 3
 -6 -3 10 12.1949 4.73628 3
 -6 -3 10 7.77484 4.42036 2
 6 3 -10 12.6081 4.12812 1
 -6 3 10 6.4141 4.41118 2
 5 -3 -10 140.92 7.01853 3
 -5 -3 10 149.472 6.71261 3
 -5 -3 10 147.715 7.88085 2
 5 3 -10 151.626 7.77898 1
 5 3 -10 157.051 9.16661 2
 -5 3 10 151.967 8.15263 2
 4 -3 -10 3.75781 2.93584 3
 -4 -3 10 5.0334 2.92304 2
 -4 -3 10 7.63192 2.67671 3
 4 3 -10 7.71243 3.49235 2
 -4 3 10 3.64959 3.01678 2
 4 3 -10 3.72284 2.81654 1
 -2 -3 10 434.993 11.2241 2
 -2 3 10 441.988 10.517 2
 2 3 -10 436.974 11.4908 2
 -1 -3 10 553.214 13.2244 2
 1 3 -10 553.176 13.3712 2
 -1 3 10 589.036 12.0233 2
 0 -3 10 65.0106 2.67737 3
 0 -3 -10 66.0778 4.44665 1
 0 3 -10 62.5066 4.93328 2
 0 3 10 60.7796 2.67038 2
 2 -3 10 37.7935 3.74864 3
 -2 -3 -10 43.8346 4.79389 1
 -2 3 -10 45.4148 4.52814 3
 2 3 10 39.6289 4.039 1
 -2 3 -10 37.8976 2.63031 1
 -3 -3 -10 70.2849 5.95968 1
 -3 -3 -10 70.909 3.4916 2
 3 -3 10 81.0237 3.85676 1
 3 -3 10 82.2499 4.96197 3
 -3 3 -10 80.9231 3.91644 1
 -3 3 -10 76.7183 5.8201 3
 3 3 10 81.2921 5.28268 1
 5 -3 10 4.46676 3.3626 1
 -5 -3 -10 3.15133 4.73565 1
 -5 -3 -10 6.79106 3.62668 2
 5 -3 10 13.0186 3.97343 3
 -5 -3 -10 8.6621 5.22324 3
 5 3 10 -2.2597 3.7407 1
 -5 3 -10 8.21172 5.35962 3
 -6 -3 -10 12.5603 6.24745 3
 6 -3 10 14.5077 5.00977 3
 6 -3 10 1.64267 4.1939 1
 -6 -3 -10 1.70554 4.91252 2
 -6 -3 -10 15.0739 6.24023 1
 -6 3 -10 8.2369 6.59968 3
 6 3 10 -2.832 4.34295 1
 7 -3 10 -9.2446 4.86676 3
 -7 -3 -10 3.60512 8.04573 3
 7 -3 10 -7.5686 5.66764 1
 -7 -3 -10 -7.2646 6.04828 2
 -7 -3 -10 7.64031 7.93975 1
 7 3 10 -5.7821 5.53518 1
 -7 3 -10 0.19689 8.18933 3
 -8 -3 -10 -18.352 9.97164 3
 8 -3 10 8.16892 6.81255 3
 8 -3 10 -10.141 7.89121 1
 -8 -3 -10 -12.712 8.49635 2
 -8 -3 -10 0.39118 10.3096 1
 -8 3 -10 -21.925 10.329 3
 8 3 10 8.84829 8.39532 1
 -8 -4 10 116.424 9.92894 3
 -8 -4 10 125.693 11.1263 2
 8 -4 -10 139.799 12.2864 3
 8 4 -10 117.589 10.8155 1
 -8 4 10 124.795 10.6288 2
 7 -4 -10 10.2078 5.85834 3
 -7 -4 10 0.12724 6.28477 3
 -7 -4 10 7.15849 5.87205 2
 7 4 -10 5.53307 5.18481 1
 -7 4 10 -2.2428 5.1464 2
 -6 -4 10 217.111 9.26253 3
 -6 -4 10 201.063 10.1577 2
 6 -4 -10 198.723 9.67926 3
 6 4 -10 186.385 9.7422 1
 -6 4 10 192.272 10.625 2
 6 4 -10 211.549 12.1944 2
 5 -4 -10 5.94358 3.96102 3
 -5 -4 10 2.95142 3.52603 2
 -5 -4 10 6.88269 3.68487 3
 5 4 -10 6.36404 3.57675 1
 5 4 -10 7.50756 4.90735 2
 -5 4 10 3.97369 4.15712 2
 -4 -4 10 331.842 7.99604 3
 4 -4 -10 344.592 9.83507 3
 -4 -4 10 343.36 10.7663 2
 -4 4 10 341.162 10.922 2
 4 4 -10 343.902 10.8027 1
 4 4 -10 339.164 11.3033 2
 -3 -4 10 824.021 18.9817 2
 3 -4 -10 825.74 17.1066 3
 -3 -4 10 795.968 14.8211 3
 3 4 -10 840.65 19.2485 2
 -3 4 10 837.517 18.458 2
 3 4 -10 876.594 19.2432 1
 -2 -4 10 362.593 10.223 2
 2 4 -10 366.059 10.6199 2
 2 4 -10 363.378 9.68365 1
 -2 4 10 363.02 9.3949 2
 -1 -4 10 109.07 3.15118 3
 -1 -4 10 109.278 5.42702 2
 1 4 -10 102.502 6.0771 2
 1 4 -10 104.668 4.46756 1
 -1 4 10 103.262 4.27759 2
 -1 -4 -10 800.243 18.6459 1
 1 -4 10 791.916 15.1691 3
 -1 4 -10 794.084 18.0775 2
 -1 4 -10 812.239 15.3198 3
 -2 -4 -10 181.541 7.6757 1
 2 -4 10 194.916 6.30217 3
 -2 4 -10 189.78 6.7741 3
 2 4 10 198.241 7.38051 1
 -3 -4 -10 82.0326 6.44687 1
 3 -4 10 76.4722 5.53805 3
 -3 4 -10 76.2778 6.54274 3
 3 4 10 83.5698 5.43827 1
 -4 -4 -10 246.264 9.82002 3
 4 -4 10 234.635 7.05379 1
 4 -4 10 249.143 8.95522 3
 -4 -4 -10 233.572 10.1949 1
 -4 -4 -10 249.525 6.70937 2
 4 4 10 250.896 9.60462 1
 -4 4 -10 245.612 9.92143 3
 5 -4 10 -4.3663 2.97769 1
 5 -4 10 -0.7366 3.93012 3
 -5 -4 -10 -2.5972 4.62982 1
 -5 -4 -10 -1.0786 3.37655 2
 -5 -4 -10 2.3644 5.26286 3
 -5 4 -10 -3.4913 5.57848 3
 5 4 10 1.10244 3.72372 1
 -6 -4 -10 68.2609 6.14401 2
 6 -4 10 65.4987 7.46515 1
 -6 -4 -10 64.9817 8.03522 3
 6 -4 10 62.4743 6.15582 3
 -6 -4 -10 75.1905 8.09313 1
 6 4 10 66.9343 7.19078 1
 -6 4 -10 73.0285 8.56602 3
 -7 -4 -10 9.10372 8.22463 3
 7 -4 10 4.62681 5.8496 1
 -7 -4 -10 -0.1433 6.49214 2
 7 -4 10 6.38507 6.24118 3
 -7 -4 -10 4.36489 8.27324 1
 7 4 10 -9.4616 6.18041 1
 -7 4 -10 18.2278 9.14215 3
 -8 -4 -10 28.1538 11.3153 1
 -8 -4 -10 15.2471 11.51 3
 8 -4 10 5.35901 7.82093 3
 -8 -4 -10 5.64664 8.36447 2
 8 -4 10 5.06824 8.05154 1
 8 4 10 -20.201 8.49128 1
 -8 4 -10 9.84862 11.9147 3
 -8 -5 10 7.65191 8.20756 2
 8 -5 -10 3.78354 8.6409 3
 -8 -5 10 13.8894 9.34687 3
 -8 5 10 10.1448 8.05484 2
 8 5 -10 7.91765 7.25928 1
 7 -5 -10 70.1797 8.19897 3
 -7 -5 10 93.967 8.20314 3
 -7 -5 10 82.9485 8.65 2
 7 5 -10 74.9037 7.84565 1
 -7 5 10 80.7332 8.47871 2
 6 -5 -10 -1.2213 4.88169 3
 -6 -5 10 -3.3464 4.84587 2
 -6 -5 10 -0.2865 4.84839 3
 6 5 -10 3.54468 4.5644 1
 -6 5 10 -0.4448 5.62861 2
 6 5 -10 1.7386 6.22183 2
 -5 -5 10 8.85196 3.95974 2
 -5 -5 10 7.11089 3.84783 3
 5 -5 -10 3.14692 4.30641 3
 5 5 -10 7.39717 5.14936 2
 5 5 -10 0.65847 4.04796 1
 -4 -5 10 57.7642 55.0085 4
 -4 -5 10 -1.5522 3.20747 2
 -4 -5 10 3.26543 2.72811 3
 4 -5 -10 3.44987 3.50842 3
 4 5 -10 1.45823 4.08628 2
 4 5 -10 -0.1417 3.19225 1
 3 -5 -10 201.164 7.67096 3
 -3 -5 10 239.649 53.5375 4
 -3 -5 10 215.248 8.36194 2
 -3 -5 10 206.374 5.63535 3
 3 5 -10 194.046 7.89513 1
 3 5 -10 217.084 9.22094 2
 -2 -5 10 35.428 3.91342 2
 2 5 -10 32.977 4.06696 2
 2 5 -10 33.8563 3.41891 1
 -1 -5 10 34.9868 2.93615 3
 1 5 -10 31.6188 3.67032 1
 1 5 -10 33.2598 3.89857 2
 0 -5 10 448.721 9.44977 3
 0 -5 -10 455.128 12.2157 1
 0 5 -10 445.7 12.3462 2
 0 5 -10 455.733 9.67923 1
 0 5 10 450.708 9.23877 2
 -1 -5 -10 211.902 8.21382 1
 1 -5 10 212.722 6.501 3
 -1 5 -10 214.188 8.51272 2
 2 -5 10 48.34 4.8106 3
 -2 -5 -10 53.9193 17.5903 4
 -2 -5 -10 41.6935 4.38037 1
 -2 5 -10 47.4481 4.22823 3
 2 5 10 48.5936 4.8129 1
 -3 -5 -10 4.26779 3.92289 1
 3 -5 10 6.09611 3.59351 3
 -3 5 -10 2.65426 4.08045 3
 3 5 10 2.24476 2.83082 1
 -4 5 -10 -2.1556 4.89371 3
 -5 -5 -10 103.019 9.97811 3
 5 -5 10 107.902 5.84776 1
 5 -5 10 115.475 8.76278 3
 -5 -5 -10 125.553 9.9518 1
 -5 -5 -10 104.447 6.09486 2
 5 5 10 115.812 8.24924 1
 -5 5 -10 116.386 10.647 3
 6 -5 10 9.34503 5.27971 3
 -6 -5 -10 -5.1346 4.52437 2
 -6 -5 -10 5.35574 7.21183 3
 -6 -5 -10 11.5814 6.19925 1
 6 -5 10 -0.054 4.14814 1
 6 5 10 3.72836 4.82458 1
 -6 5 -10 9.81705 7.98109 3
 7 -5 10 6.89406 5.81553 1
 -7 -5 -10 13.1687 9.33711 3
 -7 -5 -10 1.9431 6.21075 2
 7 -5 10 13.5753 6.60366 3
 -7 -5 -10 24.0843 9.02602 1
 7 5 10 6.96142 6.61413 1
 -7 5 -10 20.7665 10.1663 3
 -8 -6 10 45.7676 10.8098 2
 -8 -6 10 54.6814 10.5526 3
 8 -6 -10 38.248 9.53367 3
 8 6 -10 42.8243 9.42101 1
 -8 6 10 25.7396 9.60663 2
 -7 -6 10 24.3893 7.44303 3
 -7 -6 10 19.1723 7.5175 2
 7 -6 -10 24.5258 7.44738 3
 -7 6 10 18.8582 7.9617 2
 7 6 -10 29.4399 7.40196 1
 -6 -6 10 119.561 9.14645 3
 6 -6 -10 131.395 10.1107 3
 -6 -6 10 125.461 10.5017 2
 6 6 -10 122.634 10.4202 1
 6 6 -10 149.255 13.8815 2
 5 -6 -10 58.3044 6.24466 3
 -5 -6 10 59.9535 6.5684 2
 -5 -6 10 56.6005 5.0448 3
 5 6 -10 51.4799 7.00334 2
 5 6 -10 52.1061 6.36139 1
 -4 -6 10 31.2264 5.07889 2
 -4 -6 10 33.6636 3.84765 3
 4 -6 -10 28.0638 4.57817 3
 4 6 -10 23.1335 4.63382 1
 4 6 -10 25.9608 5.59336 2
 3 -6 -10 75.2238 6.50827 3
 -3 -6 10 74.2876 6.29938 2
 3 6 -10 79.5259 7.94483 2
 3 6 -10 65.4026 6.12936 1
 -2 -6 10 49.9356 5.47969 2
 2 6 -10 49.831 5.08379 1
 2 6 -10 55.0275 5.49972 2
 1 -6 -10 433.755 12.3985 1
 -1 -6 10 438.686 9.55419 3
 1 6 -10 473.726 13.0335 2
 1 6 -10 442.52 10.7393 1
 0 -6 -10 32.7806 3.7941 1
 0 -6 10 43.688 3.50504 3
 0 6 -10 38.1104 2.66327 1
 0 6 -10 37.3878 4.58179 2
 -1 -6 -10 293.738 28.3526 4
 1 -6 10 359.582 9.14736 3
 -1 -6 -10 358.769 11.1427 1
 -1 6 -10 354.918 11.4942 2
 -2 -6 -10 68.8972 6.7791 1
 2 -6 10 70.9475 6.03034 3
 -2 -6 -10 57.4524 20.1238 4
 2 6 10 69.2271 5.58027 1
 3 -6 10 84.7982 6.91143 3
 -3 -6 -10 71.4189 7.63031 1
 -3 6 -10 96.1311 8.22584 3
 3 6 10 73.1242 6.02884 1
 4 -6 10 57.8789 5.82281 3
 -4 -6 -10 53.5278 6.63659 1
 -4 6 -10 59.6817 6.63069 3
 4 6 10 55.9449 5.90266 1
 5 -6 10 0.05936 5.08637 3
 -5 -6 -10 1.64288 5.51909 1
 -5 -6 -10 4.45651 6.14595 3
 -5 -6 -10 5.98007 3.15548 2
 -5 6 -10 1.42478 7.13246 3
 5 6 10 -2.6966 3.76601 1
 -6 -6 -10 23.3103 4.7041 2
 -6 -6 -10 21.2924 8.31078 3
 6 -6 10 25.6776 7.13199 3
 -6 -6 -10 20.9113 7.38464 1
 6 -6 10 25.8518 4.23172 1
 6 6 10 29.1926 5.67695 1
 -6 6 -10 30.5324 9.1552 3
 -7 -6 -10 20.7032 6.45722 2
 -7 -6 -10 40.606 9.25964 1
 -7 -6 -10 24.1518 9.97392 3
 7 -6 10 10.227 5.85015 1
 7 -6 10 23.6898 8.24999 3
 7 6 10 28.3003 7.19219 1
 -7 6 -10 23.8047 11.4733 3
 7 -7 -10 17.5534 7.99509 3
 -7 -7 10 11.715 8.11143 3
 -7 -7 10 4.46736 8.4577 2
 7 7 -10 25.0228 11.3399 2
 7 7 -10 14.6453 8.33266 1
 -6 -7 10 16.6364 6.15274 3
 -6 -7 10 15.2208 7.16438 2
 6 -7 -10 11.1316 6.45111 3
 6 7 -10 9.55077 6.11796 1
 6 7 -10 26.7448 8.95387 2
 -5 -7 10 64.945 7.07447 2
 -5 -7 10 69.396 5.72689 3
 5 -7 -10 62.8772 6.73705 3
 5 7 -10 69.0786 7.43375 1
 5 7 -10 55.4278 8.03532 2
 -4 -7 10 59.5108 6.06395 2
 -4 -7 10 64.6354 6.54257 3
 4 -7 -10 71.335 6.21454 3
 -4 -7 10 2.80371 76.3026 4
 4 7 -10 61.4951 7.3183 2
 4 7 -10 68.5966 7.998 1
 3 -7 -10 0.79462 3.73266 3
 -3 -7 10 0.56205 3.80433 2
 3 7 -10 4.29861 5.19634 2
 3 7 -10 -2.6317 3.4463 1
 2 -7 -10 644.082 48.211 4
 2 7 -10 507.741 15.622 2
 2 7 -10 519.432 13.8019 1
 0 -7 10 146.37 6.42557 3
 0 -7 -10 145.488 7.89398 1
 0 7 -10 157.457 4.5241 1
 0 7 -10 154.162 9.0613 2
 -1 -7 -10 15.8808 4.09113 1
 1 -7 10 28.894 3.97117 3
 -1 -7 -10 30.1749 22.2466 4
 -1 7 -10 26.8084 4.67885 2
 -2 -7 -10 38.2946 23.5297 4
 -2 -7 -10 46.8291 5.69807 1
 2 -7 10 46.3237 5.04127 3
 -3 -7 -10 65.0423 6.54164 1
 3 -7 10 67.8149 6.10068 3
 -3 -7 -10 74.8119 27.87 4
 3 7 10 64.4708 6.67957 1
 -4 -7 -10 16.1295 28.7596 4
 -4 -7 -10 32.4755 6.12466 1
 4 -7 10 27.677 6.17087 3
 4 7 10 21.0838 4.28116 1
 -5 -7 -10 43.4533 7.81957 3
 -5 -7 -10 69.703 7.94455 1
 5 -7 10 48.5636 6.98611 3
 -5 7 -10 44.29 8.69138 3
 5 7 10 38.7741 5.24857 1
 -6 -7 -10 38.2159 4.88457 2
 -6 -7 -10 31.5733 8.19623 1
 6 -7 10 33.7916 7.81521 3
 -6 -7 -10 38.6337 9.49612 3
 -6 7 -10 31.5484 10.4844 3
 6 7 10 33.8393 6.01639 1
 -7 -7 -10 44.4613 9.83165 1
 -7 -7 -10 26.7664 6.83697 2
 -7 -7 -10 10.5946 12.1152 3
 7 -7 10 35.9723 9.86423 3
 -7 7 -10 19.5836 13.1948 3
 7 7 10 13.7327 6.90135 1
 7 -8 -10 9.04614 8.8341 3
 -7 -8 10 -8.0572 9.50147 2
 -7 -8 10 2.11753 8.68563 3
 7 8 -10 15.6855 13.2785 2
 7 8 -10 -4.8045 9.29625 1
 -6 -8 10 67.0006 9.19728 2
 -6 -8 10 50.1617 7.39419 3
 6 -8 -10 50.5027 8.1685 3
 6 8 -10 56.5759 10.4942 2
 6 8 -10 58.3484 9.4411 1
 -5 -8 10 18.4997 96.1466 4
 5 -8 -10 16.5955 6.13777 3
 -5 -8 10 28.9077 6.92127 2
 -5 -8 10 25.5874 5.89612 3
 5 8 -10 31.5351 8.64833 2
 5 8 -10 24.5607 6.98727 1
 -4 -8 10 112.816 96.2295 4
 -4 -8 10 75.4077 7.35135 2
 4 -8 -10 76.0044 6.82037 3
 4 8 -10 66.8808 8.60285 2
 4 8 -10 83.7072 7.35414 1
 -3 -8 10 33.3191 5.74265 2
 3 -8 -10 16.4252 4.94406 3
 3 8 -10 22.4108 4.53416 1
 3 8 -10 30.5981 6.4516 2
 1 -8 -10 -0.1109 3.9076 1
 -1 -8 10 0.59932 3.53405 3
 1 8 -10 2.85301 4.8112 2
 1 8 -10 0.81659 2.79969 1
 1 -8 10 4.32484 3.97065 3
 -1 -8 -10 -2.6454 25.4067 4
 -1 -8 -10 -0.0916 4.31323 1
 -1 8 -10 1.65919 4.92694 2
 2 -8 10 79.504 6.46175 3
 -2 -8 -10 35.2457 28.3758 4
 -2 -8 -10 79.5506 7.37297 1
 -2 8 -10 66.5805 6.91015 2
 -3 -8 -10 22.1548 6.02709 1
 -3 -8 -10 84.796 32.8309 4
 3 -8 10 19.5668 5.67092 3
 3 8 10 20.6503 4.93786 1
 4 -8 10 100.691 10.1709 3
 -4 -8 -10 45.1264 34.3527 4
 -4 -8 -10 80.1119 8.35205 1
 4 8 10 74.1767 8.45053 1
 5 -8 10 29.9195 8.00175 3
 -5 -8 -10 42.8117 7.71966 1
 5 8 10 33.1747 5.40498 1
 6 -8 10 10.6447 8.77513 3
 -6 -8 -10 20.9194 8.75933 1
 -6 -8 -10 23.8152 10.9913 3
 6 8 10 28.6593 6.76819 1
 6 -9 -10 -5.0797 7.94765 3
 -6 -9 10 3.33838 8.9613 2
 -6 -9 10 11.6095 7.80376 3
 -6 -9 10 77.1811 124.632 4
 6 9 -10 17.0348 11.6211 2
 6 9 -10 18.552 8.82406 1
 -5 -9 10 149.902 14.007 2
 -5 -9 10 186.263 122.11 4
 -5 -9 10 145.592 11.4157 3
 5 -9 -10 150.339 11.6521 3
 5 9 -10 186.804 13.5674 1
 5 9 -10 152.443 16.3113 2
 -4 -9 10 5.16265 6.29158 2
 4 -9 -10 7.74171 5.52866 3
 -4 -9 10 -50.261 100.612 4
 4 9 -10 6.18853 5.97224 1
 4 9 -10 4.0796 8.269 2
 2 -9 -10 40.4694 6.02119 1
 2 -9 -10 -4.3494 42.4254 4
 2 9 -10 47.523 7.63664 2
 2 9 -10 52.2202 5.19707 1
 1 -9 -10 49.7527 36.5586 4
 -1 -9 10 9.22657 4.41202 3
 1 -9 -10 -0.9068 4.81925 1
 1 9 -10 6.32749 5.69499 2
 1 9 -10 -2.8723 2.8739 1
 0 -9 -10 13.526 30.2065 4
 0 -9 10 6.11358 4.63905 3
 0 -9 -10 3.7297 5.05604 1
 0 9 10 7.11984 3.73471 2
 0 9 -10 10.2771 5.9675 2
 1 -9 10 81.8031 6.76483 3
 -1 -9 -10 77.6728 7.46051 1
 -1 9 -10 85.8166 8.52373 2
 -2 -9 -10 95.7892 10.569 1
 2 -9 10 114.63 9.70412 3
 -2 9 -10 111.015 11.2567 2
 -3 -9 -10 148.127 12.4861 1
 3 -9 10 141.643 11.1407 3
 -4 -9 -10 -4.0266 40.2802 4
 -4 -9 -10 4.99143 7.09657 1
 4 -9 10 11.9102 7.48106 3
 4 9 10 11.6324 5.47017 1
 -5 -9 -10 42.3887 9.23989 1
 5 -9 10 23.3508 9.37596 3
 5 9 10 32.7199 6.92292 1
 5 -10 -10 -1.2123 7.57458 3
 -5 -10 10 13.7378 9.00675 2
 -5 -10 10 2.66414 7.7837 3
 5 10 -10 5.65666 11.1654 2
 -4 -10 10 -10.155 128.773 4
 4 -10 -10 5.33717 6.61746 1
 4 -10 -10 -3.8724 5.97186 3
 4 10 -10 -1.7688 5.90601 1
 4 10 -10 -15.291 9.31635 2
 3 -10 -10 126.55 11.4953 1
 3 -10 -10 99.6082 10.2046 3
 3 10 -10 135.685 11.5554 2
 3 10 -10 123.247 10.0442 1
 2 -10 -10 51.7085 7.21031 1
 2 10 -10 59.1453 5.76693 1
 2 10 -10 60.2991 9.25721 2
 -1 -10 10 -0.0212 5.33716 3
 1 -10 -10 47.4618 46.4257 4
 1 -10 -10 11.3879 6.03991 1
 1 10 -10 3.7744 7.24627 2
 1 10 -10 -0.0285 3.31653 1
 0 -10 10 -3.4109 5.33435 3
 0 -10 -10 5.94002 6.27395 1
 0 10 10 0.40948 4.4723 2
 0 10 -10 -1.9525 6.87109 2
 -1 -10 -10 7.13011 6.10623 1
 -1 -10 -10 47.7853 40.9408 4
 1 -10 10 2.30162 5.96305 3
 1 10 10 7.68654 3.93871 2
 -1 10 -10 9.29922 7.38681 2
 -2 -10 -10 6.15675 6.99782 1
 -2 -10 -10 4.03544 40.9277 4
 2 -10 10 -5.2945 6.16154 3
 -2 10 -10 0.57871 7.20085 2
 -3 -10 -10 49.8688 9.51966 1
 3 -10 10 40.0937 8.20558 3
 -3 -10 -10 2.66633 41.5524 4
 -3 10 -10 32.9957 9.26421 2
 4 -10 10 -0.2862 8.89031 3
 -4 -10 -10 10.2679 9.64586 1
 4 10 10 18.6249 7.18527 1
 4 -11 -10 -3.4562 8.13709 1
 4 -11 -10 -2.7604 7.20632 3
 4 11 -10 -7.051 11.9776 2
 4 11 -10 -4.6736 6.97492 1
 3 -11 -10 11.8552 7.25444 3
 3 -11 -10 78.8122 61.809 4
 3 -11 -10 38.8918 8.27325 1
 3 11 -10 27.8497 10.7331 2
 3 11 -10 23.5229 6.71188 1
 -2 -11 10 13.8807 6.83094 3
 2 -11 -10 25.7548 7.92509 1
 2 11 -10 21.2727 10.2189 2
 2 11 -10 20.7576 5.28486 1
 1 -11 -10 48.4567 57.6236 4
 -1 -11 10 2.89886 6.33087 3
 1 -11 -10 1.71871 7.59571 1
 1 11 -10 -2.0274 8.6899 2
 -1 11 10 -0.879 5.9437 2
 0 -11 10 57.0705 8.23973 3
 0 -11 -10 63.6639 9.1289 1
 0 11 -10 56.6564 10.7247 2
 0 11 10 54.8188 6.39623 2
 -1 -11 -10 79.2903 10.2723 1
 1 -11 10 86.5484 9.078 3
 -1 -11 -10 4.13207 48.8989 4
 1 11 10 91.0957 7.9578 2
 -1 11 -10 81.2283 11.4465 2
 2 -11 10 35.8906 8.48588 3
 -2 -11 -10 27.4761 9.62456 1
 -2 11 -10 53.5535 11.2845 2
 3 -11 10 2.51325 9.23194 3
 -3 -11 -10 16.6392 10.8252 1
 -3 -11 -10 10.5155 54.8494 4
 -3 11 -10 -7.4183 9.79553 2
 -2 -12 10 -0.4921 8.34416 3
 2 -12 -10 2.25248 9.52111 1
 2 12 -10 -1.8984 5.736 1
 2 12 -10 -2.9213 11.8466 2
 -1 -12 10 20.9208 8.26311 3
 1 -12 -10 21.2085 9.29023 1
 1 12 -10 15.3414 11.1394 2
 -1 12 10 21.8442 8.02108 2
 0 -12 10 5.10043 8.5788 3
 0 -12 -10 6.86191 9.51273 1
 0 12 10 10.0745 6.96654 2
 0 12 -10 -4.1951 11.3777 2
 1 -12 10 3.52005 9.44129 3
 -1 -12 -10 1.88241 10.2803 1
 1 12 10 0.81703 5.88201 2
 -1 12 -10 10.1018 11.8804 2
 -9 0 11 -1.5545 10.4164 3
 -9 0 11 13.5863 8.00357 2
 9 0 -11 -2.7781 8.41587 3
 9 0 -11 -3.0895 6.65385 1
 -8 0 11 17.8482 6.39514 2
 8 0 -11 5.00598 5.91686 3
 -8 0 11 -3.6032 7.6968 3
 8 0 -11 -11.261 4.73368 1
 7 0 -11 6.28274 4.54348 3
 -7 0 11 -3.9693 5.66675 3
 -7 0 11 9.30714 5.138 2
 7 0 -11 5.87858 4.08635 1
 -6 0 11 2.15149 4.53319 3
 6 0 -11 1.33909 3.53608 3
 -6 0 11 1.80096 4.19882 2
 -5 0 11 2.10899 3.52196 3
 5 0 -11 -5.9937 2.54489 3
 -5 0 11 -2.7159 2.90895 2
 4 0 -11 -1.6721 2.16721 3
 -4 0 11 4.66525 2.73605 2
 3 0 -11 -0.4586 1.79723 3
 -3 0 11 1.69461 2.5499 2
 3 0 -11 1.69821 2.76789 2
 -2 0 11 -1.7779 2.07072 2
 2 0 -11 -0.6426 2.21152 2
 2 0 -11 -1.8871 1.373 3
 1 0 -11 4.03528 2.19564 2
 -1 0 11 -1.5719 1.98157 2
 0 0 -11 3.09732 1.98479 2
 0 0 11 -1.7532 1.68806 2
 -1 0 -11 2.21362 1.70477 1
 -1 0 -11 -1.9398 1.97167 2
 -2 0 -11 -1.4119 2.11922 1
 -2 0 -11 -0.4498 2.22984 3
 -3 0 -11 1.96598 2.99293 3
 -3 0 -11 -1.1631 2.71174 1
 3 0 11 2.14831 2.2035 1
 -4 0 -11 3.23694 3.33803 1
 4 0 11 0.76539 2.99541 1
 -4 0 -11 0.53366 3.79508 3
 -5 0 -11 6.84419 4.26858 1
 -5 0 -11 -5.2479 4.75749 3
 5 0 11 -2.6463 3.5016 1
 6 0 11 -5.0924 4.51427 1
 -6 0 -11 -3.0541 5.29858 1
 -6 0 -11 11.7247 6.2337 3
 7 0 11 -1.2444 5.80345 1
 -7 0 -11 -5.1791 7.92568 3
 8 0 11 3.19864 8.13203 1
 -8 0 -11 -4.5248 10.6364 3
 9 -1 -11 90.9799 10.189 3
 9 -1 -11 72.4648 9.8041 1
 -9 -1 11 74.105 10.2013 2
 -9 -1 11 74.4818 11.4304 3
 -9 1 11 66.2282 9.51749 2
 -9 1 11 79.8131 11.7515 3
 9 1 -11 71.9824 8.42397 1
 8 -1 -11 183.153 12.0843 1
 -8 -1 11 218.845 12.6382 2
 8 -1 -11 187.589 11.6209 3
 -8 -1 11 163.897 13.3902 3
 -8 1 11 177.332 14.0293 3
 8 1 -11 199.041 11.2956 1
 8 1 -11 172.383 11.5806 3
 -8 1 11 198.188 13.4854 2
 -7 -1 11 64.8901 6.94619 3
 7 -1 -11 70.2462 6.40793 3
 -7 -1 11 95.0147 9.18049 2
 -7 1 11 70.6742 7.32146 3
 -7 1 11 79.5108 7.37366 2
 7 1 -11 73.8283 6.19947 3
 7 1 -11 73.7222 7.87794 1
 6 -1 -11 357.738 10.5073 3
 -6 -1 11 356.631 12.4969 2
 -6 -1 11 384.296 11.1782 3
 -6 1 11 341.305 12.5219 2
 -6 1 11 373.167 11.6722 3
 6 1 -11 375.788 10.1881 3
 -5 -1 11 12.2763 3.55764 2
 -5 -1 11 13.5461 3.5645 3
 5 -1 -11 15.0384 3.28002 3
 -5 1 11 18.3011 3.96805 2
 5 1 -11 16.9829 3.04376 3
 -4 -1 11 334.838 7.97814 3
 4 -1 -11 327.959 8.28259 3
 -4 -1 11 331.927 10.1331 2
 4 1 -11 328.716 7.52434 3
 4 1 -11 331.606 10.5988 2
 -4 1 11 334.273 10.2242 2
 3 -1 -11 123.073 4.50534 3
 -3 -1 11 116.242 5.63881 2
 -3 1 11 112.478 5.679 2
 3 1 -11 117.341 3.57891 3
 3 1 -11 117.112 6.13843 2
 2 -1 -11 669.842 14.6439 2
 -2 -1 11 656.19 14.8687 2
 2 1 -11 643.873 14.8816 2
 -2 1 11 666.967 14.577 2
 2 1 -11 671.013 11.3898 3
 -1 -1 11 2454.53 46.4781 2
 1 -1 -11 2438.91 45.8556 2
 1 1 -11 2450.21 46.3926 2
 -1 1 11 2457.28 45.9092 2
 0 -1 11 152.968 5.48248 2
 0 -1 -11 157.722 4.85051 2
 0 1 11 148.579 4.82607 2
 0 1 -11 154.077 4.00931 3
 0 1 -11 158.202 5.74079 2
 -1 -1 -11 842.331 18.7054 1
 -1 -1 -11 852.616 16.9562 2
 -1 1 -11 888.46 15.8781 3
 -1 1 -11 859.009 17.9288 2
 -1 1 -11 849.78 18.0063 1
 -2 -1 -11 80.0941 4.93706 3
 -2 -1 -11 76.7432 5.01867 1
 2 1 11 81.2701 4.62423 1
 -2 1 -11 86.999 4.62564 3
 -2 1 -11 69.2199 4.2688 1
 3 -1 11 123.856 5.51196 1
 -3 -1 -11 122.048 6.39733 3
 3 -1 11 124.882 5.48153 3
 -3 -1 -11 129.769 6.49443 1
 -3 1 -11 128.727 5.82452 1
 3 1 11 135.337 6.08433 1
 4 -1 11 263.795 8.74791 1
 -4 -1 -11 245.918 9.37166 1
 4 -1 11 249.419 8.28908 3
 -4 -1 -11 242.097 8.88241 3
 4 1 11 242.385 9.19085 1
 -4 1 -11 251.373 9.22621 3
 -4 1 -11 244.732 8.5972 1
 -5 -1 -11 4.41624 4.94928 3
 5 -1 11 2.84033 3.56232 3
 5 -1 11 2.21218 3.43071 1
 -5 -1 -11 5.62477 4.54576 1
 -5 1 -11 2.57905 4.16006 1
 -5 1 -11 -9.7713 4.77633 3
 5 1 11 -1.131 4.01044 1
 -6 -1 -11 99.4529 8.30297 3
 -6 -1 -11 116.423 10.9951 1
 6 -1 11 101.087 8.12657 3
 6 -1 11 119.298 8.81903 1
 6 1 11 99.3208 8.99399 1
 -6 1 -11 106.047 9.83545 1
 -6 1 -11 141.425 10.6139 3
 -7 -1 -11 33.0633 8.51644 3
 -7 -1 -11 36.384 8.12876 1
 7 -1 11 12.176 6.46024 1
 7 1 11 26.8395 6.97153 1
 -7 1 -11 37.6596 8.9634 3
 -8 -1 -11 26.3303 11.0991 3
 8 -1 11 22.4316 8.67709 1
 8 1 11 15.3218 8.52752 1
 -8 1 -11 1.24358 10.5529 3
 9 -2 -11 15.756 8.57446 1
 -9 -2 11 22.0815 10.7032 3
 -9 -2 11 24.6445 9.0012 2
 9 -2 -11 16.6438 8.79791 3
 -9 2 11 18.7924 11.3991 3
 -9 2 11 23.2264 8.29983 2
 9 2 -11 2.20142 6.8901 1
 8 -2 -11 38.2863 7.15508 1
 8 -2 -11 22.6529 6.79383 3
 -8 -2 11 24.0479 6.54993 2
 -8 -2 11 24.301 8.02343 3
 8 2 -11 7.41938 5.37535 1
 -8 2 11 22.8785 8.6367 3
 -8 2 11 24.9929 7.18632 2
 -7 -2 11 3.78993 4.90323 2
 7 -2 -11 0.93699 4.98328 3
 -7 -2 11 6.15348 5.90261 3
 7 2 -11 2.07807 4.03843 1
 -7 2 11 5.2253 5.45126 2
 -6 -2 11 51.5689 5.43865 3
 -6 -2 11 60.2058 6.0478 2
 6 -2 -11 51.6504 5.1654 3
 -6 2 11 37.5379 5.28802 2
 6 2 -11 42.7755 5.16304 1
 5 -2 -11 27.793 4.08237 3
 -5 -2 11 26.8496 4.20813 2
 -5 -2 11 33.0611 3.98317 3
 -5 2 11 24.6336 4.49516 2
 5 2 -11 25.9595 5.13269 2
 -4 -2 11 2.51164 2.93163 2
 -4 -2 11 4.94386 2.41408 3
 4 -2 -11 3.88829 2.76524 3
 4 2 -11 7.30008 3.58825 2
 -4 2 11 1.0102 2.94818 2
 3 -2 -11 107.728 4.72029 3
 -3 -2 11 111.942 5.83365 2
 -3 -2 11 107.195 3.3422 3
 -3 2 11 124.178 5.96576 2
 3 2 -11 108.928 6.32778 2
 -2 -2 11 458.259 11.5517 2
 -2 2 11 459.213 10.9508 2
 2 2 -11 461.641 11.7108 2
 -1 -2 11 427.756 10.7771 2
 1 -2 -11 422.003 9.90718 2
 -1 2 11 415.569 9.80091 2
 1 2 -11 469.812 11.166 2
 0 -2 -11 236.993 5.79272 2
 0 2 -11 233.431 5.1733 3
 0 2 -11 239.168 7.44562 2
 0 2 11 237.537 5.88343 2
 -1 -2 -11 113.476 3.49207 2
 -1 -2 -11 109.425 5.31322 1
 -1 -2 -11 115.271 10.5981 4
 1 -2 11 101.897 3.93197 3
 -1 2 -11 103.253 4.25155 3
 -1 2 -11 109.149 5.45469 2
 -1 2 -11 104.511 4.0416 1
 -2 -2 -11 62.319 3.31254 2
 2 -2 11 62.3111 3.97839 3
 -2 -2 -11 64.0231 5.07194 1
 -2 2 -11 66.2759 4.73243 3
 2 2 11 61.8874 4.59577 1
 -2 2 -11 61.5814 3.78889 1
 4 -2 11 16.7941 3.5154 3
 4 -2 11 18.003 3.30753 1
 -4 -2 -11 27.282 4.62267 1
 -4 -2 -11 23.8026 4.60814 3
 4 2 11 22.5356 3.97782 1
 -4 2 -11 22.8011 3.53644 1
 -4 2 -11 26.0553 4.94038 3
 5 -2 11 97.1345 7.03711 3
 5 -2 11 92.7532 6.72846 1
 -5 -2 -11 96.3874 8.77689 1
 -5 -2 -11 89.5927 8.27359 3
 -5 2 -11 109.566 8.86278 3
 5 2 11 88.565 7.80345 1
 -5 2 -11 100.556 7.43582 1
 6 -2 11 41.6074 5.32106 3
 -6 -2 -11 45.5442 7.46921 3
 6 -2 11 43.2257 5.5815 1
 -6 -2 -11 48.3754 7.23604 1
 -6 2 -11 41.178 7.41346 3
 6 2 11 38.5235 6.20768 1
 7 -2 11 1.94965 5.97228 1
 -7 -2 -11 3.61783 7.80327 1
 -7 -2 -11 -16.256 7.80622 3
 -7 -2 -11 6.09107 6.18015 2
 7 -2 11 11.9052 5.58394 3
 -7 2 -11 16.4366 7.99424 3
 7 2 11 2.10427 6.53648 1
 8 -2 11 0.75158 8.05854 1
 8 -2 11 -3.9968 6.1817 3
 -8 -2 -11 7.18035 10.899 3
 -8 -2 -11 -8.1078 8.14911 2
 -8 2 -11 15.9174 11.0321 3
 8 2 11 -0.1133 8.5802 1
 -9 -3 11 10.0746 10.7743 3
 -9 -3 11 -10.021 8.99941 2
 9 -3 -11 3.07492 9.56495 1
 9 -3 -11 9.61725 8.88059 3
 -9 3 11 9.7051 8.81223 2
 9 3 -11 -1.6043 7.42909 1
 -8 -3 11 56.1477 7.98958 2
 -8 -3 11 57.0977 8.66809 3
 8 -3 -11 58.2973 7.60173 3
 8 3 -11 42.5914 6.43825 1
 -8 3 11 49.4213 8.24904 2
 -7 -3 11 40.7569 6.50985 3
 -7 -3 11 30.7802 5.79873 2
 7 -3 -11 25.1011 5.92057 3
 7 3 -11 10.3515 4.6322 1
 -7 3 11 26.8978 5.94678 2
 6 -3 -11 292.605 10.5807 3
 -6 -3 11 299.696 10.0448 3
 -6 -3 11 314.109 11.7435 2
 -6 3 11 297.789 12.1047 2
 6 3 -11 305.803 11.6371 1
 -5 -3 11 3.38976 3.31423 3
 5 -3 -11 4.14724 3.57576 3
 -5 -3 11 4.50487 3.21041 2
 5 3 -11 3.94928 4.42076 2
 -5 3 11 -0.8035 3.77708 2
 5 3 -11 -4.082 2.98688 1
 -4 -3 11 504.117 10.1879 3
 -4 -3 11 513.581 13.6025 2
 4 -3 -11 501.878 11.8259 3
 4 3 -11 518.114 13.8543 1
 -4 3 11 504.029 13.4987 2
 4 3 -11 487.198 13.7439 2
 3 -3 -11 182.303 6.51559 3
 -3 -3 11 181.198 7.27222 2
 -3 -3 11 190.463 40.0683 4
 -3 -3 11 191.108 4.286 3
 -3 3 11 189.336 7.1332 2
 3 3 -11 177.998 7.73882 2
 -1 -3 11 188.813 6.83478 2
 -1 3 11 197.542 5.74891 2
 1 3 -11 205.596 7.37806 2
 0 -3 -11 199.257 7.08261 1
 0 -3 11 208.864 4.77089 3
 0 3 -11 211.148 4.96186 3
 0 3 11 211.731 5.11322 2
 0 3 -11 209.862 7.48097 2
 1 -3 11 390.428 8.257 3
 -1 -3 -11 385.089 10.6748 1
 -1 3 -11 376.604 10.4433 2
 -1 3 -11 382.406 8.44319 3
 -1 3 -11 377.022 8.39861 1
 2 -3 11 342.222 8.23098 3
 -2 -3 -11 333.759 10.2125 1
 2 3 11 330.327 9.89908 1
 -2 3 -11 327.252 8.55449 3
 -2 3 -11 324.025 7.50134 1
 -3 -3 -11 255.274 9.36314 1
 3 -3 11 257.545 7.92627 3
 -3 3 -11 258.733 6.9022 1
 3 3 11 271.783 9.044 1
 -3 3 -11 265.175 8.65229 3
 4 -3 11 268.844 8.92761 3
 4 -3 11 257.7 7.99524 1
 -4 -3 -11 261.119 7.61339 2
 -4 -3 -11 268.726 9.81756 3
 -4 -3 -11 270.687 10.4466 1
 4 3 11 260.398 9.86804 1
 -4 3 -11 259.659 9.64935 3
 5 -3 11 12.9577 4.26949 3
 -5 -3 -11 10.6244 3.75262 2
 5 -3 11 6.52014 3.48513 1
 -5 -3 -11 10.7114 5.01924 1
 -5 -3 -11 11.8289 5.41931 3
 -5 3 -11 10.1051 5.46779 3
 5 3 11 2.77279 3.95732 1
 -6 -3 -11 10.1686 6.41975 1
 -6 -3 -11 8.45451 6.37975 3
 6 -3 11 3.58359 4.49463 1
 6 -3 11 11.8007 4.81888 3
 -6 -3 -11 3.9991 4.98135 2
 -6 3 -11 3.87355 6.91685 3
 6 3 11 -8.5562 4.86952 1
 -7 -3 -11 5.18467 8.49839 1
 7 -3 11 -0.4431 5.91656 1
 7 -3 11 18.027 6.33984 3
 -7 -3 -11 9.12922 8.71397 3
 -7 -3 -11 -3.3112 6.38358 2
 -7 3 -11 2.04118 8.72674 3
 7 3 11 5.43488 6.76665 1
 8 -3 11 -4.2561 8.06834 1
 -8 -3 -11 14.0504 11.1118 1
 -8 -3 -11 -8.6443 8.68915 2
 8 -3 11 -7.593 7.07322 3
 -8 -3 -11 -9.2918 11.0045 3
 -8 3 -11 -5.9695 11.2077 3
 8 3 11 -0.0071 8.84417 1
 -8 -4 11 19.6022 8.07954 2
 8 -4 -11 16.7968 7.43762 3
 -8 -4 11 4.65966 8.23766 3
 -8 4 11 -5.7557 6.98995 2
 8 4 -11 -4.3063 5.88462 1
 7 -4 -11 15.2557 6.08742 3
 -7 -4 11 12.9659 6.3593 3
 -7 -4 11 22.7052 6.37816 2
 7 4 -11 12.4131 5.33188 1
 -7 4 11 3.90453 5.91416 2
 6 -4 -11 9.45637 4.96729 3
 -6 -4 11 7.30484 4.75486 3
 -6 -4 11 1.84505 4.37326 2
 -6 4 11 7.06253 5.24088 2
 6 4 -11 11.064 5.96624 2
 6 4 -11 0.47907 3.75992 1
 -5 -4 11 137.755 6.53924 3
 -5 -4 11 116.125 7.42479 2
 5 -4 -11 119.883 7.63914 3
 -5 4 11 117.548 8.48914 2
 5 4 -11 135.611 9.33665 2
 5 4 -11 128.722 7.90109 1
 4 -4 -11 -1.247 3.07088 3
 -4 -4 11 1.39622 2.57998 3
 -4 -4 11 46.2448 51.8676 4
 -4 -4 11 4.7802 3.33131 2
 -4 4 11 1.68424 3.45274 2
 4 4 -11 4.33654 3.89017 2
 4 4 -11 -1.3972 3.05327 1
 3 -4 -11 79.9035 5.40473 3
 -3 -4 11 61.5701 3.05585 3
 -3 -4 11 79.5545 5.64925 2
 3 4 -11 74.5599 6.50653 2
 -3 4 11 60.0061 5.43738 2
 3 4 -11 62.8306 5.49815 1
 -2 -4 11 22.2508 42.9505 4
 -2 -4 11 2.09934 2.65161 2
 -2 4 11 0.6424 2.42707 2
 2 4 -11 2.64976 3.3202 2
 2 4 -11 2.18285 2.43369 1
 -1 -4 11 70.7618 4.85924 2
 -1 -4 11 63.7562 2.53558 3
 1 4 -11 80.3783 6.0113 2
 -1 4 11 75.9754 3.97539 2
 0 -4 -11 130.072 5.893 1
 0 -4 11 123.928 3.98247 3
 0 4 -11 117.915 6.59213 2
 0 4 11 127.097 3.55489 2
 -1 -4 -11 314.366 9.8544 1
 1 -4 11 302.609 7.42825 3
 -1 4 -11 316.132 7.7792 3
 -1 4 -11 317.216 9.81698 2
 2 -4 11 63.0744 4.53323 3
 -2 -4 -11 62.5598 5.75208 1
 -2 4 -11 65.1731 5.37242 3
 2 4 11 65.0727 4.97396 1
 -3 -4 -11 129.498 7.62155 1
 3 -4 11 136.545 6.48835 3
 -3 4 -11 142.761 7.38646 3
 3 4 11 131.659 6.74574 1
 5 -4 11 13.0441 3.53878 1
 -5 -4 -11 29.7519 5.98205 1
 5 -4 11 25.236 5.15056 3
 -5 -4 -11 12.725 5.84458 3
 -5 -4 -11 17.3589 3.907 2
 -5 -4 -11 3.69324 23.336 4
 5 4 11 17.5122 4.61658 1
 -5 4 -11 23.6835 6.2519 3
 6 -4 11 3.38565 5.25566 3
 -6 -4 -11 -1.0314 6.54203 3
 -6 -4 -11 4.1558 6.29753 1
 -6 -4 -11 3.31948 4.96891 2
 6 -4 11 -5.5928 4.46171 1
 -6 4 -11 3.66954 7.3848 3
 6 4 11 3.23885 5.16672 1
 -7 -4 -11 6.81918 8.72988 3
 -7 -4 -11 7.44231 9.0724 1
 7 -4 11 8.4397 6.31811 3
 7 -4 11 -1.5302 5.66687 1
 -7 -4 -11 1.88095 6.62402 2
 -7 4 -11 -0.7707 9.57038 3
 7 4 11 -10.648 6.46211 1
 -8 -4 -11 30.6107 11.8477 3
 8 -4 11 10.1293 8.02757 1
 8 -4 11 5.79322 8.02995 3
 -8 -4 -11 19.0917 11.6325 1
 -8 -4 -11 27.3712 9.36032 2
 -8 4 -11 13.5867 12.3932 3
 8 4 11 -1.4928 9.25499 1
 -8 -5 11 97.0832 10.7441 2
 -8 -5 11 112.559 10.4144 3
 8 -5 -11 117.192 10.5336 3
 8 5 -11 100.162 9.9765 1
 -8 5 11 84.0141 10.93 2
 7 -5 -11 -2.3381 6.32341 3
 -7 -5 11 9.71025 6.88865 2
 -7 -5 11 9.89348 6.79488 3
 7 5 -11 15.7842 5.70283 1
 -7 5 11 8.90657 6.81014 2
 6 -5 -11 216.75 10.67 3
 -6 -5 11 203.929 9.37963 3
 -6 -5 11 204.101 11.0936 2
 6 5 -11 206.005 11.0641 1
 6 5 -11 231.419 13.5214 2
 -6 5 11 186.084 11.9252 2
 5 -5 -11 4.76815 4.24479 3
 -5 -5 11 0.11038 3.79891 3
 -5 -5 11 -4.5021 3.72822 2
 -5 5 11 -2.2434 4.30674 2
 5 5 -11 -0.3859 5.18577 2
 5 5 -11 1.44078 4.02217 1
 -4 -5 11 292.997 7.54643 3
 -4 -5 11 308.272 10.6802 2
 4 -5 -11 313.305 9.91655 3
 -4 5 11 297.072 10.7155 2
 4 5 -11 290.315 11.283 2
 4 5 -11 299.028 10.4988 1
 -3 -5 11 185.74 7.91931 2
 3 -5 -11 191.707 7.68173 3
 -3 -5 11 187.659 5.19984 3
 3 5 -11 182.689 8.84652 2
 -3 5 11 191.84 7.95675 2
 3 5 -11 176.941 7.63225 1
 -2 -5 11 166.677 7.11954 2
 2 5 -11 165.161 8.01753 2
 2 5 -11 178.111 6.68294 1
 -2 5 11 160.839 6.61011 2
 -1 -5 11 227.389 5.52094 3
 1 5 -11 239.483 6.91717 1
 -1 5 11 225.551 6.59885 2
 1 5 -11 241.652 8.98088 2
 0 -5 11 13.4398 2.41101 3
 0 -5 -11 9.54293 2.76235 1
 0 5 -11 5.79467 3.38666 2
 0 5 11 13.9699 1.68072 2
 0 5 -11 9.29614 1.80944 1
 1 -5 11 332.896 8.56529 3
 -1 -5 -11 407.802 26.2805 4
 -1 -5 -11 345.622 10.7693 1
 -1 5 -11 332.148 10.8563 2
 -2 -5 -11 54.3536 6.10985 1
 2 -5 11 61.56 5.27436 3
 -2 5 -11 74.9346 6.1022 3
 3 -5 11 115.582 6.83931 3
 -3 -5 -11 110.396 7.7999 1
 3 5 11 114.511 6.70205 1
 -3 5 -11 106.935 7.67529 3
 -4 -5 -11 95.8436 8.73986 1
 4 -5 11 95.2216 7.64382 3
 4 5 11 87.8588 6.66464 1
 -4 5 -11 105.649 9.3188 3
 5 -5 11 2.92512 2.83015 1
 -5 -5 -11 8.21884 5.47718 1
 -5 -5 -11 4.45071 3.1217 2
 -5 -5 -11 -1.7932 5.73081 3
 5 -5 11 5.21975 4.87634 3
 -5 5 -11 11.1217 6.68024 3
 5 5 11 7.12001 3.95806 1
 -6 -5 -11 58.3326 8.75739 3
 6 -5 11 62.4554 5.3299 1
 6 -5 11 61.1561 7.47263 3
 -6 -5 -11 74.6607 8.98819 1
 -6 -5 -11 69.0874 5.90932 2
 6 5 11 61.6191 6.77539 1
 -6 5 -11 71.0169 9.42211 3
 -7 -5 -11 -14.796 8.9808 3
 -7 -5 -11 3.28246 8.6119 1
 7 -5 11 -13.271 5.55168 1
 -7 -5 -11 -6.2908 6.20187 2
 7 -5 11 8.33403 7.46098 3
 7 5 11 -5.9762 6.94388 1
 -7 5 -11 6.8319 10.6225 3
 -8 -6 11 19.7973 9.83147 2
 8 -6 -11 16.5592 9.45968 3
 -8 -6 11 16.1927 10.0345 3
 -8 6 11 10.6841 9.86063 2
 8 6 -11 16.5625 8.51223 1
 -7 -6 11 96.2909 8.5573 3
 -7 -6 11 73.44 9.14072 2
 7 -6 -11 97.0448 9.55753 3
 7 6 -11 91.9605 11.9908 2
 -7 6 11 73.3733 9.6902 2
 7 6 -11 79.4639 9.37832 1
 6 -6 -11 23.0559 5.91519 3
 -6 -6 11 21.6995 5.72843 3
 -6 -6 11 13.4758 5.7525 2
 6 6 -11 1.21305 5.76333 1
 6 6 -11 28.9086 7.99947 2
 -6 6 11 6.96603 6.51499 2
 -5 -6 11 26.7695 5.53189 2
 -5 -6 11 25.6083 4.4058 3
 5 -6 -11 16.0834 5.1477 3
 -5 -6 11 -4.7789 75.0798 4
 5 6 -11 16.4471 5.42447 1
 5 6 -11 18.0602 5.95958 2
 4 -6 -11 41.975 4.99651 3
 -4 -6 11 35.9646 4.91915 2
 -4 -6 11 46.3981 69.8895 4
 -4 -6 11 41.4156 3.68836 3
 4 6 -11 34.8321 6.18981 2
 4 6 -11 33.4108 4.88008 1
 -2 -6 11 85.6662 6.17179 2
 2 6 -11 76.0044 5.45157 1
 2 6 -11 84.9279 7.74649 2
 0 -6 -11 253.754 9.11515 1
 0 -6 11 258.613 7.13812 3
 0 6 -11 252.076 9.98357 2
 0 6 11 237.97 5.96556 2
 0 6 -11 247.437 6.04834 1
 1 -6 11 281.611 8.36048 3
 -1 -6 -11 348.609 27.8863 4
 -1 -6 -11 281.673 10.3471 1
 -1 6 -11 279.056 10.6489 2
 -2 -6 -11 57.9572 5.4575 1
 2 -6 11 63.4399 6.12568 3
 -3 6 -11 5.26485 4.93555 3
 4 -6 11 -5.7625 4.57816 3
 -4 -6 -11 -1.9745 4.72619 1
 4 6 11 -0.9548 3.32793 1
 -4 6 -11 1.27558 5.9105 3
 -5 -6 -11 76.0248 7.59107 1
 5 -6 11 77.3797 7.29434 3
 -5 -6 -11 82.9629 8.51368 3
 5 6 11 83.8159 8.00527 1
 -5 6 -11 81.614 8.89408 3
 -6 -6 -11 2.15779 4.23426 2
 -6 -6 -11 -1.1035 6.78153 1
 6 -6 11 1.28783 3.34421 1
 6 -6 11 12.5279 6.61703 3
 -6 -6 -11 4.386 7.98435 3
 6 6 11 -0.2277 4.95056 1
 -6 6 -11 2.87072 9.20524 3
 -7 -6 -11 24.2423 9.4813 1
 7 -6 11 14.3822 5.52688 1
 7 -6 11 21.9058 8.55987 3
 -7 -6 -11 5.68268 6.08369 2
 -7 -6 -11 3.665 10.3478 3
 7 6 11 15.0852 7.36866 1
 -7 6 -11 18.9756 12.1647 3
 7 -7 -11 11.982 8.28078 3
 -7 -7 11 13.9022 8.28954 2
 -7 -7 11 -24.977 113.782 4
 -7 -7 11 19.9718 7.86689 3
 7 7 -11 8.57887 11.2711 2
 7 7 -11 3.90311 7.96998 1
 -7 7 11 5.74372 8.96841 2
 -6 -7 11 66.0323 6.70198 3
 6 -7 -11 59.0563 8.23187 3
 -6 -7 11 54.7852 8.27689 2
 6 7 -11 59.5746 9.50556 2
 6 7 -11 61.2281 8.63012 1
 -5 -7 11 45.2744 6.79085 2
 -5 -7 11 73.7799 84.7028 4
 5 -7 -11 33.3771 6.3737 3
 -5 -7 11 35.1939 4.90767 3
 5 7 -11 36.9729 7.51526 2
 5 7 -11 43.5168 6.7415 1
 -4 -7 11 99.6516 6.53209 3
 4 -7 -11 106.081 8.24096 3
 -4 -7 11 153.312 81.3498 4
 -4 -7 11 103.749 8.56131 2
 4 7 -11 97.8503 8.65516 1
 4 7 -11 93.4135 10.3077 2
 -3 -7 11 68.72 7.43947 2
 3 -7 -11 53.8038 5.43911 3
 3 7 -11 73.3001 7.30574 2
 3 7 -11 69.7646 7.1947 1
 2 7 -11 409.298 13.9229 2
 2 7 -11 413.724 11.5701 1
 1 -7 -11 597.993 16.0315 1
 -1 -7 11 591.55 12.609 3
 1 7 -11 596.933 13.7935 1
 1 7 -11 601.756 16.5604 2
 -1 -7 -11 45.2033 24.4347 4
 1 -7 11 56.4591 4.72479 3
 -1 -7 -11 34.545 5.00566 1
 -1 7 -11 45.8731 5.4523 2
 -2 -7 -11 63.587 6.26397 1
 -2 -7 -11 95.9273 25.1845 4
 2 -7 11 60.1719 5.60688 3
 -2 7 -11 42.4743 6.05812 2
 -3 -7 -11 29.0638 25.9635 4
 3 -7 11 83.6339 7.86503 3
 -3 -7 -11 77.4652 8.5303 1
 3 7 11 81.913 7.01006 1
 -4 -7 -11 6.49249 5.57359 1
 4 -7 11 10.7166 5.56303 3
 4 7 11 4.64062 3.89934 1
 -5 -7 -11 25.2843 8.06717 3
 -5 -7 -11 11.5144 6.67625 1
 5 -7 11 7.24445 6.32001 3
 -5 7 -11 22.8421 8.63302 3
 5 7 11 19.9826 5.48768 1
 -6 -7 -11 77.0401 10.3554 3
 -6 -7 -11 5.39596 40.4217 4
 6 -7 11 73.4448 9.3538 3
 -6 -7 -11 51.1026 8.69693 1
 6 7 11 85.8069 9.8432 1
 -6 7 -11 71.1766 11.5638 3
 -7 -8 11 -3.1206 9.97792 2
 -7 -8 11 -9.1944 8.75764 3
 7 -8 -11 -7.1382 8.81528 3
 7 8 -11 14.172 13.4192 2
 7 8 -11 -2.9384 9.36973 1
 6 -8 -11 -6.9309 7.34349 3
 -6 -8 11 2.95917 6.8193 3
 -6 -8 11 1.98737 7.57219 2
 6 8 -11 15.1231 10.4819 2
 6 8 -11 -9.7644 7.51158 1
 -5 -8 11 146.55 9.38306 3
 -5 -8 11 12.02 105.564 4
 5 -8 -11 158.804 11.2463 3
 -5 -8 11 176.231 12.0525 2
 5 8 -11 164.05 14.7861 2
 5 8 -11 146.334 11.5728 1
 -4 -8 11 111.395 98.064 4
 4 -8 -11 2.86329 4.95855 3
 -4 -8 11 0.62291 5.32003 2
 -4 -8 11 6.51744 4.57095 3
 4 8 -11 2.1416 5.15803 1
 4 8 -11 5.24072 7.25273 2
 -3 -8 11 35.4586 5.59566 2
 3 -8 -11 35.4506 5.60517 3
 3 -8 -11 7.1773 39.9883 4
 3 8 -11 40.9922 7.08763 2
 3 8 -11 45.3223 5.4812 1
 2 -8 -11 569.351 16.3094 1
 2 8 -11 588.347 14.8251 1
 2 8 -11 546.699 17.3603 2
 -1 -8 11 1.25592 3.25284 3
 1 8 -11 -1.6855 2.62252 1
 1 8 -11 9.29369 5.04093 2
 0 -8 11 177.21 7.81003 3
 0 -8 -11 190.682 9.76261 1
 0 8 11 176.857 6.35763 2
 0 8 -11 168.914 10.3611 2
 1 -8 11 16.6059 4.4927 3
 -1 -8 -11 31.0617 26.9645 4
 -1 -8 -11 11.3077 4.97374 1
 -1 8 -11 5.32119 5.16882 2
 2 -8 11 74.4197 6.20982 3
 -2 -8 -11 48.1953 29.3673 4
 -2 -8 -11 75.2693 7.21867 1
 -2 8 -11 55.3291 6.62751 2
 -3 -8 -11 79.5378 33.7246 4
 3 -8 11 103.299 9.48385 3
 -3 -8 -11 109.39 10.1484 1
 3 8 11 129.811 8.5036 1
 -4 -8 -11 14.9561 6.33844 1
 -4 -8 -11 1.35782 34.0882 4
 4 -8 11 7.82479 6.44887 3
 4 8 11 4.4383 4.372 1
 5 -8 11 38.3871 8.03606 3
 -5 -8 -11 37.8425 8.00912 1
 5 8 11 32.6911 6.21776 1
 -6 -8 -11 3.12267 9.09369 1
 -6 -8 -11 13.4113 11.2017 3
 6 -8 11 30.5275 9.73446 3
 6 8 11 32.7303 6.66003 1
 -6 -9 11 3.53582 9.05566 2
 -6 -9 11 -0.564 7.69885 3
 6 -9 -11 7.86566 8.68946 3
 6 9 -11 12.8082 8.49663 1
 6 9 -11 35.2891 12.3653 2
 -5 -9 11 15.9864 8.16944 2
 -5 -9 11 2.907 6.38773 3
 -5 -9 11 -22.385 125.568 4
 5 -9 -11 5.73457 6.78452 3
 5 9 -11 10.6375 9.81064 2
 5 9 -11 7.10888 6.83901 1
 -4 -9 11 28.4065 7.31245 2
 -4 -9 11 24.9982 115.354 4
 4 -9 -11 34.5491 6.78416 3
 4 9 -11 28.9428 8.98039 2
 4 9 -11 33.6784 6.52696 1
 3 -9 -11 169.816 10.3174 3
 3 -9 -11 172.446 10.9251 1
 3 -9 -11 138.791 51.2852 4
 3 9 -11 200.626 10.1113 1
 3 9 -11 189.853 13.9557 2
 2 -9 -11 -4.4938 4.87478 1
 -2 -9 11 2.67787 4.45721 3
 2 -9 -11 42.8605 41.5974 4
 2 9 -11 2.94798 3.94743 1
 2 9 -11 1.93451 6.33024 2
 -1 -9 11 16.57 4.50572 3
 1 -9 -11 34.7078 39.5423 4
 1 -9 -11 12.9527 5.38165 1
 1 9 -11 18.2285 6.7687 2
 1 9 -11 19.7452 3.6054 1
 0 -9 11 40.5659 5.4149 3
 0 -9 -11 35.192 6.27256 1
 0 9 -11 37.7502 7.14488 2
 0 9 11 32.4755 4.11059 2
 -1 -9 -11 5.59522 33.5622 4
 -1 -9 -11 9.25753 5.44405 1
 1 -9 11 7.00839 5.13295 3
 -1 9 -11 3.58836 6.62839 2
 -2 -9 -11 -2.8271 6.12163 1
 -2 -9 -11 25.4247 34.7117 4
 2 -9 11 -2.4431 5.37967 3
 -2 9 -11 -8.4158 5.85572 2
 -3 -9 -11 60.8673 39.7942 4
 3 -9 11 4.33666 6.60603 3
 -3 -9 -11 9.00985 6.79254 1
 4 -9 11 19.6586 7.75946 3
 -4 -9 -11 38.2346 42.255 4
 -4 -9 -11 5.77728 7.5725 1
 4 9 11 20.1062 6.51624 1
 -5 -9 -11 31.1761 9.08584 1
 5 -9 11 19.1939 8.85965 3
 5 9 11 4.6749 5.97178 1
 -5 -10 11 76.2999 8.80044 3
 5 -10 -11 63.3209 9.14449 3
 -5 -10 11 75.9189 11.1358 2
 5 10 -11 70.3847 9.78061 1
 5 10 -11 74.796 13.0483 2
 -4 -10 11 -61.732 127.382 4
 4 -10 -11 16.8715 7.03291 3
 4 -10 -11 4.37381 6.7794 1
 4 10 -11 0.48614 6.48113 1
 4 10 -11 8.76738 9.98894 2
 3 -10 -11 33.6305 7.06233 1
 3 -10 -11 118.033 54.2337 4
 3 -10 -11 28.02 6.71168 3
 3 10 -11 26.3096 6.04787 1
 3 10 -11 37.5904 9.66498 2
 2 -10 -11 36.2054 6.67857 1
 2 -10 -11 22.2902 47.7274 4
 -2 -10 11 29.2497 6.07309 3
 2 10 -11 30.8017 8.77322 2
 2 10 -11 29.5457 5.04237 1
 1 -10 -11 13.1291 6.22719 1
 -1 -10 11 7.05704 5.22642 3
 1 10 -11 4.29737 3.30754 1
 1 10 -11 13.6482 7.77473 2
 0 -10 -11 -31.23 36.5421 4
 0 -10 11 18.0178 6.00272 3
 0 -10 -11 24.15 6.90866 1
 0 10 -11 11.3478 7.8567 2
 0 10 11 19.25 4.65589 2
 -1 -10 -11 -12.565 39.6656 4
 1 -10 11 71.6483 7.54237 3
 -1 -10 -11 61.9067 8.09128 1
 -1 10 -11 71.5157 9.44183 2
 2 -10 11 -3.3708 6.60365 3
 -2 -10 -11 26.9417 42.1955 4
 -2 -10 -11 17.9089 7.60919 1
 -2 10 -11 23.0515 7.97016 2
 3 -10 11 17.4016 8.05774 3
 -3 -10 -11 49.4027 9.03336 1
 -3 -10 -11 33.603 44.761 4
 -3 10 -11 29.7767 8.45765 2
 -4 -10 -11 11.2817 9.25059 1
 -4 -10 -11 -10.351 49.8459 4
 4 -10 11 21.746 9.29567 3
 4 -11 -11 7.83786 7.60141 3
 4 -11 -11 19.9402 9.42216 1
 4 11 -11 3.1353 6.99812 1
 4 11 -11 -3.5716 12.3666 2
 3 -11 -11 7.08125 65.3635 4
 3 -11 -11 18.8989 6.76315 3
 3 -11 -11 41.5042 8.88391 1
 3 11 -11 17.6272 11.0422 2
 3 11 -11 11.7398 6.46046 1
 -2 -11 11 -6.1763 6.65983 3
 2 -11 -11 41.0279 58.7925 4
 2 -11 -11 4.02892 7.46256 1
 2 11 -11 1.83792 5.0546 1
 2 11 -11 -1.1994 9.81744 2
 -1 -11 11 38.4368 7.24238 3
 1 -11 -11 45.0619 8.66794 1
 1 11 -11 36.8405 9.84534 2
 -1 11 11 38.0644 6.46608 2
 0 -11 11 2.78409 7.29047 3
 0 -11 -11 70.7292 54.2746 4
 0 -11 -11 11.4683 7.80973 1
 0 11 11 15.724 5.29374 2
 0 11 -11 -6.4429 9.31722 2
 1 -11 11 6.06028 7.45223 3
 -1 -11 -11 3.19786 8.82104 1
 -1 11 -11 0.32186 9.58148 2
 -2 -11 -11 13.4497 9.37539 1
 2 -11 11 -9.983 7.91433 3
 -2 11 -11 -2.314 10.2426 2
 -3 -11 -11 7.63947 11.2904 1
 -3 -11 -11 -8.547 56.4682 4
 3 -11 11 17.4291 9.72099 3
 -3 11 -11 7.83251 10.0001 2
 -1 -12 11 -2.7483 8.50216 3
 1 -12 -11 10.0679 9.45551 1
 1 12 -11 -0.4362 11.2753 2
 -1 12 11 3.86592 7.60442 2
 0 -12 -11 46.2543 10.3436 1
 0 -12 11 16.4763 9.25688 3
 0 12 11 39.5249 6.90256 2
 0 12 -11 31.6759 12.008 2
 -1 -12 -11 21.918 11.0992 1
 -1 12 -11 11.5298 11.9217 2
 -9 0 12 38.8596 11.237 3
 -9 0 12 55.6577 9.43476 2
 9 0 -12 31.7838 9.13084 3
 9 0 -12 51.2618 8.34575 1
 -8 0 12 184.48 14.1782 3
 -8 0 12 210.234 12.7139 2
 8 0 -12 213.861 11.6275 1
 8 0 -12 183.256 11.6885 3
 -7 0 12 159.228 10.8714 3
 7 0 -12 174.099 9.12446 3
 -7 0 12 203.674 10.9521 2
 -6 0 12 646.955 17.4093 2
 -6 0 12 632.367 15.2242 3
 6 0 -12 636.956 14.4848 3
 -5 0 12 37.2487 4.16992 3
 -5 0 12 33.4001 4.39184 2
 5 0 -12 35.3914 3.55238 3
 4 0 -12 325.819 7.89637 3
 4 0 -12 329.879 10.8319 2
 -4 0 12 344.491 10.3363 2
 -3 0 12 347.98 9.93727 2
 3 0 -12 357.603 10.1983 2
 3 0 -12 347.017 7.49581 3
 2 0 -12 485.483 9.25664 3
 2 0 -12 481.107 11.8268 2
 -2 0 12 494.589 11.7576 2
 1 0 -12 2267.53 42.9504 2
 -1 0 12 2254.94 42.9331 2
 0 0 12 7.37554 2.06897 2
 0 0 -12 5.21274 2.23411 2
 -1 0 -12 2059.88 40.8965 1
 -1 0 -12 2079.76 39.1358 2
 -1 0 -12 2054.78 35.7085 3
 -2 0 -12 540.801 11.8178 3
 -2 0 -12 551.713 13.1916 1
 -3 0 -12 12.4294 3.23489 1
 3 0 12 8.23395 2.68355 1
 -3 0 -12 14.1262 3.37503 3
 -4 0 -12 72.9282 6.99673 3
 4 0 12 62.7625 5.85208 1
 -4 0 -12 79.7741 6.56627 1
 5 0 12 29.1719 4.81281 1
 -5 0 -12 27.4008 5.20759 1
 -5 0 -12 12.8415 5.32062 3
 -6 0 -12 190.219 11.7949 1
 -6 0 -12 160.468 11.3128 3
 6 0 12 145.128 10.3698 1
 -7 0 -12 -5.8466 7.26489 1
 7 0 12 -7.1937 5.75894 1
 -7 0 -12 3.81422 8.60528 3
 -8 0 -12 37.335 11.5914 3
 8 0 12 25.072 9.41716 1
 -9 -1 12 -3.3978 7.65875 2
 9 -1 -12 1.26102 7.60917 1
 -9 -1 12 -3.4542 10.7762 3
 9 -1 -12 6.99489 8.51997 3
 -9 1 12 11.335 8.39441 2
 -9 1 12 14.3657 10.9234 3
 9 1 -12 -11.925 6.28702 1
 -8 -1 12 -2.0212 7.69859 3
 -8 -1 12 -3.958 5.88389 2
 8 -1 -12 7.5966 5.83787 1
 8 -1 -12 6.64536 6.18083 3
 -8 1 12 2.32754 6.20553 2
 -8 1 12 -3.1156 7.99028 3
 8 1 -12 1.06605 5.49042 1
 8 1 -12 2.10887 6.26949 3
 -7 -1 12 16.6839 6.04951 3
 -7 -1 12 21.5344 5.70819 2
 7 -1 -12 21.5805 5.26491 3
 -7 1 12 22.6759 6.33711 3
 7 1 -12 13.7453 5.09934 3
 -7 1 12 23.5001 6.06667 2
 7 1 -12 9.49521 4.69625 1
 -6 -1 12 69.9855 7.65816 2
 -6 -1 12 77.5134 5.82303 3
 6 -1 -12 75.2621 6.68238 3
 6 1 -12 71.3762 6.18971 3
 -6 1 12 89.8069 8.35921 2
 -5 -1 12 72.9254 5.95446 3
 -5 -1 12 68.7506 6.58855 2
 5 -1 -12 83.2666 5.64755 3
 5 1 -12 85.9497 4.94577 3
 -5 1 12 79.7997 7.035 2
 -4 -1 12 12.4596 3.36387 2
 4 -1 -12 16.2128 2.97457 3
 4 1 -12 15.6623 2.26693 3
 4 1 -12 16.2122 3.6452 2
 -4 1 12 18.5815 3.73841 2
 3 -1 -12 7.76063 2.15334 3
 -3 -1 12 9.80472 2.57651 2
 3 1 -12 8.78317 3.14028 2
 3 1 -12 4.63882 1.51303 3
 -3 1 12 6.14282 2.64063 2
 2 -1 -12 34.7266 3.36335 2
 -2 -1 12 32.151 3.44355 2
 2 1 -12 34.6897 3.74929 2
 -2 1 12 33.3374 3.28618 2
 -1 -1 12 191.006 6.60333 2
 1 -1 -12 194.189 6.23404 2
 1 1 -12 215.134 6.95227 2
 -1 1 12 178.023 6.08788 2
 1 1 -12 203.877 4.16912 3
 0 -1 12 468.489 11.2575 2
 0 -1 -12 480.591 10.5658 2
 0 1 -12 473.082 9.14415 3
 0 1 12 484.859 10.6064 2
 0 1 -12 477.5 11.4134 2
 -1 -1 -12 55.8845 4.29046 1
 -1 -1 -12 49.0114 3.55963 2
 -1 1 -12 53.8599 3.60516 3
 -1 1 -12 46.5679 4.53371 2
 -1 1 -12 59.4879 3.80026 1
 -2 -1 -12 2.90858 2.30483 2
 -2 -1 -12 5.21986 2.64336 3
 -2 -1 -12 1.41996 2.62896 1
 -2 1 -12 5.22198 2.66028 3
 -2 1 -12 2.40158 2.23075 1
 -4 -1 -12 3.26336 3.69686 3
 -4 -1 -12 9.1354 4.01444 1
 4 -1 12 0.47198 2.83202 1
 4 1 12 1.46677 3.05457 1
 -4 1 -12 8.35239 4.57907 3
 -4 1 -12 4.56525 3.50678 1
 -5 -1 -12 34.0746 5.68977 1
 -5 -1 -12 29.037 5.78219 3
 5 -1 12 38.4252 4.88988 1
 -5 1 -12 28.7603 5.92385 3
 5 1 12 30.7343 5.0392 1
 -5 1 -12 39.3842 5.22667 1
 -6 -1 -12 12.7527 6.61869 1
 6 -1 12 0.16564 4.85665 1
 -6 -1 -12 -4.5274 6.25404 3
 6 1 12 -1.1274 4.85829 1
 -6 1 -12 14.4304 6.82669 3
 -6 1 -12 2.06948 5.48039 1
 -7 -1 -12 4.07581 8.81747 3
 7 -1 12 -17.826 5.63246 1
 -7 -1 -12 -6.6294 7.42656 1
 -7 1 -12 -3.3105 8.39583 3
 7 1 12 -13.35 6.31447 1
 -8 -1 -12 -1.1826 11.4574 3
 8 -1 12 -1.3438 8.17742 1
 -8 1 -12 -2.2848 11.5762 3
 8 1 12 -9.8709 8.74505 1
 -9 -2 12 19.598 9.19877 2
 9 -2 -12 41.1689 9.57586 1
 -9 -2 12 31.4113 11.0027 3
 9 -2 -12 42.7795 9.46589 3
 -9 2 12 47.262 9.29304 2
 -8 -2 12 28.1159 7.01458 2
 8 -2 -12 26.7679 6.84832 3
 -8 -2 12 32.7241 8.26044 3
 -8 2 12 32.1965 7.62405 2
 8 2 -12 24.8125 6.07705 1
 -7 -2 12 3.08442 5.06079 2
 -7 -2 12 10.7592 5.8988 3
 7 -2 -12 8.93165 4.84924 3
 -7 2 12 4.40384 5.35723 2
 7 2 -12 9.50608 4.54201 1
 -6 -2 12 317.343 10.1991 3
 6 -2 -12 311.767 10.4169 3
 -6 -2 12 312.683 11.7417 2
 -6 2 12 315.456 12.4013 2
 6 2 -12 326.289 11.9913 1
 -5 -2 12 11.4798 3.62349 2
 5 -2 -12 8.60414 3.47251 3
 -5 -2 12 13.3546 3.53434 3
 5 2 -12 12.0558 4.80293 2
 -5 2 12 8.88123 3.81921 2
 4 -2 -12 725.459 15.267 3
 -4 -2 12 749.244 14.0266 3
 -4 -2 12 766.988 17.9057 2
 4 2 -12 718.362 17.9298 2
 -4 2 12 776.615 17.8633 2
 -3 -2 12 124.451 6.24194 2
 3 -2 -12 129.316 5.10709 3
 -3 2 12 126.766 6.18664 2
 3 2 -12 131.458 6.80853 2
 -2 -2 12 123.664 5.644 2
 2 2 -12 118.229 6.30098 2
 -2 2 12 124.831 5.47129 2
 1 -2 -12 1542.86 29.7239 2
 -1 -2 12 1533.55 30.7742 2
 -1 2 12 1535.11 29.7068 2
 1 2 -12 1579.23 30.927 2
 0 -2 -12 68.4355 3.38553 2
 0 2 12 68.8457 3.40137 2
 0 2 -12 76.4462 5.05755 2
 0 2 -12 66.0949 2.98327 3
 -1 -2 -12 754.126 14.8131 2
 1 -2 12 759.631 14.2512 3
 -1 -2 -12 759.648 17.4257 1
 -1 2 -12 756.514 14.358 3
 -1 2 -12 749.464 15.9842 1
 -1 2 -12 769.877 16.8649 2
 2 -2 12 12.6754 2.45289 3
 -2 -2 -12 11.5374 2.92405 1
 -2 -2 -12 16.1512 2.19396 2
 -2 2 -12 13.0707 2.33902 1
 -2 2 -12 15.7139 3.20081 3
 3 -2 12 227.612 7.42579 3
 -3 -2 -12 221.274 8.75216 1
 -3 -2 -12 238.369 8.39365 3
 -3 2 -12 235.024 7.21202 1
 -3 2 -12 234.886 8.22336 3
 3 2 12 219.707 8.15992 1
 4 -2 12 277.083 8.7698 1
 4 -2 12 264.186 8.90158 3
 -4 -2 -12 277.582 10.577 1
 -4 -2 -12 268.133 10.0217 3
 4 2 12 264.151 9.88785 1
 -4 2 -12 271.843 9.8376 3
 -4 2 -12 281.731 8.83823 1
 5 -2 12 2.23905 3.85954 3
 5 -2 12 0.35151 3.56315 1
 -5 -2 -12 -2.071 4.76336 1
 -5 -2 -12 -1.5544 4.84075 3
 -5 2 -12 1.4485 4.04575 1
 5 2 12 3.77647 4.20127 1
 -5 2 -12 3.18865 5.37152 3
 -6 -2 -12 84.8536 8.46399 3
 -6 -2 -12 92.6025 8.66948 1
 6 -2 12 90.3444 8.82033 3
 6 -2 12 75.6352 6.71329 1
 -6 2 -12 83.0424 8.66528 3
 6 2 12 69.9016 7.23321 1
 7 -2 12 19.284 6.48441 1
 -7 -2 -12 33.956 9.24358 1
 -7 -2 -12 13.8805 8.64563 3
 -7 -2 -12 32.5008 7.08288 2
 7 -2 12 40.0868 6.94921 3
 7 2 12 20.5521 7.7306 1
 -7 2 -12 42.4215 9.37986 3
 -8 -2 -12 -0.7589 10.9973 1
 8 -2 12 -7.741 8.11389 1
 -8 -2 -12 21.2402 11.9598 3
 -8 -2 -12 1.62133 8.66765 2
 8 2 12 -0.4677 9.49331 1
 -8 2 -12 -1.1434 10.9394 3
 -8 -3 12 -2.3354 6.60012 2
 -8 -3 12 8.49449 7.946 3
 8 -3 -12 -7.9518 6.33901 3
 -8 3 12 6.23444 7.16771 2
 8 3 -12 -1.0996 5.55899 1
 -7 -3 12 5.70871 5.87633 3
 7 -3 -12 9.1197 5.82509 3
 -7 -3 12 1.88183 5.11681 2
 7 3 -12 0.92183 4.12818 1
 -7 3 12 4.58223 5.65302 2
 -6 -3 12 20.2743 5.00485 2
 -6 -3 12 21.4532 4.79757 3
 6 -3 -12 20.3425 5.03274 3
 -6 3 12 19.9778 5.14713 2
 6 3 -12 14.9063 4.39479 1
 6 3 -12 27.541 6.45775 2
 -5 -3 12 65.1385 6.56478 2
 -5 -3 12 61.0977 4.33276 3
 5 -3 -12 60.0041 5.0522 3
 -5 3 12 59.5123 5.86944 2
 5 3 -12 53.7998 5.94394 2
 5 3 -12 50.504 5.26399 1
 -4 -3 12 25.9996 3.94477 2
 -4 -3 12 20.6866 2.70302 3
 4 -3 -12 21.1537 3.63274 3
 -4 3 12 12.3084 3.87061 2
 4 3 -12 25.3609 4.7045 2
 3 -3 -12 485.821 11.2604 3
 -3 -3 12 490.086 12.9209 2
 3 3 -12 479.758 13.1044 2
 -3 3 12 490.771 12.4947 2
 -2 -3 12 32.4789 34.4571 4
 -2 -3 12 60.2775 4.90745 2
 -2 3 12 63.2954 4.70432 2
 2 3 -12 63.6822 5.75045 2
 -1 -3 12 19.2525 31.5101 4
 -1 -3 12 2.36923 2.03558 2
 -1 3 12 3.0525 2.08173 2
 1 3 -12 6.92542 2.77879 2
 0 -3 12 11.732 1.57452 3
 0 -3 -12 15.7517 2.84907 1
 0 3 -12 14.3322 1.87907 3
 0 3 -12 14.3923 3.0539 2
 0 3 12 14.6889 1.84409 2
 1 -3 12 1.50831 1.86528 3
 -1 -3 -12 2.26257 2.31497 1
 -1 3 -12 0.95578 2.36556 3
 -1 3 -12 2.54102 1.53817 1
 -1 3 -12 6.30179 2.89338 2
 -2 -3 -12 58.0061 5.50008 1
 2 -3 12 53.6869 4.33679 3
 -2 -3 -12 74.9437 13.3484 4
 -2 3 -12 65.1246 5.1535 3
 -2 3 -12 57.7977 3.42447 1
 3 -3 12 61.1193 5.24406 3
 -3 -3 -12 50.2839 4.91273 1
 3 3 12 50.9954 5.25855 1
 -3 3 -12 66.4084 6.24094 3
 -3 3 -12 57.9811 4.04927 1
 -5 -3 -12 -6.1335 5.16611 3
 -5 -3 -12 4.07855 5.21861 1
 5 -3 12 3.51281 4.05886 3
 -5 -3 -12 -5.6454 3.64704 2
 5 -3 12 -2.9122 3.45952 1
 -5 -3 -12 33.9693 22.9811 4
 5 3 12 3.47948 4.41802 1
 -5 3 -12 -1.9904 5.56973 3
 6 -3 12 6.2981 5.39513 3
 6 -3 12 8.51492 4.7538 1
 -6 -3 -12 5.05827 4.98467 2
 -6 -3 -12 5.28516 6.73696 3
 -6 -3 -12 9.62405 6.48704 1
 -6 3 -12 4.02526 7.20632 3
 6 3 12 18.3643 6.09874 1
 -7 -3 -12 17.7951 7.02225 2
 7 -3 12 18.8273 6.95061 1
 7 -3 12 37.0658 7.35729 3
 -7 -3 -12 28.5577 9.29993 1
 -7 -3 -12 41.1744 9.81547 3
 -7 3 -12 26.1086 9.7901 3
 7 3 12 15.6905 7.62669 1
 -8 -3 -12 28.3735 11.9207 1
 8 -3 12 6.75305 8.85346 1
 -8 -3 -12 -14.069 11.3904 3
 8 -3 12 10.2571 8.23472 3
 -8 -3 -12 -6.7362 9.27972 2
 8 3 12 12.3559 10.1146 1
 -8 3 -12 -3.8573 11.8192 3
 -8 -4 12 68.9001 9.49358 2
 -8 -4 12 63.591 9.21838 3
 8 -4 -12 68.8082 9.10923 3
 8 4 -12 51.2804 8.2363 1
 -8 4 12 46.8326 9.26901 2
 -7 -4 12 20.5416 5.96133 2
 -7 -4 12 23.8432 6.43157 3
 7 -4 -12 19.5959 6.55154 3
 -7 4 12 26.5582 7.00126 2
 7 4 -12 21.3027 5.60826 1
 -6 -4 12 198.702 10.4497 2
 -6 -4 12 204.729 8.80332 3
 6 -4 -12 187.149 10.1249 3
 -6 4 12 199.603 11.3204 2
 6 4 -12 194.906 10.2062 1
 6 4 -12 211.979 12.6034 2
 -5 -4 12 3.99779 3.47867 3
 -5 -4 12 -10.707 3.50961 2
 5 -4 -12 3.09708 3.95054 3
 -5 4 12 -3.9896 4.43575 2
 5 4 -12 3.72077 4.72919 2
 5 4 -12 7.17865 3.91449 1
 -4 -4 12 498.554 63.4773 4
 -4 -4 12 503.51 13.9883 2
 4 -4 -12 498.961 12.5101 3
 -4 -4 12 494.971 10.0998 3
 4 4 -12 501.909 14.546 2
 4 4 -12 518.014 14.2324 1
 -4 4 12 525.145 14.0678 2
 3 -4 -12 359.441 9.89078 3
 -3 -4 12 365.125 11.0562 2
 -3 4 12 367.113 10.6037 2
 3 4 -12 363.751 11.6404 2
 3 4 -12 376.942 10.8809 1
 -1 -4 12 214.126 7.67851 2
 -1 4 12 216.581 6.26625 2
 1 4 -12 216.059 8.22205 2
 0 -4 12 0.03792 1.63458 3
 0 -4 -12 8.4368 2.38475 1
 0 4 -12 0.8655 2.8812 2
 0 4 12 1.57307 1.49591 2
 1 -4 12 149.078 5.32273 3
 -1 -4 -12 164.341 7.21454 1
 -1 4 -12 176.17 7.57403 2
 -1 4 -12 172.887 4.27216 1
 -1 4 -12 161.253 5.77233 3
 2 -4 12 0.82068 2.49599 3
 -2 -4 -12 6.87039 3.11545 1
 -2 4 -12 6.06483 3.27895 3
 3 -4 12 322.91 9.26762 3
 -3 -4 -12 302.872 11.0198 1
 3 4 12 323.009 10.5295 1
 -3 4 -12 301.171 9.93785 3
 -4 -4 -12 381.364 12.4124 3
 4 -4 12 383.863 11.3364 3
 -4 -4 -12 360.375 13.1062 1
 -4 -4 -12 368.311 8.7235 2
 -4 4 -12 378.451 12.3149 3
 4 4 12 396.425 12.5017 1
 5 -4 12 -2.345 3.16468 1
 -5 -4 -12 2.3933 5.25991 3
 -5 -4 -12 -10.637 23.7795 4
 5 -4 12 2.19824 4.37545 3
 -5 -4 -12 5.34249 5.32517 1
 -5 -4 -12 0.04551 3.46885 2
 -5 4 -12 0.64247 6.21912 3
 5 4 12 -7.5115 3.74258 1
 6 -4 12 54.104 7.35448 3
 -6 -4 -12 28.9327 7.90475 3
 -6 -4 -12 51.3563 5.77965 2
 -6 -4 -12 41.4982 8.32286 1
 6 -4 12 46.0717 5.61781 1
 6 4 12 48.4899 7.07349 1
 -6 4 -12 45.076 8.49782 3
 -7 -4 -12 -7.5569 6.44332 2
 -7 -4 -12 1.91488 9.37824 1
 -7 -4 -12 5.78669 9.04448 3
 7 -4 12 -8.4536 6.70155 3
 7 -4 12 5.78874 6.2602 1
 7 4 12 6.04253 7.24503 1
 -7 4 -12 3.50757 10.1616 3
 -8 -5 12 6.48631 8.81016 3
 -8 -5 12 -7.4187 8.39308 2
 8 -5 -12 7.26049 8.57306 3
 -8 5 12 -7.3919 8.42347 2
 8 5 -12 3.60756 7.34489 1
 -7 -5 12 42.2581 7.5832 2
 -7 -5 12 37.6912 7.04078 3
 7 -5 -12 47.2833 7.59392 3
 7 5 -12 40.1094 7.28584 1
 -7 5 12 29.1398 7.85181 2
 -6 -5 12 56.4582 6.97149 2
 6 -5 -12 46.1754 6.27361 3
 -6 -5 12 53.8638 5.82405 3
 -6 5 12 54.7049 7.26706 2
 6 5 -12 45.5869 7.61162 2
 6 5 -12 35.6447 6.06302 1
 -5 -5 12 74.389 7.76017 2
 -5 -5 12 -0.0858 70.2821 4
 5 -5 -12 77.9096 7.80534 3
 -5 -5 12 85.7844 6.09755 3
 5 5 -12 70.3287 7.81783 1
 5 5 -12 84.9165 7.74429 2
 -5 5 12 85.9006 8.73028 2
 -4 -5 12 5.37635 3.73747 2
 4 -5 -12 -1.1988 3.57001 3
 -4 -5 12 1.8542 2.76166 3
 -4 -5 12 37.2215 61.5741 4
 4 5 -12 0.25442 4.05723 2
 -4 5 12 -0.3496 3.82078 2
 4 5 -12 2.02022 3.66031 1
 -3 -5 12 220.726 53.6668 4
 3 -5 -12 142.168 7.15127 3
 -3 -5 12 139.57 7.36831 2
 -3 -5 12 130.648 4.08841 3
 -3 5 12 145.403 7.28449 2
 3 5 -12 142.512 7.24185 1
 3 5 -12 157.725 8.79585 2
 -2 -5 12 32.8253 4.20223 2
 -2 -5 12 -31.094 52.9827 4
 2 5 -12 27.4246 4.16984 2
 -2 5 12 26.6794 3.58902 2
 2 5 -12 25.2288 3.43481 1
 0 -5 -12 37.7728 3.87469 1
 0 -5 12 40.8907 3.57128 3
 0 5 -12 36.2419 2.98936 1
 0 5 -12 45.2227 4.78928 2
 1 -5 12 408.661 9.47062 3
 -1 -5 -12 376.277 28.019 4
 -1 -5 -12 394.242 11.9679 1
 -1 5 -12 414.663 12.1688 2
 -2 -5 -12 -2.4113 3.30315 1
 2 -5 12 5.56014 2.94665 3
 -2 -5 -12 6.87036 16.5976 4
 -2 5 -12 7.79821 3.80739 3
 4 -5 12 0.96583 4.28047 3
 -4 -5 -12 11.3358 5.02666 1
 4 5 12 4.67234 3.35493 1
 -4 5 -12 6.76431 5.50598 3
 5 -5 12 56.4222 6.26239 3
 -5 -5 -12 46.2042 7.19776 3
 -5 -5 -12 44.5988 4.89983 2
 -5 -5 -12 51.5611 7.152 1
 5 -5 12 58.1106 4.75501 1
 -5 -5 -12 29.8368 27.9067 4
 -5 5 -12 53.2211 7.96959 3
 5 5 12 58.9695 6.14954 1
 -6 -5 -12 -0.1684 7.32935 1
 6 -5 12 -1.3563 5.84892 3
 -6 -5 -12 5.13282 7.85356 3
 6 -5 12 -0.3824 4.09129 1
 -6 -5 -12 -0.038 4.52155 2
 6 5 12 -6.8991 5.09169 1
 -6 5 -12 4.13133 8.65509 3
 7 -5 12 5.16224 5.69437 1
 -7 -5 -12 -3.1307 6.30826 2
 -7 -5 -12 -2.0132 9.92756 3
 -7 -5 -12 29.1018 10.1225 1
 7 -5 12 9.6397 7.93557 3
 7 5 12 16.2783 8.05662 1
 -7 5 -12 19.7062 11.3817 3
 8 -6 -12 43.2193 10.1696 3
 -8 -6 12 24.6911 10.193 2
 -8 -6 12 36.223 9.83281 3
 -8 6 12 7.61215 10.4166 2
 8 6 -12 30.7553 9.88637 1
 -7 -6 12 55.176 8.02001 3
 7 -6 -12 47.6593 8.63618 3
 -7 -6 12 37.1458 8.04671 2
 7 6 -12 29.5342 10.5895 2
 -7 6 12 35.3171 8.76703 2
 7 6 -12 27.5541 8.23469 1
 -6 -6 12 74.7174 6.35426 3
 6 -6 -12 75.4393 7.93317 3
 -6 -6 12 64.2702 7.4453 2
 -6 -6 12 78.7287 95.812 4
 6 6 -12 70.1185 7.57077 1
 6 6 -12 79.4867 9.51292 2
 -6 6 12 73.4826 8.25927 2
 -5 -6 12 17.1201 5.13356 2
 5 -6 -12 9.77935 5.12546 3
 -5 -6 12 5.50316 4.07054 3
 5 6 -12 15.7404 5.15177 1
 -5 6 12 9.03703 5.83891 2
 5 6 -12 12.3633 6.56706 2
 -4 -6 12 96.5893 7.56775 2
 4 -6 -12 83.8039 7.49274 3
 -4 -6 12 89.0842 5.23836 3
 -4 -6 12 212.501 74.4641 4
 -4 6 12 84.4517 8.25953 2
 4 6 -12 91.3764 7.9567 2
 4 6 -12 88.7365 8.04786 1
 -3 -6 12 162.145 8.26115 2
 3 -6 -12 167.662 7.97881 3
 -3 -6 12 44.1047 68.348 4
 -3 -6 12 160.36 5.25095 3
 -3 6 12 149.334 8.04552 2
 3 6 -12 172.02 8.03425 1
 3 6 -12 158.416 9.9248 2
 -2 -6 12 116.501 4.32176 3
 -2 -6 12 118.199 7.13908 2
 2 6 -12 109.061 8.57307 2
 2 6 -12 122.135 6.4115 1
 -2 6 12 113.187 6.44967 2
 1 -6 -12 488.26 13.8879 1
 -1 -6 12 505.851 10.3845 3
 1 6 -12 507.086 14.5508 2
 -1 6 12 516.284 11.6708 2
 1 6 -12 518.478 12.0775 1
 0 -6 12 420.882 9.55085 3
 0 -6 -12 407.393 12.3444 1
 0 6 -12 418.726 12.8944 2
 0 6 -12 394.904 8.94553 1
 -1 -6 -12 314.242 11.2395 1
 -1 -6 -12 315.867 28.4835 4
 1 -6 12 332.186 9.03696 3
 -1 6 -12 339.833 11.7882 2
 2 -6 12 166.449 7.17889 3
 -2 -6 -12 114.617 25.2368 4
 -2 -6 -12 150.613 8.62851 1
 -2 6 -12 169.303 9.8408 2
 -3 -6 -12 85.2971 7.33045 1
 3 -6 12 97.7479 7.42119 3
 3 6 12 74.1802 6.76071 1
 -3 6 -12 97.2528 7.07549 3
 -4 -6 -12 20.3715 26.4542 4
 -4 -6 -12 21.6316 5.7671 1
 4 -6 12 22.7323 5.30969 3
 -4 6 -12 18.1072 6.69325 3
 4 6 12 21.3375 4.04937 1
 5 -6 12 21.5704 6.22751 3
 -5 -6 -12 22.4296 5.96336 1
 -5 -6 -12 34.5273 30.7892 4
 -5 -6 -12 20.4739 7.18918 3
 5 6 12 19.854 4.31291 1
 -5 6 -12 20.9741 7.98357 3
 -6 -6 -12 75.9312 6.71703 2
 6 -6 12 85.8139 8.60667 3
 -6 -6 -12 83.3143 9.80863 1
 -6 -6 -12 77.1696 9.73349 3
 6 6 12 82.2105 9.60637 1
 -6 6 -12 87.2757 11.1415 3
 7 -6 12 8.02861 8.42462 3
 -7 -6 -12 -7.1967 5.73943 2
 -7 -6 -12 5.19272 9.16444 1
 -7 -6 -12 6.17703 11.047 3
 7 -6 12 -1.8857 5.05628 1
 7 6 12 2.98751 7.14693 1
 -7 6 -12 -0.3638 12.4464 3
 7 -7 -12 2.57296 8.45125 3
 -7 -7 12 13.8444 8.95812 2
 -7 -7 12 -1.4665 7.90754 3
 7 7 -12 -2.4035 8.63495 1
 -7 7 12 -3.2876 9.00185 2
 7 7 -12 19.2582 11.9608 2
 -6 -7 12 25.3526 6.29753 3
 6 -7 -12 31.5468 7.46983 3
 -6 -7 12 26.5401 7.75114 2
 6 7 -12 25.8923 9.18488 2
 6 7 -12 28.7089 7.11233 1
 -6 7 12 24.8296 8.32517 2
 -5 -7 12 100.049 9.89041 2
 5 -7 -12 112.303 10.1539 3
 -5 -7 12 12.4447 91.5364 4
 -5 -7 12 102.3 7.73634 3
 5 7 -12 98.5144 10.3168 1
 5 7 -12 106.6 9.44486 2
 4 -7 -12 2.91127 4.61524 3
 -4 -7 12 -0.9295 3.58642 3
 -4 -7 12 6.77938 4.85044 2
 -4 -7 12 20.111 85.0763 4
 4 7 -12 -6.2829 5.71152 2
 4 7 -12 -4.1935 4.53743 1
 3 -7 -12 102.497 7.57534 3
 -3 -7 12 107.912 8.0791 2
 -3 -7 12 118.943 81.1946 4
 3 7 -12 110.261 7.73343 1
 3 7 -12 107.604 10.2161 2
 -2 -7 12 224.228 6.71778 3
 2 7 -12 222.996 11.1075 2
 2 7 -12 212.91 8.36899 1
 0 -7 12 474.263 11.3147 3
 0 -7 -12 477.304 14.4601 1
 0 7 -12 524.331 15.2487 2
 -1 -7 -12 41.322 23.8827 4
 1 -7 12 38.702 4.58507 3
 -1 -7 -12 53.9703 5.76671 1
 -1 7 -12 48.5918 6.14367 2
 -2 -7 -12 90.2969 8.15838 1
 2 -7 12 93.4718 7.4524 3
 -2 7 -12 88.1593 9.39535 2
 3 -7 12 23.6423 5.4667 3
 -3 -7 -12 39.9566 28.8839 4
 -3 -7 -12 22.9321 5.40076 1
 3 7 12 30.8203 4.76088 1
 -4 -7 -12 7.43109 6.05439 1
 4 -7 12 0.69593 5.30243 3
 -4 -7 -12 26.8808 31.4176 4
 4 7 12 -0.8998 3.84367 1
 5 -7 12 23.9949 7.17201 3
 -5 -7 -12 32.3313 8.09302 3
 -5 -7 -12 34.0958 7.50924 1
 -5 -7 -12 67.9279 37.4012 4
 -5 7 -12 32.0885 9.17481 3
 5 7 12 27.0217 5.61622 1
 -6 -7 -12 9.66109 7.94916 1
 -6 -7 -12 10.1475 9.4852 3
 6 -7 12 16.2279 8.27359 3
 -6 7 -12 18.2585 10.8387 3
 6 7 12 15.5212 5.84903 1
 -7 -8 12 11.7062 10.2477 2
 7 8 -12 -0.6141 13.4512 2
 -7 8 12 -4.7361 10.4698 2
 -6 -8 12 39.686 6.94401 3
 -6 -8 12 47.9228 9.2835 2
 6 -8 -12 41.7069 8.84714 3
 -6 -8 12 33.8095 122.926 4
 6 8 -12 50.677 11.0208 2
 6 8 -12 54.3368 8.87206 1
 -5 -8 12 81.4005 106.734 4
 -5 -8 12 1.33789 4.89282 3
 5 -8 -12 -2.8439 6.08039 3
 -5 -8 12 9.62594 6.62771 2
 5 8 -12 3.29701 5.80952 1
 5 8 -12 2.9049 8.24539 2
 4 -8 -12 116.569 52.6678 4
 -4 -8 12 27.3732 4.70337 3
 -4 -8 12 16.5608 5.81344 2
 -4 -8 12 7.28093 97.9751 4
 4 -8 -12 18.473 5.84865 3
 4 8 -12 10.5348 7.65208 2
 4 8 -12 22.883 5.5534 1
 2 -8 -12 2.42791 4.06812 1
 -2 -8 12 -1.0742 3.43425 3
 2 -8 -12 18.5678 37.9333 4
 2 8 -12 4.6483 3.74967 1
 2 8 -12 1.0129 5.69357 2
 -1 -8 12 235.032 8.2507 3
 1 -8 -12 227.732 10.4901 1
 1 8 -12 255.446 12.086 2
 1 8 -12 247.205 7.8352 1
 0 -8 -12 0.7845 3.87467 1
 0 -8 12 4.38719 3.79093 3
 0 -8 -12 70.6492 30.511 4
 0 8 12 2.65396 2.6853 2
 0 8 -12 4.39735 4.8696 2
 -1 -8 -12 2.82001 28.0243 4
 1 -8 12 38.4244 5.3059 3
 -1 -8 -12 38.1086 5.66776 1
 -1 8 -12 44.3825 6.98327 2
 -2 -8 -12 67.3951 32.0126 4
 -2 -8 -12 39.4087 5.89689 1
 2 -8 12 33.9264 5.64013 3
 -2 8 -12 91.4391 43.8587 4
 -2 8 -12 30.6049 6.56675 2
 3 -8 12 71.5936 7.11038 3
 -3 -8 -12 41.6687 32.5779 4
 -3 -8 -12 57.736 7.04081 1
 -4 -8 -12 22.2291 7.02738 1
 4 -8 12 24.1396 6.93641 3
 -4 -8 -12 39.3362 35.7397 4
 4 8 12 23.411 5.19362 1
 5 -8 12 35.906 8.21456 3
 -5 -8 -12 54.2178 8.46312 1
 5 8 12 31.804 5.9721 1
 -6 -8 -12 16.7518 9.69032 1
 6 -8 12 3.18732 9.72978 3
 -6 -8 -12 18.5659 11.8322 3
 6 8 12 4.75894 7.03771 1
 6 -9 -12 24.8463 9.47662 3
 -6 -9 12 4.71457 9.38679 2
 -6 -9 12 11.3086 8.01284 3
 6 9 -12 26.9213 12.4262 2
 6 9 -12 19.3244 9.0501 1
 5 -9 -12 116.357 10.4052 3
 -5 -9 12 13.9662 132.05 4
 -5 -9 12 128.593 10.9496 2
 -5 -9 12 108.535 7.88216 3
 5 9 -12 120.397 12.2548 2
 5 9 -12 130.005 13.6647 1
 -4 -9 12 3.64252 5.43292 3
 -4 -9 12 6.84034 6.83444 2
 -4 -9 12 51.7574 114.499 4
 4 -9 -12 3.13214 5.80606 3
 4 9 -12 0.72743 8.37105 2
 4 9 -12 5.59391 6.13321 1
 3 -9 -12 57.7161 6.93678 1
 3 -9 -12 50.1467 49.4698 4
 3 -9 -12 54.5608 7.07339 3
 3 9 -12 55.2111 6.40597 1
 3 9 -12 55.7439 8.99009 2
 -2 -9 12 15.3722 4.70415 3
 2 -9 -12 13.6728 5.24153 1
 2 -9 -12 6.55331 40.8424 4
 2 9 -12 14.9135 4.4687 1
 2 9 -12 21.0433 7.34669 2
 -1 -9 12 -0.453 4.39767 3
 1 -9 -12 19.6895 41.0059 4
 1 -9 -12 6.90478 5.15356 1
 1 9 -12 4.03984 3.02617 1
 1 9 -12 21.308 6.66832 2
 0 -9 -12 45.7647 33.8902 4
 0 -9 -12 116.333 9.89764 1
 0 -9 12 120.931 8.46818 3
 0 9 12 98.6733 5.99529 2
 0 9 -12 119.309 11.6142 2
 1 -9 12 18.7447 5.2501 3
 -1 -9 -12 60.6349 35.0926 4
 -1 -9 -12 16.9738 5.88606 1
 -1 9 -12 9.97766 6.27178 2
 -2 -9 -12 45.3654 7.35121 1
 2 -9 12 55.7023 7.05052 3
 -2 -9 -12 -9.096 35.4701 4
 -2 9 -12 55.563 7.73835 2
 -3 -9 -12 138.713 12.4814 1
 3 -9 12 137.125 11.4381 3
 -3 9 -12 131.459 13.6222 2
 -4 -9 -12 33.0244 8.31724 1
 4 -9 12 30.2784 8.58552 3
 -4 -9 -12 43.0612 44.3423 4
 4 9 12 36.3066 6.53388 1
 -5 -9 -12 29.4061 9.34336 1
 5 -9 12 24.4946 9.18352 3
 -5 -9 -12 24.6392 50.1909 4
 5 9 12 42.3161 7.21956 1
 5 -10 -12 16.1833 8.73599 3
 -5 -10 12 7.09458 7.69243 3
 -5 -10 12 9.36026 9.15869 2
 5 10 -12 13.9436 11.8561 2
 5 10 -12 7.85152 7.94613 1
 4 -10 -12 19.5876 7.67462 1
 -4 -10 12 17.0094 139.907 4
 4 -10 -12 3.49925 7.27549 3
 4 10 -12 22.0344 7.17497 1
 4 10 -12 31.9736 11.0356 2
 3 -10 -12 188.586 63.3359 4
 3 -10 -12 47.0172 7.57648 3
 3 -10 -12 74.5898 8.46406 1
 3 10 -12 60.3754 7.15201 1
 3 10 -12 62.4923 10.5676 2
 -2 -10 12 18.3907 5.79141 3
 2 -10 -12 -2.3801 49.1719 4
 2 -10 -12 23.5366 6.87805 1
 2 10 -12 15.3746 4.83011 1
 2 10 -12 21.189 9.05847 2
 1 -10 -12 27.4824 7.0022 1
 -1 -10 12 14.7446 5.56636 3
 1 10 -12 12.2159 8.00028 2
 1 10 -12 18.0872 3.50966 1
 0 -10 -12 1.8412 6.39951 1
 0 -10 -12 67.0144 43.7215 4
 0 -10 12 5.37086 5.7987 3
 0 10 12 2.75649 4.1256 2
 0 10 -12 1.45473 7.56066 2
 1 -10 12 25.8617 6.31131 3
 -1 -10 -12 26.193 7.4786 1
 -1 -10 -12 -22.507 38.2082 4
 -1 10 -12 19.9552 8.25529 2
 2 -10 12 31.348 7.80706 3
 -2 -10 -12 4.91298 43.801 4
 -2 -10 -12 15.2417 7.95933 1
 -2 10 -12 33.361 8.4598 2
 3 -10 12 -2.9868 8.00342 3
 -3 -10 -12 22.0017 9.07319 1
 -3 -10 -12 64.927 49.9997 4
 -3 10 -12 5.41436 8.94731 2
 -4 -10 -12 -48.633 51.9735 4
 4 -10 12 12.8978 9.60837 3
 -4 -10 -12 11.2836 9.33945 1
 -3 -11 12 49.7958 7.82631 3
 3 -11 -12 26.9676 7.61064 3
 3 -11 -12 58.9279 9.43517 1
 3 -11 -12 -12.344 67.1902 4
 3 11 -12 43.4018 11.8863 2
 3 11 -12 25.0749 7.11287 1
 2 -11 -12 37.1474 8.85095 1
 2 -11 -12 -23.13 58.4966 4
 -2 -11 12 27.9675 7.15998 3
 2 11 -12 36.5301 11.4022 2
 2 11 -12 28.953 5.66082 1
 1 -11 -12 30.7506 8.67305 1
 1 -11 -12 -0.7917 60.7336 4
 -1 -11 12 8.42046 7.07687 3
 1 11 -12 17.119 9.50337 2
 -1 11 12 23.6017 6.28572 2
 0 -11 12 34.2756 7.84385 3
 0 -11 -12 36.222 8.55451 1
 0 11 -12 20.0464 10.4529 2
 0 11 12 35.621 5.32371 2
 -1 -11 -12 24.4906 9.57194 1
 1 -11 12 19.2293 7.82794 3
 -1 11 -12 22.3423 10.3184 2
 -2 -11 -12 -0.9159 53.453 4
 2 -11 12 22.6045 9.14084 3
 -2 -11 -12 23.9924 9.87876 1
 -2 11 -12 18.5544 10.8398 2
 -3 -11 -12 11.5893 11.3585 1
 3 -11 12 11.267 10.3502 3
 -3 11 -12 24.0345 10.8128 2
 1 -12 -12 28.6705 10.8266 1
 1 12 -12 16.9985 11.9164 2
 -1 12 12 8.33919 7.75567 2
 0 -12 -12 18.9551 10.3474 1
 0 12 -12 25.8889 12.5001 2
 0 12 12 19.1728 6.38832 2
 9 0 -13 8.91319 8.9423 3
 9 0 -13 6.41799 7.17425 1
 -9 0 13 8.24813 10.9807 3
 -9 0 13 14.7856 8.07088 2
 8 0 -13 -3.7024 5.22133 1
 -8 0 13 12.9515 6.48228 2
 -8 0 13 -3.8162 7.91539 3
 8 0 -13 0.6173 6.09712 3
 -7 0 13 6.51393 6.06558 3
 7 0 -13 0.39296 4.43432 3
 -7 0 13 5.69079 4.97976 2
 -6 0 13 -0.704 4.58088 3
 -6 0 13 9.58132 4.14478 2
 6 0 -13 3.89805 3.47186 3
 -5 0 13 -4.4393 3.49031 2
 5 0 -13 -1.0836 2.63573 3
 4 0 -13 3.19495 3.61207 2
 4 0 -13 3.06879 2.28201 3
 -4 0 13 2.87443 3.0731 2
 -3 0 13 1.19827 2.51971 2
 3 0 -13 -1.5317 1.79152 3
 3 0 -13 1.57733 3.21387 2
 2 0 -13 -1.8548 1.49372 3
 2 0 -13 -1.2989 2.58704 2
 -2 0 13 -0.7867 2.27164 2
 1 0 -13 5.14634 2.54551 2
 -1 0 13 -1.1366 2.077 2
 0 0 -13 -1.0801 2.22625 2
 0 0 13 2.88149 2.06966 2
 -1 0 -13 1.63717 2.40522 2
 -2 0 -13 -1.8605 2.54523 2
 -2 0 -13 -2.0444 2.43367 1
 -2 0 -13 1.69477 2.52969 3
 -3 0 -13 -2.1233 2.92462 1
 3 0 13 2.85346 2.46429 1
 -3 0 -13 2.49527 3.25172 3
 4 0 13 2.65835 3.19366 1
 -4 0 -13 4.1598 3.74658 1
 -4 0 -13 -0.4358 4.29435 3
 -5 0 -13 6.56595 4.77553 1
 5 0 13 3.05759 4.09375 1
 -5 0 -13 1.75472 5.38579 3
 6 0 13 0.64659 5.29127 1
 -6 0 -13 12.0912 6.35232 1
 -6 0 -13 2.01625 7.01111 3
 -7 0 -13 -3.8423 7.59191 1
 -7 0 -13 -7.1551 8.74319 3
 7 0 13 -2.548 6.76966 1
 8 0 13 -12.913 8.97661 1
 -8 0 -13 14.9918 12.5397 3
 -9 -1 13 40.6293 9.07507 2
 9 -1 -13 56.751 9.67037 3
 -9 -1 13 40.1362 11.5652 3
 9 -1 -13 34.7018 8.68214 1
 -9 1 13 55.6068 9.15528 2
 9 1 -13 22.5232 7.37078 1
 8 -1 -13 16.7569 6.16525 1
 -8 -1 13 10.8813 7.94277 3
 -8 -1 13 10.2477 6.10994 2
 8 -1 -13 16.7227 6.56313 3
 8 1 -13 13.5168 6.57054 3
 -8 1 13 10.3068 6.68729 2
 8 1 -13 18.476 5.29324 1
 -7 -1 13 80.1868 9.07571 2
 -7 -1 13 76.9212 7.28967 3
 7 -1 -13 80.3025 6.50892 3
 7 1 -13 75.1754 8.48641 1
 7 1 -13 79.461 6.36633 3
 -7 1 13 99.6151 10.1653 2
 6 -1 -13 310.247 9.8593 3
 -6 -1 13 319.107 11.9643 2
 -6 -1 13 307.013 10.3224 3
 6 1 -13 318.739 9.42949 3
 -6 1 13 319.524 12.2268 2
 5 -1 -13 2.33622 3.19844 3
 -5 -1 13 4.03186 3.35168 3
 -5 -1 13 -3.0608 3.21893 2
 5 1 -13 4.22386 2.65233 3
 -5 1 13 0.99911 3.63327 2
 -4 -1 13 704.198 17.0133 2
 4 -1 -13 691.519 14.1674 3
 4 1 -13 702.393 13.3164 3
 -4 1 13 717.474 17.0137 2
 4 1 -13 705.244 17.3758 2
 -3 -1 13 156.967 6.67587 2
 3 -1 -13 157.216 5.15642 3
 3 -1 -13 151.987 7.21294 2
 3 1 -13 152.663 7.09487 2
 3 1 -13 151.9 3.99839 3
 -3 1 13 153.876 6.68192 2
 -2 -1 13 492.932 12.1631 2
 2 -1 -13 495.856 11.9498 2
 -2 1 13 483.505 11.7547 2
 2 1 -13 483.803 12.3276 2
 1 -1 -13 1404.54 27.4517 2
 -1 -1 13 1406.04 28.1308 2
 1 1 -13 1411.53 28.0845 2
 -1 1 13 1403.58 27.5099 2
 1 1 -13 1380.92 23.6092 3
 0 -1 -13 380.747 9.1715 2
 0 -1 13 379.244 9.76994 2
 0 1 -13 393.03 10.0747 2
 0 1 13 372.23 9.12488 2
 0 1 -13 388.881 7.83233 3
 -1 -1 -13 3101.33 57.0476 2
 -1 -1 -13 3065.07 60.3458 1
 -1 1 -13 3195.5 52.2485 3
 -1 1 -13 2998.75 59.5368 1
 -1 1 -13 3047.03 57.8837 2
 -2 -1 -13 2.33932 2.31384 2
 -2 -1 -13 -0.5623 2.70274 3
 -2 -1 -13 0.63136 2.57375 1
 -2 1 -13 1.00967 2.66287 3
 -2 1 -13 -1.4435 2.8619 2
 -2 1 -13 -0.9606 2.32965 1
 -3 -1 -13 293.647 10.0364 1
 -3 -1 -13 299.671 9.44894 3
 3 1 13 326.544 9.94808 1
 -3 1 -13 314.542 9.31146 1
 -3 1 -13 303.306 9.3684 3
 -4 -1 -13 232.573 9.78612 1
 -4 -1 -13 235.549 9.24476 3
 4 -1 13 229 8.60244 1
 -4 1 -13 227.266 9.48254 3
 4 1 13 231.961 9.29593 1
 -4 1 -13 225.818 8.81234 1
 -5 -1 -13 12.467 5.3219 1
 -5 -1 -13 6.746 5.51809 3
 5 -1 13 10.3602 4.17797 1
 -5 1 -13 16.8974 6.15191 3
 -5 1 -13 16.8355 4.87136 1
 5 1 13 9.83766 4.46591 1
 6 -1 13 88.1871 9.38487 1
 -6 -1 -13 109.551 11.2826 1
 -6 -1 -13 90.0088 8.6069 3
 6 1 13 95.1364 10.2179 1
 -6 1 -13 90.2101 7.92277 1
 -6 1 -13 106.443 9.11324 3
 7 -1 13 -4.5497 6.61803 1
 -7 -1 -13 2.90129 8.97432 3
 -7 -1 -13 -9.463 7.84017 1
 -7 1 -13 6.31626 9.22147 3
 7 1 13 -4.2969 6.77024 1
 8 -1 13 19.2427 9.7027 1
 -8 -1 -13 0.87533 11.4389 3
 8 1 13 17.8452 9.98793 1
 -8 1 -13 8.76628 11.9559 3
 -9 -2 13 6.76559 11.0072 3
 -9 -2 13 1.39079 7.94445 2
 9 -2 -13 24.2541 9.38777 3
 9 -2 -13 1.21843 8.44414 1
 9 2 -13 -13.476 6.52762 1
 -9 2 13 -3.6936 8.58468 2
 8 -2 -13 -3.3541 6.29465 3
 -8 -2 13 0.21206 7.85058 3
 -8 -2 13 -2.178 6.34728 2
 -8 2 13 16.7861 6.72513 2
 8 2 -13 3.56544 5.48732 1
 -7 -2 13 -6.1457 4.89126 2
 7 -2 -13 3.4244 5.08297 3
 -7 -2 13 2.08917 5.90288 3
 7 2 -13 -4.773 4.43736 1
 -7 2 13 3.60126 5.05719 2
 -6 -2 13 37.3188 5.24564 2
 -6 -2 13 39.318 5.02362 3
 6 -2 -13 38.06 4.96572 3
 6 2 -13 34.9597 5.39194 1
 -6 2 13 44.7892 6.00712 2
 -5 -2 13 -1.6568 3.34481 3
 -5 -2 13 -1.3109 3.49571 2
 5 -2 -13 -3.6431 3.21696 3
 5 2 -13 8.34492 4.84424 2
 -5 2 13 1.6529 3.8077 2
 -4 -2 13 2.52524 3.15208 2
 4 -2 -13 4.65514 3.02217 3
 4 2 -13 11.0159 3.76238 2
 -4 2 13 -1.2962 3.33259 2
 -3 -2 13 105.997 6.00679 2
 3 -2 -13 111.698 5.0674 3
 3 2 -13 106.825 6.63475 2
 -3 2 13 114.09 6.03484 2
 -2 -2 13 31.8914 3.5716 2
 -2 2 13 32.3446 3.36899 2
 2 2 -13 25.3745 3.79209 2
 1 -2 -13 55.8297 4.28369 2
 -1 -2 13 58.791 4.5321 2
 -1 2 13 50.8984 3.84939 2
 1 2 -13 65.6697 5.32949 2
 0 -2 -13 30.2488 3.31051 2
 0 2 -13 32.9928 3.6691 2
 0 2 13 36.4018 3.13874 2
 0 2 -13 31.2994 2.88912 3
 -1 -2 -13 14.6736 2.00468 2
 -1 -2 -13 9.9917 2.67071 1
 -1 2 -13 15.9402 3.36715 2
 -1 2 -13 7.03464 2.61714 3
 -1 2 -13 12.8506 2.20937 1
 -2 -2 -13 90.5693 5.86613 1
 2 -2 13 86.9984 4.74445 3
 -2 -2 -13 88.7134 4.06917 2
 -2 2 -13 95.6358 4.71124 1
 -2 2 -13 89.6037 5.31749 3
 -3 -2 -13 14.1576 3.93765 1
 -3 -2 -13 15.8248 3.93708 3
 3 -2 13 14.5175 3.25992 3
 -3 2 -13 10.2537 2.88237 1
 3 2 13 12.7153 3.27373 1
 -3 2 -13 17.2787 4.2033 3
 -4 -2 -13 0.58232 4.37415 1
 4 -2 13 -5.1101 2.62687 1
 4 -2 13 2.69846 3.52631 3
 -4 -2 -13 3.21898 4.52671 3
 -4 2 -13 2.86712 3.19256 1
 -4 2 -13 7.36768 4.83163 3
 4 2 13 -1.9363 3.17722 1
 5 -2 13 22.8546 4.95995 3
 -5 -2 -13 27.7649 5.9116 1
 5 -2 13 23.5319 4.39175 1
 -5 -2 -13 18.2887 5.59423 3
 -5 2 -13 32.8669 6.53403 3
 -5 2 -13 27.4817 4.69903 1
 5 2 13 23.3158 4.82802 1
 -6 -2 -13 26.8385 7.6873 3
 6 -2 13 25.265 5.40982 3
 -6 -2 -13 28.553 7.47023 1
 6 -2 13 21.5341 5.40658 1
 6 2 13 25.6096 6.3392 1
 -6 2 -13 25.4589 7.85791 3
 -7 -2 -13 -7.5069 6.56498 2
 7 -2 13 -3.2072 6.08183 3
 -7 -2 -13 6.55368 8.90792 1
 7 -2 13 -2.3221 6.51402 1
 -7 -2 -13 -6.4835 8.62037 3
 7 2 13 1.46209 7.59248 1
 -7 2 -13 5.62656 9.24644 3
 8 -2 13 2.68983 8.56372 1
 -8 -2 -13 0.56605 11.1517 1
 -8 -2 -13 1.30146 8.496 2
 -8 -2 -13 35.0084 12.3461 3
 8 2 13 -1.3181 9.57644 1
 -8 2 -13 4.3535 11.5429 3
 -8 -3 13 16.9525 8.18447 3
 -8 -3 13 4.77583 6.92263 2
 8 -3 -13 8.95417 6.98457 3
 8 3 -13 8.75546 5.49661 1
 -8 3 13 21.5058 7.95204 2
 -7 -3 13 12.8417 6.21981 3
 -7 -3 13 5.09493 5.38764 2
 7 -3 -13 12.3611 5.85063 3
 7 3 -13 7.8134 4.81738 1
 -7 3 13 5.21925 6.04646 2
 -6 -3 13 443.046 11.9421 3
 6 -3 -13 427.359 12.7911 3
 -6 -3 13 476.154 14.6399 2
 6 3 -13 458.157 16.3113 2
 -6 3 13 473.529 15.5006 2
 6 3 -13 432.997 14.5849 1
 -5 -3 13 14.0401 3.49091 3
 -5 -3 13 11.4215 3.8325 2
 5 -3 -13 13.5213 4.00714 3
 5 3 -13 11.5056 5.19461 2
 -5 3 13 17.101 4.98802 2
 5 3 -13 5.58549 3.62037 1
 -4 -3 13 518.268 10.009 3
 4 -3 -13 529.06 12.3688 3
 -4 -3 13 411.297 61.3469 4
 -4 -3 13 534.211 14.3791 2
 -4 3 13 548.744 14.2193 2
 4 3 -13 504.525 14.5603 2
 -3 -3 13 303.83 9.81728 2
 3 -3 -13 310.554 8.59505 3
 3 3 -13 289.571 10.3229 2
 -3 3 13 319.375 9.66408 2
 -2 -3 13 571.008 14.2772 2
 2 3 -13 573.318 14.5447 2
 -2 3 13 593.635 13.4141 2
 -1 -3 13 471.575 12.2149 2
 1 3 -13 483.107 12.5465 2
 -1 3 13 482.93 10.8004 2
 0 -3 -13 26.822 3.43744 1
 0 -3 13 -21.36 32.3156 4
 0 3 -13 25.6957 3.43793 2
 0 3 -13 28.7204 2.17454 3
 0 3 13 28.1061 2.76704 2
 1 -3 13 1195.87 21.5576 3
 -1 -3 -13 1196.38 26.1505 1
 -1 3 -13 1208.25 25.3428 2
 -1 3 -13 1204.57 21.6102 3
 -1 3 -13 1183.53 23.8788 1
 2 -3 13 73.1238 4.6728 3
 -2 -3 -13 83.3343 6.06591 1
 -2 -3 -13 62.2326 14.0641 4
 -2 3 -13 79.4592 5.35142 3
 -2 3 -13 73.9402 14.5401 4
 -2 3 -13 70.9224 3.88841 1
 -3 -3 -13 598.591 16.0574 1
 -3 -3 -13 609.766 14.4514 3
 3 -3 13 593.038 13.4562 3
 -3 -3 -13 568.073 12.235 2
 -3 3 -13 587.975 13.8647 3
 3 3 13 619.543 15.8767 1
 -3 3 -13 582.277 13.1192 1
 -4 -3 -13 163.941 9.31459 1
 4 -3 13 164.632 6.61368 1
 4 -3 13 148.334 7.64244 3
 -4 -3 -13 163.249 9.02177 3
 4 3 13 153.173 8.22472 1
 -4 3 -13 147.757 6.55864 1
 -4 3 -13 139.446 8.89968 3
 5 -3 13 21.5064 4.2001 1
 -5 -3 -13 19.2726 6.16328 3
 -5 -3 -13 29.7111 6.34944 1
 -5 -3 -13 49.5797 24.2653 4
 -5 -3 -13 18.1703 4.21392 2
 5 -3 13 26.7527 5.08745 3
 5 3 13 18.9221 4.87298 1
 -5 3 -13 19.8371 6.3445 3
 -6 -3 -13 120.193 8.96838 2
 -6 -3 -13 114.843 9.46368 3
 6 -3 13 124.897 9.18014 1
 -6 -3 -13 121.457 12.6857 1
 6 -3 13 105.725 10.0438 3
 -6 3 -13 129.994 10.1726 3
 6 3 13 126.52 11.0416 1
 -7 -3 -13 21.4864 10.0225 3
 -7 -3 -13 6.90111 6.89441 2
 7 -3 13 17.0624 7.48633 3
 -7 -3 -13 13.0811 9.4864 1
 7 -3 13 14.1 7.044 1
 -7 3 -13 15.9172 9.83172 3
 7 3 13 7.92627 7.9233 1
 -8 -3 -13 2.76957 12.4592 3
 8 -3 13 12.607 9.05209 3
 -8 3 -13 -4.7636 12.7043 3
 -8 -4 13 -1.7858 7.91352 2
 -8 -4 13 -0.5924 8.36833 3
 8 -4 -13 7.26385 8.07684 3
 8 4 -13 0.78262 6.57008 1
 -8 4 13 -12.031 7.68848 2
 7 -4 -13 -1.2461 6.07083 3
 -7 -4 13 -5.1012 5.41072 2
 -7 -4 13 -2.4818 6.10603 3
 7 4 -13 -0.0066 5.02673 1
 -7 4 13 -18.97 5.99555 2
 -6 -4 13 4.02636 4.69104 3
 6 -4 -13 5.7658 5.22049 3
 -6 -4 13 2.40211 4.44069 2
 -6 4 13 0.4966 5.3889 2
 6 4 -13 5.10834 6.25742 2
 6 4 -13 -0.9932 4.57066 1
 5 -4 -13 114.275 7.93727 3
 -5 -4 13 104.701 7.92825 2
 -5 -4 13 97.186 5.8373 3
 5 4 -13 103.439 8.15202 1
 5 4 -13 105.51 9.57177 2
 -5 4 13 97.0287 8.52532 2
 -4 -4 13 33.9599 2.69638 3
 4 -4 -13 33.0104 4.40285 3
 -4 -4 13 30.7359 4.29225 2
 4 4 -13 34.5388 4.47721 1
 4 4 -13 32.1719 4.786 2
 -4 4 13 25.0625 4.71758 2
 -2 -4 13 13.2201 44.0127 4
 -2 -4 13 14.6056 2.9711 2
 -2 4 13 17.0748 3.07693 2
 2 4 -13 18.6362 4.1078 2
 -1 -4 13 93.0962 5.57679 2
 -1 -4 13 118.923 47.4235 4
 -1 4 13 93.7774 4.45785 2
 1 4 -13 83.6564 6.43077 2
 0 -4 -13 300.035 9.63373 1
 0 -4 13 324.183 6.77699 3
 0 4 -13 318.017 10.1972 2
 0 4 13 313.496 6.96558 2
 2 -4 13 57.8004 4.84491 3
 -2 -4 -13 62.5989 6.05426 1
 -2 4 -13 60.1254 5.73407 3
 -2 4 -13 62.4475 6.9156 2
 -3 -4 -13 179.75 9.10118 1
 3 -4 13 176.192 7.59265 3
 3 4 13 193.267 8.19726 1
 -3 4 -13 189.92 8.71457 3
 -5 -4 -13 -6.8705 5.73731 3
 -5 -4 -13 -0.7205 3.52345 2
 -5 -4 -13 1.29521 24.6394 4
 -5 -4 -13 4.22266 5.87844 1
 5 -4 13 -0.9226 4.74796 3
 5 -4 13 1.91504 3.1504 1
 -5 4 -13 1.43608 6.57309 3
 5 4 13 3.46896 4.05539 1
 6 -4 13 4.31478 4.55864 1
 -6 -4 -13 2.68642 7.62153 1
 6 -4 13 -1.4478 5.51574 3
 -6 -4 -13 1.11983 4.96179 2
 -6 -4 -13 4.38523 7.74078 3
 -6 -4 -13 57.8597 33.5471 4
 -6 4 -13 -2.0378 8.12363 3
 6 4 13 2.22807 5.48587 1
 -7 -4 -13 24.8195 9.85513 3
 -7 -4 -13 8.6292 6.89905 2
 7 -4 13 22.3783 7.80346 3
 -7 -4 -13 33.9052 10.2034 1
 7 -4 13 20.0604 6.39959 1
 -7 4 -13 37.5491 10.8622 3
 7 4 13 12.4896 7.575 1
 -8 -5 13 36.1815 9.32851 3
 8 -5 -13 39.843 9.61082 3
 -8 -5 13 22.4286 9.70125 2
 8 5 -13 39.7041 8.56341 1
 -8 5 13 25.4759 10.4145 2
 7 -5 -13 11.3076 7.06547 3
 -7 -5 13 11.7718 6.5953 3
 -7 -5 13 9.7228 6.77161 2
 -7 5 13 -3.4304 7.21723 2
 7 5 -13 5.12651 6.6629 1
 6 -5 -13 121.268 9.93795 3
 -6 -5 13 120.866 8.28316 3
 -6 -5 13 117.71 9.86762 2
 6 5 -13 138.403 12.9718 2
 -6 5 13 99.0997 10.9788 2
 6 5 -13 128.67 10.0554 1
 5 -5 -13 28.4708 47.1236 4
 -5 -5 13 32.8242 4.00998 3
 5 -5 -13 19.8385 5.38262 3
 -5 -5 13 18.7398 4.63336 2
 -5 -5 13 23.2912 75.4597 4
 5 5 -13 21.6554 5.72978 2
 -5 5 13 22.0313 5.89313 2
 5 5 -13 21.6805 5.05498 1
 4 -5 -13 367.443 10.9502 3
 -4 -5 13 281.741 73.0879 4
 -4 -5 13 338.504 7.58561 3
 -4 -5 13 356.308 11.9433 2
 4 5 -13 327.643 11.4786 1
 -4 5 13 338.208 11.8652 2
 4 5 -13 334.69 12.3185 2
 -3 -5 13 155.555 60.3058 4
 -3 -5 13 214.779 8.81278 2
 3 5 -13 200.194 9.82561 2
 -3 5 13 191.897 8.36496 2
 3 5 -13 198.119 8.21472 1
 -2 -5 13 155.333 60.2561 4
 -2 -5 13 164.426 7.54868 2
 2 5 -13 164.466 6.86265 1
 2 5 -13 162.414 8.70073 2
 -2 5 13 163.225 6.88335 2
 -1 -5 13 698.148 12.7107 3
 -1 5 13 715.138 14.9034 2
 1 5 -13 721.729 15.6904 1
 1 5 -13 702.774 17.6251 2
 0 -5 13 63.5778 3.77008 3
 0 -5 -13 68.0155 5.27139 1
 0 5 -13 56.5883 3.45459 1
 0 5 -13 59.0015 5.44205 2
 -1 -5 -13 324.827 10.8764 1
 1 -5 13 308.21 8.13835 3
 -1 5 -13 330.632 11.2202 2
 3 -5 13 76.243 6.82809 3
 -3 -5 -13 73.5197 7.99649 1
 3 5 13 94.0729 6.60763 1
 -3 5 -13 78.2888 8.07161 3
 -3 5 -13 114.127 26.1268 4
 4 -5 13 188.12 9.23808 3
 -4 -5 -13 203.192 10.7073 1
 -4 5 -13 180.175 10.849 3
 4 5 13 181.238 9.01821 1
 -5 -5 -13 21.2861 7.02047 3
 5 -5 13 17.3562 5.44949 3
 -5 -5 -13 13.6823 6.3006 1
 -5 -5 -13 36.7035 26.8773 4
 5 5 13 16.3456 4.59695 1
 -5 5 -13 15.3137 7.41076 3
 -6 -5 -13 58.3707 9.62801 3
 -6 -5 -13 55.9272 9.09757 1
 -6 -5 -13 4.27096 32.401 4
 6 -5 13 65.9518 7.11357 1
 6 -5 13 48.1997 7.58262 3
 -6 -5 -13 55.6381 5.38201 2
 -6 5 -13 61.1004 10.0855 3
 6 5 13 72.2809 7.40829 1
 7 -5 13 0.55872 5.77098 1
 -7 -5 -13 -5.654 9.78997 3
 -7 -5 -13 14.313 10.121 1
 -7 -5 -13 2.24495 6.49921 2
 7 -5 13 5.8857 7.73789 3
 -7 5 -13 24.3149 12.298 3
 7 5 13 -2.718 7.55848 1
 -7 -6 13 19.4619 7.98147 2
 -7 -6 13 23.302 7.27826 3
 7 -6 -13 29.5758 8.04374 3
 7 6 -13 4.37836 7.17681 1
 -7 6 13 -9.0283 8.29457 2
 7 6 -13 30.5713 11.1087 2
 6 -6 -13 84.0708 8.20492 3
 -6 -6 13 89.1763 8.50836 3
 -6 -6 13 81.2868 8.37126 2
 6 6 -13 96.104 9.88948 2
 6 6 -13 92.3389 8.33763 1
 -6 6 13 83.6203 8.66531 2
 -5 -6 13 16.6216 4.16891 3
 5 -6 -13 11.3535 5.31003 3
 -5 -6 13 17.965 5.63532 2
 5 6 -13 8.6235 5.14509 1
 5 6 -13 17.086 6.56756 2
 -5 6 13 15.84 5.84784 2
 -4 -6 13 19.98 3.09253 3
 -4 -6 13 72.5792 73.518 4
 -4 -6 13 26.3575 4.58669 2
 4 -6 -13 17.9837 4.96226 3
 4 6 -13 21.3532 5.78341 2
 -4 6 13 10.2627 4.84558 2
 4 6 -13 17.5766 4.64026 1
 -3 -6 13 113.177 7.54545 2
 -3 -6 13 112.177 4.38878 3
 -3 -6 13 91.4428 70.6307 4
 -3 6 13 118.242 7.65811 2
 3 6 -13 125.824 7.60749 1
 3 6 -13 120.123 9.59296 2
 -2 -6 13 12.851 2.24654 3
 -2 -6 13 16.4497 3.76229 2
 2 6 -13 10.5707 4.70948 2
 2 6 -13 9.46332 3.40241 1
 -2 6 13 6.38404 3.42113 2
 0 -6 -13 548.913 15.2296 1
 0 -6 13 558.808 11.6359 3
 0 6 -13 589.76 15.9747 2
 0 6 -13 526.441 11.6299 1
 -1 -6 -13 256.375 10.3113 1
 1 -6 13 247.462 7.90552 3
 -1 6 -13 277.061 11.1098 2
 -2 -6 -13 69.8139 25.3386 4
 2 -6 13 91.8006 6.5538 3
 -2 -6 -13 90.1034 7.64755 1
 -2 6 -13 81.3341 8.58247 2
 -3 -6 -13 14.2044 24.2298 4
 -3 -6 -13 13.2812 4.92213 1
 3 -6 13 7.59751 4.33096 3
 -3 6 -13 10.9287 5.60931 3
 3 6 13 7.93881 3.68164 1
 4 -6 13 -5.1831 4.97179 3
 -4 -6 -13 16.9553 27.9925 4
 -4 -6 -13 7.23761 5.21715 1
 -4 6 -13 -4.7951 6.61214 3
 4 6 13 -0.8434 3.4325 1
 5 -6 13 15.5742 6.14478 3
 -5 -6 -13 20.0057 6.80401 1
 -5 -6 -13 20.167 7.79705 3
 -5 6 -13 19.9226 8.38767 3
 5 6 13 9.26819 4.60387 1
 -6 -6 -13 -5.0257 7.6212 1
 6 -6 13 9.02707 7.43117 3
 -6 -6 -13 -3.6339 8.99618 3
 -6 -6 -13 68.392 38.0578 4
 -6 6 -13 -8.724 9.89639 3
 6 6 13 0.82679 5.38471 1
 7 -6 13 13.1104 9.98464 3
 -7 -6 -13 19.4527 10.5977 1
 -7 -6 -13 25.0062 12.2714 3
 -7 -6 -13 9.08316 5.94052 2
 -7 6 -13 9.0848 13.5004 3
 7 6 13 21.8813 7.85728 1
 7 -7 -13 7.65685 8.49983 3
 -7 -7 13 19.7936 8.09254 3
 -7 -7 13 14.1453 9.25573 2
 7 7 -13 10.6718 8.44474 1
 -7 7 13 7.36627 9.26481 2
 7 7 -13 23.5938 12.4342 2
 -6 -7 13 35.6288 7.83983 2
 6 -7 -13 34.8641 8.28234 3
 -6 -7 13 28.3678 6.19316 3
 -6 7 13 40.5372 8.18807 2
 6 7 -13 33.4148 9.98078 2
 6 7 -13 34.7416 7.92624 1
 -5 -7 13 19.11 6.18318 2
 -5 -7 13 27.3961 93.4348 4
 -5 -7 13 20.4694 4.55532 3
 5 -7 -13 24.9211 6.29595 3
 5 7 -13 9.36066 5.88926 1
 5 7 -13 18.1512 7.37395 2
 -5 7 13 18.362 6.67082 2
 -4 -7 13 90.1395 5.80382 3
 -4 -7 13 48.849 86.8767 4
 -4 -7 13 106.463 8.9991 2
 4 -7 -13 97.5028 9.10822 3
 4 7 -13 92.8891 8.72619 2
 -4 7 13 92.6135 9.64077 2
 4 7 -13 91.5479 8.93284 1
 -3 -7 13 6.89014 4.24069 2
 -3 -7 13 6.41068 82.9461 4
 3 7 -13 6.19181 5.75232 2
 3 7 -13 0.58226 3.83481 1
 -3 7 13 0.87481 4.32895 2
 2 -7 -13 16.2783 34.8785 4
 -2 -7 13 20.1908 3.00263 3
 2 7 -13 20.1216 5.37276 2
 2 7 -13 16.8128 3.82566 1
 -2 7 13 19.7955 4.12844 2
 -1 -7 13 248.348 7.25251 3
 1 -7 -13 259.926 10.087 1
 -1 7 13 237.457 7.76336 2
 1 7 -13 255.253 11.455 2
 1 7 -13 244.399 7.76639 1
 0 -7 -13 195.044 32.1735 4
 0 -7 -13 155.247 8.57119 1
 0 -7 13 147.208 6.84804 3
 0 7 -13 168.161 9.96838 2
 -1 -7 -13 -14.227 24.1812 4
 1 -7 13 15.012 4.16892 3
 -1 -7 -13 28.0765 4.79016 1
 -1 7 -13 24.1556 5.90864 2
 2 -7 13 -4.6218 4.07172 3
 -2 -7 -13 4.04784 4.21951 1
 -2 -7 -13 57.0667 26.5934 4
 -2 7 -13 -5.2229 4.59068 2
 -3 -7 -13 18.2932 27.0828 4
 3 -7 13 33.9993 5.46607 3
 -3 -7 -13 9.57931 5.11706 1
 4 -7 13 24.0091 5.8716 3
 -4 -7 -13 21.4699 6.60484 1
 -4 -7 -13 27.0837 31.6482 4
 -4 7 -13 25.9433 7.88706 3
 4 7 13 25.7351 5.39341 1
 -5 -7 -13 102.143 39.337 4
 -5 -7 -13 55.4406 9.2813 3
 5 -7 13 57.8112 8.40407 3
 -5 -7 -13 82.1298 9.14507 1
 5 7 13 60.807 6.15106 1
 -5 7 -13 65.5193 10.1695 3
 6 -7 13 34.5633 9.00281 3
 -6 -7 -13 41.7327 10.5858 3
 -6 -7 -13 30.6965 8.92194 1
 6 7 13 16.4144 6.23186 1
 -6 7 -13 39.1796 11.6395 3
 6 -8 -13 32.7391 8.52504 3
 -6 -8 13 19.2901 6.86881 3
 -6 -8 13 43.9783 8.48851 2
 6 8 -13 31.2883 8.43164 1
 -6 8 13 24.9084 9.35866 2
 6 8 -13 31.2191 10.8199 2
 -5 -8 13 27.1196 7.27024 2
 -5 -8 13 49.6498 108.739 4
 -5 -8 13 20.0006 5.20816 3
 5 -8 -13 25.3095 7.42179 3
 5 8 -13 20.6364 8.85216 2
 -5 8 13 14.2526 7.42597 2
 5 8 -13 13.4238 6.66347 1
 4 -8 -13 108.538 54.5119 4
 -4 -8 13 4.74713 102.454 4
 -4 -8 13 42.5913 4.73331 3
 -4 -8 13 38.1607 6.92844 2
 4 -8 -13 49.737 6.94386 3
 4 8 -13 42.494 6.33068 1
 4 8 -13 47.151 8.68915 2
 -3 -8 13 -5.6189 91.5796 4
 -2 -8 13 22.0861 3.74559 3
 2 -8 -13 83.739 40.2201 4
 2 -8 -13 24.2661 4.89843 1
 2 8 -13 25.9986 4.41475 1
 2 8 -13 21.1898 6.44691 2
 0 -8 -13 34.1061 5.29396 1
 0 -8 -13 39.3475 31.1381 4
 0 -8 13 49.8154 4.8333 3
 0 8 -13 42.9666 6.62721 2
 -1 8 -13 160.885 45.3325 4
 2 -8 13 59.1074 6.23699 3
 -2 -8 -13 3.22603 30.0339 4
 -2 -8 -13 52.6818 6.32576 1
 -2 8 -13 11.4951 41.8261 4
 -2 8 -13 63.3121 7.94595 2
 -3 -8 -13 34.7544 33.9265 4
 -3 -8 -13 32.076 6.48715 1
 3 -8 13 39.9098 6.67211 3
 -3 8 -13 29.1446 7.18174 2
 -4 -8 -13 53.9118 40.7406 4
 4 -8 13 30.1501 7.10881 3
 -4 -8 -13 39.8079 7.82717 1
 4 8 13 34.1611 5.9257 1
 -5 -8 -13 27.0046 43.2958 4
 5 -8 13 20.2958 8.1242 3
 -5 -8 -13 37.8327 9.19744 1
 5 8 13 33.3577 6.09486 1
 6 8 13 8.9109 7.00103 1
 -6 -9 13 6.94597 9.61635 2
 6 -9 -13 41.9887 10.519 3
 -6 -9 13 25.4676 7.74914 3
 6 9 -13 25.5646 9.7429 1
 6 9 -13 41.7722 13.2513 2
 -6 9 13 19.0727 10.5331 2
 -5 -9 13 6.54998 8.1265 2
 5 -9 -13 -10.653 67.3691 4
 -5 -9 13 -1.0584 5.89357 3
 5 -9 -13 10.0147 7.61791 3
 -5 -9 13 53.5991 127.506 4
 5 9 -13 -0.1814 10.3946 2
 5 9 -13 0.31259 7.148 1
 4 -9 -13 57.7302 60.1571 4
 -4 -9 13 23.5819 119.957 4
 4 -9 -13 19.4299 6.55928 3
 -4 -9 13 15.4781 5.40467 3
 -4 -9 13 17.7866 7.37188 2
 4 9 -13 4.53825 8.8285 2
 4 9 -13 14.5697 6.56672 1
 3 -9 -13 28.798 6.41853 1
 3 -9 -13 18.1902 5.98988 3
 -3 -9 13 25.2579 4.83874 3
 3 9 -13 29.3746 5.78004 1
 3 9 -13 33.0409 8.63004 2
 2 -9 -13 21.4181 5.71603 1
 -2 -9 13 20.1796 4.59205 3
 2 -9 -13 72.5322 46.0283 4
 2 9 -13 16.7922 4.443 1
 2 9 -13 19.6078 7.75228 2
 1 -9 -13 9.33339 5.37854 1
 -1 -9 13 12.5561 4.63591 3
 1 -9 -13 28.0611 44.6926 4
 1 9 -13 10.3607 6.12085 2
 1 9 -13 6.56484 3.22719 1
 -1 9 13 -0.5679 4.02181 2
 -1 -9 -13 -21.515 32.0142 4
 -1 -9 -13 37.5564 6.668 1
 1 -9 13 67.5094 6.64269 3
 -1 9 -13 48.9537 7.74761 2
 -2 9 -13 10.4749 7.13658 2
 -3 -9 -13 59.0013 41.213 4
 -3 -9 -13 28.9537 7.58376 1
 3 -9 13 27.5111 7.15708 3
 -3 9 -13 18.1701 8.13034 2
 -4 -9 -13 22.4646 8.21799 1
 4 -9 13 31.5486 8.62858 3
 -4 -9 -13 7.46135 42.4289 4
 -5 -9 -13 39.5687 9.58818 1
 5 -9 13 -6.4246 9.40361 3
 5 9 13 11.3156 7.07302 1
 5 -10 -13 63.4174 10.1549 3
 -5 -10 13 65.7294 11.2328 2
 -5 -10 13 52.7833 8.06576 3
 5 10 -13 58.2752 9.94887 1
 5 10 -13 61.8983 13.7452 2
 -4 -10 13 43.7373 147.075 4
 -4 -10 13 10.7288 6.66052 3
 4 -10 -13 -0.1579 7.36043 3
 4 -10 -13 -1.0807 7.51988 1
 4 10 -13 3.70702 6.98261 1
 4 10 -13 1.73455 10.4988 2
 -3 -10 13 100.666 7.31553 3
 3 -10 -13 106.823 12.5012 1
 3 -10 -13 141.131 63.0554 4
 3 -10 -13 90.1554 9.01823 3
 3 10 -13 101.284 11.8495 2
 3 10 -13 90.9623 7.85132 1
 2 -10 -13 1.57073 6.34839 1
 -2 -10 13 5.92102 5.43982 3
 2 -10 -13 -19.028 52.6996 4
 2 10 -13 -6.7883 4.45295 1
 2 10 -13 -1.9502 8.92337 2
 -1 -10 13 10.2625 5.68197 3
 1 -10 -13 12.1983 6.43807 1
 1 10 -13 11.1502 8.00791 2
 1 10 -13 7.4138 3.20471 1
 0 -10 13 49.7521 6.62589 3
 0 -10 -13 44.3552 8.27993 1
 0 -10 -13 34.6619 44.7129 4
 0 10 -13 35.3674 8.61187 2
 1 -10 13 4.11799 6.50873 3
 -1 -10 -13 3.18761 6.94517 1
 -1 -10 -13 1.27261 39.6575 4
 -1 10 -13 -4.8196 8.20998 2
 2 -10 13 4.57773 7.37545 3
 -2 -10 -13 -6.4544 7.74322 1
 -2 -10 -13 13.355 46.2723 4
 -2 10 -13 -1.6191 8.51319 2
 3 -10 13 85.8317 9.71731 3
 -3 -10 -13 74.3882 10.6317 1
 -3 -10 -13 -14.671 45.8707 4
 -3 10 -13 47.7967 9.65627 2
 4 -10 13 7.01263 10.3939 3
 -4 -10 -13 20.7957 10.623 1
 -4 10 -13 1.13074 9.95635 2
 3 -11 -13 9.64887 7.49637 3
 -3 -11 13 7.89007 7.20473 3
 3 -11 -13 17.666 8.99008 1
 3 11 -13 17.3708 12.1548 2
 3 11 -13 6.67003 6.62482 1
 2 -11 -13 -35.832 61.958 4
 2 -11 -13 3.11861 8.29402 1
 -2 -11 13 -7.0316 6.56595 3
 2 11 -13 -4.3173 10.565 2
 2 11 -13 5.83255 4.99741 1
 1 -11 -13 29.1105 8.53683 1
 -1 -11 13 20.4328 7.40885 3
 1 -11 -13 105.968 65.7684 4
 1 11 -13 15.4751 9.99688 2
 -1 11 13 25.1412 6.30229 2
 0 -11 -13 29.9678 9.21827 1
 0 -11 -13 191.026 62.8623 4
 0 11 -13 18.6819 10.4162 2
 -1 -11 -13 -33.423 47.7101 4
 1 -11 13 9.71066 8.00398 3
 -1 -11 -13 25.2327 8.88776 1
 -1 11 -13 16.4499 9.86809 2
 -2 -11 -13 17.7649 56.207 4
 -2 -11 -13 10.8269 9.93785 1
 2 -11 13 -5.9978 8.89282 3
 -2 11 -13 14.9013 10.9143 2
 -9 0 14 49.171 8.76801 2
 9 0 -14 60.1544 10.2363 3
 -9 0 14 39.1903 11.6345 3
 -8 0 14 19.8673 6.41155 2
 -8 0 14 11.4665 8.43309 3
 8 0 -14 17.7132 6.49976 3
 8 0 -14 6.28731 5.29689 1
 7 0 -14 236.843 10.0348 3
 -7 0 14 234.335 12.1129 2
 6 0 -14 114.809 6.79831 3
 -6 0 14 99.4404 8.44442 2
 -5 0 14 258.846 10.3358 2
 5 0 -14 274.165 7.89198 3
 4 0 -14 420.834 12.7072 2
 -4 0 14 429.89 12.3579 2
 4 0 -14 425.699 9.38323 3
 3 0 -14 18.6547 2.30275 3
 -3 0 14 14.2665 3.39078 2
 3 0 -14 16.8251 3.67006 2
 -2 0 14 838.131 18.2942 2
 2 0 -14 830.482 18.4035 2
 2 0 -14 834.38 14.9575 3
 -1 0 14 259.624 7.7854 2
 1 0 -14 263.335 8.15001 2
 0 0 14 6.56908 2.31431 2
 0 0 -14 2.49506 2.55404 2
 -1 0 -14 2651.3 52.6105 1
 -1 0 -14 2702.92 50.4065 2
 -1 0 -14 2661.5 45.862 3
 -2 0 -14 102.71 5.62042 2
 -2 0 -14 101.28 5.54438 3
 -2 0 -14 100.418 5.75578 1
 -3 0 -14 900.692 18.5714 3
 -3 0 -14 882.792 20.2887 1
 4 0 14 81.0147 6.64168 1
 -4 0 -14 82.9387 7.08423 1
 -4 0 -14 76.8461 7.61813 3
 5 0 14 75.9795 8.0078 1
 -5 0 -14 75.6901 7.44776 3
 -5 0 -14 75.476 6.90206 1
 -6 0 -14 170.77 12.1145 1
 6 0 14 149.112 11.0556 1
 -6 0 -14 157.472 12.2435 3
 -7 0 -14 -4.8706 9.48974 3
 7 0 14 -12.127 6.6767 1
 -7 0 -14 0.20904 8.08478 1
 8 0 14 32.786 10.6633 1
 -8 0 -14 68.0502 13.6824 3
 -9 -1 14 3.14494 7.87141 2
 -9 1 14 17.3918 8.51059 2
 8 -1 -14 20.9699 6.66784 3
 -8 -1 14 13.1798 6.72056 2
 -8 -1 14 19.9106 8.06965 3
 -8 1 14 22.1686 6.57174 2
 8 1 -14 20.9786 5.78758 1
 8 1 -14 19.8433 6.71928 3
 7 -1 -14 8.13599 5.12835 3
 -7 -1 14 10.394 6.05564 3
 -7 -1 14 9.09929 5.11781 2
 7 1 -14 10.1284 4.97879 3
 7 1 -14 25.3068 5.16252 1
 -7 1 14 14.5867 5.45518 2
 -6 -1 14 45.1727 5.70247 2
 6 -1 -14 42.4734 4.70514 3
 -6 -1 14 38.7851 5.29943 3
 6 1 -14 41.691 4.50333 3
 -6 1 14 45.8173 5.61403 2
 -5 -1 14 4.37431 3.77392 2
 5 -1 -14 12.3038 3.56161 3
 5 1 -14 9.63475 4.78819 2
 -5 1 14 2.62925 3.92557 2
 5 1 -14 8.27943 2.81098 3
 -4 -1 14 52.1474 4.94106 2
 4 -1 -14 57.4409 4.5862 3
 -4 1 14 49.5665 4.85051 2
 4 1 -14 53.5172 5.45856 2
 4 1 -14 48.84 3.5587 3
 3 -1 -14 9.0776 3.44288 2
 3 -1 -14 5.73842 2.2409 3
 -3 -1 14 5.40647 2.78853 2
 -3 1 14 7.57283 3.041 2
 3 1 -14 3.0394 3.19494 2
 3 1 -14 6.48891 1.55179 3
 2 -1 -14 66.7508 5.23217 2
 -2 -1 14 60.8729 4.98106 2
 2 1 -14 57.3186 5.58219 2
 -2 1 14 57.6304 4.76752 2
 1 -1 -14 54.1074 4.48209 2
 -1 -1 14 51.6759 4.58325 2
 1 1 -14 58.2358 2.5924 3
 -1 1 14 42.9434 4.06926 2
 1 1 -14 64.7203 5.1717 2
 0 -1 14 55.2196 4.41739 2
 0 -1 -14 61.2003 4.34167 2
 0 1 14 49.2855 3.77858 2
 0 1 -14 56.1551 5.05237 2
 0 1 -14 54.4893 3.28193 3
 -1 1 -14 34.063 3.73931 2
 -1 1 -14 51.7067 4.23781 1
 -1 1 -14 52.4707 4.07304 3
 -2 -1 -14 4.76314 2.82209 1
 -2 -1 -14 2.11829 2.56867 2
 -2 -1 -14 3.45378 2.99329 3
 -2 1 -14 4.13444 3.10318 2
 -2 1 -14 5.48582 2.72717 1
 -2 1 -14 6.67414 2.97188 3
 -3 -1 -14 7.93037 3.61533 1
 -3 -1 -14 11.0309 3.98032 3
 -3 1 -14 5.47781 3.84445 3
 -3 1 -14 5.86668 3.18367 1
 3 1 14 8.40218 3.18605 1
 -4 -1 -14 21.4329 4.92907 1
 -4 -1 -14 24.1788 4.84757 3
 4 -1 14 20.7924 3.8125 1
 -4 -1 -14 49.9463 15.0099 4
 4 1 14 15.8847 3.86231 1
 -4 1 -14 26.4201 4.27408 1
 -4 1 -14 24.8552 5.53674 3
 -5 -1 -14 35.3228 6.08527 1
 -5 -1 -14 37.1309 6.62478 3
 5 -1 14 34.3846 4.92712 1
 -5 1 -14 37.2439 6.9164 3
 -5 1 -14 45.2905 5.63041 1
 5 1 14 26.5416 5.2422 1
 -6 -1 -14 -8.6668 7.09111 3
 -6 -1 -14 3.79161 6.79508 1
 6 -1 14 -9.4765 5.30784 1
 6 1 14 2.79995 5.46165 1
 -6 1 -14 -0.0994 5.64293 1
 -6 1 -14 8.96704 7.34297 3
 -7 -1 -14 17.4434 9.78887 3
 7 -1 14 -8.2624 6.56202 1
 -7 -1 -14 1.92469 8.68981 1
 -7 1 -14 -4.895 10.1625 3
 7 1 14 -9.7796 6.82094 1
 8 -1 14 -21.57 9.41226 1
 -8 -1 -14 -34.662 11.7059 3
 8 1 14 4.35129 9.83142 1
 -8 1 -14 0.51676 12.5792 3
 -8 -2 14 10.7194 6.43729 2
 -8 -2 14 -4.0194 8.04418 3
 8 -2 -14 -6.2103 6.4208 3
 8 2 -14 2.0155 5.34069 1
 -8 2 14 -8.7481 7.21853 2
 7 -2 -14 4.63868 5.1364 3
 -7 -2 14 -4.3517 4.8101 2
 -7 -2 14 2.84034 6.07951 3
 7 2 -14 12.7345 4.42006 1
 -7 2 14 -0.5458 5.74312 2
 6 -2 -14 383.431 11.3975 3
 -6 -2 14 363.988 13.0222 2
 -6 -2 14 347.902 10.8427 3
 -6 2 14 361.521 13.7175 2
 6 2 -14 387.605 13.1942 1
 -5 -2 14 26.9189 3.76845 3
 5 -2 -14 22.1207 4.09964 3
 -5 -2 14 18.8445 4.00567 2
 -5 2 14 24.4257 4.7184 2
 5 2 -14 19.424 5.02278 2
 -4 -2 14 700.78 17.3934 2
 4 -2 -14 715.018 14.7488 3
 4 2 -14 683.689 17.6044 2
 -4 2 14 696.668 17.1765 2
 3 -2 -14 39.7358 3.41668 3
 -3 -2 14 46.7933 5.11069 2
 -3 2 14 29.0645 3.88014 2
 3 2 -14 36.5605 4.22438 2
 -2 -2 14 310.224 9.37258 2
 -2 2 14 305.605 8.78709 2
 2 2 -14 295.011 9.71767 2
 1 -2 -14 142.065 5.71245 2
 -1 -2 14 129.492 5.96986 2
 1 2 -14 146.856 6.70384 2
 -1 2 14 128.704 5.33253 2
 0 -2 -14 117.462 4.64416 2
 0 2 -14 123.796 6.1928 2
 0 2 14 111.567 4.51921 2
 0 2 -14 114.564 3.99177 3
 -1 -2 -14 471.014 10.2194 2
 -1 -2 -14 473.232 12.5357 1
 -1 2 -14 468.722 12.1742 2
 -1 2 -14 462.201 10.0103 3
 -1 2 -14 469.584 11.1484 1
 -2 -2 -14 12.2316 2.35334 2
 -2 -2 -14 12.9568 3.43602 1
 -2 2 -14 12.3287 2.73445 1
 -2 2 -14 11.8636 3.34952 3
 -2 2 -14 11.6098 3.52802 2
 -3 -2 -14 552.002 13.7065 3
 3 -2 14 542.672 12.7902 3
 -3 -2 -14 557.962 15.2231 1
 -3 -2 -14 563.175 12.4848 2
 -3 2 -14 519.631 13.1145 3
 3 2 14 559.886 14.9618 1
 -3 2 -14 556.654 13.3312 1
 -4 -2 -14 119.97 8.65351 3
 4 -2 14 119.146 6.63014 1
 -4 -2 -14 119.621 8.6965 1
 4 -2 14 101.763 7.05347 3
 -4 2 -14 119.306 6.78483 1
 4 2 14 106.081 7.6796 1
 -4 2 -14 128.209 8.76486 3
 -5 -2 -14 67.7434 7.5429 1
 5 -2 14 70.8228 5.98031 3
 -5 -2 -14 66.6418 6.95515 3
 5 -2 14 61.2884 5.69586 1
 -5 2 -14 71.4478 6.12867 1
 -5 2 -14 69.6186 7.82045 3
 5 2 14 48.5554 6.14103 1
 -6 -2 -14 215.208 13.6522 3
 -6 -2 -14 237.095 14.1751 1
 6 -2 14 211.803 11.0694 3
 6 -2 14 222.059 11.049 1
 6 2 14 211.466 12.7585 1
 -6 2 -14 213.982 13.5464 3
 -7 -2 -14 -1.4679 9.276 3
 -7 -2 -14 20.1379 9.43175 1
 7 -2 14 1.68833 6.78483 1
 7 2 14 13.8398 7.77606 1
 -7 2 -14 24.7264 10.1078 3
 -8 -3 14 7.9226 8.11857 3
 -8 -3 14 5.69558 6.946 2
 8 -3 -14 -12.398 7.09706 3
 -8 3 14 -5.224 7.41178 2
 7 -3 -14 8.03223 5.78532 3
 -7 -3 14 17.092 5.5981 2
 -7 -3 14 9.88134 6.05365 3
 7 3 -14 6.43211 4.93343 1
 -7 3 14 28.106 6.92085 2
 -6 -3 14 4.42321 4.4356 2
 -6 -3 14 7.13696 4.5251 3
 6 -3 -14 3.07385 4.82736 3
 6 3 -14 9.36488 6.29122 2
 6 3 -14 1.00102 4.08023 1
 -6 3 14 3.54635 5.15843 2
 -5 -3 14 79.3732 5.47096 3
 -5 -3 14 66.0913 7.25155 2
 5 -3 -14 76.2794 7.12756 3
 5 3 -14 88.249 9.25178 2
 5 3 -14 98.5818 7.87928 1
 -5 3 14 97.6849 8.83214 2
 4 -3 -14 39.7777 4.23964 3
 -4 -3 14 38.2911 4.65159 2
 -4 3 14 35.3122 4.74403 2
 4 3 -14 34.0857 5.13006 2
 3 -3 -14 53.8513 4.20692 3
 -3 -3 14 35.4961 45.0411 4
 -3 -3 14 43.1676 4.23822 2
 -3 3 14 48.5934 4.50378 2
 3 3 -14 54.784 5.42816 2
 -2 -3 14 75.1074 5.45346 2
 2 3 -14 70.9954 6.25479 2
 -2 3 14 71.1676 5.05851 2
 -1 -3 14 13.2352 2.9262 2
 -1 -3 14 -7.4358 33.6441 4
 -1 3 14 10.277 2.48594 2
 1 3 -14 13.349 3.36167 2
 0 -3 14 -15.275 32.6926 4
 0 -3 -14 -0.6919 2.146 1
 0 3 14 1.43827 1.73085 2
 0 3 -14 -0.6439 2.90944 2
 0 3 -14 0.76501 1.80319 3
 2 -3 14 55.7264 4.65957 3
 -2 -3 -14 71.0264 6.00783 1
 -2 3 -14 59.7667 6.63145 2
 -2 3 -14 65.9267 5.59337 3
 -2 3 -14 60.198 4.09513 1
 4 -3 14 22.7481 4.33453 3
 -4 -3 -14 27.7178 5.70191 3
 -4 -3 -14 32.5522 5.64196 1
 -4 -3 -14 15.861 17.776 4
 4 3 14 22.7103 4.41191 1
 -4 3 -14 13.0026 25.3088 4
 -4 3 -14 26.9214 5.58221 3
 -4 3 -14 24.4687 3.83339 1
 -5 -3 -14 31.9413 6.83561 1
 5 -3 14 41.1779 5.76323 3
 5 -3 14 31.047 4.45146 1
 -5 -3 -14 22.1667 6.73568 3
 -5 3 -14 30.672 6.82024 3
 5 3 14 30.157 5.51367 1
 -6 -3 -14 17.876 7.88561 3
 6 -3 14 24.6785 6.10947 3
 -6 -3 -14 15.7077 7.86587 1
 6 -3 14 21.0973 5.43619 1
 -6 -3 -14 25.4294 5.58213 2
 -6 3 -14 23.0623 8.11592 3
 6 3 14 26.6117 6.66008 1
 -7 -3 -14 8.57042 9.64975 1
 -7 -3 -14 12.8741 7.21704 2
 7 -3 14 7.14381 7.30581 3
 -7 -3 -14 12.0702 9.97071 3
 7 -3 14 25.2848 6.85249 1
 -7 3 -14 21.5923 10.1276 3
 7 3 14 10.7974 8.10355 1
 -8 -4 14 -7.2144 7.58505 2
 8 -4 -14 -0.0596 8.28689 3
 -8 -4 14 -2.9776 8.33802 3
 8 4 -14 2.80133 6.73708 1
 -8 4 14 -20.033 8.43447 2
 -7 -4 14 -5.7563 5.65939 2
 -7 -4 14 8.72112 6.27321 3
 7 -4 -14 -4.6153 6.30608 3
 -7 4 14 -1.3883 6.94502 2
 7 4 -14 -6.6979 5.43531 1
 -6 -4 14 163.927 10.2004 2
 -6 -4 14 188.352 8.45772 3
 6 -4 -14 165.783 9.88227 3
 -6 4 14 186.123 12.1849 2
 6 4 -14 175.814 10.3921 1
 6 4 -14 191.319 12.7424 2
 -5 -4 14 22.9772 3.56834 3
 -5 -4 14 27.8418 4.84332 2
 5 -4 -14 25.4958 5.06572 3
 5 4 -14 18.4 4.93265 1
 5 4 -14 20.4396 5.98937 2
 -5 4 14 20.6114 5.59501 2
 -4 -4 14 310.594 10.7719 2
 4 -4 -14 309.498 9.89769 3
 4 4 -14 305.056 11.016 1
 -4 4 14 320.129 11.4178 2
 4 4 -14 309.623 11.5978 2
 -3 -4 14 82.7738 6.34613 2
 3 -4 -14 89.7901 6.03676 3
 -3 -4 14 48.9888 52.1751 4
 -3 4 14 83.887 6.5269 2
 3 4 -14 81.1741 7.42277 2
 -2 -4 14 367.327 48.9432 4
 -2 -4 14 379.261 11.2999 2
 -2 4 14 394.688 10.3268 2
 2 4 -14 377.121 11.8189 2
 -1 -4 14 312.788 9.87718 2
 -1 4 14 314.47 8.15962 2
 1 4 -14 328.217 10.5432 2
 0 -4 -14 25.535 3.55446 1
 0 -4 14 27.0621 2.14195 3
 0 4 14 29.252 2.81188 2
 0 4 -14 30.3713 4.40724 2
 -1 -4 -14 459.883 13.0539 1
 1 -4 14 466.508 10.0958 3
 -1 4 -14 460.704 10.178 1
 -1 4 -14 469.389 10.3602 3
 -1 4 -14 482.545 13.3732 2
 -3 -4 -14 415.316 13.4889 1
 3 -4 14 392.485 11.0787 3
 -3 4 -14 421.379 11.9234 3
 3 4 14 414.251 12.8954 1
 -4 -4 -14 228.456 11.6411 1
 -4 -4 -14 270.626 11.4818 3
 4 -4 14 264.632 10.3933 3
 4 4 14 253.988 10.4037 1
 -4 4 -14 259.419 11.5527 3
 5 -4 14 -4.3142 4.81073 3
 -5 -4 -14 -2.3405 6.02978 1
 -5 -4 -14 -0.3835 5.97643 3
 -5 -4 -14 7.76733 3.62869 2
 -5 -4 -14 -16.437 23.4495 4
 5 4 14 6.15421 4.78377 1
 -5 4 -14 -7.4108 6.90286 3
 -6 -4 -14 44.5898 8.58133 3
 -6 -4 -14 54.1771 5.93277 2
 6 -4 14 39.0299 5.64018 1
 -6 -4 -14 47.5336 8.92766 1
 -6 -4 -14 3.25012 30.1293 4
 6 -4 14 35.2244 7.17288 3
 6 4 14 51.2917 7.2939 1
 -6 4 -14 43.3125 9.32775 3
 7 -4 14 6.13532 7.64395 3
 -7 -4 -14 2.13587 7.02244 2
 -7 -4 -14 14.9756 10.1443 1
 7 -4 14 -4.3097 6.28092 1
 -7 -4 -14 1.34697 10.2854 3
 -7 4 -14 17.9342 11.6814 3
 7 4 14 6.10077 7.70084 1
 -8 -5 14 4.73443 9.09054 3
 -8 -5 14 -2.5165 9.22326 2
 8 -5 -14 20.0701 9.066 3
 8 5 -14 11.8412 8.04953 1
 -8 5 14 -21.284 10.072 2
 -7 -5 14 11.9546 6.86539 2
 7 -5 -14 16.6776 7.37358 3
 -7 -5 14 17.9757 6.6712 3
 7 5 -14 16.4702 6.8917 1
 -7 5 14 19.8414 8.41821 2
 7 5 -14 26.2124 9.9691 2
 -6 -5 14 6.76262 4.84278 3
 -6 -5 14 0.99233 4.96052 2
 6 -5 -14 2.03533 5.54413 3
 -6 5 14 4.92584 6.25053 2
 6 5 -14 -2.9432 5.25071 1
 6 5 -14 20.0808 7.32308 2
 5 -5 -14 27.1629 5.75678 3
 -5 -5 14 15.5151 79.9773 4
 -5 -5 14 30.9184 3.77286 3
 -5 -5 14 25.9549 4.96966 2
 -5 5 14 22.3728 5.98483 2
 5 5 -14 21.1028 5.93865 2
 5 5 -14 19.0336 5.25521 1
 4 -5 -14 35.5665 5.00203 3
 -4 -5 14 27.1498 4.96737 2
 -4 -5 14 64.7245 71.2333 4
 4 5 -14 30.1022 4.68889 1
 -4 5 14 39.7881 5.47154 2
 4 5 -14 23.8831 5.32951 2
 -3 -5 14 154.317 7.76917 2
 -3 -5 14 68.0869 60.8481 4
 3 5 -14 140.596 9.2343 2
 -3 5 14 138.962 7.80452 2
 3 5 -14 146.429 7.72649 1
 -2 -5 14 16.3668 55.5262 4
 -2 -5 14 3.50202 3.00883 2
 -2 5 14 3.59176 3.14914 2
 2 5 -14 -5.4359 3.95918 2
 2 5 -14 -0.0833 2.90576 1
 1 5 -14 7.47358 4.16114 2
 -1 5 14 8.95091 2.57413 2
 1 5 -14 4.82878 2.74847 1
 0 -5 -14 140.932 7.07326 1
 0 -5 14 129.135 4.5887 3
 0 5 -14 136.435 8.33899 2
 0 5 -14 132.051 4.79283 1
 -2 -5 -14 463.587 14.0887 1
 2 -5 14 444.529 11.0423 3
 -2 5 -14 443.196 14.013 2
 -2 5 -14 424.527 11.6217 3
 -3 -5 -14 146.014 9.34013 1
 3 -5 14 145.262 7.81969 3
 -3 5 -14 181.228 28.9763 4
 -3 5 -14 144.897 9.24516 3
 4 -5 14 5.7424 4.4926 3
 -4 -5 -14 8.27676 5.9884 3
 -4 -5 -14 1.14504 5.11666 1
 -4 5 -14 4.37512 6.1487 3
 4 5 14 10.1586 3.71166 1
 -5 -5 -14 33.531 7.31822 3
 -5 -5 -14 29.4536 6.76138 1
 5 -5 14 32.2685 6.8184 3
 -5 5 -14 27.5474 8.10776 3
 5 5 14 28.0276 5.05386 1
 -6 -5 -14 -4.085 4.24958 2
 -6 -5 -14 1.21004 7.82814 1
 6 -5 14 -0.4724 7.00453 3
 -6 -5 -14 4.16278 8.98026 3
 -6 -5 -14 43.4045 33.9156 4
 -6 5 -14 5.71622 9.52311 3
 6 5 14 -8.7683 5.57476 1
 7 -5 14 9.02755 9.18861 3
 -7 -5 -14 22.1768 10.7561 1
 7 -5 14 7.11871 5.84921 1
 -7 -5 -14 3.33582 44.1122 4
 -7 -5 -14 6.39763 10.5256 3
 -7 -5 -14 -3.1526 6.43442 2
 7 5 14 -2.6488 7.86412 1
 -7 5 -14 27.3518 12.5735 3
 -7 -6 14 27.1555 8.20788 2
 7 -6 -14 30.5572 8.28876 3
 -7 -6 14 13.4588 7.08543 3
 7 6 -14 39.7106 11.1994 2
 -7 6 14 3.99596 9.00443 2
 7 6 -14 19.2794 7.88823 1
 6 -6 -14 33.4251 7.07725 3
 -6 -6 14 46.412 5.63607 3
 -6 -6 14 40.6773 7.47058 2
 -6 6 14 41.1297 8.23677 2
 6 6 -14 27.8635 7.06912 1
 6 6 -14 43.1782 8.83379 2
 -5 -6 14 9.30848 3.89785 3
 -5 -6 14 -58.818 89.8131 4
 -5 -6 14 1.09226 5.26127 2
 5 -6 -14 -2.2376 5.30347 3
 -5 6 14 -3.9713 5.90095 2
 5 6 -14 2.06878 5.24129 1
 5 6 -14 -0.3091 6.34095 2
 4 -6 -14 120.183 8.70552 3
 -4 -6 14 156.03 8.8734 2
 -4 -6 14 56.434 79.9314 4
 4 6 -14 124.758 10.2621 2
 4 6 -14 133.314 8.78267 1
 -4 6 14 122.588 9.32605 2
 -3 -6 14 16.2007 71.9043 4
 -3 -6 14 22.5687 4.20629 2
 3 6 -14 26.9934 6.24886 2
 3 6 -14 21.6669 4.37417 1
 -3 6 14 20.6103 4.56516 2
 -2 -6 14 202.02 71.1219 4
 -2 -6 14 216.971 9.01748 2
 2 6 -14 206.082 8.01913 1
 2 6 -14 210.586 10.5218 2
 -2 6 14 194.47 8.04815 2
 -1 -6 14 194.966 5.44618 3
 1 -6 -14 190.471 8.53686 1
 1 6 -14 207.185 10.0433 2
 -1 6 14 212.479 6.66895 2
 1 6 -14 195.813 6.9446 1
 0 -6 14 221.486 6.61721 3
 0 -6 -14 217.344 9.19741 1
 0 6 -14 222.601 10.4459 2
 1 -6 14 711.3 14.5494 3
 -1 -6 -14 672.977 18.3668 1
 -1 6 -14 692.818 18.5472 2
 -2 -6 -14 29.3338 4.96729 1
 2 -6 14 36.1523 4.52033 3
 -2 6 -14 48.7099 6.61521 2
 3 -6 14 -11.69 4.20993 3
 -3 -6 -14 -2.5856 4.53467 1
 -3 6 -14 0.88743 5.51755 3
 -3 6 -14 1.48835 35.5959 4
 -4 -6 -14 40.7512 29.4289 4
 4 -6 14 -3.2102 5.3083 3
 -4 -6 -14 -0.2282 5.19448 1
 4 6 14 5.39363 3.94729 1
 -4 6 -14 0.22907 7.088 3
 -5 -6 -14 38.9739 7.47809 1
 5 -6 14 57.3462 7.44263 3
 -5 -6 -14 58.2637 9.30206 3
 -5 -6 -14 78.1694 35.2351 4
 5 6 14 42.274 5.52335 1
 -5 6 -14 46.8873 9.3489 3
 -6 -6 -14 42.3597 9.29543 1
 -6 -6 -14 31.1996 10.1953 3
 6 -6 14 45.8356 8.36772 3
 -6 6 -14 51.8797 11.3757 3
 6 6 14 44.4732 7.2161 1
 -7 -7 14 -0.3639 7.63782 3
 -7 -7 14 -2.2237 9.10471 2
 7 -7 -14 -1.7178 8.86724 3
 7 7 -14 3.05227 9.19455 1
 7 7 -14 1.34577 12.0257 2
 -7 7 14 -17.718 9.81479 2
 6 -7 -14 5.52859 7.75903 3
 -6 -7 14 -1.1517 6.93804 2
 -6 -7 14 19.7001 5.95085 3
 -6 -7 14 29.4896 114.851 4
 6 7 -14 13.273 7.25358 1
 -6 7 14 -4.5204 7.57618 2
 6 7 -14 17.2982 9.44717 2
 5 -7 -14 36.4825 6.9565 3
 -5 -7 14 53.4785 7.45977 2
 -5 -7 14 40.0871 4.73957 3
 -5 7 14 37.61 7.1421 2
 5 7 -14 33.3313 8.52163 2
 5 7 -14 36.4404 6.66598 1
 -4 -7 14 5.95775 3.16202 3
 -4 -7 14 8.89931 89.7612 4
 4 -7 -14 7.6425 5.01304 3
 -4 -7 14 4.76553 4.54565 2
 4 7 -14 7.91437 6.86735 2
 -4 7 14 2.69278 5.29846 2
 4 7 -14 -7.5729 4.65765 1
 -3 -7 14 85.2898 4.41678 3
 -3 -7 14 -3.5627 83.9345 4
 -3 -7 14 89.7074 4.63827 3
 -3 -7 14 99.1732 7.98744 2
 3 7 -14 104.319 10.7311 2
 3 7 -14 74.9868 7.73899 1
 -3 7 14 81.8241 8.13358 2
 2 -7 -14 97.9457 39.8877 4
 2 7 -14 9.18166 5.4283 2
 2 7 -14 12.1965 3.88624 1
 1 -7 -14 327.472 11.5459 1
 -1 -7 14 312.449 8.0405 3
 1 7 -14 299.506 8.85633 1
 1 7 -14 311.414 12.8075 2
 -1 7 14 330.852 8.85918 2
 0 -7 -14 130.973 8.07106 1
 0 -7 14 127.007 6.34287 3
 0 7 -14 130.919 9.81191 2
 -1 7 -14 147.587 38.8733 4
 2 -7 14 41.386 5.16208 3
 -2 -7 -14 36.7366 5.61872 1
 -2 -7 -14 43.663 26.491 4
 -2 7 -14 30.3406 6.14654 2
 -2 7 -14 18.7562 35.6141 4
 3 -7 14 26.4178 5.51846 3
 -3 -7 -14 23.8361 5.86261 1
 -3 -7 -14 49.4644 30.6984 4
 -3 7 -14 9.46957 41.5751 4
 -4 -7 -14 16.7147 6.46107 1
 -4 -7 -14 52.3499 35.3821 4
 4 -7 14 9.68683 6.07128 3
 -4 7 -14 11.8202 7.71417 3
 4 7 14 9.54776 4.5854 1
 5 -7 14 69.1655 8.42134 3
 -5 -7 -14 45.3983 40.8836 4
 -5 -7 -14 55.7864 8.55196 1
 -5 -7 -14 36.507 9.80413 3
 5 7 14 60.3047 6.57453 1
 -5 7 -14 53.8053 10.3593 3
 -6 -7 -14 -6.5687 8.67226 1
 -6 -7 -14 33.7062 45.6669 4
 -6 -7 -14 16.3738 10.884 3
 6 -7 14 1.1163 8.87479 3
 -6 7 -14 14.6564 12.169 3
 -6 -8 14 77.426 7.32704 3
 -6 -8 14 81.8865 10.2304 2
 6 -8 -14 88.6345 10.7424 3
 -6 -8 14 -116.64 133.016 4
 6 8 -14 70.1436 9.89109 1
 6 8 -14 95.8678 12.6927 2
 -6 8 14 71.8817 10.1172 2
 5 -8 -14 -6.9534 6.87531 3
 -5 -8 14 3.38757 4.81402 3
 -5 -8 14 2.72562 6.65321 2
 -5 8 14 -1.3188 7.0596 2
 5 8 -14 -3.109 8.54509 2
 5 8 -14 -1.3154 6.72016 1
 -4 -8 14 11.6106 106.07 4
 -4 -8 14 48.0528 4.45194 3
 -4 -8 14 54.521 7.11404 2
 4 -8 -14 50.069 7.11724 3
 4 -8 -14 33.7515 52.1926 4
 -4 8 14 37.2878 7.11482 2
 4 8 -14 41.5885 6.8475 1
 4 8 -14 39.7601 8.77015 2
 -3 -8 14 45.1449 97.5163 4
 3 -8 -14 104.46 49.2864 4
 2 -8 -14 -2.4393 40.3369 4
 2 -8 -14 35.7054 5.16773 1
 -2 -8 14 41.5178 3.9992 3
 2 8 -14 44.1705 7.03277 2
 -2 8 14 43.5307 5.18115 2
 2 8 -14 42.2276 4.88457 1
 -1 -8 14 202.499 7.56822 3
 1 -8 -14 205.469 10.3669 1
 1 8 -14 208.892 12.1295 2
 1 8 -14 203.586 7.26931 1
 -1 8 14 193.976 7.60276 2
 0 -8 -14 15.9628 4.76888 1
 0 -8 14 16.4972 4.35003 3
 0 -8 -14 43.7282 34.2254 4
 0 8 -14 27.261 40.1576 4
 0 8 -14 23.6048 5.96332 2
 1 -8 14 156.16 8.61332 3
 -1 -8 -14 170.982 10.405 1
 -1 -8 -14 101.818 31.3822 4
 -1 8 -14 168.647 11.5364 2
 -2 -8 -14 3.26861 5.12609 1
 2 -8 14 4.90821 5.06118 3
 -2 8 -14 9.01255 6.49845 2
 -2 8 -14 13.8332 44.4448 4
 -3 -8 -14 43.448 34.9442 4
 -3 -8 -14 24.7053 6.53411 1
 3 -8 14 46.0931 6.62989 3
 -3 8 -14 39.9765 51.9833 4
 -3 8 -14 25.9939 7.03122 2
 -4 -8 -14 10.1425 37.3304 4
 4 -8 14 10.2726 7.00923 3
 -4 -8 -14 14.8058 7.16847 1
 -5 -8 -14 50.1842 46.0692 4
 -5 -8 -14 48.0445 9.17515 1
 5 -8 14 46.3622 9.79199 3
 5 8 14 35.2059 6.6466 1
 -5 -9 14 14.5588 8.73141 2
 -5 -9 14 1.84944 5.7844 3
 5 -9 -14 -25.632 73.3916 4
 5 -9 -14 -11.299 7.90849 3
 -5 -9 14 90.5538 140.449 4
 5 9 -14 5.50749 7.70311 1
 5 9 -14 8.15224 10.8315 2
 -5 9 14 -2.5339 8.2704 2
 -4 -9 14 20.208 6.93094 2
 4 -9 -14 31.8588 61.6713 4
 4 -9 -14 15.3894 6.84889 3
 -4 -9 14 12.4995 5.09981 3
 -4 -9 14 -19.351 124.154 4
 4 9 -14 11.9406 9.35643 2
 -4 9 14 15.6249 7.4294 2
 4 9 -14 10.5642 6.40789 1
 3 -9 -14 106.577 11.0933 1
 3 -9 -14 101.08 9.94164 3
 -3 -9 14 99.0887 7.52185 3
 3 -9 -14 22.826 50.6592 4
 -3 -9 14 -18.362 111.717 4
 3 9 -14 116.387 10.8184 2
 3 9 -14 114.925 9.70437 1
 -3 9 14 93.9589 10.5512 2
 -2 -9 14 32.3188 4.67729 3
 2 -9 -14 112.502 48.2386 4
 2 -9 -14 36.599 6.34231 1
 2 9 -14 40.1225 8.476 2
 2 9 -14 32.9164 5.07501 1
 -2 9 14 29.4364 5.65378 2
 -1 -9 14 21.5003 4.78563 3
 1 -9 -14 40.6458 45.7018 4
 1 -9 -14 15.3453 5.88 1
 -1 9 14 10.966 4.29342 2
 1 9 -14 17.2646 3.38289 1
 1 9 -14 24.8564 6.9787 2
 0 -9 14 94.3112 8.40097 3
 0 -9 -14 119.978 10.6093 1
 0 9 -14 92.0718 8.74005 2
 -1 -9 -14 122.411 37.1692 4
 -1 9 -14 78.2816 55.3703 4
 2 -9 14 126.421 10.7587 3
 -2 -9 -14 113.995 11.2874 1
 -2 9 -14 102.078 9.62646 2
 3 -9 14 55.8774 8.41126 3
 -3 -9 -14 -6.0139 41.1935 4
 -3 -9 -14 28.8388 7.51218 1
 -3 9 -14 32.4857 9.06115 2
 4 -9 14 26.6328 8.70331 3
 -4 -9 -14 4.40279 45.2097 4
 -4 -9 -14 33.0169 9.33316 1
 -4 -10 14 8.68284 6.16277 3
 -4 -10 14 -25.2 149.391 4
 4 -10 -14 -7.2208 7.75492 1
 4 -10 -14 6.10899 71.0908 4
 4 -10 -14 14.2175 7.77563 3
 4 10 -14 3.06039 11.0732 2
 -4 10 14 0.26946 8.15872 2
 4 10 -14 9.97703 6.9279 1
 3 -10 -14 110.721 12.7258 1
 -3 -10 14 91.4769 9.20513 3
 3 -10 -14 79.9674 9.01622 3
 3 -10 -14 49.9024 61.7831 4
 3 10 -14 87.8706 7.85481 1
 -3 10 14 89.6521 8.6752 2
 3 10 -14 82.5527 11.6003 2
 2 -10 -14 -9.3112 51.0742 4
 -2 -10 14 13.5938 5.70947 3
 2 -10 -14 11.842 7.03242 1
 2 10 -14 4.02497 8.84793 2
 -2 10 14 1.68348 6.1383 2
 2 10 -14 0.82034 4.84054 1
 1 -10 -14 50.7873 55.9861 4
 -1 -10 14 5.14074 5.62382 3
 1 -10 -14 8.77795 6.73819 1
 1 10 -14 2.27019 7.9215 2
 -1 10 14 -1.8329 4.73986 2
 1 10 -14 8.60266 3.16025 1
 -1 10 14 7.87167 4.88859 2
 0 -10 -14 111.265 49.3117 4
 0 -10 14 7.29394 6.00642 3
 0 -10 -14 -0.2608 7.1192 1
 1 -10 14 12.5087 6.92221 3
 -1 -10 -14 10.4108 7.30855 1
 -1 -10 -14 -8.4301 39.3104 4
 -1 10 -14 10.9389 8.64507 2
 -3 -10 -14 27.6814 9.67402 1
 3 -10 14 8.12035 8.6458 3
 -3 -10 -14 23.2729 50.5813 4
 -3 10 -14 26.1022 9.94558 2
 3 -11 -14 6.32292 7.51706 3
 3 -11 -14 29.241 9.31707 1
 -3 -11 14 35.7648 7.39838 3
 3 11 -14 23.8754 12.5752 2
 3 11 -14 13.9182 7.31019 1
 -2 -11 14 13.1175 7.09277 3
 2 -11 -14 -22.684 63.124 4
 2 -11 -14 9.35536 8.71377 1
 -2 11 14 -3.0436 7.08982 2
 2 11 -14 9.65032 5.14084 1
 2 11 -14 3.27894 11.695 2
 -1 -11 14 24.3533 7.52759 3
 1 -11 -14 36.8082 9.36973 1
 -1 11 14 17.701 6.16907 2
 1 11 -14 24.3045 10.3304 2
 -1 11 14 18.6183 5.72686 2
 0 -11 -14 95.9755 11.153 1
 0 -11 14 92.3977 8.85714 3
 0 -11 -14 63.3459 62.2369 4
 0 11 -14 95.0815 12.6945 2
 1 -11 14 -13.407 8.12807 3
 -1 -11 -14 7.24316 53.8899 4
 -1 -11 -14 15.3737 9.21891 1
 -1 11 -14 -4.653 9.42533 2
 2 -11 14 13.0563 9.58898 3
 -2 -11 -14 31.5126 11.0225 1
 -2 11 -14 50.9924 12.3207 2
 8 0 -15 3.54488 5.59215 1
 -8 0 15 -1.7484 6.02834 2
 8 0 -15 -0.4204 6.2373 3
 -7 0 15 -1.8821 5.20377 2
 7 0 -15 10.954 4.92448 3
 6 0 -15 -1.9096 3.68146 3
 -6 0 15 -0.3627 4.38081 2
 -5 0 15 1.8494 3.7829 2
 5 0 -15 0.4228 2.84819 3
 4 0 -15 7.17984 4.42297 2
 -4 0 15 -4.2213 3.1587 2
 4 0 -15 -2.6821 2.38074 3
 3 0 -15 0.62715 3.42638 2
 -3 0 15 3.48236 2.84532 2
 3 0 -15 -0.5139 1.92025 3
 -2 0 15 -0.0098 2.56897 2
 2 0 -15 0.55286 2.90661 2
 -1 0 15 0.20415 2.48743 2
 1 0 -15 2.51535 2.7869 2
 0 0 -15 0.89921 2.60029 2
 0 0 15 1.79911 2.27846 2
 -1 0 -15 5.33507 2.67281 2
 -2 0 -15 1.89831 2.93102 3
 -2 0 -15 1.59169 2.71755 1
 -2 0 -15 1.79875 2.9491 2
 -3 0 -15 0.27883 3.68291 3
 -3 0 -15 1.17399 3.54643 1
 -4 0 -15 4.23049 4.40466 1
 4 0 15 3.11331 3.55881 1
 -4 0 -15 -0.4741 4.84493 3
 5 0 15 -2.8585 4.23615 1
 -5 0 -15 1.2783 5.24867 1
 -5 0 -15 -7.2086 6.0297 3
 -6 0 -15 -0.7724 7.94418 3
 6 0 15 3.35628 5.55632 1
 -6 0 -15 7.59261 7.05421 1
 -7 0 -15 1.07887 8.70733 1
 -7 0 -15 -4.3194 10.0233 3
 7 0 15 -2.6042 7.29014 1
 -8 -1 15 -8.4902 6.33764 2
 -8 -1 15 3.08884 8.09437 3
 8 -1 -15 3.66901 6.78566 3
 8 1 -15 -4.6337 5.87654 1
 -8 1 15 7.05782 6.34563 2
 8 1 -15 -6.6558 6.53967 3
 7 -1 -15 4.75251 5.14089 3
 -7 -1 15 8.9252 5.51312 2
 -7 1 15 10.8013 5.48061 2
 7 1 -15 7.62831 5.07824 3
 -6 -1 15 88.5221 8.20826 2
 6 -1 -15 104.616 7.23153 3
 6 1 -15 82.0453 6.50587 3
 -6 1 15 92.4605 8.987 2
 5 -1 -15 4.69622 3.48248 3
 -5 -1 15 2.26802 3.82241 2
 -5 1 15 7.08494 4.27042 2
 5 1 -15 6.16962 2.70775 3
 5 1 -15 8.04158 5.24217 2
 -4 -1 15 477.905 13.3388 2
 4 -1 -15 475.308 10.6411 3
 4 1 -15 451.428 9.51849 3
 4 1 -15 480.704 13.9369 2
 -4 1 15 486.738 13.4932 2
 3 -1 -15 4.23794 2.36027 3
 3 -1 -15 6.11861 3.69719 2
 -3 -1 15 9.63464 3.29086 2
 -3 1 15 4.23877 2.91693 2
 3 1 -15 2.61766 3.30987 2
 3 1 -15 6.53625 1.58383 3
 -2 -1 15 639.156 15.2585 2
 2 -1 -15 652.461 15.0999 2
 2 1 -15 629.605 15.4149 2
 -2 1 15 651.891 14.9667 2
 -1 -1 15 389.78 10.4444 2
 1 -1 -15 379.625 10.0196 2
 1 1 -15 392.462 7.49222 3
 -1 1 15 386.049 9.95053 2
 1 1 -15 370.682 10.608 2
 0 -1 -15 48.6006 4.49603 2
 0 1 15 50.2585 3.97759 2
 0 1 -15 49.9557 5.15534 2
 0 1 -15 44.4692 3.37675 3
 -1 -1 -15 472.884 11.2016 2
 -1 -1 -15 481.385 12.6341 1
 -1 1 -15 500.75 10.5051 3
 -1 1 -15 479.188 12.2589 2
 -1 1 -15 472.586 11.9271 1
 -2 -1 -15 59.3854 5.72776 3
 -2 -1 -15 58.8283 5.02564 2
 -2 -1 -15 64.9663 5.68879 1
 -2 1 -15 63.3667 5.8845 2
 -2 1 -15 60.935 5.09725 1
 -2 1 -15 61.9929 5.25214 3
 -3 -1 -15 542.159 14.7861 1
 -3 -1 -15 546.96 13.7009 3
 -3 -1 -15 542.919 13.1188 2
 -3 1 -15 525.214 13.7387 1
 -3 1 -15 530.898 13.0949 3
 4 -1 15 47.097 4.94461 1
 -4 -1 -15 45.1824 5.86774 1
 -4 -1 -15 44.4581 5.63965 3
 -4 1 -15 45.9238 5.15667 1
 -4 1 -15 46.3705 6.13172 3
 4 1 15 50.7209 5.31072 1
 5 -1 15 85.9864 8.26875 1
 -5 -1 -15 111.647 9.75126 1
 -5 -1 -15 83.0289 7.79878 3
 5 1 15 90.596 8.47086 1
 -5 1 -15 103.059 8.4675 3
 -5 1 -15 105.979 8.98637 1
 -6 -1 -15 108.007 9.85088 3
 -6 -1 -15 107.961 12.3307 1
 6 -1 15 111.459 10.3341 1
 -6 1 -15 103.237 9.99635 3
 -6 1 -15 111.246 11.2117 1
 6 1 15 113.659 10.5213 1
 -7 -1 -15 2.1138 9.09499 1
 -7 -1 -15 5.79908 10.5357 3
 7 -1 15 -8.3896 7.00892 1
 -7 1 -15 0.63401 10.879 3
 7 1 15 -2.1069 7.52727 1
 -8 -2 15 17.3158 8.21068 3
 8 -2 -15 6.16151 6.99901 3
 -8 -2 15 6.71538 6.10211 2
 8 2 -15 20.0021 6.43547 1
 -8 2 15 7.60711 7.574 2
 7 -2 -15 7.73916 5.32042 3
 -7 -2 15 2.26727 5.27341 2
 -7 -2 15 10.8636 6.07295 3
 -7 2 15 13.2034 6.01971 2
 7 2 -15 11.9615 5.12798 1
 6 -2 -15 1.53591 4.23493 3
 -6 -2 15 5.31268 4.3822 2
 -6 -2 15 1.13399 4.54924 3
 -6 2 15 5.5118 5.17343 2
 -5 -2 15 7.55569 3.82601 2
 5 -2 -15 0.80784 3.83623 3
 5 2 -15 0.73136 4.91839 2
 -5 2 15 2.15799 4.09182 2
 -4 -2 15 10.4911 3.54768 2
 4 -2 -15 5.32698 3.16706 3
 4 2 -15 8.66446 4.06073 2
 -4 2 15 9.28741 3.80728 2
 -3 -2 15 128.013 6.74913 2
 3 -2 -15 126.821 5.63313 3
 -3 2 15 121.871 6.76634 2
 3 2 -15 132.017 7.40386 2
 2 -2 -15 14.8639 3.45011 2
 -2 -2 15 12.6131 3.12173 2
 2 2 -15 10.9743 3.79026 2
 -2 2 15 14.9649 3.11903 2
 -1 -2 15 29.8307 3.53684 2
 1 -2 -15 41.9076 4.58605 2
 1 2 -15 32.0571 3.81272 2
 -1 2 15 27.6144 3.13617 2
 0 -2 -15 69.4941 4.20046 2
 0 2 -15 70.3196 6.0562 2
 0 2 -15 66.378 3.65224 3
 0 2 15 66.132 4.03261 2
 -1 -2 -15 105.967 4.53235 2
 -1 -2 -15 102.339 5.91184 1
 -1 2 -15 89.1988 4.89157 3
 -1 2 -15 90.5211 6.50231 2
 -1 2 -15 104.443 4.93082 1
 -2 -2 -15 2.36482 2.3832 2
 -2 -2 -15 -1.0689 3.11828 1
 -2 2 -15 2.73936 2.56579 1
 -2 2 -15 -3.3817 3.33761 3
 -2 2 -15 -0.1184 3.49675 2
 -3 -2 -15 4.11689 3.82766 1
 -3 -2 -15 0.06035 4.12256 3
 -3 -2 -15 0.75385 2.96398 2
 -3 2 -15 10.4501 4.35788 3
 -3 2 -15 2.12196 3.23599 1
 -4 -2 -15 8.33079 4.99883 1
 -4 -2 -15 0.64813 5.00926 3
 4 2 15 3.14876 3.56659 1
 -4 2 -15 4.30127 5.23488 3
 -4 2 -15 36.8071 17.6317 4
 -4 2 -15 0.46018 3.72485 1
 -5 -2 -15 10.3458 6.05734 3
 -5 -2 -15 21.9663 6.26685 1
 5 -2 15 4.07399 4.18801 1
 5 2 15 1.04555 4.62376 1
 -5 2 -15 11.6833 4.99429 1
 -5 2 -15 19.0512 7.02776 3
 -6 -2 -15 8.20615 7.84726 3
 6 -2 15 6.40499 5.39862 1
 -6 -2 -15 12.8365 7.6622 1
 6 2 15 5.23538 6.01794 1
 -6 2 -15 7.13385 7.99079 3
 -7 -2 -15 -26.641 9.25058 3
 -7 -2 -15 -5.1684 9.63679 1
 7 -2 15 5.24961 7.17669 1
 7 2 15 5.91267 7.46533 1
 -7 2 -15 0.77743 9.92187 3
 8 -3 -15 7.77024 7.50472 3
 -8 -3 15 21.3378 6.97369 2
 -8 -3 15 11.8132 8.53561 3
 8 3 -15 -4.6117 6.13365 1
 -8 3 15 6.17021 8.60265 2
 -7 -3 15 41.4122 6.69949 2
 -7 -3 15 34.7414 6.63344 3
 7 -3 -15 46.8677 6.95121 3
 7 3 -15 34.9899 6.14353 1
 -7 3 15 49.2167 7.97808 2
 6 -3 -15 122.415 8.91067 3
 -6 -3 15 131.676 9.40218 2
 -6 -3 15 121.735 7.81414 3
 6 3 -15 116.181 9.42356 1
 6 3 -15 158.095 12.1468 2
 -6 3 15 138.728 10.8792 2
 -5 -3 15 0.16467 3.99219 2
 5 -3 -15 6.32332 4.23457 3
 5 3 -15 6.69496 5.08105 2
 -5 3 15 -0.4303 4.75232 2
 4 -3 -15 477.692 12.0609 3
 -4 -3 15 503.691 14.1829 2
 4 3 -15 485.638 14.6465 2
 -4 3 15 486.402 13.9789 2
 -3 -3 15 28.6856 3.72308 2
 3 -3 -15 34.268 3.77321 3
 3 3 -15 26.3601 4.67718 2
 -3 3 15 29.3455 4.10773 2
 -2 -3 15 200.761 7.84165 2
 2 3 -15 192.628 8.63512 2
 -2 3 15 192.763 7.17663 2
 -1 -3 15 439.877 12.0927 2
 1 3 -15 456.989 12.6687 2
 -1 3 15 452.91 10.6965 2
 0 -3 -15 87.9423 4.19618 2
 0 -3 15 24.8669 31.8168 4
 0 -3 -15 80.7297 5.25954 1
 0 3 -15 77.2354 6.38413 2
 0 3 15 76.1079 3.8107 2
 0 3 -15 70.58 3.56332 3
 -1 -3 -15 404.608 11.891 1
 -1 -3 -15 420.306 8.87447 2
 -1 3 -15 415.203 10.0296 1
 -1 3 -15 408.468 11.9906 2
 -1 3 -15 415.729 9.49019 3
 -2 -3 -15 0.57261 3.33747 1
 2 -3 15 1.3887 2.68999 3
 -2 3 -15 -0.8907 3.59231 2
 -2 3 -15 0.12503 2.35811 1
 -2 3 -15 5.63179 3.54988 3
 3 -3 15 553.164 13.3779 3
 -3 -3 -15 575.541 11.9436 2
 -3 -3 -15 573.741 14.578 3
 -3 -3 -15 561.359 15.9248 1
 -3 3 -15 546.392 13.9179 3
 -3 3 -15 576.496 13.0752 1
 -4 -3 -15 5.3391 5.37954 1
 -4 -3 -15 16.1818 5.49465 3
 4 -3 15 2.76146 4.48264 3
 -4 3 -15 7.01994 3.56463 1
 -4 3 -15 33.5215 24.6394 4
 4 3 15 6.8923 4.04178 1
 -4 3 -15 15.29 5.72092 3
 -5 -3 -15 107.95 11.0033 1
 -5 -3 -15 89.9972 8.25392 3
 5 -3 15 101.368 9.21654 3
 -5 3 -15 102 8.7676 3
 5 3 15 99.7973 9.27874 1
 -6 -3 -15 181.922 13.9206 3
 -6 -3 -15 165.717 9.79983 2
 -6 -3 -15 183.647 15.0879 1
 6 -3 15 169.853 12.0819 3
 6 -3 15 184.453 10.679 1
 6 3 15 189.242 12.6361 1
 -6 3 -15 184.82 14.7199 3
 -7 -3 -15 -15.24 39.222 4
 -7 -3 -15 7.63349 10.8092 3
 7 -3 15 11.5695 6.92312 1
 -7 -3 -15 -13.157 7.24552 2
 -7 -3 -15 25.5841 10.6399 1
 7 -3 15 11.0447 7.59501 3
 -7 3 -15 6.4619 11.1756 3
 7 3 15 6.2965 7.9326 1
 -8 -4 15 -2.4535 7.64076 2
 8 -4 -15 16.6579 8.86731 3
 -8 -4 15 18.841 8.67533 3
 8 4 -15 8.03567 7.46573 1
 -8 4 15 33.8 10.4074 2
 7 -4 -15 -14.472 6.1539 3
 -7 -4 15 7.25985 6.22716 3
 -7 -4 15 -6.1125 5.63563 2
 7 4 -15 -10.477 5.58139 1
 -7 4 15 -2.8385 7.54166 2
 -6 -4 15 8.40816 4.60444 3
 6 -4 -15 14.9703 5.58715 3
 -6 -4 15 6.12074 4.96651 2
 6 4 -15 17.9094 6.86002 2
 6 4 -15 13.4123 5.50286 1
 -6 4 15 7.71457 6.06614 2
 -5 -4 15 104.022 7.9151 2
 5 -4 -15 93.5434 8.06191 3
 -5 -4 15 90.3197 5.20517 3
 -5 4 15 88.5297 9.55323 2
 5 4 -15 86.0447 8.3118 1
 5 4 -15 99.432 9.83506 2
 4 -4 -15 123.113 7.37854 3
 -4 -4 15 107.557 7.69355 2
 4 4 -15 122.71 9.29468 2
 4 4 -15 123.127 8.19218 1
 -4 4 15 131.174 8.84864 2
 -3 -4 15 136.183 7.34361 2
 -3 -4 15 60.9291 56.6392 4
 -3 4 15 131.582 7.56389 2
[truncated: 174,297 more chars]
